# Supplementary material for: Proteome Profile of Starch Granules Purified from Rice (Oryza sativa) Endosperm
Source: PubMed Central journal article supplement (PMC5167393; doi:10.1371/journal.pone.0168467), 2016-12-19

Mass Peak of Peptides Had been Modified by Kac in Starch and Sucrose Biosynthesis Pathway

P15280-217:

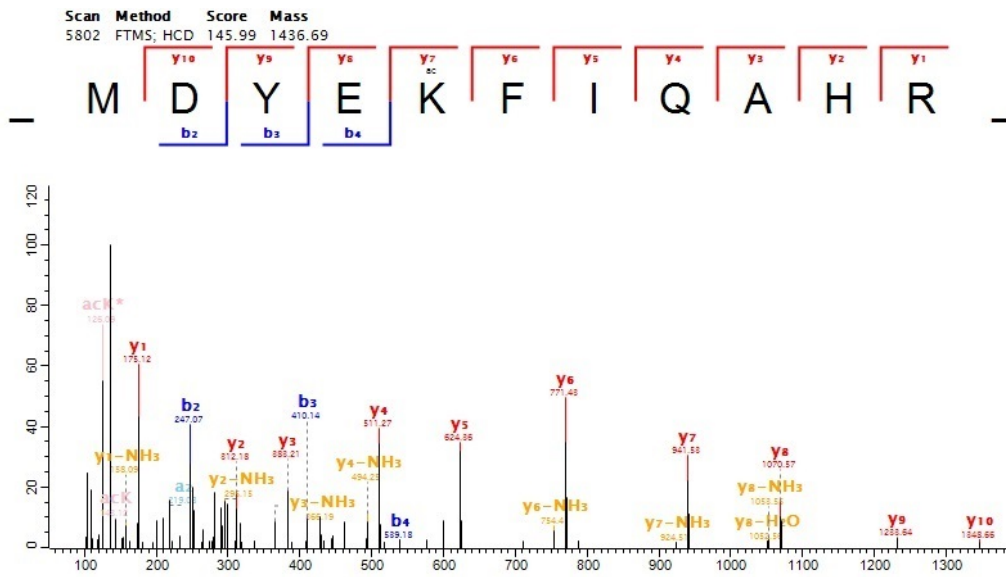

P15280-261:

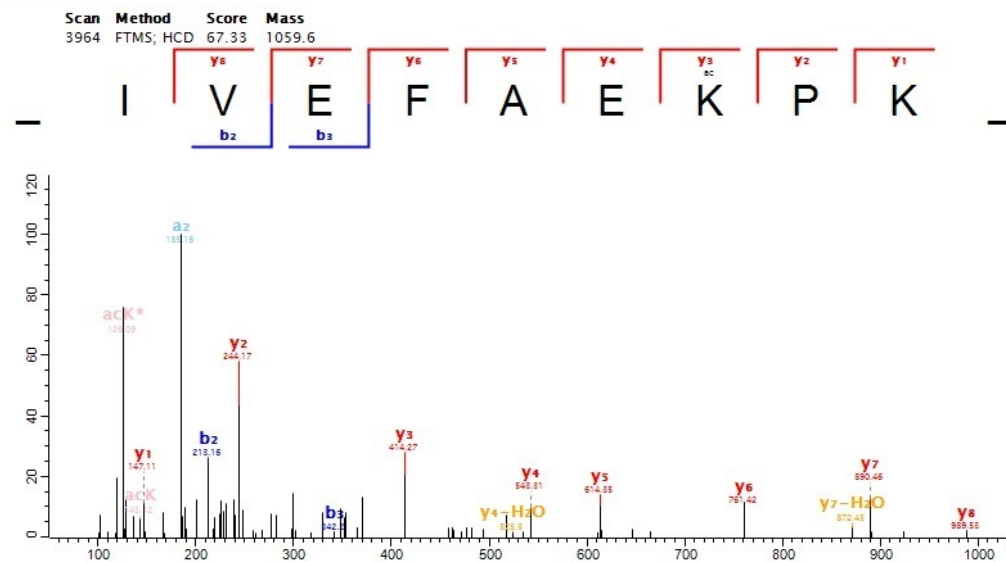

Q0D9D0-89:

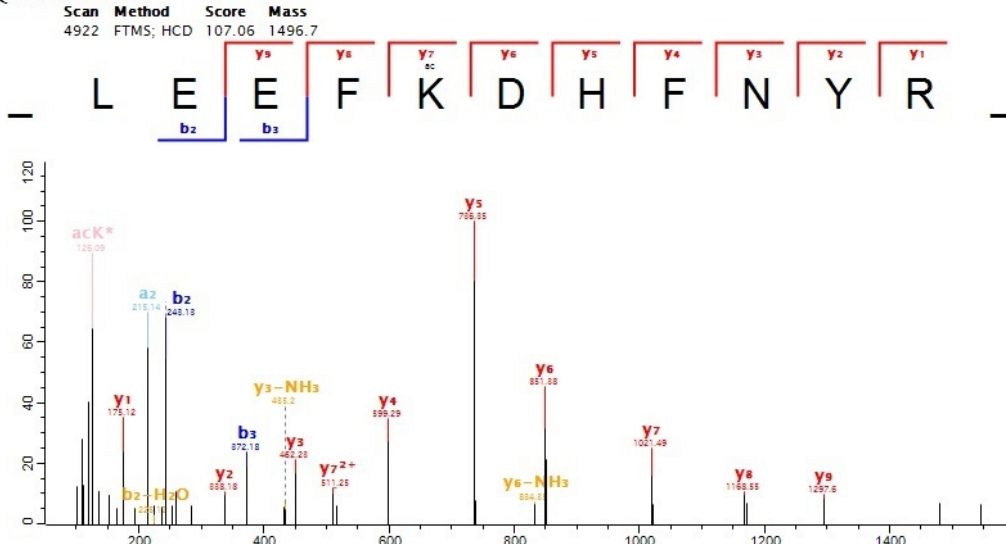

Q0D9D0-103:

Scan Method Score Mass  
4688 FTMS; HCD 53.57 1308.67

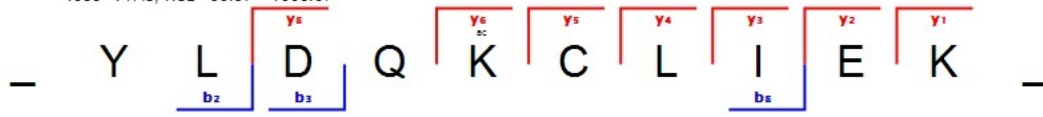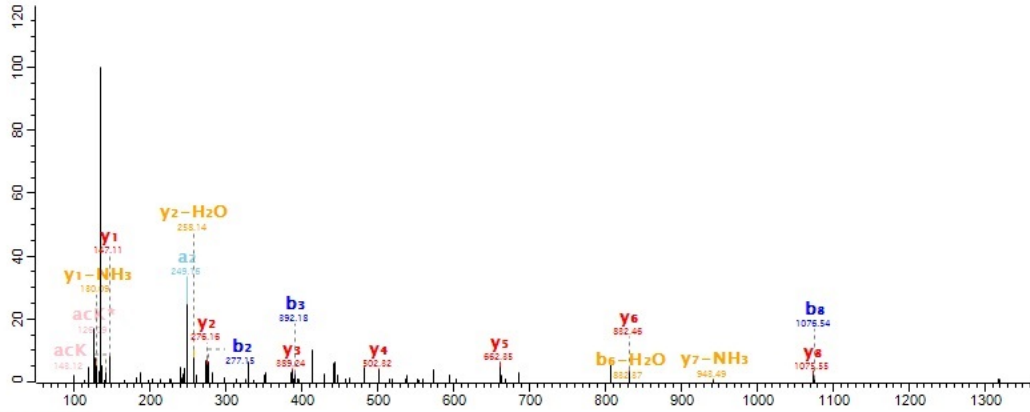

Q0D9D0-118:

Scan Method Score Mass  
5834 FTMS; HCD 79.89 1592.78

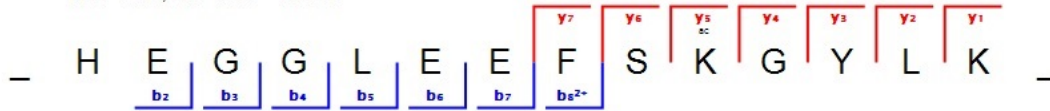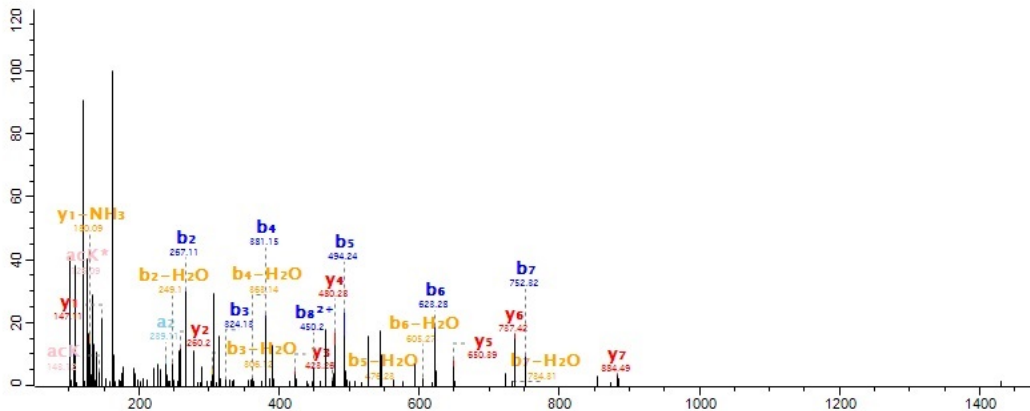

Q0D9D0-164:

Scan Method Score Mass  
7297 FTMS; HCD 72.1 1092.6

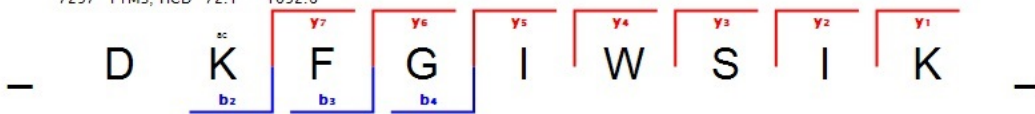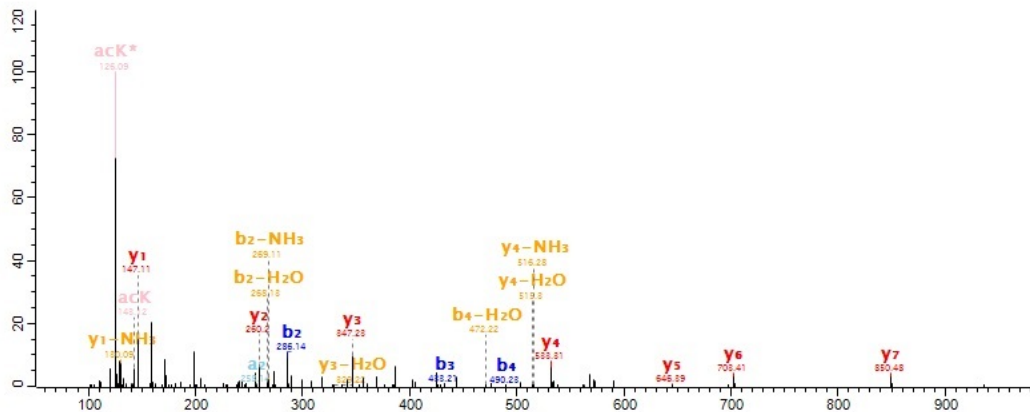

Q0D9D0-236:

Scan Method Score Mass  
2607 FTMS; HCD 121.56 1803.99

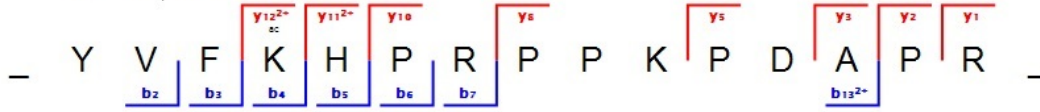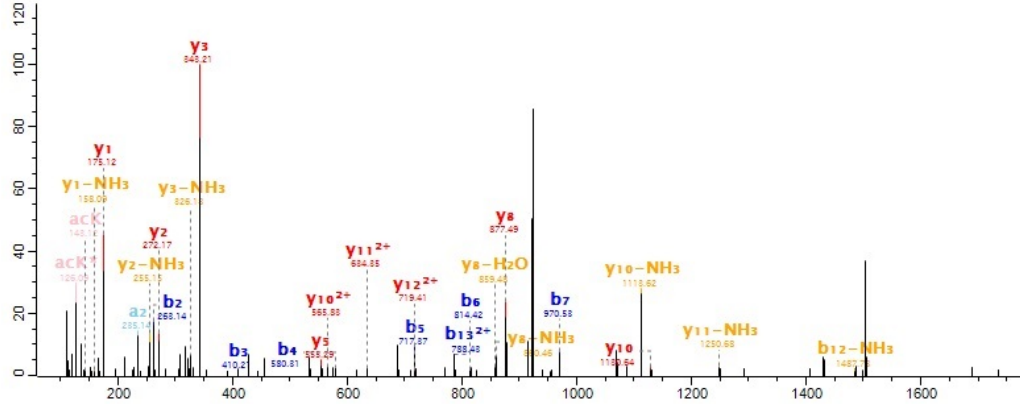

Q0D9D0-372:

Scan Method Score Mass  
3809 FTMS; HCD 99.01 1160.57

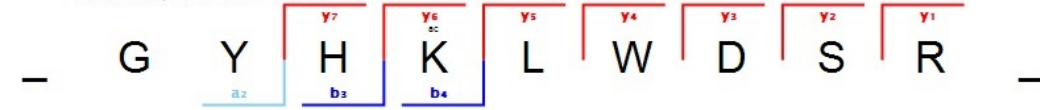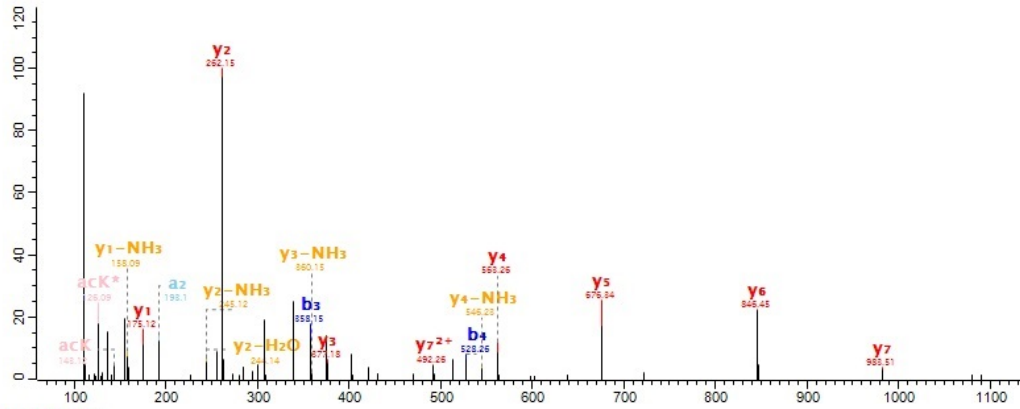

Q0D9D0-614:

Scan Method Score Mass  
3380 FTMS; HCD 112.94 1427.59

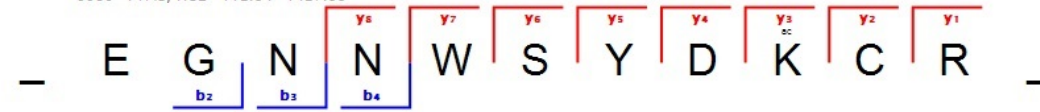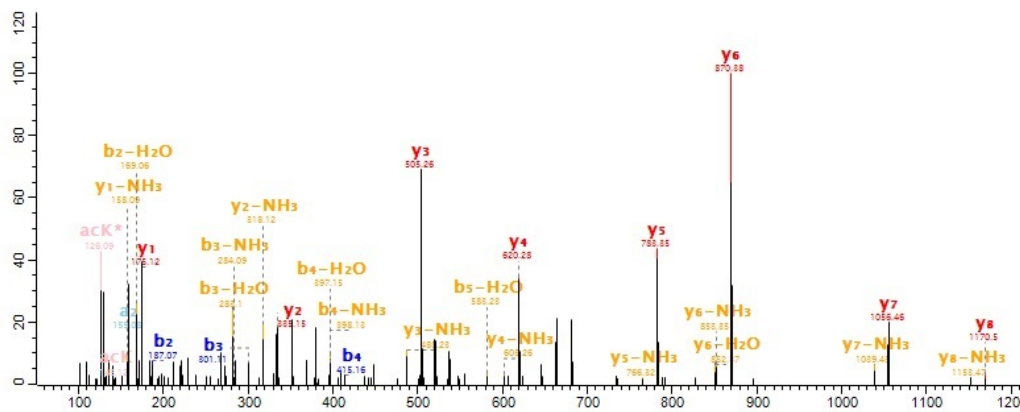

Q0D9D0-662:

Scan Method Score Mass  
1453 FTMS; HCD 78.32 1305.62

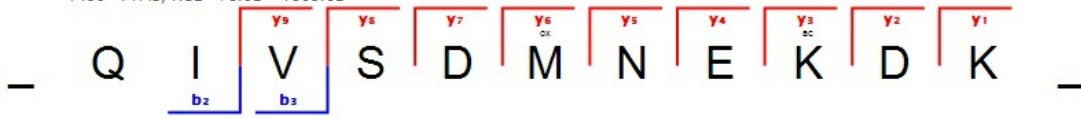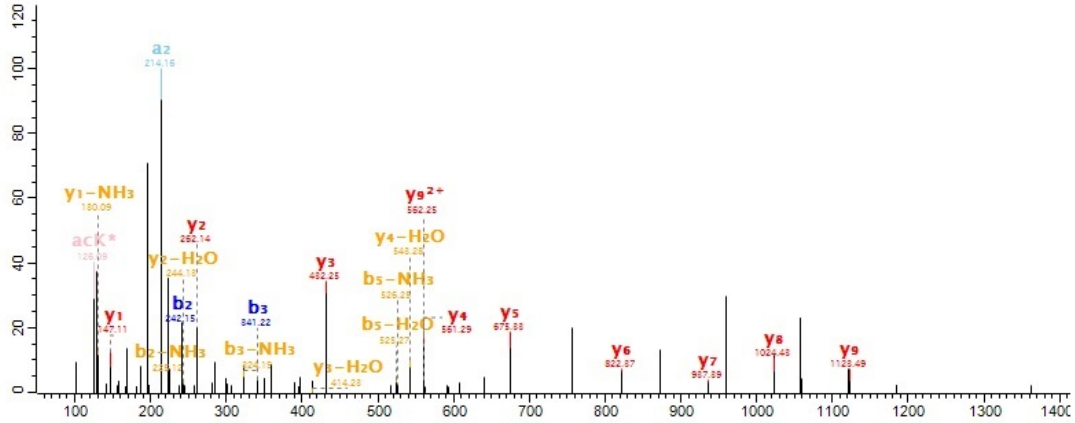

Q0D9D0-697:

Scan Method Score Mass  
3378 FTMS; HCD 114.4 1163.58

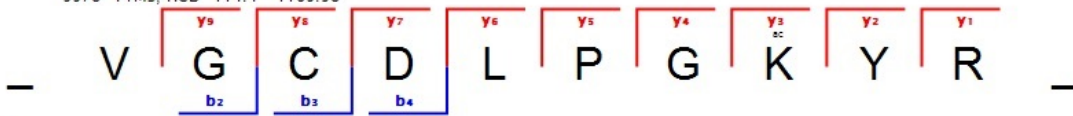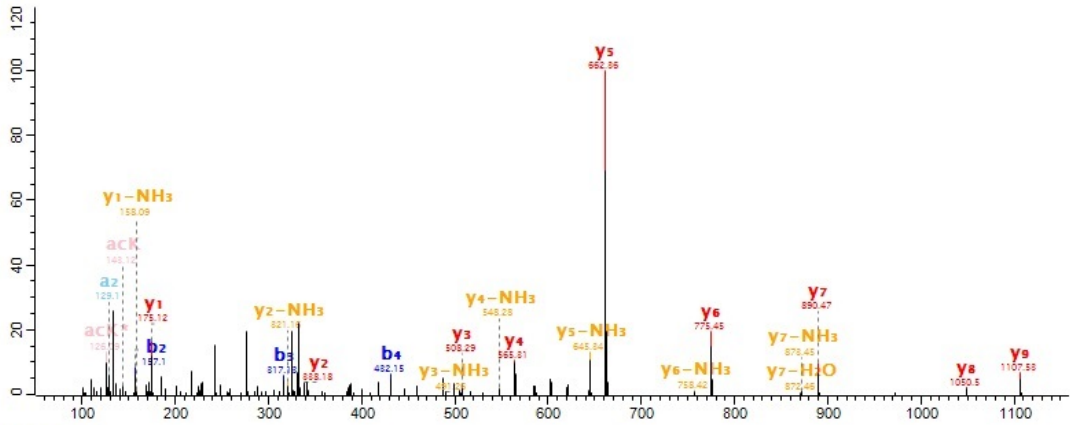

Q0D9D0-809:

Scan Method Score Mass  
4470 FTMS; HCD 90.99 883.47

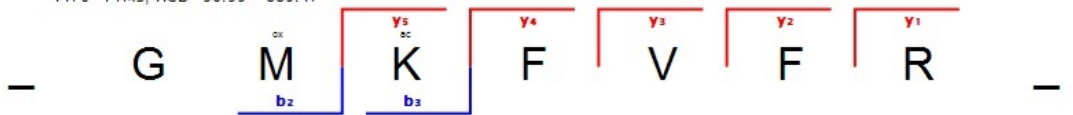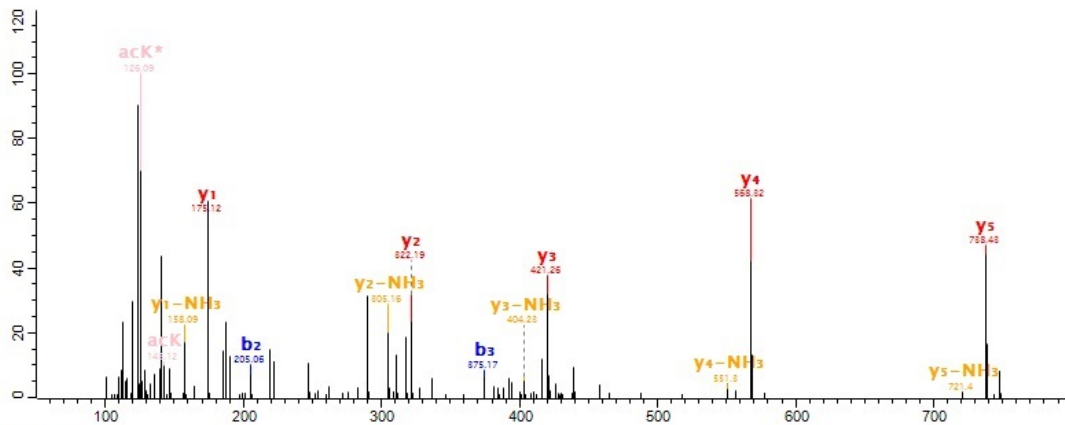

Q0DEV5-444:

Scan Method Score Mass  
2942 FTMS; HCD 106.38 904.57

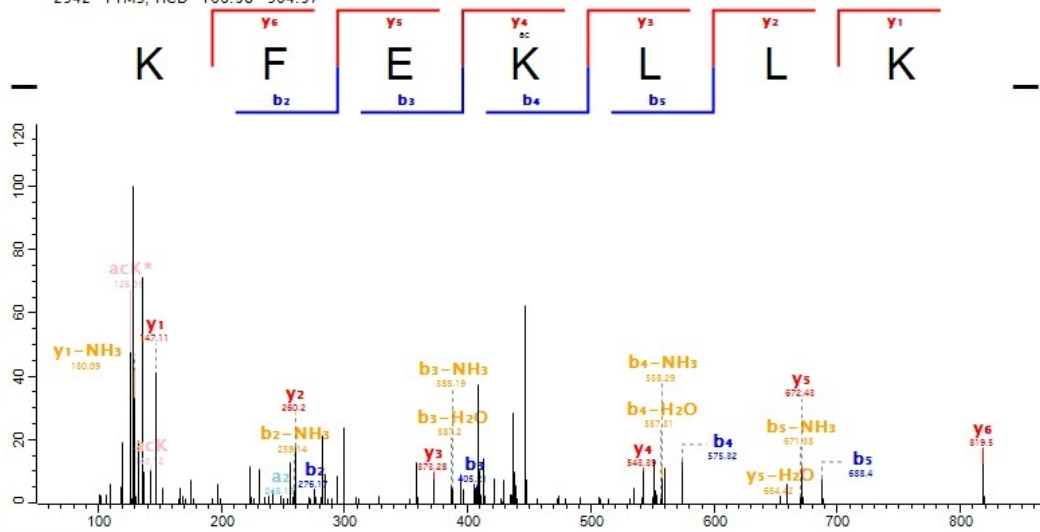

Q0DEV-452:

Scan Method Score Mass  
2379 FTMS; HCD 61.78 1067.5

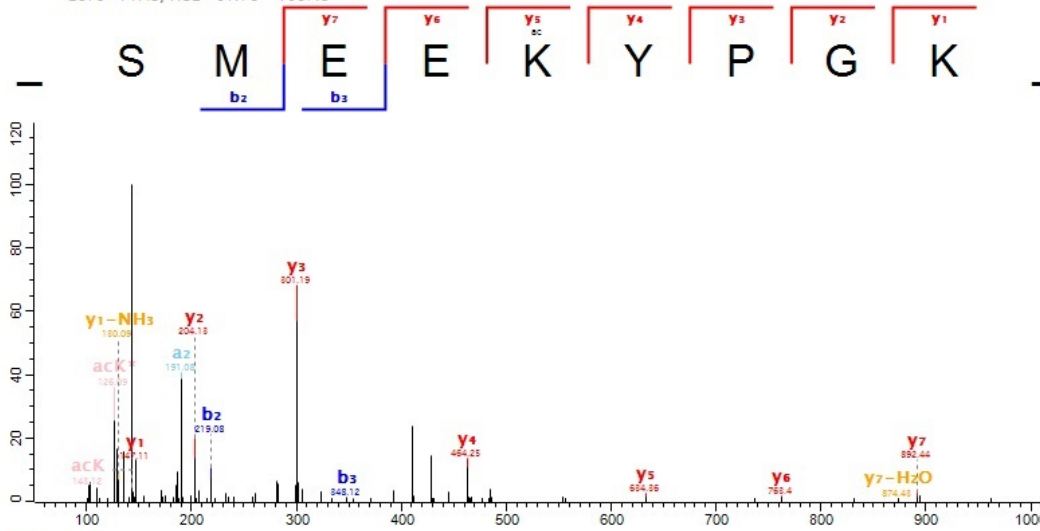

Q5VNT5-250:

Scan Method Score Mass  
6165 FTMS; HCD 72.9 1528.72

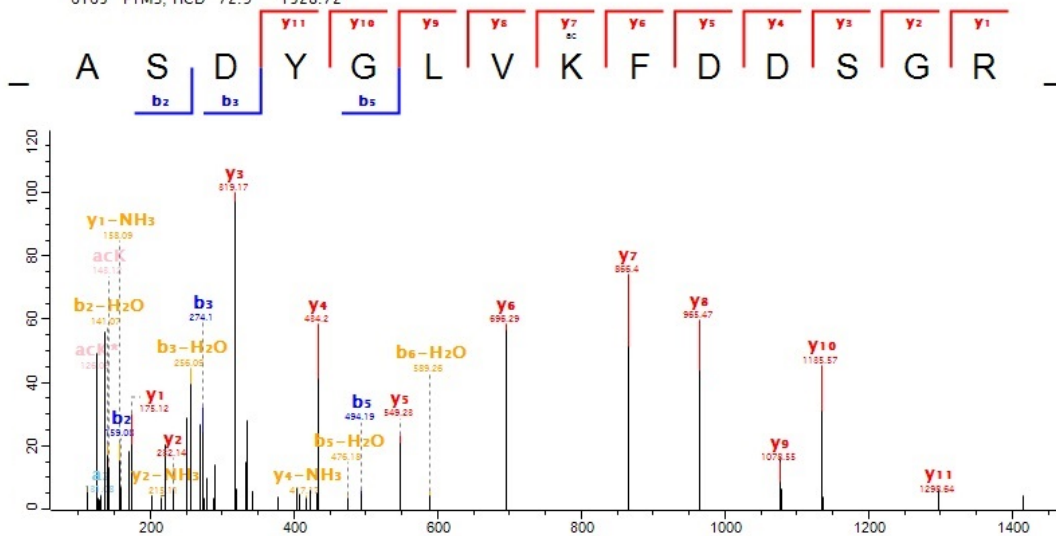

Q5VNT5-260:

Scan Method Score Mass  
3784 FTMS; HCD 56.92 1017.59

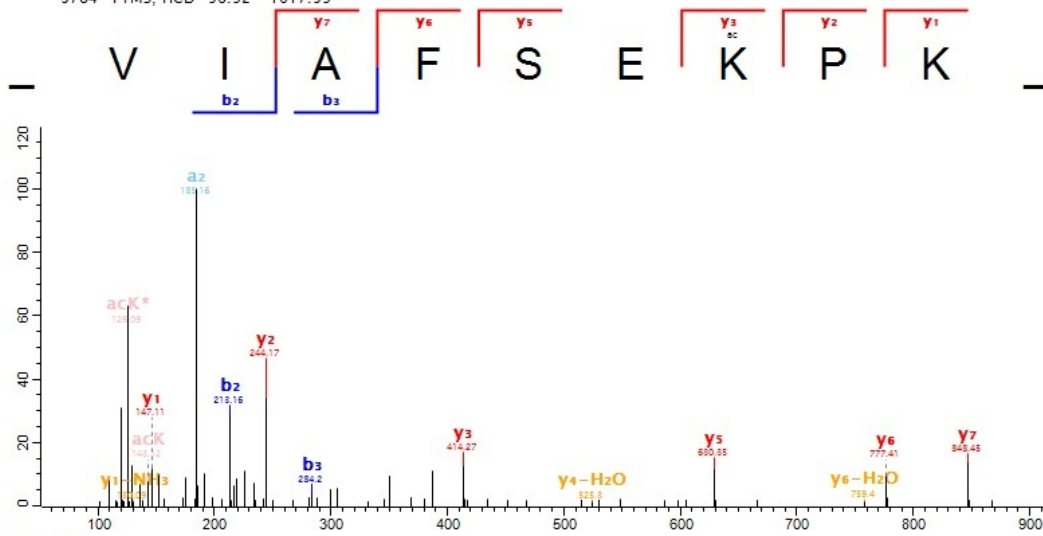

Q6H6P8-738:

Scan Method Score Mass  
4443 FTMS; HCD 89.23 1545.79

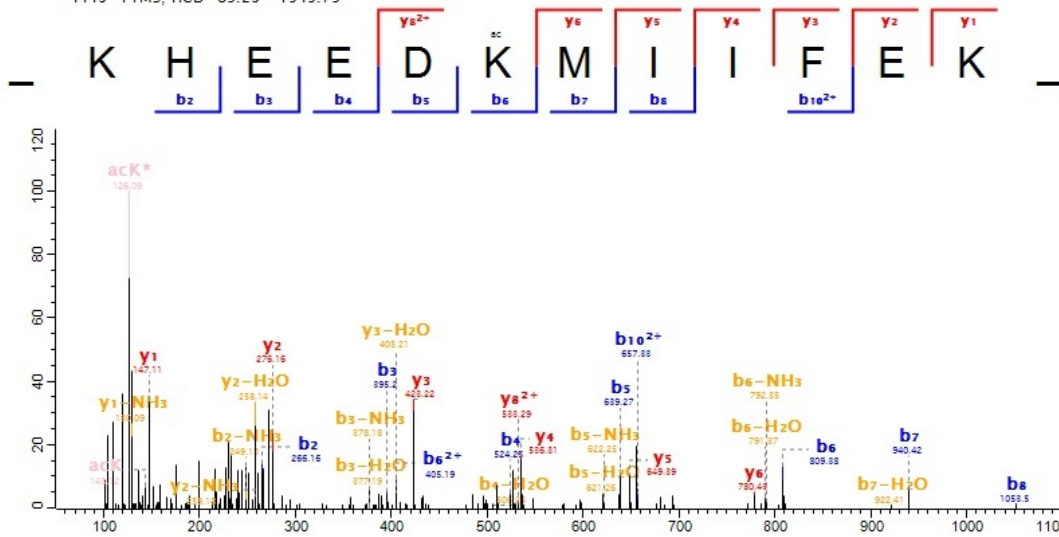

Q6H6P8-771:

Scan Method Score Mass  
1846 FTMS; HCD 69.91 1148.64

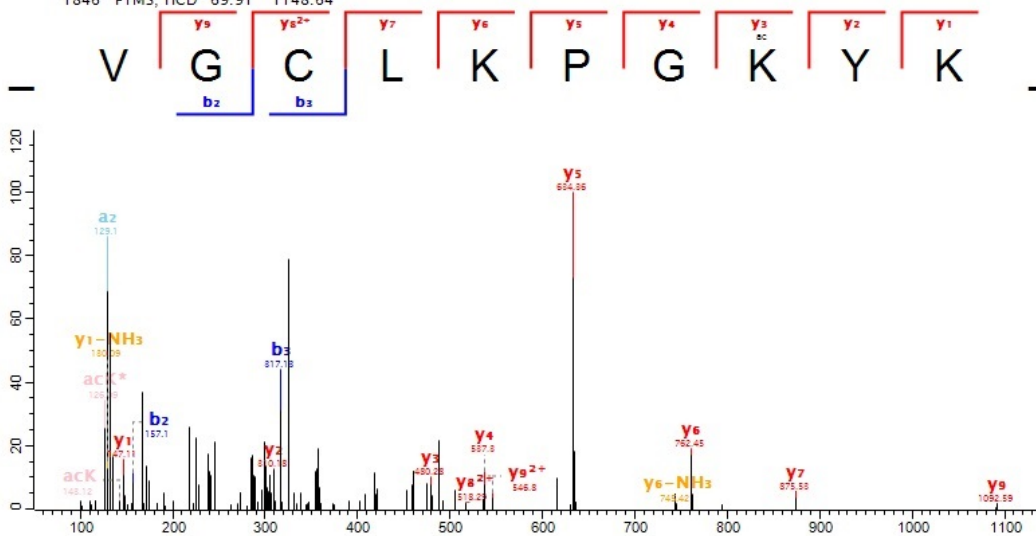

Q9AUV8-216:

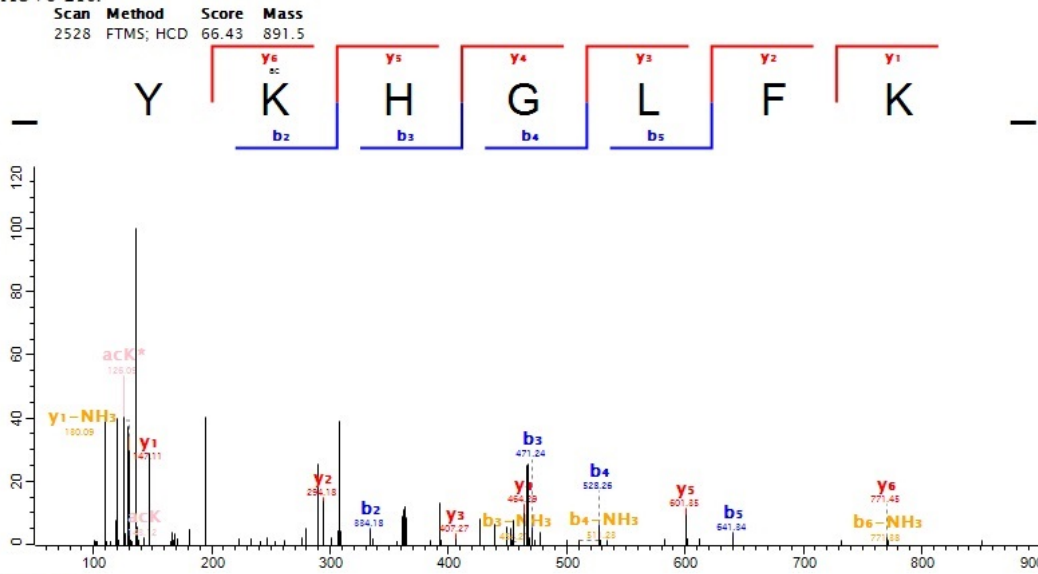

Q9AUV8-255:

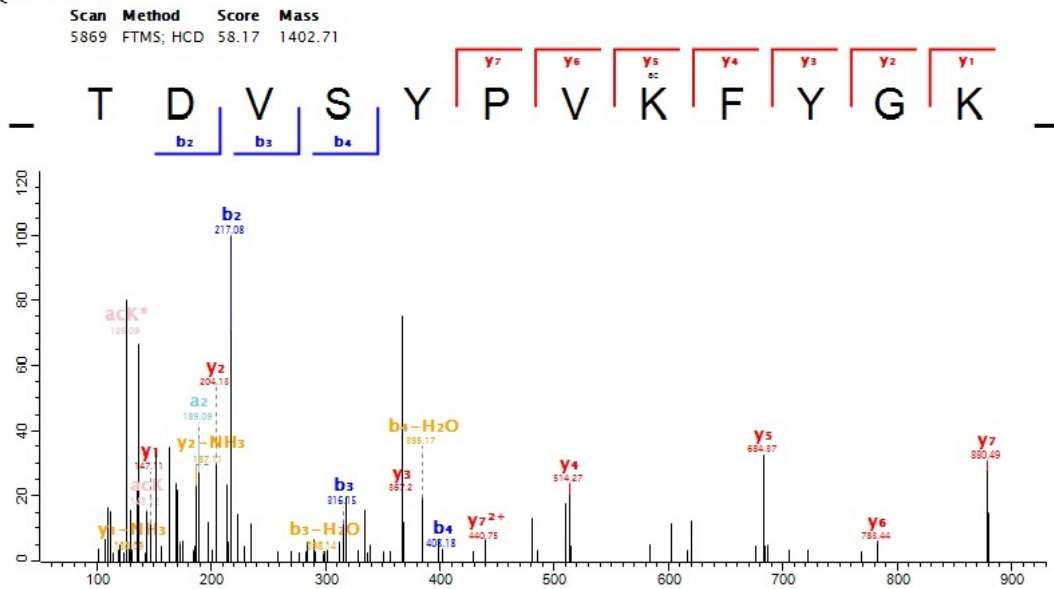

Q9AUV8-451:

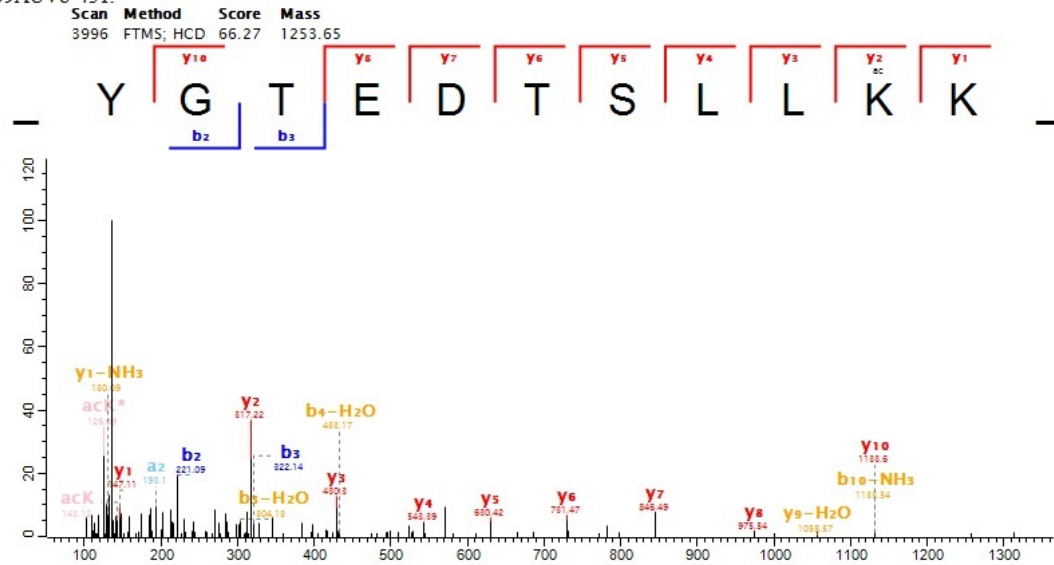

Q9AUV8-504:

Scan Method Score Mass  
5511 FTMS; HCD 47.64 1629.88

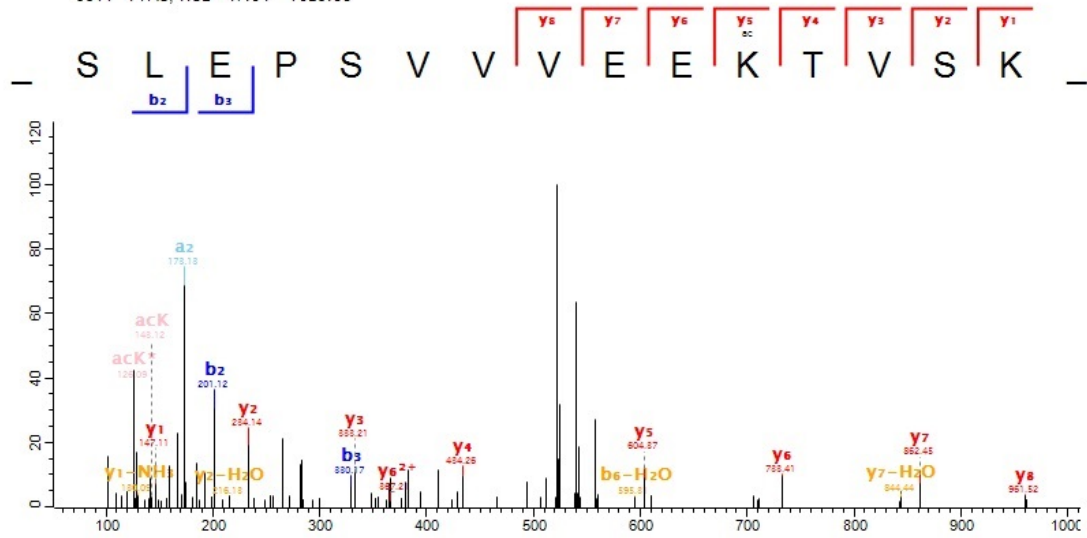

Q9AUV8-594:

Scan Method Score Mass  
2311 FTMS; HCD 93.35 1260.66

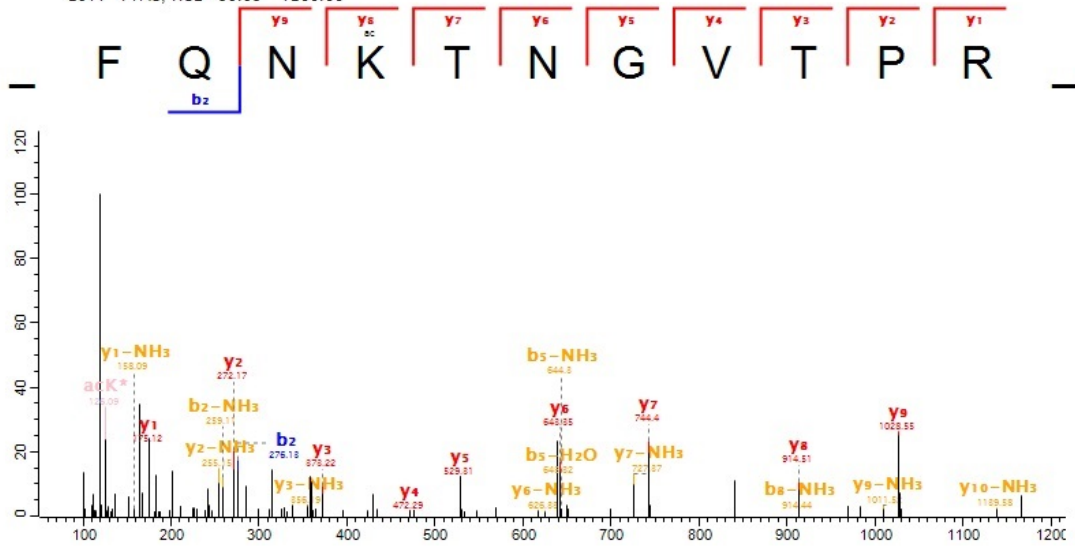

Q9AUV8-846:

Scan Method Score Mass  
3266 FTMS; HCD 63.62 1113.59

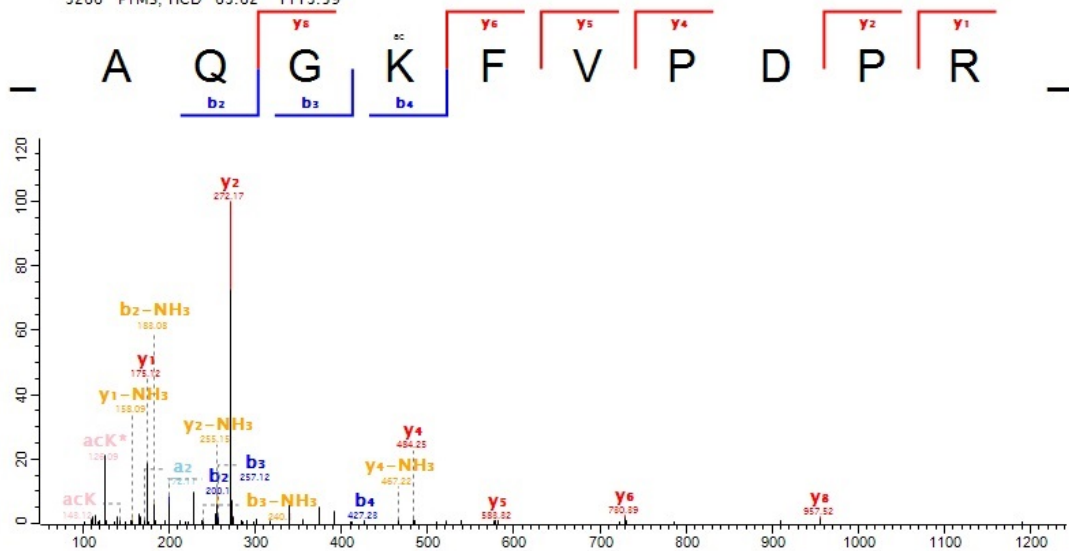



Q9AUV8-913:

Scan Method Score Mass  
3865 FTMS; HCD 122.74 945.5

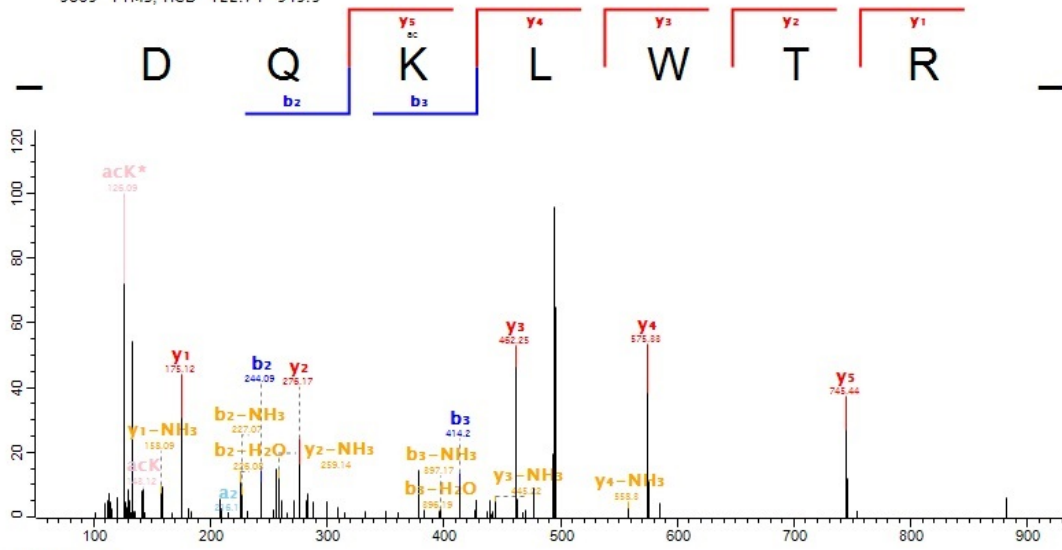

Q9AUV8-928:

Scan Method Score Mass  
5087 FTMS; HCD 96.21 1756.84

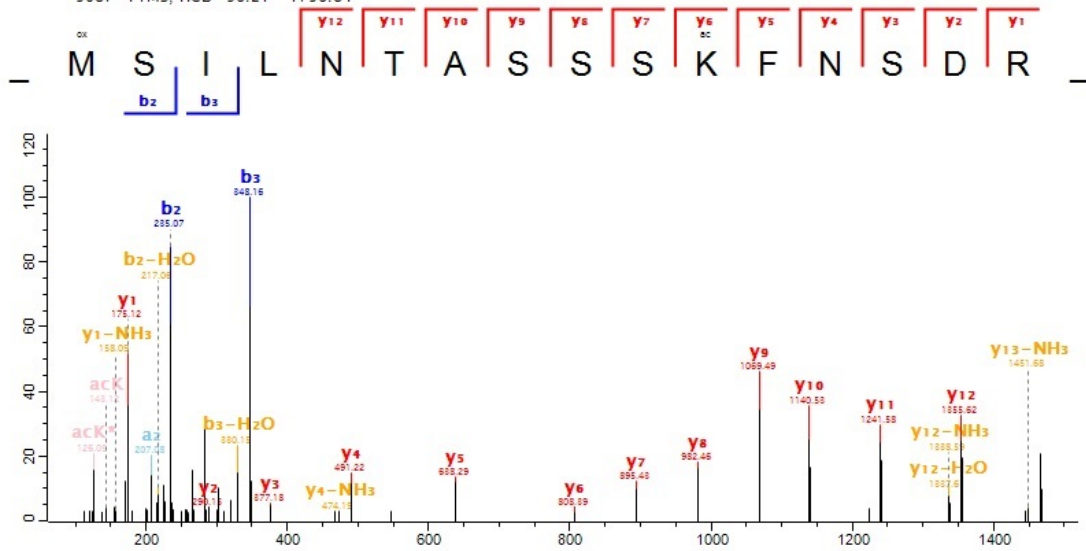

Supplement: pone.0168467.s001.pdf [file pone.0168467.s001.pdf]
