# Supplementary material for: Proteome Profile of Starch Granules Purified from Rice (Oryza sativa) Endosperm
Source: PLoS One. 2016 Dec 19;11(12):e0168467. doi: 10.1371/journal.pone.0168467 (PMC5167393; doi:10.1371/journal.pone.0168467)
Supplement: S1 Table — (XLS) [file pone.0168467.s002.xls]

## Sheet: A1
prot_acc	prot_desc	prot_mass	prot_cover	prot_pi	pep_delta	pep_query	pep_score	pep_seq
Q0DEV5	Granule-bound starch synthase 1, chloroplastic/amyloplastic OS=Oryza sativa subsp. japonica GN=WAXY PE=1 SV=1	67004	53.5	8.34	-0.0004	114	20.07	INWMK
Q0DEV5	Granule-bound starch synthase 1, chloroplastic/amyloplastic OS=Oryza sativa subsp. japonica GN=WAXY PE=1 SV=1	67004	53.5	8.34	-0.0001	119	20.82	INWMK
Q0DEV5	Granule-bound starch synthase 1, chloroplastic/amyloplastic OS=Oryza sativa subsp. japonica GN=WAXY PE=1 SV=1	67004	53.5	8.34	-0.0006	218	26.45	LSVDCK
Q0DEV5	Granule-bound starch synthase 1, chloroplastic/amyloplastic OS=Oryza sativa subsp. japonica GN=WAXY PE=1 SV=1	67004	53.5	8.34	-0.0004	219	42.6	LSVDCK
Q0DEV5	Granule-bound starch synthase 1, chloroplastic/amyloplastic OS=Oryza sativa subsp. japonica GN=WAXY PE=1 SV=1	67004	53.5	8.34	-0.0003	220	43.06	LSVDCK
Q0DEV5	Granule-bound starch synthase 1, chloroplastic/amyloplastic OS=Oryza sativa subsp. japonica GN=WAXY PE=1 SV=1	67004	53.5	8.34	-0.0003	221	48.21	LSVDCK
Q0DEV5	Granule-bound starch synthase 1, chloroplastic/amyloplastic OS=Oryza sativa subsp. japonica GN=WAXY PE=1 SV=1	67004	53.5	8.34	-0.0003	222	27.46	LSVDCK
Q0DEV5	Granule-bound starch synthase 1, chloroplastic/amyloplastic OS=Oryza sativa subsp. japonica GN=WAXY PE=1 SV=1	67004	53.5	8.34	-0.0002	223	43.26	LSVDCK
Q0DEV5	Granule-bound starch synthase 1, chloroplastic/amyloplastic OS=Oryza sativa subsp. japonica GN=WAXY PE=1 SV=1	67004	53.5	8.34	-0.0001	224	43.28	LSVDCK
Q0DEV5	Granule-bound starch synthase 1, chloroplastic/amyloplastic OS=Oryza sativa subsp. japonica GN=WAXY PE=1 SV=1	67004	53.5	8.34	0.0001	225	43.39	LSVDCK
Q0DEV5	Granule-bound starch synthase 1, chloroplastic/amyloplastic OS=Oryza sativa subsp. japonica GN=WAXY PE=1 SV=1	67004	53.5	8.34	0.0001	226	48.81	LSVDCK
Q0DEV5	Granule-bound starch synthase 1, chloroplastic/amyloplastic OS=Oryza sativa subsp. japonica GN=WAXY PE=1 SV=1	67004	53.5	8.34	-0.0009	320	42.17	KVAATLK
Q0DEV5	Granule-bound starch synthase 1, chloroplastic/amyloplastic OS=Oryza sativa subsp. japonica GN=WAXY PE=1 SV=1	67004	53.5	8.34	0	321	21.68	KVAATLK
Q0DEV5	Granule-bound starch synthase 1, chloroplastic/amyloplastic OS=Oryza sativa subsp. japonica GN=WAXY PE=1 SV=1	67004	53.5	8.34	-0.0003	563	49.33	VAATLKR
Q0DEV5	Granule-bound starch synthase 1, chloroplastic/amyloplastic OS=Oryza sativa subsp. japonica GN=WAXY PE=1 SV=1	67004	53.5	8.34	-0.0001	564	53.23	VAATLKR
Q0DEV5	Granule-bound starch synthase 1, chloroplastic/amyloplastic OS=Oryza sativa subsp. japonica GN=WAXY PE=1 SV=1	67004	53.5	8.34	0	565	49.77	VAATLKR
Q0DEV5	Granule-bound starch synthase 1, chloroplastic/amyloplastic OS=Oryza sativa subsp. japonica GN=WAXY PE=1 SV=1	67004	53.5	8.34	0.0001	566	45.87	VAATLKR
Q0DEV5	Granule-bound starch synthase 1, chloroplastic/amyloplastic OS=Oryza sativa subsp. japonica GN=WAXY PE=1 SV=1	67004	53.5	8.34	0.0004	567	42.08	VAATLKR
Q0DEV5	Granule-bound starch synthase 1, chloroplastic/amyloplastic OS=Oryza sativa subsp. japonica GN=WAXY PE=1 SV=1	67004	53.5	8.34	-0.0002	1140	34.41	VMVISPR
Q0DEV5	Granule-bound starch synthase 1, chloroplastic/amyloplastic OS=Oryza sativa subsp. japonica GN=WAXY PE=1 SV=1	67004	53.5	8.34	-0.0002	1141	51.42	VMVISPR
Q0DEV5	Granule-bound starch synthase 1, chloroplastic/amyloplastic OS=Oryza sativa subsp. japonica GN=WAXY PE=1 SV=1	67004	53.5	8.34	-0.0001	1142	43.48	VMVISPR
Q0DEV5	Granule-bound starch synthase 1, chloroplastic/amyloplastic OS=Oryza sativa subsp. japonica GN=WAXY PE=1 SV=1	67004	53.5	8.34	-0.0001	1143	51.87	VMVISPR
Q0DEV5	Granule-bound starch synthase 1, chloroplastic/amyloplastic OS=Oryza sativa subsp. japonica GN=WAXY PE=1 SV=1	67004	53.5	8.34	-0.0001	1144	36.79	VMVISPR
Q0DEV5	Granule-bound starch synthase 1, chloroplastic/amyloplastic OS=Oryza sativa subsp. japonica GN=WAXY PE=1 SV=1	67004	53.5	8.34	0	1145	54.41	VMVISPR
Q0DEV5	Granule-bound starch synthase 1, chloroplastic/amyloplastic OS=Oryza sativa subsp. japonica GN=WAXY PE=1 SV=1	67004	53.5	8.34	0.0001	1146	52.28	VMVISPR
Q0DEV5	Granule-bound starch synthase 1, chloroplastic/amyloplastic OS=Oryza sativa subsp. japonica GN=WAXY PE=1 SV=1	67004	53.5	8.34	0.0001	1147	51.22	VMVISPR
Q0DEV5	Granule-bound starch synthase 1, chloroplastic/amyloplastic OS=Oryza sativa subsp. japonica GN=WAXY PE=1 SV=1	67004	53.5	8.34	0.0001	1148	34.04	VMVISPR
Q0DEV5	Granule-bound starch synthase 1, chloroplastic/amyloplastic OS=Oryza sativa subsp. japonica GN=WAXY PE=1 SV=1	67004	53.5	8.34	0.0001	1149	54.74	VMVISPR
Q0DEV5	Granule-bound starch synthase 1, chloroplastic/amyloplastic OS=Oryza sativa subsp. japonica GN=WAXY PE=1 SV=1	67004	53.5	8.34	0.0001	1150	49.94	VMVISPR
Q0DEV5	Granule-bound starch synthase 1, chloroplastic/amyloplastic OS=Oryza sativa subsp. japonica GN=WAXY PE=1 SV=1	67004	53.5	8.34	0.0001	1151	47.59	VMVISPR
Q0DEV5	Granule-bound starch synthase 1, chloroplastic/amyloplastic OS=Oryza sativa subsp. japonica GN=WAXY PE=1 SV=1	67004	53.5	8.34	0.0001	1152	48.22	VMVISPR
Q0DEV5	Granule-bound starch synthase 1, chloroplastic/amyloplastic OS=Oryza sativa subsp. japonica GN=WAXY PE=1 SV=1	67004	53.5	8.34	0.0001	1153	47.38	VMVISPR
Q0DEV5	Granule-bound starch synthase 1, chloroplastic/amyloplastic OS=Oryza sativa subsp. japonica GN=WAXY PE=1 SV=1	67004	53.5	8.34	0.0002	1154	41.13	VMVISPR
Q0DEV5	Granule-bound starch synthase 1, chloroplastic/amyloplastic OS=Oryza sativa subsp. japonica GN=WAXY PE=1 SV=1	67004	53.5	8.34	0.0002	1155	44.92	VMVISPR
Q0DEV5	Granule-bound starch synthase 1, chloroplastic/amyloplastic OS=Oryza sativa subsp. japonica GN=WAXY PE=1 SV=1	67004	53.5	8.34	0.0003	1156	37.91	VMVISPR
Q0DEV5	Granule-bound starch synthase 1, chloroplastic/amyloplastic OS=Oryza sativa subsp. japonica GN=WAXY PE=1 SV=1	67004	53.5	8.34	0.0003	1157	40.84	VMVISPR
Q0DEV5	Granule-bound starch synthase 1, chloroplastic/amyloplastic OS=Oryza sativa subsp. japonica GN=WAXY PE=1 SV=1	67004	53.5	8.34	0.0003	1158	39.58	VMVISPR
Q0DEV5	Granule-bound starch synthase 1, chloroplastic/amyloplastic OS=Oryza sativa subsp. japonica GN=WAXY PE=1 SV=1	67004	53.5	8.34	0.0003	1159	50.19	VMVISPR
Q0DEV5	Granule-bound starch synthase 1, chloroplastic/amyloplastic OS=Oryza sativa subsp. japonica GN=WAXY PE=1 SV=1	67004	53.5	8.34	0.0003	1160	28.99	VMVISPR
Q0DEV5	Granule-bound starch synthase 1, chloroplastic/amyloplastic OS=Oryza sativa subsp. japonica GN=WAXY PE=1 SV=1	67004	53.5	8.34	0.0003	1161	52.11	VMVISPR
Q0DEV5	Granule-bound starch synthase 1, chloroplastic/amyloplastic OS=Oryza sativa subsp. japonica GN=WAXY PE=1 SV=1	67004	53.5	8.34	0.0003	1162	46.66	VMVISPR
Q0DEV5	Granule-bound starch synthase 1, chloroplastic/amyloplastic OS=Oryza sativa subsp. japonica GN=WAXY PE=1 SV=1	67004	53.5	8.34	0.0003	1163	52.02	VMVISPR
Q0DEV5	Granule-bound starch synthase 1, chloroplastic/amyloplastic OS=Oryza sativa subsp. japonica GN=WAXY PE=1 SV=1	67004	53.5	8.34	0.0003	1164	49.95	VMVISPR
Q0DEV5	Granule-bound starch synthase 1, chloroplastic/amyloplastic OS=Oryza sativa subsp. japonica GN=WAXY PE=1 SV=1	67004	53.5	8.34	0.0004	1165	49.65	VMVISPR
Q0DEV5	Granule-bound starch synthase 1, chloroplastic/amyloplastic OS=Oryza sativa subsp. japonica GN=WAXY PE=1 SV=1	67004	53.5	8.34	0.0004	1166	46.73	VMVISPR
Q0DEV5	Granule-bound starch synthase 1, chloroplastic/amyloplastic OS=Oryza sativa subsp. japonica GN=WAXY PE=1 SV=1	67004	53.5	8.34	0.0005	1167	52.36	VMVISPR
Q0DEV5	Granule-bound starch synthase 1, chloroplastic/amyloplastic OS=Oryza sativa subsp. japonica GN=WAXY PE=1 SV=1	67004	53.5	8.34	0.0006	1168	44.54	VMVISPR
Q0DEV5	Granule-bound starch synthase 1, chloroplastic/amyloplastic OS=Oryza sativa subsp. japonica GN=WAXY PE=1 SV=1	67004	53.5	8.34	0.0006	1169	49.72	VMVISPR
Q0DEV5	Granule-bound starch synthase 1, chloroplastic/amyloplastic OS=Oryza sativa subsp. japonica GN=WAXY PE=1 SV=1	67004	53.5	8.34	0.0006	1170	44.57	VMVISPR
Q0DEV5	Granule-bound starch synthase 1, chloroplastic/amyloplastic OS=Oryza sativa subsp. japonica GN=WAXY PE=1 SV=1	67004	53.5	8.34	-0.0008	1212	42.54	TGFHMGR
Q0DEV5	Granule-bound starch synthase 1, chloroplastic/amyloplastic OS=Oryza sativa subsp. japonica GN=WAXY PE=1 SV=1	67004	53.5	8.34	0.0002	1213	29.21	TGFHMGR
Q0DEV5	Granule-bound starch synthase 1, chloroplastic/amyloplastic OS=Oryza sativa subsp. japonica GN=WAXY PE=1 SV=1	67004	53.5	8.34	0.0011	1214	28.96	TGFHMGR
Q0DEV5	Granule-bound starch synthase 1, chloroplastic/amyloplastic OS=Oryza sativa subsp. japonica GN=WAXY PE=1 SV=1	67004	53.5	8.34	-0.0027	1402	39.72	VMVISPR
Q0DEV5	Granule-bound starch synthase 1, chloroplastic/amyloplastic OS=Oryza sativa subsp. japonica GN=WAXY PE=1 SV=1	67004	53.5	8.34	-0.0022	1403	41.94	VMVISPR
Q0DEV5	Granule-bound starch synthase 1, chloroplastic/amyloplastic OS=Oryza sativa subsp. japonica GN=WAXY PE=1 SV=1	67004	53.5	8.34	-0.0015	1404	42.1	VMVISPR
Q0DEV5	Granule-bound starch synthase 1, chloroplastic/amyloplastic OS=Oryza sativa subsp. japonica GN=WAXY PE=1 SV=1	67004	53.5	8.34	-0.0013	1405	41.3	VMVISPR
Q0DEV5	Granule-bound starch synthase 1, chloroplastic/amyloplastic OS=Oryza sativa subsp. japonica GN=WAXY PE=1 SV=1	67004	53.5	8.34	-0.0011	1406	42.57	VMVISPR
Q0DEV5	Granule-bound starch synthase 1, chloroplastic/amyloplastic OS=Oryza sativa subsp. japonica GN=WAXY PE=1 SV=1	67004	53.5	8.34	-0.0011	1407	31.58	VMVISPR
Q0DEV5	Granule-bound starch synthase 1, chloroplastic/amyloplastic OS=Oryza sativa subsp. japonica GN=WAXY PE=1 SV=1	67004	53.5	8.34	-0.001	1408	37.14	VMVISPR
Q0DEV5	Granule-bound starch synthase 1, chloroplastic/amyloplastic OS=Oryza sativa subsp. japonica GN=WAXY PE=1 SV=1	67004	53.5	8.34	-0.001	1410	29.08	VMVISPR
Q0DEV5	Granule-bound starch synthase 1, chloroplastic/amyloplastic OS=Oryza sativa subsp. japonica GN=WAXY PE=1 SV=1	67004	53.5	8.34	-0.001	1411	32.56	VMVISPR
Q0DEV5	Granule-bound starch synthase 1, chloroplastic/amyloplastic OS=Oryza sativa subsp. japonica GN=WAXY PE=1 SV=1	67004	53.5	8.34	-0.0009	1412	39.85	VMVISPR
Q0DEV5	Granule-bound starch synthase 1, chloroplastic/amyloplastic OS=Oryza sativa subsp. japonica GN=WAXY PE=1 SV=1	67004	53.5	8.34	-0.0008	1413	37.34	VMVISPR
Q0DEV5	Granule-bound starch synthase 1, chloroplastic/amyloplastic OS=Oryza sativa subsp. japonica GN=WAXY PE=1 SV=1	67004	53.5	8.34	-0.0007	1414	27.8	VMVISPR
Q0DEV5	Granule-bound starch synthase 1, chloroplastic/amyloplastic OS=Oryza sativa subsp. japonica GN=WAXY PE=1 SV=1	67004	53.5	8.34	-0.0006	1415	41.74	VMVISPR
Q0DEV5	Granule-bound starch synthase 1, chloroplastic/amyloplastic OS=Oryza sativa subsp. japonica GN=WAXY PE=1 SV=1	67004	53.5	8.34	-0.0006	1416	27.82	VMVISPR
Q0DEV5	Granule-bound starch synthase 1, chloroplastic/amyloplastic OS=Oryza sativa subsp. japonica GN=WAXY PE=1 SV=1	67004	53.5	8.34	-0.0006	1417	26.05	VMVISPR
Q0DEV5	Granule-bound starch synthase 1, chloroplastic/amyloplastic OS=Oryza sativa subsp. japonica GN=WAXY PE=1 SV=1	67004	53.5	8.34	-0.0006	1418	29.94	VMVISPR
Q0DEV5	Granule-bound starch synthase 1, chloroplastic/amyloplastic OS=Oryza sativa subsp. japonica GN=WAXY PE=1 SV=1	67004	53.5	8.34	-0.0006	1419	25.99	VMVISPR
Q0DEV5	Granule-bound starch synthase 1, chloroplastic/amyloplastic OS=Oryza sativa subsp. japonica GN=WAXY PE=1 SV=1	67004	53.5	8.34	-0.0006	1420	23.9	VMVISPR
Q0DEV5	Granule-bound starch synthase 1, chloroplastic/amyloplastic OS=Oryza sativa subsp. japonica GN=WAXY PE=1 SV=1	67004	53.5	8.34	-0.0005	1421	39.79	VMVISPR
Q0DEV5	Granule-bound starch synthase 1, chloroplastic/amyloplastic OS=Oryza sativa subsp. japonica GN=WAXY PE=1 SV=1	67004	53.5	8.34	-0.0005	1422	34.8	VMVISPR
Q0DEV5	Granule-bound starch synthase 1, chloroplastic/amyloplastic OS=Oryza sativa subsp. japonica GN=WAXY PE=1 SV=1	67004	53.5	8.34	-0.0005	1423	34.95	VMVISPR
Q0DEV5	Granule-bound starch synthase 1, chloroplastic/amyloplastic OS=Oryza sativa subsp. japonica GN=WAXY PE=1 SV=1	67004	53.5	8.34	-0.0004	1424	32.43	VMVISPR
Q0DEV5	Granule-bound starch synthase 1, chloroplastic/amyloplastic OS=Oryza sativa subsp. japonica GN=WAXY PE=1 SV=1	67004	53.5	8.34	-0.0003	1425	31.95	VMVISPR
Q0DEV5	Granule-bound starch synthase 1, chloroplastic/amyloplastic OS=Oryza sativa subsp. japonica GN=WAXY PE=1 SV=1	67004	53.5	8.34	-0.0003	1426	42.99	VMVISPR
Q0DEV5	Granule-bound starch synthase 1, chloroplastic/amyloplastic OS=Oryza sativa subsp. japonica GN=WAXY PE=1 SV=1	67004	53.5	8.34	-0.0003	1427	46.52	VMVISPR
Q0DEV5	Granule-bound starch synthase 1, chloroplastic/amyloplastic OS=Oryza sativa subsp. japonica GN=WAXY PE=1 SV=1	67004	53.5	8.34	-0.0003	1428	25.4	VMVISPR
Q0DEV5	Granule-bound starch synthase 1, chloroplastic/amyloplastic OS=Oryza sativa subsp. japonica GN=WAXY PE=1 SV=1	67004	53.5	8.34	-0.0003	1429	44.32	VMVISPR
Q0DEV5	Granule-bound starch synthase 1, chloroplastic/amyloplastic OS=Oryza sativa subsp. japonica GN=WAXY PE=1 SV=1	67004	53.5	8.34	-0.0003	1430	39.61	VMVISPR
Q0DEV5	Granule-bound starch synthase 1, chloroplastic/amyloplastic OS=Oryza sativa subsp. japonica GN=WAXY PE=1 SV=1	67004	53.5	8.34	-0.0003	1431	29.52	VMVISPR
Q0DEV5	Granule-bound starch synthase 1, chloroplastic/amyloplastic OS=Oryza sativa subsp. japonica GN=WAXY PE=1 SV=1	67004	53.5	8.34	-0.0003	1432	42.52	VMVISPR
Q0DEV5	Granule-bound starch synthase 1, chloroplastic/amyloplastic OS=Oryza sativa subsp. japonica GN=WAXY PE=1 SV=1	67004	53.5	8.34	-0.0003	1433	42.09	VMVISPR
Q0DEV5	Granule-bound starch synthase 1, chloroplastic/amyloplastic OS=Oryza sativa subsp. japonica GN=WAXY PE=1 SV=1	67004	53.5	8.34	-0.0003	1434	42.98	VMVISPR
Q0DEV5	Granule-bound starch synthase 1, chloroplastic/amyloplastic OS=Oryza sativa subsp. japonica GN=WAXY PE=1 SV=1	67004	53.5	8.34	-0.0003	1435	36.28	VMVISPR
Q0DEV5	Granule-bound starch synthase 1, chloroplastic/amyloplastic OS=Oryza sativa subsp. japonica GN=WAXY PE=1 SV=1	67004	53.5	8.34	-0.0003	1436	32.31	VMVISPR
Q0DEV5	Granule-bound starch synthase 1, chloroplastic/amyloplastic OS=Oryza sativa subsp. japonica GN=WAXY PE=1 SV=1	67004	53.5	8.34	-0.0002	1437	39.2	VMVISPR
Q0DEV5	Granule-bound starch synthase 1, chloroplastic/amyloplastic OS=Oryza sativa subsp. japonica GN=WAXY PE=1 SV=1	67004	53.5	8.34	-0.0002	1438	37.94	VMVISPR
Q0DEV5	Granule-bound starch synthase 1, chloroplastic/amyloplastic OS=Oryza sativa subsp. japonica GN=WAXY PE=1 SV=1	67004	53.5	8.34	-0.0002	1439	42.75	VMVISPR
Q0DEV5	Granule-bound starch synthase 1, chloroplastic/amyloplastic OS=Oryza sativa subsp. japonica GN=WAXY PE=1 SV=1	67004	53.5	8.34	-0.0002	1440	38.13	VMVISPR
Q0DEV5	Granule-bound starch synthase 1, chloroplastic/amyloplastic OS=Oryza sativa subsp. japonica GN=WAXY PE=1 SV=1	67004	53.5	8.34	-0.0002	1442	24.91	VMVISPR
Q0DEV5	Granule-bound starch synthase 1, chloroplastic/amyloplastic OS=Oryza sativa subsp. japonica GN=WAXY PE=1 SV=1	67004	53.5	8.34	-0.0002	1443	31.59	VMVISPR
Q0DEV5	Granule-bound starch synthase 1, chloroplastic/amyloplastic OS=Oryza sativa subsp. japonica GN=WAXY PE=1 SV=1	67004	53.5	8.34	-0.0002	1444	41.59	VMVISPR
Q0DEV5	Granule-bound starch synthase 1, chloroplastic/amyloplastic OS=Oryza sativa subsp. japonica GN=WAXY PE=1 SV=1	67004	53.5	8.34	-0.0002	1445	44.17	VMVISPR
Q0DEV5	Granule-bound starch synthase 1, chloroplastic/amyloplastic OS=Oryza sativa subsp. japonica GN=WAXY PE=1 SV=1	67004	53.5	8.34	-0.0002	1446	41.73	VMVISPR
Q0DEV5	Granule-bound starch synthase 1, chloroplastic/amyloplastic OS=Oryza sativa subsp. japonica GN=WAXY PE=1 SV=1	67004	53.5	8.34	-0.0002	1447	29.32	VMVISPR
Q0DEV5	Granule-bound starch synthase 1, chloroplastic/amyloplastic OS=Oryza sativa subsp. japonica GN=WAXY PE=1 SV=1	67004	53.5	8.34	-0.0002	1448	23.41	VMVISPR
Q0DEV5	Granule-bound starch synthase 1, chloroplastic/amyloplastic OS=Oryza sativa subsp. japonica GN=WAXY PE=1 SV=1	67004	53.5	8.34	-0.0001	1449	39.79	VMVISPR
Q0DEV5	Granule-bound starch synthase 1, chloroplastic/amyloplastic OS=Oryza sativa subsp. japonica GN=WAXY PE=1 SV=1	67004	53.5	8.34	-0.0001	1450	43.34	VMVISPR
Q0DEV5	Granule-bound starch synthase 1, chloroplastic/amyloplastic OS=Oryza sativa subsp. japonica GN=WAXY PE=1 SV=1	67004	53.5	8.34	-0.0001	1451	36.33	VMVISPR
Q0DEV5	Granule-bound starch synthase 1, chloroplastic/amyloplastic OS=Oryza sativa subsp. japonica GN=WAXY PE=1 SV=1	67004	53.5	8.34	-0.0001	1452	30.65	VMVISPR
Q0DEV5	Granule-bound starch synthase 1, chloroplastic/amyloplastic OS=Oryza sativa subsp. japonica GN=WAXY PE=1 SV=1	67004	53.5	8.34	-0.0001	1453	28.68	VMVISPR
Q0DEV5	Granule-bound starch synthase 1, chloroplastic/amyloplastic OS=Oryza sativa subsp. japonica GN=WAXY PE=1 SV=1	67004	53.5	8.34	-0.0001	1454	27.22	VMVISPR
Q0DEV5	Granule-bound starch synthase 1, chloroplastic/amyloplastic OS=Oryza sativa subsp. japonica GN=WAXY PE=1 SV=1	67004	53.5	8.34	-0.0001	1455	27.4	VMVISPR
Q0DEV5	Granule-bound starch synthase 1, chloroplastic/amyloplastic OS=Oryza sativa subsp. japonica GN=WAXY PE=1 SV=1	67004	53.5	8.34	0	1456	25.01	VMVISPR
Q0DEV5	Granule-bound starch synthase 1, chloroplastic/amyloplastic OS=Oryza sativa subsp. japonica GN=WAXY PE=1 SV=1	67004	53.5	8.34	0	1457	47.63	VMVISPR
Q0DEV5	Granule-bound starch synthase 1, chloroplastic/amyloplastic OS=Oryza sativa subsp. japonica GN=WAXY PE=1 SV=1	67004	53.5	8.34	0	1458	46.58	VMVISPR
Q0DEV5	Granule-bound starch synthase 1, chloroplastic/amyloplastic OS=Oryza sativa subsp. japonica GN=WAXY PE=1 SV=1	67004	53.5	8.34	0	1459	46.08	VMVISPR
Q0DEV5	Granule-bound starch synthase 1, chloroplastic/amyloplastic OS=Oryza sativa subsp. japonica GN=WAXY PE=1 SV=1	67004	53.5	8.34	0	1460	34.49	VMVISPR
Q0DEV5	Granule-bound starch synthase 1, chloroplastic/amyloplastic OS=Oryza sativa subsp. japonica GN=WAXY PE=1 SV=1	67004	53.5	8.34	0	1461	44.48	VMVISPR
Q0DEV5	Granule-bound starch synthase 1, chloroplastic/amyloplastic OS=Oryza sativa subsp. japonica GN=WAXY PE=1 SV=1	67004	53.5	8.34	0	1462	37.81	VMVISPR
Q0DEV5	Granule-bound starch synthase 1, chloroplastic/amyloplastic OS=Oryza sativa subsp. japonica GN=WAXY PE=1 SV=1	67004	53.5	8.34	0	1463	32.92	VMVISPR
Q0DEV5	Granule-bound starch synthase 1, chloroplastic/amyloplastic OS=Oryza sativa subsp. japonica GN=WAXY PE=1 SV=1	67004	53.5	8.34	0	1464	25.39	VMVISPR
Q0DEV5	Granule-bound starch synthase 1, chloroplastic/amyloplastic OS=Oryza sativa subsp. japonica GN=WAXY PE=1 SV=1	67004	53.5	8.34	0.0001	1465	43.86	VMVISPR
Q0DEV5	Granule-bound starch synthase 1, chloroplastic/amyloplastic OS=Oryza sativa subsp. japonica GN=WAXY PE=1 SV=1	67004	53.5	8.34	0.0001	1466	34.44	VMVISPR
Q0DEV5	Granule-bound starch synthase 1, chloroplastic/amyloplastic OS=Oryza sativa subsp. japonica GN=WAXY PE=1 SV=1	67004	53.5	8.34	0.0001	1467	22.49	VMVISPR
Q0DEV5	Granule-bound starch synthase 1, chloroplastic/amyloplastic OS=Oryza sativa subsp. japonica GN=WAXY PE=1 SV=1	67004	53.5	8.34	0.0001	1468	37.31	VMVISPR
Q0DEV5	Granule-bound starch synthase 1, chloroplastic/amyloplastic OS=Oryza sativa subsp. japonica GN=WAXY PE=1 SV=1	67004	53.5	8.34	0.0001	1469	27.32	VMVISPR
Q0DEV5	Granule-bound starch synthase 1, chloroplastic/amyloplastic OS=Oryza sativa subsp. japonica GN=WAXY PE=1 SV=1	67004	53.5	8.34	0.0001	1470	37.52	VMVISPR
Q0DEV5	Granule-bound starch synthase 1, chloroplastic/amyloplastic OS=Oryza sativa subsp. japonica GN=WAXY PE=1 SV=1	67004	53.5	8.34	0.0003	1471	40.24	VMVISPR
Q0DEV5	Granule-bound starch synthase 1, chloroplastic/amyloplastic OS=Oryza sativa subsp. japonica GN=WAXY PE=1 SV=1	67004	53.5	8.34	0.0003	1472	53.05	VMVISPR
Q0DEV5	Granule-bound starch synthase 1, chloroplastic/amyloplastic OS=Oryza sativa subsp. japonica GN=WAXY PE=1 SV=1	67004	53.5	8.34	0.0004	1474	26.53	VMVISPR
Q0DEV5	Granule-bound starch synthase 1, chloroplastic/amyloplastic OS=Oryza sativa subsp. japonica GN=WAXY PE=1 SV=1	67004	53.5	8.34	0.0004	1475	45.38	VMVISPR
Q0DEV5	Granule-bound starch synthase 1, chloroplastic/amyloplastic OS=Oryza sativa subsp. japonica GN=WAXY PE=1 SV=1	67004	53.5	8.34	0.0008	1476	28.61	VMVISPR
Q0DEV5	Granule-bound starch synthase 1, chloroplastic/amyloplastic OS=Oryza sativa subsp. japonica GN=WAXY PE=1 SV=1	67004	53.5	8.34	0.0008	1477	29.75	VMVISPR
Q0DEV5	Granule-bound starch synthase 1, chloroplastic/amyloplastic OS=Oryza sativa subsp. japonica GN=WAXY PE=1 SV=1	67004	53.5	8.34	0.0017	1478	27.43	VMVISPR
Q0DEV5	Granule-bound starch synthase 1, chloroplastic/amyloplastic OS=Oryza sativa subsp. japonica GN=WAXY PE=1 SV=1	67004	53.5	8.34	0.0003	1499	21.5	KINWMK
Q0DEV5	Granule-bound starch synthase 1, chloroplastic/amyloplastic OS=Oryza sativa subsp. japonica GN=WAXY PE=1 SV=1	67004	53.5	8.34	-0.0007	1515	30.88	TGFHMGR
Q0DEV5	Granule-bound starch synthase 1, chloroplastic/amyloplastic OS=Oryza sativa subsp. japonica GN=WAXY PE=1 SV=1	67004	53.5	8.34	-0.0001	1888	26.11	DKYITAK
Q0DEV5	Granule-bound starch synthase 1, chloroplastic/amyloplastic OS=Oryza sativa subsp. japonica GN=WAXY PE=1 SV=1	67004	53.5	8.34	0.0003	1890	30.16	DKYITAK
Q0DEV5	Granule-bound starch synthase 1, chloroplastic/amyloplastic OS=Oryza sativa subsp. japonica GN=WAXY PE=1 SV=1	67004	53.5	8.34	0.0004	1891	21.05	DKYITAK
Q0DEV5	Granule-bound starch synthase 1, chloroplastic/amyloplastic OS=Oryza sativa subsp. japonica GN=WAXY PE=1 SV=1	67004	53.5	8.34	-0.0027	1950	26.89	AGILEADR
Q0DEV5	Granule-bound starch synthase 1, chloroplastic/amyloplastic OS=Oryza sativa subsp. japonica GN=WAXY PE=1 SV=1	67004	53.5	8.34	-0.0014	1952	27.7	AGILEADR
Q0DEV5	Granule-bound starch synthase 1, chloroplastic/amyloplastic OS=Oryza sativa subsp. japonica GN=WAXY PE=1 SV=1	67004	53.5	8.34	-0.0011	1955	27.36	AGILEADR
Q0DEV5	Granule-bound starch synthase 1, chloroplastic/amyloplastic OS=Oryza sativa subsp. japonica GN=WAXY PE=1 SV=1	67004	53.5	8.34	-0.0008	1956	29.13	AGILEADR
Q0DEV5	Granule-bound starch synthase 1, chloroplastic/amyloplastic OS=Oryza sativa subsp. japonica GN=WAXY PE=1 SV=1	67004	53.5	8.34	-0.0008	1957	33.47	AGILEADR
Q0DEV5	Granule-bound starch synthase 1, chloroplastic/amyloplastic OS=Oryza sativa subsp. japonica GN=WAXY PE=1 SV=1	67004	53.5	8.34	-0.0008	1958	31.81	AGILEADR
Q0DEV5	Granule-bound starch synthase 1, chloroplastic/amyloplastic OS=Oryza sativa subsp. japonica GN=WAXY PE=1 SV=1	67004	53.5	8.34	-0.0008	1959	28.11	AGILEADR
Q0DEV5	Granule-bound starch synthase 1, chloroplastic/amyloplastic OS=Oryza sativa subsp. japonica GN=WAXY PE=1 SV=1	67004	53.5	8.34	-0.0008	1960	31.4	AGILEADR
Q0DEV5	Granule-bound starch synthase 1, chloroplastic/amyloplastic OS=Oryza sativa subsp. japonica GN=WAXY PE=1 SV=1	67004	53.5	8.34	-0.0006	1962	28.76	AGILEADR
Q0DEV5	Granule-bound starch synthase 1, chloroplastic/amyloplastic OS=Oryza sativa subsp. japonica GN=WAXY PE=1 SV=1	67004	53.5	8.34	-0.0006	1963	28.63	AGILEADR
Q0DEV5	Granule-bound starch synthase 1, chloroplastic/amyloplastic OS=Oryza sativa subsp. japonica GN=WAXY PE=1 SV=1	67004	53.5	8.34	-0.0006	1964	32.66	AGILEADR
Q0DEV5	Granule-bound starch synthase 1, chloroplastic/amyloplastic OS=Oryza sativa subsp. japonica GN=WAXY PE=1 SV=1	67004	53.5	8.34	-0.0005	1966	45.77	AGILEADR
Q0DEV5	Granule-bound starch synthase 1, chloroplastic/amyloplastic OS=Oryza sativa subsp. japonica GN=WAXY PE=1 SV=1	67004	53.5	8.34	-0.0005	1967	28.84	AGILEADR
Q0DEV5	Granule-bound starch synthase 1, chloroplastic/amyloplastic OS=Oryza sativa subsp. japonica GN=WAXY PE=1 SV=1	67004	53.5	8.34	-0.0005	1968	45.92	AGILEADR
Q0DEV5	Granule-bound starch synthase 1, chloroplastic/amyloplastic OS=Oryza sativa subsp. japonica GN=WAXY PE=1 SV=1	67004	53.5	8.34	-0.0005	1969	28.87	AGILEADR
Q0DEV5	Granule-bound starch synthase 1, chloroplastic/amyloplastic OS=Oryza sativa subsp. japonica GN=WAXY PE=1 SV=1	67004	53.5	8.34	-0.0005	1970	29.33	AGILEADR
Q0DEV5	Granule-bound starch synthase 1, chloroplastic/amyloplastic OS=Oryza sativa subsp. japonica GN=WAXY PE=1 SV=1	67004	53.5	8.34	-0.0005	1971	29.38	AGILEADR
Q0DEV5	Granule-bound starch synthase 1, chloroplastic/amyloplastic OS=Oryza sativa subsp. japonica GN=WAXY PE=1 SV=1	67004	53.5	8.34	-0.0004	1972	29.66	AGILEADR
Q0DEV5	Granule-bound starch synthase 1, chloroplastic/amyloplastic OS=Oryza sativa subsp. japonica GN=WAXY PE=1 SV=1	67004	53.5	8.34	-0.0004	1973	29.27	AGILEADR
Q0DEV5	Granule-bound starch synthase 1, chloroplastic/amyloplastic OS=Oryza sativa subsp. japonica GN=WAXY PE=1 SV=1	67004	53.5	8.34	-0.0004	1974	29.43	AGILEADR
Q0DEV5	Granule-bound starch synthase 1, chloroplastic/amyloplastic OS=Oryza sativa subsp. japonica GN=WAXY PE=1 SV=1	67004	53.5	8.34	-0.0004	1975	29.64	AGILEADR
Q0DEV5	Granule-bound starch synthase 1, chloroplastic/amyloplastic OS=Oryza sativa subsp. japonica GN=WAXY PE=1 SV=1	67004	53.5	8.34	-0.0004	1976	32.57	AGILEADR
Q0DEV5	Granule-bound starch synthase 1, chloroplastic/amyloplastic OS=Oryza sativa subsp. japonica GN=WAXY PE=1 SV=1	67004	53.5	8.34	-0.0003	1978	29.32	AGILEADR
Q0DEV5	Granule-bound starch synthase 1, chloroplastic/amyloplastic OS=Oryza sativa subsp. japonica GN=WAXY PE=1 SV=1	67004	53.5	8.34	-0.0003	1979	33.79	AGILEADR
Q0DEV5	Granule-bound starch synthase 1, chloroplastic/amyloplastic OS=Oryza sativa subsp. japonica GN=WAXY PE=1 SV=1	67004	53.5	8.34	-0.0003	1980	33	AGILEADR
Q0DEV5	Granule-bound starch synthase 1, chloroplastic/amyloplastic OS=Oryza sativa subsp. japonica GN=WAXY PE=1 SV=1	67004	53.5	8.34	-0.0003	1981	33.33	AGILEADR
Q0DEV5	Granule-bound starch synthase 1, chloroplastic/amyloplastic OS=Oryza sativa subsp. japonica GN=WAXY PE=1 SV=1	67004	53.5	8.34	-0.0003	1982	26.86	AGILEADR
Q0DEV5	Granule-bound starch synthase 1, chloroplastic/amyloplastic OS=Oryza sativa subsp. japonica GN=WAXY PE=1 SV=1	67004	53.5	8.34	-0.0003	1983	26.48	AGILEADR
Q0DEV5	Granule-bound starch synthase 1, chloroplastic/amyloplastic OS=Oryza sativa subsp. japonica GN=WAXY PE=1 SV=1	67004	53.5	8.34	-0.0003	1984	32.79	AGILEADR
Q0DEV5	Granule-bound starch synthase 1, chloroplastic/amyloplastic OS=Oryza sativa subsp. japonica GN=WAXY PE=1 SV=1	67004	53.5	8.34	-0.0003	1986	55.32	AGILEADR
Q0DEV5	Granule-bound starch synthase 1, chloroplastic/amyloplastic OS=Oryza sativa subsp. japonica GN=WAXY PE=1 SV=1	67004	53.5	8.34	-0.0003	1987	33.46	AGILEADR
Q0DEV5	Granule-bound starch synthase 1, chloroplastic/amyloplastic OS=Oryza sativa subsp. japonica GN=WAXY PE=1 SV=1	67004	53.5	8.34	-0.0003	1988	29.39	AGILEADR
Q0DEV5	Granule-bound starch synthase 1, chloroplastic/amyloplastic OS=Oryza sativa subsp. japonica GN=WAXY PE=1 SV=1	67004	53.5	8.34	-0.0002	1989	33.36	AGILEADR
Q0DEV5	Granule-bound starch synthase 1, chloroplastic/amyloplastic OS=Oryza sativa subsp. japonica GN=WAXY PE=1 SV=1	67004	53.5	8.34	-0.0002	1990	33.32	AGILEADR
Q0DEV5	Granule-bound starch synthase 1, chloroplastic/amyloplastic OS=Oryza sativa subsp. japonica GN=WAXY PE=1 SV=1	67004	53.5	8.34	-0.0002	1991	32.96	AGILEADR
Q0DEV5	Granule-bound starch synthase 1, chloroplastic/amyloplastic OS=Oryza sativa subsp. japonica GN=WAXY PE=1 SV=1	67004	53.5	8.34	-0.0002	1992	29.09	AGILEADR
Q0DEV5	Granule-bound starch synthase 1, chloroplastic/amyloplastic OS=Oryza sativa subsp. japonica GN=WAXY PE=1 SV=1	67004	53.5	8.34	-0.0002	1993	33.31	AGILEADR
Q0DEV5	Granule-bound starch synthase 1, chloroplastic/amyloplastic OS=Oryza sativa subsp. japonica GN=WAXY PE=1 SV=1	67004	53.5	8.34	-0.0001	1995	25.67	AGILEADR
Q0DEV5	Granule-bound starch synthase 1, chloroplastic/amyloplastic OS=Oryza sativa subsp. japonica GN=WAXY PE=1 SV=1	67004	53.5	8.34	-0.0001	1997	28.81	AGILEADR
Q0DEV5	Granule-bound starch synthase 1, chloroplastic/amyloplastic OS=Oryza sativa subsp. japonica GN=WAXY PE=1 SV=1	67004	53.5	8.34	-0.0001	1998	29.24	AGILEADR
Q0DEV5	Granule-bound starch synthase 1, chloroplastic/amyloplastic OS=Oryza sativa subsp. japonica GN=WAXY PE=1 SV=1	67004	53.5	8.34	-0.0001	2001	22.15	AGILEADR
Q0DEV5	Granule-bound starch synthase 1, chloroplastic/amyloplastic OS=Oryza sativa subsp. japonica GN=WAXY PE=1 SV=1	67004	53.5	8.34	-0.0001	2002	24.22	AGILEADR
Q0DEV5	Granule-bound starch synthase 1, chloroplastic/amyloplastic OS=Oryza sativa subsp. japonica GN=WAXY PE=1 SV=1	67004	53.5	8.34	-0.0001	2003	29.88	AGILEADR
Q0DEV5	Granule-bound starch synthase 1, chloroplastic/amyloplastic OS=Oryza sativa subsp. japonica GN=WAXY PE=1 SV=1	67004	53.5	8.34	-0.0001	2004	32.11	AGILEADR
Q0DEV5	Granule-bound starch synthase 1, chloroplastic/amyloplastic OS=Oryza sativa subsp. japonica GN=WAXY PE=1 SV=1	67004	53.5	8.34	-0.0001	2005	32.52	AGILEADR
Q0DEV5	Granule-bound starch synthase 1, chloroplastic/amyloplastic OS=Oryza sativa subsp. japonica GN=WAXY PE=1 SV=1	67004	53.5	8.34	-0.0001	2006	33.17	AGILEADR
Q0DEV5	Granule-bound starch synthase 1, chloroplastic/amyloplastic OS=Oryza sativa subsp. japonica GN=WAXY PE=1 SV=1	67004	53.5	8.34	0	2008	33.6	AGILEADR
Q0DEV5	Granule-bound starch synthase 1, chloroplastic/amyloplastic OS=Oryza sativa subsp. japonica GN=WAXY PE=1 SV=1	67004	53.5	8.34	0	2009	32.78	AGILEADR
Q0DEV5	Granule-bound starch synthase 1, chloroplastic/amyloplastic OS=Oryza sativa subsp. japonica GN=WAXY PE=1 SV=1	67004	53.5	8.34	0	2010	26.85	AGILEADR
Q0DEV5	Granule-bound starch synthase 1, chloroplastic/amyloplastic OS=Oryza sativa subsp. japonica GN=WAXY PE=1 SV=1	67004	53.5	8.34	0	2011	29.34	AGILEADR
Q0DEV5	Granule-bound starch synthase 1, chloroplastic/amyloplastic OS=Oryza sativa subsp. japonica GN=WAXY PE=1 SV=1	67004	53.5	8.34	0	2012	33.4	AGILEADR
Q0DEV5	Granule-bound starch synthase 1, chloroplastic/amyloplastic OS=Oryza sativa subsp. japonica GN=WAXY PE=1 SV=1	67004	53.5	8.34	0.0006	2014	27.46	AGILEADR
Q0DEV5	Granule-bound starch synthase 1, chloroplastic/amyloplastic OS=Oryza sativa subsp. japonica GN=WAXY PE=1 SV=1	67004	53.5	8.34	0.0016	2015	45.94	AGILEADR
Q0DEV5	Granule-bound starch synthase 1, chloroplastic/amyloplastic OS=Oryza sativa subsp. japonica GN=WAXY PE=1 SV=1	67004	53.5	8.34	0	2447	40.12	VVEPSDVK
Q0DEV5	Granule-bound starch synthase 1, chloroplastic/amyloplastic OS=Oryza sativa subsp. japonica GN=WAXY PE=1 SV=1	67004	53.5	8.34	0.0001	2448	35.7	VVEPSDVK
Q0DEV5	Granule-bound starch synthase 1, chloroplastic/amyloplastic OS=Oryza sativa subsp. japonica GN=WAXY PE=1 SV=1	67004	53.5	8.34	0.0002	2449	28.32	VVEPSDVK
Q0DEV5	Granule-bound starch synthase 1, chloroplastic/amyloplastic OS=Oryza sativa subsp. japonica GN=WAXY PE=1 SV=1	67004	53.5	8.34	0.0002	2450	22.43	VVEPSDVK
Q0DEV5	Granule-bound starch synthase 1, chloroplastic/amyloplastic OS=Oryza sativa subsp. japonica GN=WAXY PE=1 SV=1	67004	53.5	8.34	0.0003	2451	24.73	VVEPSDVK
Q0DEV5	Granule-bound starch synthase 1, chloroplastic/amyloplastic OS=Oryza sativa subsp. japonica GN=WAXY PE=1 SV=1	67004	53.5	8.34	0.0003	2452	33.54	VVEPSDVK
Q0DEV5	Granule-bound starch synthase 1, chloroplastic/amyloplastic OS=Oryza sativa subsp. japonica GN=WAXY PE=1 SV=1	67004	53.5	8.34	0.0004	2453	36.89	VVEPSDVK
Q0DEV5	Granule-bound starch synthase 1, chloroplastic/amyloplastic OS=Oryza sativa subsp. japonica GN=WAXY PE=1 SV=1	67004	53.5	8.34	0.0009	2454	41.01	VVEPSDVK
Q0DEV5	Granule-bound starch synthase 1, chloroplastic/amyloplastic OS=Oryza sativa subsp. japonica GN=WAXY PE=1 SV=1	67004	53.5	8.34	0.0009	2455	47.25	VVEPSDVK
Q0DEV5	Granule-bound starch synthase 1, chloroplastic/amyloplastic OS=Oryza sativa subsp. japonica GN=WAXY PE=1 SV=1	67004	53.5	8.34	0.0002	2956	26.17	VADRYER
Q0DEV5	Granule-bound starch synthase 1, chloroplastic/amyloplastic OS=Oryza sativa subsp. japonica GN=WAXY PE=1 SV=1	67004	53.5	8.34	-0.0004	4589	20.99	VVEPSDVKK
Q0DEV5	Granule-bound starch synthase 1, chloroplastic/amyloplastic OS=Oryza sativa subsp. japonica GN=WAXY PE=1 SV=1	67004	53.5	8.34	-0.0002	4597	22.01	VVEPSDVKK
Q0DEV5	Granule-bound starch synthase 1, chloroplastic/amyloplastic OS=Oryza sativa subsp. japonica GN=WAXY PE=1 SV=1	67004	53.5	8.34	0	4598	40.7	VVEPSDVKK
Q0DEV5	Granule-bound starch synthase 1, chloroplastic/amyloplastic OS=Oryza sativa subsp. japonica GN=WAXY PE=1 SV=1	67004	53.5	8.34	0	4602	50.85	VVEPSDVKK
Q0DEV5	Granule-bound starch synthase 1, chloroplastic/amyloplastic OS=Oryza sativa subsp. japonica GN=WAXY PE=1 SV=1	67004	53.5	8.34	0.0003	4606	20.58	VVEPSDVKK
Q0DEV5	Granule-bound starch synthase 1, chloroplastic/amyloplastic OS=Oryza sativa subsp. japonica GN=WAXY PE=1 SV=1	67004	53.5	8.34	0.0005	4610	21.89	VVEPSDVKK
Q0DEV5	Granule-bound starch synthase 1, chloroplastic/amyloplastic OS=Oryza sativa subsp. japonica GN=WAXY PE=1 SV=1	67004	53.5	8.34	0.0008	4611	24.58	VVEPSDVKK
Q0DEV5	Granule-bound starch synthase 1, chloroplastic/amyloplastic OS=Oryza sativa subsp. japonica GN=WAXY PE=1 SV=1	67004	53.5	8.34	0.0025	4615	22.3	VVEPSDVKK
Q0DEV5	Granule-bound starch synthase 1, chloroplastic/amyloplastic OS=Oryza sativa subsp. japonica GN=WAXY PE=1 SV=1	67004	53.5	8.34	0.0004	5818	22.46	SMEEKYPGK
Q0DEV5	Granule-bound starch synthase 1, chloroplastic/amyloplastic OS=Oryza sativa subsp. japonica GN=WAXY PE=1 SV=1	67004	53.5	8.34	0.0004	5819	25.75	SMEEKYPGK
Q0DEV5	Granule-bound starch synthase 1, chloroplastic/amyloplastic OS=Oryza sativa subsp. japonica GN=WAXY PE=1 SV=1	67004	53.5	8.34	0.0004	5820	21.3	SMEEKYPGK
Q0DEV5	Granule-bound starch synthase 1, chloroplastic/amyloplastic OS=Oryza sativa subsp. japonica GN=WAXY PE=1 SV=1	67004	53.5	8.34	0.0004	5821	34.41	SMEEKYPGK
Q0DEV5	Granule-bound starch synthase 1, chloroplastic/amyloplastic OS=Oryza sativa subsp. japonica GN=WAXY PE=1 SV=1	67004	53.5	8.34	0.0005	5822	50.31	SMEEKYPGK
Q0DEV5	Granule-bound starch synthase 1, chloroplastic/amyloplastic OS=Oryza sativa subsp. japonica GN=WAXY PE=1 SV=1	67004	53.5	8.34	0.0005	5823	22.83	SMEEKYPGK
Q0DEV5	Granule-bound starch synthase 1, chloroplastic/amyloplastic OS=Oryza sativa subsp. japonica GN=WAXY PE=1 SV=1	67004	53.5	8.34	-0.0002	5940	28.66	YDATTAIEAK
Q0DEV5	Granule-bound starch synthase 1, chloroplastic/amyloplastic OS=Oryza sativa subsp. japonica GN=WAXY PE=1 SV=1	67004	53.5	8.34	-0.0001	5942	45.65	YDATTAIEAK
Q0DEV5	Granule-bound starch synthase 1, chloroplastic/amyloplastic OS=Oryza sativa subsp. japonica GN=WAXY PE=1 SV=1	67004	53.5	8.34	0	5944	43.59	YDATTAIEAK
Q0DEV5	Granule-bound starch synthase 1, chloroplastic/amyloplastic OS=Oryza sativa subsp. japonica GN=WAXY PE=1 SV=1	67004	53.5	8.34	0.0001	5945	26.35	YDATTAIEAK
Q0DEV5	Granule-bound starch synthase 1, chloroplastic/amyloplastic OS=Oryza sativa subsp. japonica GN=WAXY PE=1 SV=1	67004	53.5	8.34	0.0003	5946	28.33	YDATTAIEAK
Q0DEV5	Granule-bound starch synthase 1, chloroplastic/amyloplastic OS=Oryza sativa subsp. japonica GN=WAXY PE=1 SV=1	67004	53.5	8.34	0.0004	5948	47.83	YDATTAIEAK
Q0DEV5	Granule-bound starch synthase 1, chloroplastic/amyloplastic OS=Oryza sativa subsp. japonica GN=WAXY PE=1 SV=1	67004	53.5	8.34	0.0004	5949	60.56	YDATTAIEAK
Q0DEV5	Granule-bound starch synthase 1, chloroplastic/amyloplastic OS=Oryza sativa subsp. japonica GN=WAXY PE=1 SV=1	67004	53.5	8.34	0.0005	5951	70.17	YDATTAIEAK
Q0DEV5	Granule-bound starch synthase 1, chloroplastic/amyloplastic OS=Oryza sativa subsp. japonica GN=WAXY PE=1 SV=1	67004	53.5	8.34	0.0005	5952	39.45	YDATTAIEAK
Q0DEV5	Granule-bound starch synthase 1, chloroplastic/amyloplastic OS=Oryza sativa subsp. japonica GN=WAXY PE=1 SV=1	67004	53.5	8.34	0.0005	5954	60.19	YDATTAIEAK
Q0DEV5	Granule-bound starch synthase 1, chloroplastic/amyloplastic OS=Oryza sativa subsp. japonica GN=WAXY PE=1 SV=1	67004	53.5	8.34	0.0006	5955	33.14	YDATTAIEAK
Q0DEV5	Granule-bound starch synthase 1, chloroplastic/amyloplastic OS=Oryza sativa subsp. japonica GN=WAXY PE=1 SV=1	67004	53.5	8.34	0.0006	5956	48.03	YDATTAIEAK
Q0DEV5	Granule-bound starch synthase 1, chloroplastic/amyloplastic OS=Oryza sativa subsp. japonica GN=WAXY PE=1 SV=1	67004	53.5	8.34	0.0006	5957	44.13	YDATTAIEAK
Q0DEV5	Granule-bound starch synthase 1, chloroplastic/amyloplastic OS=Oryza sativa subsp. japonica GN=WAXY PE=1 SV=1	67004	53.5	8.34	0.0006	5958	21.18	YDATTAIEAK
Q0DEV5	Granule-bound starch synthase 1, chloroplastic/amyloplastic OS=Oryza sativa subsp. japonica GN=WAXY PE=1 SV=1	67004	53.5	8.34	0.0006	5959	50.17	YDATTAIEAK
Q0DEV5	Granule-bound starch synthase 1, chloroplastic/amyloplastic OS=Oryza sativa subsp. japonica GN=WAXY PE=1 SV=1	67004	53.5	8.34	0.0006	5960	63.02	YDATTAIEAK
Q0DEV5	Granule-bound starch synthase 1, chloroplastic/amyloplastic OS=Oryza sativa subsp. japonica GN=WAXY PE=1 SV=1	67004	53.5	8.34	0.0006	5961	52.67	YDATTAIEAK
Q0DEV5	Granule-bound starch synthase 1, chloroplastic/amyloplastic OS=Oryza sativa subsp. japonica GN=WAXY PE=1 SV=1	67004	53.5	8.34	0.0008	5962	23.08	YDATTAIEAK
Q0DEV5	Granule-bound starch synthase 1, chloroplastic/amyloplastic OS=Oryza sativa subsp. japonica GN=WAXY PE=1 SV=1	67004	53.5	8.34	0.0008	5963	20.18	YDATTAIEAK
Q0DEV5	Granule-bound starch synthase 1, chloroplastic/amyloplastic OS=Oryza sativa subsp. japonica GN=WAXY PE=1 SV=1	67004	53.5	8.34	0.0008	5964	44.43	YDATTAIEAK
Q0DEV5	Granule-bound starch synthase 1, chloroplastic/amyloplastic OS=Oryza sativa subsp. japonica GN=WAXY PE=1 SV=1	67004	53.5	8.34	0.0008	5965	66.43	YDATTAIEAK
Q0DEV5	Granule-bound starch synthase 1, chloroplastic/amyloplastic OS=Oryza sativa subsp. japonica GN=WAXY PE=1 SV=1	67004	53.5	8.34	0.0009	5967	36.1	YDATTAIEAK
Q0DEV5	Granule-bound starch synthase 1, chloroplastic/amyloplastic OS=Oryza sativa subsp. japonica GN=WAXY PE=1 SV=1	67004	53.5	8.34	0.0009	5970	60.13	YDATTAIEAK
Q0DEV5	Granule-bound starch synthase 1, chloroplastic/amyloplastic OS=Oryza sativa subsp. japonica GN=WAXY PE=1 SV=1	67004	53.5	8.34	0.0009	5971	45.37	YDATTAIEAK
Q0DEV5	Granule-bound starch synthase 1, chloroplastic/amyloplastic OS=Oryza sativa subsp. japonica GN=WAXY PE=1 SV=1	67004	53.5	8.34	0.001	5973	38.73	YDATTAIEAK
Q0DEV5	Granule-bound starch synthase 1, chloroplastic/amyloplastic OS=Oryza sativa subsp. japonica GN=WAXY PE=1 SV=1	67004	53.5	8.34	0.001	5974	39.37	YDATTAIEAK
Q0DEV5	Granule-bound starch synthase 1, chloroplastic/amyloplastic OS=Oryza sativa subsp. japonica GN=WAXY PE=1 SV=1	67004	53.5	8.34	0.001	5975	55.36	YDATTAIEAK
Q0DEV5	Granule-bound starch synthase 1, chloroplastic/amyloplastic OS=Oryza sativa subsp. japonica GN=WAXY PE=1 SV=1	67004	53.5	8.34	0.001	5976	79.04	YDATTAIEAK
Q0DEV5	Granule-bound starch synthase 1, chloroplastic/amyloplastic OS=Oryza sativa subsp. japonica GN=WAXY PE=1 SV=1	67004	53.5	8.34	0.0012	5980	38.18	YDATTAIEAK
Q0DEV5	Granule-bound starch synthase 1, chloroplastic/amyloplastic OS=Oryza sativa subsp. japonica GN=WAXY PE=1 SV=1	67004	53.5	8.34	0.0014	5982	21.29	YDATTAIEAK
Q0DEV5	Granule-bound starch synthase 1, chloroplastic/amyloplastic OS=Oryza sativa subsp. japonica GN=WAXY PE=1 SV=1	67004	53.5	8.34	0.0014	5983	50.31	YDATTAIEAK
Q0DEV5	Granule-bound starch synthase 1, chloroplastic/amyloplastic OS=Oryza sativa subsp. japonica GN=WAXY PE=1 SV=1	67004	53.5	8.34	0.0033	5988	27.74	YDATTAIEAK
Q0DEV5	Granule-bound starch synthase 1, chloroplastic/amyloplastic OS=Oryza sativa subsp. japonica GN=WAXY PE=1 SV=1	67004	53.5	8.34	-0.0003	6014	23.86	SMEEKYPGK
Q0DEV5	Granule-bound starch synthase 1, chloroplastic/amyloplastic OS=Oryza sativa subsp. japonica GN=WAXY PE=1 SV=1	67004	53.5	8.34	0.0002	6493	52.25	GCELDNIMR
Q0DEV5	Granule-bound starch synthase 1, chloroplastic/amyloplastic OS=Oryza sativa subsp. japonica GN=WAXY PE=1 SV=1	67004	53.5	8.34	0.0004	6494	42.64	GCELDNIMR
Q0DEV5	Granule-bound starch synthase 1, chloroplastic/amyloplastic OS=Oryza sativa subsp. japonica GN=WAXY PE=1 SV=1	67004	53.5	8.34	0.0004	6495	30.8	GCELDNIMR
Q0DEV5	Granule-bound starch synthase 1, chloroplastic/amyloplastic OS=Oryza sativa subsp. japonica GN=WAXY PE=1 SV=1	67004	53.5	8.34	0.0005	6497	51.6	GCELDNIMR
Q0DEV5	Granule-bound starch synthase 1, chloroplastic/amyloplastic OS=Oryza sativa subsp. japonica GN=WAXY PE=1 SV=1	67004	53.5	8.34	0.0007	6498	42.65	GCELDNIMR
Q0DEV5	Granule-bound starch synthase 1, chloroplastic/amyloplastic OS=Oryza sativa subsp. japonica GN=WAXY PE=1 SV=1	67004	53.5	8.34	0.0007	6499	56.21	GCELDNIMR
Q0DEV5	Granule-bound starch synthase 1, chloroplastic/amyloplastic OS=Oryza sativa subsp. japonica GN=WAXY PE=1 SV=1	67004	53.5	8.34	0.0007	6500	48.41	GCELDNIMR
Q0DEV5	Granule-bound starch synthase 1, chloroplastic/amyloplastic OS=Oryza sativa subsp. japonica GN=WAXY PE=1 SV=1	67004	53.5	8.34	0.0007	6501	21.45	GCELDNIMR
Q0DEV5	Granule-bound starch synthase 1, chloroplastic/amyloplastic OS=Oryza sativa subsp. japonica GN=WAXY PE=1 SV=1	67004	53.5	8.34	0.0008	6503	65.2	GCELDNIMR
Q0DEV5	Granule-bound starch synthase 1, chloroplastic/amyloplastic OS=Oryza sativa subsp. japonica GN=WAXY PE=1 SV=1	67004	53.5	8.34	0.0008	6504	20.45	GCELDNIMR
Q0DEV5	Granule-bound starch synthase 1, chloroplastic/amyloplastic OS=Oryza sativa subsp. japonica GN=WAXY PE=1 SV=1	67004	53.5	8.34	0.0008	6505	37.92	GCELDNIMR
Q0DEV5	Granule-bound starch synthase 1, chloroplastic/amyloplastic OS=Oryza sativa subsp. japonica GN=WAXY PE=1 SV=1	67004	53.5	8.34	0.0011	6506	29.43	GCELDNIMR
Q0DEV5	Granule-bound starch synthase 1, chloroplastic/amyloplastic OS=Oryza sativa subsp. japonica GN=WAXY PE=1 SV=1	67004	53.5	8.34	0.0017	6509	35.2	GCELDNIMR
Q0DEV5	Granule-bound starch synthase 1, chloroplastic/amyloplastic OS=Oryza sativa subsp. japonica GN=WAXY PE=1 SV=1	67004	53.5	8.34	0.0019	6510	38.29	GCELDNIMR
Q0DEV5	Granule-bound starch synthase 1, chloroplastic/amyloplastic OS=Oryza sativa subsp. japonica GN=WAXY PE=1 SV=1	67004	53.5	8.34	-0.0012	6871	24.83	GCELDNIMR
Q0DEV5	Granule-bound starch synthase 1, chloroplastic/amyloplastic OS=Oryza sativa subsp. japonica GN=WAXY PE=1 SV=1	67004	53.5	8.34	-0.0003	6873	23.44	GCELDNIMR
Q0DEV5	Granule-bound starch synthase 1, chloroplastic/amyloplastic OS=Oryza sativa subsp. japonica GN=WAXY PE=1 SV=1	67004	53.5	8.34	-0.0001	6874	28.45	GCELDNIMR
Q0DEV5	Granule-bound starch synthase 1, chloroplastic/amyloplastic OS=Oryza sativa subsp. japonica GN=WAXY PE=1 SV=1	67004	53.5	8.34	-0.0001	6875	31.12	GCELDNIMR
Q0DEV5	Granule-bound starch synthase 1, chloroplastic/amyloplastic OS=Oryza sativa subsp. japonica GN=WAXY PE=1 SV=1	67004	53.5	8.34	0.0001	6876	35.07	GCELDNIMR
Q0DEV5	Granule-bound starch synthase 1, chloroplastic/amyloplastic OS=Oryza sativa subsp. japonica GN=WAXY PE=1 SV=1	67004	53.5	8.34	0.0001	6877	30.73	GCELDNIMR
Q0DEV5	Granule-bound starch synthase 1, chloroplastic/amyloplastic OS=Oryza sativa subsp. japonica GN=WAXY PE=1 SV=1	67004	53.5	8.34	0.0003	6881	29.08	GCELDNIMR
Q0DEV5	Granule-bound starch synthase 1, chloroplastic/amyloplastic OS=Oryza sativa subsp. japonica GN=WAXY PE=1 SV=1	67004	53.5	8.34	0.0003	6882	26.3	GCELDNIMR
Q0DEV5	Granule-bound starch synthase 1, chloroplastic/amyloplastic OS=Oryza sativa subsp. japonica GN=WAXY PE=1 SV=1	67004	53.5	8.34	0.0003	6883	51.19	GCELDNIMR
Q0DEV5	Granule-bound starch synthase 1, chloroplastic/amyloplastic OS=Oryza sativa subsp. japonica GN=WAXY PE=1 SV=1	67004	53.5	8.34	0.0003	6884	46.75	GCELDNIMR
Q0DEV5	Granule-bound starch synthase 1, chloroplastic/amyloplastic OS=Oryza sativa subsp. japonica GN=WAXY PE=1 SV=1	67004	53.5	8.34	0.0004	6886	30.43	GCELDNIMR
Q0DEV5	Granule-bound starch synthase 1, chloroplastic/amyloplastic OS=Oryza sativa subsp. japonica GN=WAXY PE=1 SV=1	67004	53.5	8.34	0.0004	6887	29.42	GCELDNIMR
Q0DEV5	Granule-bound starch synthase 1, chloroplastic/amyloplastic OS=Oryza sativa subsp. japonica GN=WAXY PE=1 SV=1	67004	53.5	8.34	0.0004	6888	39.5	GCELDNIMR
Q0DEV5	Granule-bound starch synthase 1, chloroplastic/amyloplastic OS=Oryza sativa subsp. japonica GN=WAXY PE=1 SV=1	67004	53.5	8.34	0.0004	6889	28.85	GCELDNIMR
Q0DEV5	Granule-bound starch synthase 1, chloroplastic/amyloplastic OS=Oryza sativa subsp. japonica GN=WAXY PE=1 SV=1	67004	53.5	8.34	0.0004	6890	32.02	GCELDNIMR
Q0DEV5	Granule-bound starch synthase 1, chloroplastic/amyloplastic OS=Oryza sativa subsp. japonica GN=WAXY PE=1 SV=1	67004	53.5	8.34	0.0004	6891	42.57	GCELDNIMR
Q0DEV5	Granule-bound starch synthase 1, chloroplastic/amyloplastic OS=Oryza sativa subsp. japonica GN=WAXY PE=1 SV=1	67004	53.5	8.34	0.0006	6892	42.63	GCELDNIMR
Q0DEV5	Granule-bound starch synthase 1, chloroplastic/amyloplastic OS=Oryza sativa subsp. japonica GN=WAXY PE=1 SV=1	67004	53.5	8.34	0.0008	6893	27.95	GCELDNIMR
Q0DEV5	Granule-bound starch synthase 1, chloroplastic/amyloplastic OS=Oryza sativa subsp. japonica GN=WAXY PE=1 SV=1	67004	53.5	8.34	0.0001	8800	67.77	IYGPDTGVDYK
Q0DEV5	Granule-bound starch synthase 1, chloroplastic/amyloplastic OS=Oryza sativa subsp. japonica GN=WAXY PE=1 SV=1	67004	53.5	8.34	0.0002	8801	65.6	IYGPDTGVDYK
Q0DEV5	Granule-bound starch synthase 1, chloroplastic/amyloplastic OS=Oryza sativa subsp. japonica GN=WAXY PE=1 SV=1	67004	53.5	8.34	0.0002	8802	60.11	IYGPDTGVDYK
Q0DEV5	Granule-bound starch synthase 1, chloroplastic/amyloplastic OS=Oryza sativa subsp. japonica GN=WAXY PE=1 SV=1	67004	53.5	8.34	0.0002	8803	81.01	IYGPDTGVDYK
Q0DEV5	Granule-bound starch synthase 1, chloroplastic/amyloplastic OS=Oryza sativa subsp. japonica GN=WAXY PE=1 SV=1	67004	53.5	8.34	0.0002	8804	55.93	IYGPDTGVDYK
Q0DEV5	Granule-bound starch synthase 1, chloroplastic/amyloplastic OS=Oryza sativa subsp. japonica GN=WAXY PE=1 SV=1	67004	53.5	8.34	0.0003	8805	76.26	IYGPDTGVDYK
Q0DEV5	Granule-bound starch synthase 1, chloroplastic/amyloplastic OS=Oryza sativa subsp. japonica GN=WAXY PE=1 SV=1	67004	53.5	8.34	0.0003	8806	48.79	IYGPDTGVDYK
Q0DEV5	Granule-bound starch synthase 1, chloroplastic/amyloplastic OS=Oryza sativa subsp. japonica GN=WAXY PE=1 SV=1	67004	53.5	8.34	0.0003	8807	62.19	IYGPDTGVDYK
Q0DEV5	Granule-bound starch synthase 1, chloroplastic/amyloplastic OS=Oryza sativa subsp. japonica GN=WAXY PE=1 SV=1	67004	53.5	8.34	0.0004	8808	66.85	IYGPDTGVDYK
Q0DEV5	Granule-bound starch synthase 1, chloroplastic/amyloplastic OS=Oryza sativa subsp. japonica GN=WAXY PE=1 SV=1	67004	53.5	8.34	0.0004	8809	68.5	IYGPDTGVDYK
Q0DEV5	Granule-bound starch synthase 1, chloroplastic/amyloplastic OS=Oryza sativa subsp. japonica GN=WAXY PE=1 SV=1	67004	53.5	8.34	0.0004	8810	66.82	IYGPDTGVDYK
Q0DEV5	Granule-bound starch synthase 1, chloroplastic/amyloplastic OS=Oryza sativa subsp. japonica GN=WAXY PE=1 SV=1	67004	53.5	8.34	0.0004	8811	88.18	IYGPDTGVDYK
Q0DEV5	Granule-bound starch synthase 1, chloroplastic/amyloplastic OS=Oryza sativa subsp. japonica GN=WAXY PE=1 SV=1	67004	53.5	8.34	0.0004	8812	51.15	IYGPDTGVDYK
Q0DEV5	Granule-bound starch synthase 1, chloroplastic/amyloplastic OS=Oryza sativa subsp. japonica GN=WAXY PE=1 SV=1	67004	53.5	8.34	0.0004	8813	39.85	IYGPDTGVDYK
Q0DEV5	Granule-bound starch synthase 1, chloroplastic/amyloplastic OS=Oryza sativa subsp. japonica GN=WAXY PE=1 SV=1	67004	53.5	8.34	0.0006	8814	58.63	IYGPDTGVDYK
Q0DEV5	Granule-bound starch synthase 1, chloroplastic/amyloplastic OS=Oryza sativa subsp. japonica GN=WAXY PE=1 SV=1	67004	53.5	8.34	0.0006	8815	81.91	IYGPDTGVDYK
Q0DEV5	Granule-bound starch synthase 1, chloroplastic/amyloplastic OS=Oryza sativa subsp. japonica GN=WAXY PE=1 SV=1	67004	53.5	8.34	0.0006	8816	73.88	IYGPDTGVDYK
Q0DEV5	Granule-bound starch synthase 1, chloroplastic/amyloplastic OS=Oryza sativa subsp. japonica GN=WAXY PE=1 SV=1	67004	53.5	8.34	0.0006	8817	42.46	IYGPDTGVDYK
Q0DEV5	Granule-bound starch synthase 1, chloroplastic/amyloplastic OS=Oryza sativa subsp. japonica GN=WAXY PE=1 SV=1	67004	53.5	8.34	0.0007	8818	38.69	IYGPDTGVDYK
Q0DEV5	Granule-bound starch synthase 1, chloroplastic/amyloplastic OS=Oryza sativa subsp. japonica GN=WAXY PE=1 SV=1	67004	53.5	8.34	0.0012	8819	56.49	IYGPDTGVDYK
Q0DEV5	Granule-bound starch synthase 1, chloroplastic/amyloplastic OS=Oryza sativa subsp. japonica GN=WAXY PE=1 SV=1	67004	53.5	8.34	0.0014	8820	60.96	IYGPDTGVDYK
Q0DEV5	Granule-bound starch synthase 1, chloroplastic/amyloplastic OS=Oryza sativa subsp. japonica GN=WAXY PE=1 SV=1	67004	53.5	8.34	0.002	8822	27.86	IYGPDTGVDYK
Q0DEV5	Granule-bound starch synthase 1, chloroplastic/amyloplastic OS=Oryza sativa subsp. japonica GN=WAXY PE=1 SV=1	67004	53.5	8.34	-0.0018	10079	21.74	NCMNQDLSWK
Q0DEV5	Granule-bound starch synthase 1, chloroplastic/amyloplastic OS=Oryza sativa subsp. japonica GN=WAXY PE=1 SV=1	67004	53.5	8.34	-0.0009	10080	27.92	NCMNQDLSWK
Q0DEV5	Granule-bound starch synthase 1, chloroplastic/amyloplastic OS=Oryza sativa subsp. japonica GN=WAXY PE=1 SV=1	67004	53.5	8.34	0.0001	10081	61.82	NCMNQDLSWK
Q0DEV5	Granule-bound starch synthase 1, chloroplastic/amyloplastic OS=Oryza sativa subsp. japonica GN=WAXY PE=1 SV=1	67004	53.5	8.34	0.0004	10082	70.58	NCMNQDLSWK
Q0DEV5	Granule-bound starch synthase 1, chloroplastic/amyloplastic OS=Oryza sativa subsp. japonica GN=WAXY PE=1 SV=1	67004	53.5	8.34	0.0004	10083	70.03	NCMNQDLSWK
Q0DEV5	Granule-bound starch synthase 1, chloroplastic/amyloplastic OS=Oryza sativa subsp. japonica GN=WAXY PE=1 SV=1	67004	53.5	8.34	0.0005	10084	69.69	NCMNQDLSWK
Q0DEV5	Granule-bound starch synthase 1, chloroplastic/amyloplastic OS=Oryza sativa subsp. japonica GN=WAXY PE=1 SV=1	67004	53.5	8.34	0.0006	10085	70.11	NCMNQDLSWK
Q0DEV5	Granule-bound starch synthase 1, chloroplastic/amyloplastic OS=Oryza sativa subsp. japonica GN=WAXY PE=1 SV=1	67004	53.5	8.34	0.0006	10086	30.5	NCMNQDLSWK
Q0DEV5	Granule-bound starch synthase 1, chloroplastic/amyloplastic OS=Oryza sativa subsp. japonica GN=WAXY PE=1 SV=1	67004	53.5	8.34	-0.0049	10410	29.29	NCMNQDLSWK
Q0DEV5	Granule-bound starch synthase 1, chloroplastic/amyloplastic OS=Oryza sativa subsp. japonica GN=WAXY PE=1 SV=1	67004	53.5	8.34	-0.0003	10416	88.31	NCMNQDLSWK
Q0DEV5	Granule-bound starch synthase 1, chloroplastic/amyloplastic OS=Oryza sativa subsp. japonica GN=WAXY PE=1 SV=1	67004	53.5	8.34	-0.0002	10417	78.38	NCMNQDLSWK
Q0DEV5	Granule-bound starch synthase 1, chloroplastic/amyloplastic OS=Oryza sativa subsp. japonica GN=WAXY PE=1 SV=1	67004	53.5	8.34	-0.0002	10418	67.85	NCMNQDLSWK
Q0DEV5	Granule-bound starch synthase 1, chloroplastic/amyloplastic OS=Oryza sativa subsp. japonica GN=WAXY PE=1 SV=1	67004	53.5	8.34	-0.0002	10419	54.23	NCMNQDLSWK
Q0DEV5	Granule-bound starch synthase 1, chloroplastic/amyloplastic OS=Oryza sativa subsp. japonica GN=WAXY PE=1 SV=1	67004	53.5	8.34	0	10420	70.32	NCMNQDLSWK
Q0DEV5	Granule-bound starch synthase 1, chloroplastic/amyloplastic OS=Oryza sativa subsp. japonica GN=WAXY PE=1 SV=1	67004	53.5	8.34	0	10421	67.65	NCMNQDLSWK
Q0DEV5	Granule-bound starch synthase 1, chloroplastic/amyloplastic OS=Oryza sativa subsp. japonica GN=WAXY PE=1 SV=1	67004	53.5	8.34	0.0001	10423	74.16	NCMNQDLSWK
Q0DEV5	Granule-bound starch synthase 1, chloroplastic/amyloplastic OS=Oryza sativa subsp. japonica GN=WAXY PE=1 SV=1	67004	53.5	8.34	0.0001	10424	74.5	NCMNQDLSWK
Q0DEV5	Granule-bound starch synthase 1, chloroplastic/amyloplastic OS=Oryza sativa subsp. japonica GN=WAXY PE=1 SV=1	67004	53.5	8.34	0.0002	10426	61.16	NCMNQDLSWK
Q0DEV5	Granule-bound starch synthase 1, chloroplastic/amyloplastic OS=Oryza sativa subsp. japonica GN=WAXY PE=1 SV=1	67004	53.5	8.34	0.0004	10427	70.33	NCMNQDLSWK
Q0DEV5	Granule-bound starch synthase 1, chloroplastic/amyloplastic OS=Oryza sativa subsp. japonica GN=WAXY PE=1 SV=1	67004	53.5	8.34	0.0004	10428	67.98	NCMNQDLSWK
Q0DEV5	Granule-bound starch synthase 1, chloroplastic/amyloplastic OS=Oryza sativa subsp. japonica GN=WAXY PE=1 SV=1	67004	53.5	8.34	0.0007	10429	64.86	NCMNQDLSWK
Q0DEV5	Granule-bound starch synthase 1, chloroplastic/amyloplastic OS=Oryza sativa subsp. japonica GN=WAXY PE=1 SV=1	67004	53.5	8.34	0.0007	10430	67.72	NCMNQDLSWK
Q0DEV5	Granule-bound starch synthase 1, chloroplastic/amyloplastic OS=Oryza sativa subsp. japonica GN=WAXY PE=1 SV=1	67004	53.5	8.34	0.0017	10434	66.43	NCMNQDLSWK
Q0DEV5	Granule-bound starch synthase 1, chloroplastic/amyloplastic OS=Oryza sativa subsp. japonica GN=WAXY PE=1 SV=1	67004	53.5	8.34	-0.0037	10852	35.57	DAWDTSVVAEIK
Q0DEV5	Granule-bound starch synthase 1, chloroplastic/amyloplastic OS=Oryza sativa subsp. japonica GN=WAXY PE=1 SV=1	67004	53.5	8.34	-0.003	10853	29.68	DAWDTSVVAEIK
Q0DEV5	Granule-bound starch synthase 1, chloroplastic/amyloplastic OS=Oryza sativa subsp. japonica GN=WAXY PE=1 SV=1	67004	53.5	8.34	-0.0005	10854	60.04	DAWDTSVVAEIK
Q0DEV5	Granule-bound starch synthase 1, chloroplastic/amyloplastic OS=Oryza sativa subsp. japonica GN=WAXY PE=1 SV=1	67004	53.5	8.34	0	10855	80.37	DAWDTSVVAEIK
Q0DEV5	Granule-bound starch synthase 1, chloroplastic/amyloplastic OS=Oryza sativa subsp. japonica GN=WAXY PE=1 SV=1	67004	53.5	8.34	0	10856	61.41	DAWDTSVVAEIK
Q0DEV5	Granule-bound starch synthase 1, chloroplastic/amyloplastic OS=Oryza sativa subsp. japonica GN=WAXY PE=1 SV=1	67004	53.5	8.34	0.0002	10857	60.65	DAWDTSVVAEIK
Q0DEV5	Granule-bound starch synthase 1, chloroplastic/amyloplastic OS=Oryza sativa subsp. japonica GN=WAXY PE=1 SV=1	67004	53.5	8.34	0.0004	10858	67.17	DAWDTSVVAEIK
Q0DEV5	Granule-bound starch synthase 1, chloroplastic/amyloplastic OS=Oryza sativa subsp. japonica GN=WAXY PE=1 SV=1	67004	53.5	8.34	0.0014	10859	42.87	DAWDTSVVAEIK
Q0DEV5	Granule-bound starch synthase 1, chloroplastic/amyloplastic OS=Oryza sativa subsp. japonica GN=WAXY PE=1 SV=1	67004	53.5	8.34	-0.0009	11097	75.29	ILNLNNNPYFK
Q0DEV5	Granule-bound starch synthase 1, chloroplastic/amyloplastic OS=Oryza sativa subsp. japonica GN=WAXY PE=1 SV=1	67004	53.5	8.34	-0.0002	11098	74.4	ILNLNNNPYFK
Q0DEV5	Granule-bound starch synthase 1, chloroplastic/amyloplastic OS=Oryza sativa subsp. japonica GN=WAXY PE=1 SV=1	67004	53.5	8.34	-0.0002	11099	42.16	ILNLNNNPYFK
Q0DEV5	Granule-bound starch synthase 1, chloroplastic/amyloplastic OS=Oryza sativa subsp. japonica GN=WAXY PE=1 SV=1	67004	53.5	8.34	-0.0001	11100	48.69	ILNLNNNPYFK
Q0DEV5	Granule-bound starch synthase 1, chloroplastic/amyloplastic OS=Oryza sativa subsp. japonica GN=WAXY PE=1 SV=1	67004	53.5	8.34	0.0001	11101	54.19	ILNLNNNPYFK
Q0DEV5	Granule-bound starch synthase 1, chloroplastic/amyloplastic OS=Oryza sativa subsp. japonica GN=WAXY PE=1 SV=1	67004	53.5	8.34	0.0002	11102	74.87	ILNLNNNPYFK
Q0DEV5	Granule-bound starch synthase 1, chloroplastic/amyloplastic OS=Oryza sativa subsp. japonica GN=WAXY PE=1 SV=1	67004	53.5	8.34	0.0007	11103	40.23	ILNLNNNPYFK
Q0DEV5	Granule-bound starch synthase 1, chloroplastic/amyloplastic OS=Oryza sativa subsp. japonica GN=WAXY PE=1 SV=1	67004	53.5	8.34	-0.006	11112	31.8	VVGTPAYEEMVR
Q0DEV5	Granule-bound starch synthase 1, chloroplastic/amyloplastic OS=Oryza sativa subsp. japonica GN=WAXY PE=1 SV=1	67004	53.5	8.34	-0.0015	11113	41.9	VVGTPAYEEMVR
Q0DEV5	Granule-bound starch synthase 1, chloroplastic/amyloplastic OS=Oryza sativa subsp. japonica GN=WAXY PE=1 SV=1	67004	53.5	8.34	-0.0003	11115	73.19	VVGTPAYEEMVR
Q0DEV5	Granule-bound starch synthase 1, chloroplastic/amyloplastic OS=Oryza sativa subsp. japonica GN=WAXY PE=1 SV=1	67004	53.5	8.34	0	11116	58.01	VVGTPAYEEMVR
Q0DEV5	Granule-bound starch synthase 1, chloroplastic/amyloplastic OS=Oryza sativa subsp. japonica GN=WAXY PE=1 SV=1	67004	53.5	8.34	0.0006	11117	49.25	VVGTPAYEEMVR
Q0DEV5	Granule-bound starch synthase 1, chloroplastic/amyloplastic OS=Oryza sativa subsp. japonica GN=WAXY PE=1 SV=1	67004	53.5	8.34	0.0007	11118	52.92	VVGTPAYEEMVR
Q0DEV5	Granule-bound starch synthase 1, chloroplastic/amyloplastic OS=Oryza sativa subsp. japonica GN=WAXY PE=1 SV=1	67004	53.5	8.34	0.0009	11119	65.73	VVGTPAYEEMVR
Q0DEV5	Granule-bound starch synthase 1, chloroplastic/amyloplastic OS=Oryza sativa subsp. japonica GN=WAXY PE=1 SV=1	67004	53.5	8.34	-0.0014	11380	20.38	VVGTPAYEEMVR
Q0DEV5	Granule-bound starch synthase 1, chloroplastic/amyloplastic OS=Oryza sativa subsp. japonica GN=WAXY PE=1 SV=1	67004	53.5	8.34	-0.0003	11382	34.88	VVGTPAYEEMVR
Q0DEV5	Granule-bound starch synthase 1, chloroplastic/amyloplastic OS=Oryza sativa subsp. japonica GN=WAXY PE=1 SV=1	67004	53.5	8.34	-0.0002	11383	33.62	VVGTPAYEEMVR
Q0DEV5	Granule-bound starch synthase 1, chloroplastic/amyloplastic OS=Oryza sativa subsp. japonica GN=WAXY PE=1 SV=1	67004	53.5	8.34	-0.0001	11384	35.56	VVGTPAYEEMVR
Q0DEV5	Granule-bound starch synthase 1, chloroplastic/amyloplastic OS=Oryza sativa subsp. japonica GN=WAXY PE=1 SV=1	67004	53.5	8.34	-0.0001	11385	44.43	VVGTPAYEEMVR
Q0DEV5	Granule-bound starch synthase 1, chloroplastic/amyloplastic OS=Oryza sativa subsp. japonica GN=WAXY PE=1 SV=1	67004	53.5	8.34	-0.0001	11386	42.53	VVGTPAYEEMVR
Q0DEV5	Granule-bound starch synthase 1, chloroplastic/amyloplastic OS=Oryza sativa subsp. japonica GN=WAXY PE=1 SV=1	67004	53.5	8.34	0	11387	36.28	VVGTPAYEEMVR
Q0DEV5	Granule-bound starch synthase 1, chloroplastic/amyloplastic OS=Oryza sativa subsp. japonica GN=WAXY PE=1 SV=1	67004	53.5	8.34	0	11388	39.06	VVGTPAYEEMVR
Q0DEV5	Granule-bound starch synthase 1, chloroplastic/amyloplastic OS=Oryza sativa subsp. japonica GN=WAXY PE=1 SV=1	67004	53.5	8.34	0	11389	29.53	VVGTPAYEEMVR
Q0DEV5	Granule-bound starch synthase 1, chloroplastic/amyloplastic OS=Oryza sativa subsp. japonica GN=WAXY PE=1 SV=1	67004	53.5	8.34	0.0002	11390	36.56	VVGTPAYEEMVR
Q0DEV5	Granule-bound starch synthase 1, chloroplastic/amyloplastic OS=Oryza sativa subsp. japonica GN=WAXY PE=1 SV=1	67004	53.5	8.34	0.0003	11391	34.84	VVGTPAYEEMVR
Q0DEV5	Granule-bound starch synthase 1, chloroplastic/amyloplastic OS=Oryza sativa subsp. japonica GN=WAXY PE=1 SV=1	67004	53.5	8.34	0.0015	11394	25.63	VVGTPAYEEMVR
Q0DEV5	Granule-bound starch synthase 1, chloroplastic/amyloplastic OS=Oryza sativa subsp. japonica GN=WAXY PE=1 SV=1	67004	53.5	8.34	-0.0003	11413	60.79	EALQAEAGLPVDR
Q0DEV5	Granule-bound starch synthase 1, chloroplastic/amyloplastic OS=Oryza sativa subsp. japonica GN=WAXY PE=1 SV=1	67004	53.5	8.34	-0.0001	11414	61.82	EALQAEAGLPVDR
Q0DEV5	Granule-bound starch synthase 1, chloroplastic/amyloplastic OS=Oryza sativa subsp. japonica GN=WAXY PE=1 SV=1	67004	53.5	8.34	0	11417	61.98	EALQAEAGLPVDR
Q0DEV5	Granule-bound starch synthase 1, chloroplastic/amyloplastic OS=Oryza sativa subsp. japonica GN=WAXY PE=1 SV=1	67004	53.5	8.34	0.0001	11418	62.19	EALQAEAGLPVDR
Q0DEV5	Granule-bound starch synthase 1, chloroplastic/amyloplastic OS=Oryza sativa subsp. japonica GN=WAXY PE=1 SV=1	67004	53.5	8.34	0.0001	11419	61.75	EALQAEAGLPVDR
Q0DEV5	Granule-bound starch synthase 1, chloroplastic/amyloplastic OS=Oryza sativa subsp. japonica GN=WAXY PE=1 SV=1	67004	53.5	8.34	0.0002	11420	62.54	EALQAEAGLPVDR
Q0DEV5	Granule-bound starch synthase 1, chloroplastic/amyloplastic OS=Oryza sativa subsp. japonica GN=WAXY PE=1 SV=1	67004	53.5	8.34	0.0002	11421	32.14	EALQAEAGLPVDR
Q0DEV5	Granule-bound starch synthase 1, chloroplastic/amyloplastic OS=Oryza sativa subsp. japonica GN=WAXY PE=1 SV=1	67004	53.5	8.34	0.0003	11422	93.92	EALQAEAGLPVDR
Q0DEV5	Granule-bound starch synthase 1, chloroplastic/amyloplastic OS=Oryza sativa subsp. japonica GN=WAXY PE=1 SV=1	67004	53.5	8.34	0.0004	11423	27.12	EALQAEAGLPVDR
Q0DEV5	Granule-bound starch synthase 1, chloroplastic/amyloplastic OS=Oryza sativa subsp. japonica GN=WAXY PE=1 SV=1	67004	53.5	8.34	0.0005	11424	29.08	EALQAEAGLPVDR
Q0DEV5	Granule-bound starch synthase 1, chloroplastic/amyloplastic OS=Oryza sativa subsp. japonica GN=WAXY PE=1 SV=1	67004	53.5	8.34	0.0006	11425	62.34	EALQAEAGLPVDR
Q0DEV5	Granule-bound starch synthase 1, chloroplastic/amyloplastic OS=Oryza sativa subsp. japonica GN=WAXY PE=1 SV=1	67004	53.5	8.34	0.0006	11426	62.36	EALQAEAGLPVDR
Q0DEV5	Granule-bound starch synthase 1, chloroplastic/amyloplastic OS=Oryza sativa subsp. japonica GN=WAXY PE=1 SV=1	67004	53.5	8.34	0.0006	11427	44.43	EALQAEAGLPVDR
Q0DEV5	Granule-bound starch synthase 1, chloroplastic/amyloplastic OS=Oryza sativa subsp. japonica GN=WAXY PE=1 SV=1	67004	53.5	8.34	0.0007	11428	62.02	EALQAEAGLPVDR
Q0DEV5	Granule-bound starch synthase 1, chloroplastic/amyloplastic OS=Oryza sativa subsp. japonica GN=WAXY PE=1 SV=1	67004	53.5	8.34	0.0007	11429	39.8	EALQAEAGLPVDR
Q0DEV5	Granule-bound starch synthase 1, chloroplastic/amyloplastic OS=Oryza sativa subsp. japonica GN=WAXY PE=1 SV=1	67004	53.5	8.34	0.0007	11430	21.22	EALQAEAGLPVDR
Q0DEV5	Granule-bound starch synthase 1, chloroplastic/amyloplastic OS=Oryza sativa subsp. japonica GN=WAXY PE=1 SV=1	67004	53.5	8.34	0.0008	11431	31.47	EALQAEAGLPVDR
Q0DEV5	Granule-bound starch synthase 1, chloroplastic/amyloplastic OS=Oryza sativa subsp. japonica GN=WAXY PE=1 SV=1	67004	53.5	8.34	0.0008	11432	61.92	EALQAEAGLPVDR
Q0DEV5	Granule-bound starch synthase 1, chloroplastic/amyloplastic OS=Oryza sativa subsp. japonica GN=WAXY PE=1 SV=1	67004	53.5	8.34	0.0008	11433	66.83	EALQAEAGLPVDR
Q0DEV5	Granule-bound starch synthase 1, chloroplastic/amyloplastic OS=Oryza sativa subsp. japonica GN=WAXY PE=1 SV=1	67004	53.5	8.34	0.0009	11434	47.37	EALQAEAGLPVDR
Q0DEV5	Granule-bound starch synthase 1, chloroplastic/amyloplastic OS=Oryza sativa subsp. japonica GN=WAXY PE=1 SV=1	67004	53.5	8.34	0.002	11436	73.17	EALQAEAGLPVDR
Q0DEV5	Granule-bound starch synthase 1, chloroplastic/amyloplastic OS=Oryza sativa subsp. japonica GN=WAXY PE=1 SV=1	67004	53.5	8.34	-0.003	12642	91.36	FSLLCQAALEAPR
Q0DEV5	Granule-bound starch synthase 1, chloroplastic/amyloplastic OS=Oryza sativa subsp. japonica GN=WAXY PE=1 SV=1	67004	53.5	8.34	-0.0013	12643	63.5	FSLLCQAALEAPR
Q0DEV5	Granule-bound starch synthase 1, chloroplastic/amyloplastic OS=Oryza sativa subsp. japonica GN=WAXY PE=1 SV=1	67004	53.5	8.34	-0.0003	12645	25.72	FSLLCQAALEAPR
Q0DEV5	Granule-bound starch synthase 1, chloroplastic/amyloplastic OS=Oryza sativa subsp. japonica GN=WAXY PE=1 SV=1	67004	53.5	8.34	-0.0001	12647	80.38	FSLLCQAALEAPR
Q0DEV5	Granule-bound starch synthase 1, chloroplastic/amyloplastic OS=Oryza sativa subsp. japonica GN=WAXY PE=1 SV=1	67004	53.5	8.34	0	12648	81.12	FSLLCQAALEAPR
Q0DEV5	Granule-bound starch synthase 1, chloroplastic/amyloplastic OS=Oryza sativa subsp. japonica GN=WAXY PE=1 SV=1	67004	53.5	8.34	0.0003	12649	78.7	FSLLCQAALEAPR
Q0DEV5	Granule-bound starch synthase 1, chloroplastic/amyloplastic OS=Oryza sativa subsp. japonica GN=WAXY PE=1 SV=1	67004	53.5	8.34	0.0005	12650	84.99	FSLLCQAALEAPR
Q0DEV5	Granule-bound starch synthase 1, chloroplastic/amyloplastic OS=Oryza sativa subsp. japonica GN=WAXY PE=1 SV=1	67004	53.5	8.34	0.0006	12651	45.9	FSLLCQAALEAPR
Q0DEV5	Granule-bound starch synthase 1, chloroplastic/amyloplastic OS=Oryza sativa subsp. japonica GN=WAXY PE=1 SV=1	67004	53.5	8.34	0.0006	12653	72.46	FSLLCQAALEAPR
Q0DEV5	Granule-bound starch synthase 1, chloroplastic/amyloplastic OS=Oryza sativa subsp. japonica GN=WAXY PE=1 SV=1	67004	53.5	8.34	-0.0021	12820	35.21	EALQAEAGLPVDRK
Q0DEV5	Granule-bound starch synthase 1, chloroplastic/amyloplastic OS=Oryza sativa subsp. japonica GN=WAXY PE=1 SV=1	67004	53.5	8.34	-0.0012	12821	73.45	EALQAEAGLPVDRK
Q0DEV5	Granule-bound starch synthase 1, chloroplastic/amyloplastic OS=Oryza sativa subsp. japonica GN=WAXY PE=1 SV=1	67004	53.5	8.34	0.0008	12823	56.22	EALQAEAGLPVDRK
Q0DEV5	Granule-bound starch synthase 1, chloroplastic/amyloplastic OS=Oryza sativa subsp. japonica GN=WAXY PE=1 SV=1	67004	53.5	8.34	-0.0063	13189	51.96	FEPCGLIQLQGMR
Q0DEV5	Granule-bound starch synthase 1, chloroplastic/amyloplastic OS=Oryza sativa subsp. japonica GN=WAXY PE=1 SV=1	67004	53.5	8.34	-0.0019	13190	51.58	FEPCGLIQLQGMR
Q0DEV5	Granule-bound starch synthase 1, chloroplastic/amyloplastic OS=Oryza sativa subsp. japonica GN=WAXY PE=1 SV=1	67004	53.5	8.34	-0.0005	13191	60.73	FEPCGLIQLQGMR
Q0DEV5	Granule-bound starch synthase 1, chloroplastic/amyloplastic OS=Oryza sativa subsp. japonica GN=WAXY PE=1 SV=1	67004	53.5	8.34	0	13192	61.39	FEPCGLIQLQGMR
Q0DEV5	Granule-bound starch synthase 1, chloroplastic/amyloplastic OS=Oryza sativa subsp. japonica GN=WAXY PE=1 SV=1	67004	53.5	8.34	0.0003	13193	60.63	FEPCGLIQLQGMR
Q0DEV5	Granule-bound starch synthase 1, chloroplastic/amyloplastic OS=Oryza sativa subsp. japonica GN=WAXY PE=1 SV=1	67004	53.5	8.34	0.0004	13194	64.99	FEPCGLIQLQGMR
Q0DEV5	Granule-bound starch synthase 1, chloroplastic/amyloplastic OS=Oryza sativa subsp. japonica GN=WAXY PE=1 SV=1	67004	53.5	8.34	0.0004	13195	64.96	FEPCGLIQLQGMR
Q0DEV5	Granule-bound starch synthase 1, chloroplastic/amyloplastic OS=Oryza sativa subsp. japonica GN=WAXY PE=1 SV=1	67004	53.5	8.34	0.0008	13196	60.31	FEPCGLIQLQGMR
Q0DEV5	Granule-bound starch synthase 1, chloroplastic/amyloplastic OS=Oryza sativa subsp. japonica GN=WAXY PE=1 SV=1	67004	53.5	8.34	-0.0009	13347	52.4	FEPCGLIQLQGMR
Q0DEV5	Granule-bound starch synthase 1, chloroplastic/amyloplastic OS=Oryza sativa subsp. japonica GN=WAXY PE=1 SV=1	67004	53.5	8.34	-0.0004	13348	51.91	FEPCGLIQLQGMR
Q0DEV5	Granule-bound starch synthase 1, chloroplastic/amyloplastic OS=Oryza sativa subsp. japonica GN=WAXY PE=1 SV=1	67004	53.5	8.34	-0.0001	13349	64.71	FEPCGLIQLQGMR
Q0DEV5	Granule-bound starch synthase 1, chloroplastic/amyloplastic OS=Oryza sativa subsp. japonica GN=WAXY PE=1 SV=1	67004	53.5	8.34	0.0007	13350	41.36	FEPCGLIQLQGMR
Q0DEV5	Granule-bound starch synthase 1, chloroplastic/amyloplastic OS=Oryza sativa subsp. japonica GN=WAXY PE=1 SV=1	67004	53.5	8.34	0.0027	13351	32.16	FEPCGLIQLQGMR
Q0DEV5	Granule-bound starch synthase 1, chloroplastic/amyloplastic OS=Oryza sativa subsp. japonica GN=WAXY PE=1 SV=1	67004	53.5	8.34	0.0029	13352	22.52	FEPCGLIQLQGMR
Q0DEV5	Granule-bound starch synthase 1, chloroplastic/amyloplastic OS=Oryza sativa subsp. japonica GN=WAXY PE=1 SV=1	67004	53.5	8.34	-0.0014	14080	51.34	NCMNQDLSWKGPAK
Q0DEV5	Granule-bound starch synthase 1, chloroplastic/amyloplastic OS=Oryza sativa subsp. japonica GN=WAXY PE=1 SV=1	67004	53.5	8.34	-0.0011	14081	74.22	NCMNQDLSWKGPAK
Q0DEV5	Granule-bound starch synthase 1, chloroplastic/amyloplastic OS=Oryza sativa subsp. japonica GN=WAXY PE=1 SV=1	67004	53.5	8.34	0.0024	14181	32.82	AIKVVGTPAYEEMVR
Q0DEV5	Granule-bound starch synthase 1, chloroplastic/amyloplastic OS=Oryza sativa subsp. japonica GN=WAXY PE=1 SV=1	67004	53.5	8.34	0.0004	14193	55.15	NCMNQDLSWKGPAK
Q0DEV5	Granule-bound starch synthase 1, chloroplastic/amyloplastic OS=Oryza sativa subsp. japonica GN=WAXY PE=1 SV=1	67004	53.5	8.34	0.0005	14194	49.28	NCMNQDLSWKGPAK
Q0DEV5	Granule-bound starch synthase 1, chloroplastic/amyloplastic OS=Oryza sativa subsp. japonica GN=WAXY PE=1 SV=1	67004	53.5	8.34	-0.0015	14520	75.69	FAFEDYPELNLSER
Q0DEV5	Granule-bound starch synthase 1, chloroplastic/amyloplastic OS=Oryza sativa subsp. japonica GN=WAXY PE=1 SV=1	67004	53.5	8.34	-0.0002	14521	83.31	FAFEDYPELNLSER
Q0DEV5	Granule-bound starch synthase 1, chloroplastic/amyloplastic OS=Oryza sativa subsp. japonica GN=WAXY PE=1 SV=1	67004	53.5	8.34	0	14522	80.22	FAFEDYPELNLSER
Q0DEV5	Granule-bound starch synthase 1, chloroplastic/amyloplastic OS=Oryza sativa subsp. japonica GN=WAXY PE=1 SV=1	67004	53.5	8.34	0.0003	14523	67.05	FAFEDYPELNLSER
Q0DEV5	Granule-bound starch synthase 1, chloroplastic/amyloplastic OS=Oryza sativa subsp. japonica GN=WAXY PE=1 SV=1	67004	53.5	8.34	0.0007	14524	60.69	FAFEDYPELNLSER
Q0DEV5	Granule-bound starch synthase 1, chloroplastic/amyloplastic OS=Oryza sativa subsp. japonica GN=WAXY PE=1 SV=1	67004	53.5	8.34	-0.0025	15027	99.04	ALNKEALQAEAGLPVDR
Q0DEV5	Granule-bound starch synthase 1, chloroplastic/amyloplastic OS=Oryza sativa subsp. japonica GN=WAXY PE=1 SV=1	67004	53.5	8.34	-0.0009	15028	62.52	ALNKEALQAEAGLPVDR
Q0DEV5	Granule-bound starch synthase 1, chloroplastic/amyloplastic OS=Oryza sativa subsp. japonica GN=WAXY PE=1 SV=1	67004	53.5	8.34	-0.0003	15029	99.34	ALNKEALQAEAGLPVDR
Q0DEV5	Granule-bound starch synthase 1, chloroplastic/amyloplastic OS=Oryza sativa subsp. japonica GN=WAXY PE=1 SV=1	67004	53.5	8.34	-0.0002	15030	79.86	ALNKEALQAEAGLPVDR
Q0DEV5	Granule-bound starch synthase 1, chloroplastic/amyloplastic OS=Oryza sativa subsp. japonica GN=WAXY PE=1 SV=1	67004	53.5	8.34	0.0004	15031	42.01	ALNKEALQAEAGLPVDR
Q0DEV5	Granule-bound starch synthase 1, chloroplastic/amyloplastic OS=Oryza sativa subsp. japonica GN=WAXY PE=1 SV=1	67004	53.5	8.34	0.0006	15032	49.64	ALNKEALQAEAGLPVDR
Q0DEV5	Granule-bound starch synthase 1, chloroplastic/amyloplastic OS=Oryza sativa subsp. japonica GN=WAXY PE=1 SV=1	67004	53.5	8.34	0.0006	15033	39.41	ALNKEALQAEAGLPVDR
Q0DEV5	Granule-bound starch synthase 1, chloroplastic/amyloplastic OS=Oryza sativa subsp. japonica GN=WAXY PE=1 SV=1	67004	53.5	8.34	0.0007	15034	41.59	ALNKEALQAEAGLPVDR
Q0DEV5	Granule-bound starch synthase 1, chloroplastic/amyloplastic OS=Oryza sativa subsp. japonica GN=WAXY PE=1 SV=1	67004	53.5	8.34	0.0007	15035	37.61	ALNKEALQAEAGLPVDR
Q0DEV5	Granule-bound starch synthase 1, chloroplastic/amyloplastic OS=Oryza sativa subsp. japonica GN=WAXY PE=1 SV=1	67004	53.5	8.34	0.0014	15036	76.36	ALNKEALQAEAGLPVDR
Q0DEV5	Granule-bound starch synthase 1, chloroplastic/amyloplastic OS=Oryza sativa subsp. japonica GN=WAXY PE=1 SV=1	67004	53.5	8.34	0.0019	15037	79.85	ALNKEALQAEAGLPVDR
Q0DEV5	Granule-bound starch synthase 1, chloroplastic/amyloplastic OS=Oryza sativa subsp. japonica GN=WAXY PE=1 SV=1	67004	53.5	8.34	0.0019	15038	78.35	ALNKEALQAEAGLPVDR
Q0DEV5	Granule-bound starch synthase 1, chloroplastic/amyloplastic OS=Oryza sativa subsp. japonica GN=WAXY PE=1 SV=1	67004	53.5	8.34	-0.002	15071	80.48	SSFDFIDGYDTPVEGR
Q0DEV5	Granule-bound starch synthase 1, chloroplastic/amyloplastic OS=Oryza sativa subsp. japonica GN=WAXY PE=1 SV=1	67004	53.5	8.34	-0.0005	15072	76.66	SSFDFIDGYDTPVEGR
Q0DEV5	Granule-bound starch synthase 1, chloroplastic/amyloplastic OS=Oryza sativa subsp. japonica GN=WAXY PE=1 SV=1	67004	53.5	8.34	-0.0004	15073	63.14	SSFDFIDGYDTPVEGR
Q0DEV5	Granule-bound starch synthase 1, chloroplastic/amyloplastic OS=Oryza sativa subsp. japonica GN=WAXY PE=1 SV=1	67004	53.5	8.34	-0.0002	15074	87.75	SSFDFIDGYDTPVEGR
Q0DEV5	Granule-bound starch synthase 1, chloroplastic/amyloplastic OS=Oryza sativa subsp. japonica GN=WAXY PE=1 SV=1	67004	53.5	8.34	0	15075	95.44	SSFDFIDGYDTPVEGR
Q0DEV5	Granule-bound starch synthase 1, chloroplastic/amyloplastic OS=Oryza sativa subsp. japonica GN=WAXY PE=1 SV=1	67004	53.5	8.34	0	15076	87.41	SSFDFIDGYDTPVEGR
Q0DEV5	Granule-bound starch synthase 1, chloroplastic/amyloplastic OS=Oryza sativa subsp. japonica GN=WAXY PE=1 SV=1	67004	53.5	8.34	0.0001	15077	95.21	SSFDFIDGYDTPVEGR
Q0DEV5	Granule-bound starch synthase 1, chloroplastic/amyloplastic OS=Oryza sativa subsp. japonica GN=WAXY PE=1 SV=1	67004	53.5	8.34	0.0001	15078	81.84	SSFDFIDGYDTPVEGR
Q0DEV5	Granule-bound starch synthase 1, chloroplastic/amyloplastic OS=Oryza sativa subsp. japonica GN=WAXY PE=1 SV=1	67004	53.5	8.34	0.0001	15079	68.53	SSFDFIDGYDTPVEGR
Q0DEV5	Granule-bound starch synthase 1, chloroplastic/amyloplastic OS=Oryza sativa subsp. japonica GN=WAXY PE=1 SV=1	67004	53.5	8.34	0.0009	15080	31.54	SSFDFIDGYDTPVEGR
Q0DEV5	Granule-bound starch synthase 1, chloroplastic/amyloplastic OS=Oryza sativa subsp. japonica GN=WAXY PE=1 SV=1	67004	53.5	8.34	0.0013	15081	61.51	SSFDFIDGYDTPVEGR
Q0DEV5	Granule-bound starch synthase 1, chloroplastic/amyloplastic OS=Oryza sativa subsp. japonica GN=WAXY PE=1 SV=1	67004	53.5	8.34	-0.0034	15275	82.6	IYGPDTGVDYKDNQMR
Q0DEV5	Granule-bound starch synthase 1, chloroplastic/amyloplastic OS=Oryza sativa subsp. japonica GN=WAXY PE=1 SV=1	67004	53.5	8.34	-0.0023	15276	84.01	IYGPDTGVDYKDNQMR
Q0DEV5	Granule-bound starch synthase 1, chloroplastic/amyloplastic OS=Oryza sativa subsp. japonica GN=WAXY PE=1 SV=1	67004	53.5	8.34	-0.0019	15277	83.11	IYGPDTGVDYKDNQMR
Q0DEV5	Granule-bound starch synthase 1, chloroplastic/amyloplastic OS=Oryza sativa subsp. japonica GN=WAXY PE=1 SV=1	67004	53.5	8.34	-0.0018	15278	64.82	IYGPDTGVDYKDNQMR
Q0DEV5	Granule-bound starch synthase 1, chloroplastic/amyloplastic OS=Oryza sativa subsp. japonica GN=WAXY PE=1 SV=1	67004	53.5	8.34	-0.0012	15279	38.94	IYGPDTGVDYKDNQMR
Q0DEV5	Granule-bound starch synthase 1, chloroplastic/amyloplastic OS=Oryza sativa subsp. japonica GN=WAXY PE=1 SV=1	67004	53.5	8.34	-0.0007	15280	74.04	IYGPDTGVDYKDNQMR
Q0DEV5	Granule-bound starch synthase 1, chloroplastic/amyloplastic OS=Oryza sativa subsp. japonica GN=WAXY PE=1 SV=1	67004	53.5	8.34	-0.0004	15281	55.84	IYGPDTGVDYKDNQMR
Q0DEV5	Granule-bound starch synthase 1, chloroplastic/amyloplastic OS=Oryza sativa subsp. japonica GN=WAXY PE=1 SV=1	67004	53.5	8.34	-0.0003	15282	61.24	IYGPDTGVDYKDNQMR
Q0DEV5	Granule-bound starch synthase 1, chloroplastic/amyloplastic OS=Oryza sativa subsp. japonica GN=WAXY PE=1 SV=1	67004	53.5	8.34	-0.0003	15283	47.55	IYGPDTGVDYKDNQMR
Q0DEV5	Granule-bound starch synthase 1, chloroplastic/amyloplastic OS=Oryza sativa subsp. japonica GN=WAXY PE=1 SV=1	67004	53.5	8.34	0.0001	15284	60.52	IYGPDTGVDYKDNQMR
Q0DEV5	Granule-bound starch synthase 1, chloroplastic/amyloplastic OS=Oryza sativa subsp. japonica GN=WAXY PE=1 SV=1	67004	53.5	8.34	0.0004	15285	80.04	IYGPDTGVDYKDNQMR
Q0DEV5	Granule-bound starch synthase 1, chloroplastic/amyloplastic OS=Oryza sativa subsp. japonica GN=WAXY PE=1 SV=1	67004	53.5	8.34	0.0007	15286	41.73	IYGPDTGVDYKDNQMR
Q0DEV5	Granule-bound starch synthase 1, chloroplastic/amyloplastic OS=Oryza sativa subsp. japonica GN=WAXY PE=1 SV=1	67004	53.5	8.34	0.0007	15287	55.35	IYGPDTGVDYKDNQMR
Q0DEV5	Granule-bound starch synthase 1, chloroplastic/amyloplastic OS=Oryza sativa subsp. japonica GN=WAXY PE=1 SV=1	67004	53.5	8.34	0.0013	15288	72.97	IYGPDTGVDYKDNQMR
Q0DEV5	Granule-bound starch synthase 1, chloroplastic/amyloplastic OS=Oryza sativa subsp. japonica GN=WAXY PE=1 SV=1	67004	53.5	8.34	-0.0032	15331	34.1	IYGPDTGVDYKDNQMR
Q0DEV5	Granule-bound starch synthase 1, chloroplastic/amyloplastic OS=Oryza sativa subsp. japonica GN=WAXY PE=1 SV=1	67004	53.5	8.34	-0.001	15332	58.44	IYGPDTGVDYKDNQMR
Q0DEV5	Granule-bound starch synthase 1, chloroplastic/amyloplastic OS=Oryza sativa subsp. japonica GN=WAXY PE=1 SV=1	67004	53.5	8.34	-0.0007	15333	33.61	IYGPDTGVDYKDNQMR
Q0DEV5	Granule-bound starch synthase 1, chloroplastic/amyloplastic OS=Oryza sativa subsp. japonica GN=WAXY PE=1 SV=1	67004	53.5	8.34	0.0001	15334	58.18	IYGPDTGVDYKDNQMR
Q0DEV5	Granule-bound starch synthase 1, chloroplastic/amyloplastic OS=Oryza sativa subsp. japonica GN=WAXY PE=1 SV=1	67004	53.5	8.34	0.0003	15335	51.36	IYGPDTGVDYKDNQMR
Q0DEV5	Granule-bound starch synthase 1, chloroplastic/amyloplastic OS=Oryza sativa subsp. japonica GN=WAXY PE=1 SV=1	67004	53.5	8.34	0.0004	15336	33.97	IYGPDTGVDYKDNQMR
Q0DEV5	Granule-bound starch synthase 1, chloroplastic/amyloplastic OS=Oryza sativa subsp. japonica GN=WAXY PE=1 SV=1	67004	53.5	8.34	0.0011	15337	35.89	IYGPDTGVDYKDNQMR
Q0DEV5	Granule-bound starch synthase 1, chloroplastic/amyloplastic OS=Oryza sativa subsp. japonica GN=WAXY PE=1 SV=1	67004	53.5	8.34	0.0011	15338	27.99	IYGPDTGVDYKDNQMR
Q0DEV5	Granule-bound starch synthase 1, chloroplastic/amyloplastic OS=Oryza sativa subsp. japonica GN=WAXY PE=1 SV=1	67004	53.5	8.34	0.0007	15405	62.2	ALNKEALQAEAGLPVDRK
Q0DEV5	Granule-bound starch synthase 1, chloroplastic/amyloplastic OS=Oryza sativa subsp. japonica GN=WAXY PE=1 SV=1	67004	53.5	8.34	-0.0027	15524	66.15	VLTVSPYYAEELISGIAR
Q0DEV5	Granule-bound starch synthase 1, chloroplastic/amyloplastic OS=Oryza sativa subsp. japonica GN=WAXY PE=1 SV=1	67004	53.5	8.34	-0.0016	15525	112.79	VLTVSPYYAEELISGIAR
Q0DEV5	Granule-bound starch synthase 1, chloroplastic/amyloplastic OS=Oryza sativa subsp. japonica GN=WAXY PE=1 SV=1	67004	53.5	8.34	-0.0011	15526	67.96	VLTVSPYYAEELISGIAR
Q0DEV5	Granule-bound starch synthase 1, chloroplastic/amyloplastic OS=Oryza sativa subsp. japonica GN=WAXY PE=1 SV=1	67004	53.5	8.34	0.0009	15528	113.76	VLTVSPYYAEELISGIAR
Q0DEV5	Granule-bound starch synthase 1, chloroplastic/amyloplastic OS=Oryza sativa subsp. japonica GN=WAXY PE=1 SV=1	67004	53.5	8.34	0.0013	15529	119.13	VLTVSPYYAEELISGIAR
Q0DEV5	Granule-bound starch synthase 1, chloroplastic/amyloplastic OS=Oryza sativa subsp. japonica GN=WAXY PE=1 SV=1	67004	53.5	8.34	0.0024	15530	119.19	VLTVSPYYAEELISGIAR
Q0DEV5	Granule-bound starch synthase 1, chloroplastic/amyloplastic OS=Oryza sativa subsp. japonica GN=WAXY PE=1 SV=1	67004	53.5	8.34	0.0025	15531	30.54	VLTVSPYYAEELISGIAR
Q0DEV5	Granule-bound starch synthase 1, chloroplastic/amyloplastic OS=Oryza sativa subsp. japonica GN=WAXY PE=1 SV=1	67004	53.5	8.34	0.0047	15532	100.56	VLTVSPYYAEELISGIAR
Q0DEV5	Granule-bound starch synthase 1, chloroplastic/amyloplastic OS=Oryza sativa subsp. japonica GN=WAXY PE=1 SV=1	67004	53.5	8.34	-0.005	15677	24.32	YDQYKDAWDTSVVAEIK
Q0DEV5	Granule-bound starch synthase 1, chloroplastic/amyloplastic OS=Oryza sativa subsp. japonica GN=WAXY PE=1 SV=1	67004	53.5	8.34	-0.0043	15678	20.35	YDQYKDAWDTSVVAEIK
Q0DEV5	Granule-bound starch synthase 1, chloroplastic/amyloplastic OS=Oryza sativa subsp. japonica GN=WAXY PE=1 SV=1	67004	53.5	8.34	-0.0039	15679	64.42	YDQYKDAWDTSVVAEIK
Q0DEV5	Granule-bound starch synthase 1, chloroplastic/amyloplastic OS=Oryza sativa subsp. japonica GN=WAXY PE=1 SV=1	67004	53.5	8.34	-0.0011	15681	31.27	YDQYKDAWDTSVVAEIK
Q0DEV5	Granule-bound starch synthase 1, chloroplastic/amyloplastic OS=Oryza sativa subsp. japonica GN=WAXY PE=1 SV=1	67004	53.5	8.34	-0.0002	15682	63.53	YDQYKDAWDTSVVAEIK
Q0DEV5	Granule-bound starch synthase 1, chloroplastic/amyloplastic OS=Oryza sativa subsp. japonica GN=WAXY PE=1 SV=1	67004	53.5	8.34	-0.0056	15891	127.33	LTGITGIVNGMDVSEWDPSK
Q0DEV5	Granule-bound starch synthase 1, chloroplastic/amyloplastic OS=Oryza sativa subsp. japonica GN=WAXY PE=1 SV=1	67004	53.5	8.34	-0.0059	15942	47.81	YGTPCACASTGGLVDTVIEGK
Q0DEV5	Granule-bound starch synthase 1, chloroplastic/amyloplastic OS=Oryza sativa subsp. japonica GN=WAXY PE=1 SV=1	67004	53.5	8.34	-0.0037	15943	43.75	YGTPCACASTGGLVDTVIEGK
Q0DEV5	Granule-bound starch synthase 1, chloroplastic/amyloplastic OS=Oryza sativa subsp. japonica GN=WAXY PE=1 SV=1	67004	53.5	8.34	-0.0033	15944	37.22	YGTPCACASTGGLVDTVIEGK
Q0DEV5	Granule-bound starch synthase 1, chloroplastic/amyloplastic OS=Oryza sativa subsp. japonica GN=WAXY PE=1 SV=1	67004	53.5	8.34	-0.0026	15945	47.73	YGTPCACASTGGLVDTVIEGK
Q0DEV5	Granule-bound starch synthase 1, chloroplastic/amyloplastic OS=Oryza sativa subsp. japonica GN=WAXY PE=1 SV=1	67004	53.5	8.34	-0.0022	15946	64.22	YGTPCACASTGGLVDTVIEGK
Q0DEV5	Granule-bound starch synthase 1, chloroplastic/amyloplastic OS=Oryza sativa subsp. japonica GN=WAXY PE=1 SV=1	67004	53.5	8.34	-0.0018	15947	104.45	YGTPCACASTGGLVDTVIEGK
Q0DEV5	Granule-bound starch synthase 1, chloroplastic/amyloplastic OS=Oryza sativa subsp. japonica GN=WAXY PE=1 SV=1	67004	53.5	8.34	-0.001	15948	140.22	YGTPCACASTGGLVDTVIEGK
Q0DEV5	Granule-bound starch synthase 1, chloroplastic/amyloplastic OS=Oryza sativa subsp. japonica GN=WAXY PE=1 SV=1	67004	53.5	8.34	-0.0008	15949	90.55	YGTPCACASTGGLVDTVIEGK
Q0DEV5	Granule-bound starch synthase 1, chloroplastic/amyloplastic OS=Oryza sativa subsp. japonica GN=WAXY PE=1 SV=1	67004	53.5	8.34	-0.0008	15950	106.97	YGTPCACASTGGLVDTVIEGK
Q0DEV5	Granule-bound starch synthase 1, chloroplastic/amyloplastic OS=Oryza sativa subsp. japonica GN=WAXY PE=1 SV=1	67004	53.5	8.34	-0.0007	15951	64.95	YGTPCACASTGGLVDTVIEGK
Q0DEV5	Granule-bound starch synthase 1, chloroplastic/amyloplastic OS=Oryza sativa subsp. japonica GN=WAXY PE=1 SV=1	67004	53.5	8.34	-0.0006	15952	86.84	YGTPCACASTGGLVDTVIEGK
Q0DEV5	Granule-bound starch synthase 1, chloroplastic/amyloplastic OS=Oryza sativa subsp. japonica GN=WAXY PE=1 SV=1	67004	53.5	8.34	-0.0003	15953	83.03	YGTPCACASTGGLVDTVIEGK
Q0DEV5	Granule-bound starch synthase 1, chloroplastic/amyloplastic OS=Oryza sativa subsp. japonica GN=WAXY PE=1 SV=1	67004	53.5	8.34	-0.0003	15954	105.87	YGTPCACASTGGLVDTVIEGK
Q0DEV5	Granule-bound starch synthase 1, chloroplastic/amyloplastic OS=Oryza sativa subsp. japonica GN=WAXY PE=1 SV=1	67004	53.5	8.34	-0.0001	15955	93.68	YGTPCACASTGGLVDTVIEGK
Q0DEV5	Granule-bound starch synthase 1, chloroplastic/amyloplastic OS=Oryza sativa subsp. japonica GN=WAXY PE=1 SV=1	67004	53.5	8.34	-0.0001	15956	125.41	YGTPCACASTGGLVDTVIEGK
Q0DEV5	Granule-bound starch synthase 1, chloroplastic/amyloplastic OS=Oryza sativa subsp. japonica GN=WAXY PE=1 SV=1	67004	53.5	8.34	0.0009	15957	115.75	YGTPCACASTGGLVDTVIEGK
Q0DEV5	Granule-bound starch synthase 1, chloroplastic/amyloplastic OS=Oryza sativa subsp. japonica GN=WAXY PE=1 SV=1	67004	53.5	8.34	0.0014	15958	98.67	YGTPCACASTGGLVDTVIEGK
Q0DEV5	Granule-bound starch synthase 1, chloroplastic/amyloplastic OS=Oryza sativa subsp. japonica GN=WAXY PE=1 SV=1	67004	53.5	8.34	0.0026	15959	50.87	YGTPCACASTGGLVDTVIEGK
Q0DEV5	Granule-bound starch synthase 1, chloroplastic/amyloplastic OS=Oryza sativa subsp. japonica GN=WAXY PE=1 SV=1	67004	53.5	8.34	0.0026	15960	107.99	YGTPCACASTGGLVDTVIEGK
Q0DEV5	Granule-bound starch synthase 1, chloroplastic/amyloplastic OS=Oryza sativa subsp. japonica GN=WAXY PE=1 SV=1	67004	53.5	8.34	0.0038	15961	146.48	YGTPCACASTGGLVDTVIEGK
Q0DEV5	Granule-bound starch synthase 1, chloroplastic/amyloplastic OS=Oryza sativa subsp. japonica GN=WAXY PE=1 SV=1	67004	53.5	8.34	0.0043	15962	134.23	YGTPCACASTGGLVDTVIEGK
Q0DEV5	Granule-bound starch synthase 1, chloroplastic/amyloplastic OS=Oryza sativa subsp. japonica GN=WAXY PE=1 SV=1	67004	53.5	8.34	0.0051	15963	52.34	YGTPCACASTGGLVDTVIEGK
Q0DEV5	Granule-bound starch synthase 1, chloroplastic/amyloplastic OS=Oryza sativa subsp. japonica GN=WAXY PE=1 SV=1	67004	53.5	8.34	0.0107	15964	73.61	YGTPCACASTGGLVDTVIEGK
Q0DEV5	Granule-bound starch synthase 1, chloroplastic/amyloplastic OS=Oryza sativa subsp. japonica GN=WAXY PE=1 SV=1	67004	53.5	8.34	-0.0025	16492	104.03	NWENVLLGLGVAGSAPGIEGDEIAPLAK
Q0DEV5	Granule-bound starch synthase 1, chloroplastic/amyloplastic OS=Oryza sativa subsp. japonica GN=WAXY PE=1 SV=1	67004	53.5	8.34	0.0038	16493	102.64	NWENVLLGLGVAGSAPGIEGDEIAPLAK
Q2QV45	70 kDa heat shock protein OS=Oryza sativa subsp. japonica GN=LOC_Os12g14070 PE=2 SV=1	74269	45.6	5.11	-0.001	2432	61.89	IAGLEVLR
Q2QV45	70 kDa heat shock protein OS=Oryza sativa subsp. japonica GN=LOC_Os12g14070 PE=2 SV=1	74269	45.6	5.11	-0.0011	2437	27.92	TPVTNALR
Q2QV45	70 kDa heat shock protein OS=Oryza sativa subsp. japonica GN=LOC_Os12g14070 PE=2 SV=1	74269	45.6	5.11	-0.0009	2438	25.46	TPVTNALR
Q2QV45	70 kDa heat shock protein OS=Oryza sativa subsp. japonica GN=LOC_Os12g14070 PE=2 SV=1	74269	45.6	5.11	-0.0006	2439	20.15	TPVTNALR
Q2QV45	70 kDa heat shock protein OS=Oryza sativa subsp. japonica GN=LOC_Os12g14070 PE=2 SV=1	74269	45.6	5.11	0	2443	22.42	TPVTNALR
Q2QV45	70 kDa heat shock protein OS=Oryza sativa subsp. japonica GN=LOC_Os12g14070 PE=2 SV=1	74269	45.6	5.11	0	2444	41.89	TPVTNALR
Q2QV45	70 kDa heat shock protein OS=Oryza sativa subsp. japonica GN=LOC_Os12g14070 PE=2 SV=1	74269	45.6	5.11	0.0003	2445	21.22	TPVTNALR
Q2QV45	70 kDa heat shock protein OS=Oryza sativa subsp. japonica GN=LOC_Os12g14070 PE=2 SV=1	74269	45.6	5.11	-0.0005	2484	23.54	LDCPAIGK
Q2QV45	70 kDa heat shock protein OS=Oryza sativa subsp. japonica GN=LOC_Os12g14070 PE=2 SV=1	74269	45.6	5.11	-0.0004	2485	47.8	LDCPAIGK
Q2QV45	70 kDa heat shock protein OS=Oryza sativa subsp. japonica GN=LOC_Os12g14070 PE=2 SV=1	74269	45.6	5.11	-0.0002	2487	22.05	LDCPAIGK
Q2QV45	70 kDa heat shock protein OS=Oryza sativa subsp. japonica GN=LOC_Os12g14070 PE=2 SV=1	74269	45.6	5.11	-0.0001	2488	47.18	LDCPAIGK
Q2QV45	70 kDa heat shock protein OS=Oryza sativa subsp. japonica GN=LOC_Os12g14070 PE=2 SV=1	74269	45.6	5.11	0	2489	51.91	LDCPAIGK
Q2QV45	70 kDa heat shock protein OS=Oryza sativa subsp. japonica GN=LOC_Os12g14070 PE=2 SV=1	74269	45.6	5.11	0	2490	31.94	LDCPAIGK
Q2QV45	70 kDa heat shock protein OS=Oryza sativa subsp. japonica GN=LOC_Os12g14070 PE=2 SV=1	74269	45.6	5.11	0	2491	54.15	LDCPAIGK
Q2QV45	70 kDa heat shock protein OS=Oryza sativa subsp. japonica GN=LOC_Os12g14070 PE=2 SV=1	74269	45.6	5.11	0	2492	47.12	LDCPAIGK
Q2QV45	70 kDa heat shock protein OS=Oryza sativa subsp. japonica GN=LOC_Os12g14070 PE=2 SV=1	74269	45.6	5.11	0	2493	48.04	LDCPAIGK
Q2QV45	70 kDa heat shock protein OS=Oryza sativa subsp. japonica GN=LOC_Os12g14070 PE=2 SV=1	74269	45.6	5.11	0.0001	2495	40.71	LDCPAIGK
Q2QV45	70 kDa heat shock protein OS=Oryza sativa subsp. japonica GN=LOC_Os12g14070 PE=2 SV=1	74269	45.6	5.11	0.0002	2497	20.13	LDCPAIGK
Q2QV45	70 kDa heat shock protein OS=Oryza sativa subsp. japonica GN=LOC_Os12g14070 PE=2 SV=1	74269	45.6	5.11	0.0003	2498	49.85	LDCPAIGK
Q2QV45	70 kDa heat shock protein OS=Oryza sativa subsp. japonica GN=LOC_Os12g14070 PE=2 SV=1	74269	45.6	5.11	0.0003	2499	48.08	LDCPAIGK
Q2QV45	70 kDa heat shock protein OS=Oryza sativa subsp. japonica GN=LOC_Os12g14070 PE=2 SV=1	74269	45.6	5.11	-0.001	3688	31.98	HIETTLSR
Q2QV45	70 kDa heat shock protein OS=Oryza sativa subsp. japonica GN=LOC_Os12g14070 PE=2 SV=1	74269	45.6	5.11	0.0006	4713	85.3	MAEVDDEAK
Q2QV45	70 kDa heat shock protein OS=Oryza sativa subsp. japonica GN=LOC_Os12g14070 PE=2 SV=1	74269	45.6	5.11	0.0009	4714	63.39	MAEVDDEAK
Q2QV45	70 kDa heat shock protein OS=Oryza sativa subsp. japonica GN=LOC_Os12g14070 PE=2 SV=1	74269	45.6	5.11	0.0003	4836	45.8	IPSVQELVK
Q2QV45	70 kDa heat shock protein OS=Oryza sativa subsp. japonica GN=LOC_Os12g14070 PE=2 SV=1	74269	45.6	5.11	-0.0002	5799	27.69	TTPSVVAYTK
Q2QV45	70 kDa heat shock protein OS=Oryza sativa subsp. japonica GN=LOC_Os12g14070 PE=2 SV=1	74269	45.6	5.11	0.0001	5800	38.71	TTPSVVAYTK
Q2QV45	70 kDa heat shock protein OS=Oryza sativa subsp. japonica GN=LOC_Os12g14070 PE=2 SV=1	74269	45.6	5.11	0.0001	5801	28.54	TTPSVVAYTK
Q2QV45	70 kDa heat shock protein OS=Oryza sativa subsp. japonica GN=LOC_Os12g14070 PE=2 SV=1	74269	45.6	5.11	0.0003	5802	27.07	TTPSVVAYTK
Q2QV45	70 kDa heat shock protein OS=Oryza sativa subsp. japonica GN=LOC_Os12g14070 PE=2 SV=1	74269	45.6	5.11	0.0003	5803	60.85	TTPSVVAYTK
Q2QV45	70 kDa heat shock protein OS=Oryza sativa subsp. japonica GN=LOC_Os12g14070 PE=2 SV=1	74269	45.6	5.11	0.0004	5804	50.37	TTPSVVAYTK
Q2QV45	70 kDa heat shock protein OS=Oryza sativa subsp. japonica GN=LOC_Os12g14070 PE=2 SV=1	74269	45.6	5.11	0.0004	5805	34.8	TTPSVVAYTK
Q2QV45	70 kDa heat shock protein OS=Oryza sativa subsp. japonica GN=LOC_Os12g14070 PE=2 SV=1	74269	45.6	5.11	0.0005	5806	64.44	TTPSVVAYTK
Q2QV45	70 kDa heat shock protein OS=Oryza sativa subsp. japonica GN=LOC_Os12g14070 PE=2 SV=1	74269	45.6	5.11	0.0006	5807	32.73	TTPSVVAYTK
Q2QV45	70 kDa heat shock protein OS=Oryza sativa subsp. japonica GN=LOC_Os12g14070 PE=2 SV=1	74269	45.6	5.11	0.0006	5808	45.39	TTPSVVAYTK
Q2QV45	70 kDa heat shock protein OS=Oryza sativa subsp. japonica GN=LOC_Os12g14070 PE=2 SV=1	74269	45.6	5.11	0.0008	5809	47.94	TTPSVVAYTK
Q2QV45	70 kDa heat shock protein OS=Oryza sativa subsp. japonica GN=LOC_Os12g14070 PE=2 SV=1	74269	45.6	5.11	0.0012	5810	30.4	TTPSVVAYTK
Q2QV45	70 kDa heat shock protein OS=Oryza sativa subsp. japonica GN=LOC_Os12g14070 PE=2 SV=1	74269	45.6	5.11	0.0021	5811	39.45	TTPSVVAYTK
Q2QV45	70 kDa heat shock protein OS=Oryza sativa subsp. japonica GN=LOC_Os12g14070 PE=2 SV=1	74269	45.6	5.11	0.0002	6646	39.44	LKTPVTNALR
Q2QV45	70 kDa heat shock protein OS=Oryza sativa subsp. japonica GN=LOC_Os12g14070 PE=2 SV=1	74269	45.6	5.11	0.0009	6647	26.87	LKTPVTNALR
Q2QV45	70 kDa heat shock protein OS=Oryza sativa subsp. japonica GN=LOC_Os12g14070 PE=2 SV=1	74269	45.6	5.11	-0.0007	7184	23.96	KMAEVDDEAK
Q2QV45	70 kDa heat shock protein OS=Oryza sativa subsp. japonica GN=LOC_Os12g14070 PE=2 SV=1	74269	45.6	5.11	0.0001	7185	77.13	KMAEVDDEAK
Q2QV45	70 kDa heat shock protein OS=Oryza sativa subsp. japonica GN=LOC_Os12g14070 PE=2 SV=1	74269	45.6	5.11	-0.0021	7438	45.34	DEGIDLLKDK
Q2QV45	70 kDa heat shock protein OS=Oryza sativa subsp. japonica GN=LOC_Os12g14070 PE=2 SV=1	74269	45.6	5.11	-0.0011	7564	27.36	ELGDKVPAPVK
Q2QV45	70 kDa heat shock protein OS=Oryza sativa subsp. japonica GN=LOC_Os12g14070 PE=2 SV=1	74269	45.6	5.11	-0.0028	11592	59.4	NQADSVVYQTEK
Q2QV45	70 kDa heat shock protein OS=Oryza sativa subsp. japonica GN=LOC_Os12g14070 PE=2 SV=1	74269	45.6	5.11	-0.002	11593	52.91	NQADSVVYQTEK
Q2QV45	70 kDa heat shock protein OS=Oryza sativa subsp. japonica GN=LOC_Os12g14070 PE=2 SV=1	74269	45.6	5.11	-0.001	11594	53.53	NQADSVVYQTEK
Q2QV45	70 kDa heat shock protein OS=Oryza sativa subsp. japonica GN=LOC_Os12g14070 PE=2 SV=1	74269	45.6	5.11	-0.0009	11595	79.2	NQADSVVYQTEK
Q2QV45	70 kDa heat shock protein OS=Oryza sativa subsp. japonica GN=LOC_Os12g14070 PE=2 SV=1	74269	45.6	5.11	-0.0008	11596	79.4	NQADSVVYQTEK
Q2QV45	70 kDa heat shock protein OS=Oryza sativa subsp. japonica GN=LOC_Os12g14070 PE=2 SV=1	74269	45.6	5.11	-0.0006	11597	70.92	NQADSVVYQTEK
Q2QV45	70 kDa heat shock protein OS=Oryza sativa subsp. japonica GN=LOC_Os12g14070 PE=2 SV=1	74269	45.6	5.11	-0.0006	11598	73.28	NQADSVVYQTEK
Q2QV45	70 kDa heat shock protein OS=Oryza sativa subsp. japonica GN=LOC_Os12g14070 PE=2 SV=1	74269	45.6	5.11	-0.0005	11599	79.06	NQADSVVYQTEK
Q2QV45	70 kDa heat shock protein OS=Oryza sativa subsp. japonica GN=LOC_Os12g14070 PE=2 SV=1	74269	45.6	5.11	-0.0005	11600	58.91	NQADSVVYQTEK
Q2QV45	70 kDa heat shock protein OS=Oryza sativa subsp. japonica GN=LOC_Os12g14070 PE=2 SV=1	74269	45.6	5.11	-0.0003	11601	78.97	NQADSVVYQTEK
Q2QV45	70 kDa heat shock protein OS=Oryza sativa subsp. japonica GN=LOC_Os12g14070 PE=2 SV=1	74269	45.6	5.11	-0.0003	11602	69.16	NQADSVVYQTEK
Q2QV45	70 kDa heat shock protein OS=Oryza sativa subsp. japonica GN=LOC_Os12g14070 PE=2 SV=1	74269	45.6	5.11	-0.0002	11603	79.12	NQADSVVYQTEK
Q2QV45	70 kDa heat shock protein OS=Oryza sativa subsp. japonica GN=LOC_Os12g14070 PE=2 SV=1	74269	45.6	5.11	-0.0002	11604	79.16	NQADSVVYQTEK
Q2QV45	70 kDa heat shock protein OS=Oryza sativa subsp. japonica GN=LOC_Os12g14070 PE=2 SV=1	74269	45.6	5.11	-0.0002	11605	61.03	NQADSVVYQTEK
Q2QV45	70 kDa heat shock protein OS=Oryza sativa subsp. japonica GN=LOC_Os12g14070 PE=2 SV=1	74269	45.6	5.11	-0.0002	11606	73.43	NQADSVVYQTEK
Q2QV45	70 kDa heat shock protein OS=Oryza sativa subsp. japonica GN=LOC_Os12g14070 PE=2 SV=1	74269	45.6	5.11	0	11607	73.78	NQADSVVYQTEK
Q2QV45	70 kDa heat shock protein OS=Oryza sativa subsp. japonica GN=LOC_Os12g14070 PE=2 SV=1	74269	45.6	5.11	0.0001	11608	74.44	NQADSVVYQTEK
Q2QV45	70 kDa heat shock protein OS=Oryza sativa subsp. japonica GN=LOC_Os12g14070 PE=2 SV=1	74269	45.6	5.11	0.0001	11609	78.86	NQADSVVYQTEK
Q2QV45	70 kDa heat shock protein OS=Oryza sativa subsp. japonica GN=LOC_Os12g14070 PE=2 SV=1	74269	45.6	5.11	0.0001	11610	73.58	NQADSVVYQTEK
Q2QV45	70 kDa heat shock protein OS=Oryza sativa subsp. japonica GN=LOC_Os12g14070 PE=2 SV=1	74269	45.6	5.11	0.0001	11611	73.54	NQADSVVYQTEK
Q2QV45	70 kDa heat shock protein OS=Oryza sativa subsp. japonica GN=LOC_Os12g14070 PE=2 SV=1	74269	45.6	5.11	0.0002	11612	79.17	NQADSVVYQTEK
Q2QV45	70 kDa heat shock protein OS=Oryza sativa subsp. japonica GN=LOC_Os12g14070 PE=2 SV=1	74269	45.6	5.11	0.0008	11613	58.87	NQADSVVYQTEK
Q2QV45	70 kDa heat shock protein OS=Oryza sativa subsp. japonica GN=LOC_Os12g14070 PE=2 SV=1	74269	45.6	5.11	0.002	11614	53.41	NQADSVVYQTEK
Q2QV45	70 kDa heat shock protein OS=Oryza sativa subsp. japonica GN=LOC_Os12g14070 PE=2 SV=1	74269	45.6	5.11	0.0001	11852	45.27	FEELCSDLIDR
Q2QV45	70 kDa heat shock protein OS=Oryza sativa subsp. japonica GN=LOC_Os12g14070 PE=2 SV=1	74269	45.6	5.11	0.0049	12546	81.85	QFAAEEISAQVLR
Q2QV45	70 kDa heat shock protein OS=Oryza sativa subsp. japonica GN=LOC_Os12g14070 PE=2 SV=1	74269	45.6	5.11	-0.0011	13136	56.52	MVEEADKFAQEDK
Q2QV45	70 kDa heat shock protein OS=Oryza sativa subsp. japonica GN=LOC_Os12g14070 PE=2 SV=1	74269	45.6	5.11	0.0013	13138	33.1	MVEEADKFAQEDK
Q2QV45	70 kDa heat shock protein OS=Oryza sativa subsp. japonica GN=LOC_Os12g14070 PE=2 SV=1	74269	45.6	5.11	-0.0034	13266	32.6	MVEEADKFAQEDK
Q2QV45	70 kDa heat shock protein OS=Oryza sativa subsp. japonica GN=LOC_Os12g14070 PE=2 SV=1	74269	45.6	5.11	-0.0003	13377	52.21	AVVTVPAYFNDSQR
Q2QV45	70 kDa heat shock protein OS=Oryza sativa subsp. japonica GN=LOC_Os12g14070 PE=2 SV=1	74269	45.6	5.11	0.0017	13548	51.54	QAVVNPENTFFSVK
Q2QV45	70 kDa heat shock protein OS=Oryza sativa subsp. japonica GN=LOC_Os12g14070 PE=2 SV=1	74269	45.6	5.11	-0.0025	14104	25.99	GPNDGDVIDADFTDSN
Q2QV45	70 kDa heat shock protein OS=Oryza sativa subsp. japonica GN=LOC_Os12g14070 PE=2 SV=1	74269	45.6	5.11	-0.0015	14105	28.1	GPNDGDVIDADFTDSN
Q2QV45	70 kDa heat shock protein OS=Oryza sativa subsp. japonica GN=LOC_Os12g14070 PE=2 SV=1	74269	45.6	5.11	-0.0002	14106	38.81	GPNDGDVIDADFTDSN
Q2QV45	70 kDa heat shock protein OS=Oryza sativa subsp. japonica GN=LOC_Os12g14070 PE=2 SV=1	74269	45.6	5.11	0.0002	14107	36.88	GPNDGDVIDADFTDSN
Q2QV45	70 kDa heat shock protein OS=Oryza sativa subsp. japonica GN=LOC_Os12g14070 PE=2 SV=1	74269	45.6	5.11	0.0008	14108	27.5	GPNDGDVIDADFTDSN
Q2QV45	70 kDa heat shock protein OS=Oryza sativa subsp. japonica GN=LOC_Os12g14070 PE=2 SV=1	74269	45.6	5.11	0.001	14474	82.54	IINEPTAASLAYGFEK
Q2QV45	70 kDa heat shock protein OS=Oryza sativa subsp. japonica GN=LOC_Os12g14070 PE=2 SV=1	74269	45.6	5.11	-0.0014	15847	57.19	KQDITITGASTLPKDEVER
Q2QV45	70 kDa heat shock protein OS=Oryza sativa subsp. japonica GN=LOC_Os12g14070 PE=2 SV=1	74269	45.6	5.11	-0.0003	15848	61.56	KQDITITGASTLPKDEVER
Q2QV45	70 kDa heat shock protein OS=Oryza sativa subsp. japonica GN=LOC_Os12g14070 PE=2 SV=1	74269	45.6	5.11	-0.008	16460	100.83	DPNVTVNPDEVVSLGAAVQGGVLAGDVK
Q2QV45	70 kDa heat shock protein OS=Oryza sativa subsp. japonica GN=LOC_Os12g14070 PE=2 SV=1	74269	45.6	5.11	0.0022	16461	120.06	DPNVTVNPDEVVSLGAAVQGGVLAGDVK
Q2QV45	70 kDa heat shock protein OS=Oryza sativa subsp. japonica GN=LOC_Os12g14070 PE=2 SV=1	74269	45.6	5.11	-0.0008	16601	105.62	VVGIDLGTTNSAVAAMEGGKPTVITNAEGQR
Q75GX9	Cupin family protein, expressed OS=Oryza sativa subsp. japonica GN=OSJNBa0034D21.12 PE=4 SV=1	63845	39	8.35	-0.0005	73	39.61	KLIVTK
Q75GX9	Cupin family protein, expressed OS=Oryza sativa subsp. japonica GN=OSJNBa0034D21.12 PE=4 SV=1	63845	39	8.35	-0.0001	1033	38.15	WSYAIR
Q75GX9	Cupin family protein, expressed OS=Oryza sativa subsp. japonica GN=OSJNBa0034D21.12 PE=4 SV=1	63845	39	8.35	0	1034	35.34	WSYAIR
Q75GX9	Cupin family protein, expressed OS=Oryza sativa subsp. japonica GN=OSJNBa0034D21.12 PE=4 SV=1	63845	39	8.35	-0.0001	1083	34.52	KLDPQAK
Q75GX9	Cupin family protein, expressed OS=Oryza sativa subsp. japonica GN=OSJNBa0034D21.12 PE=4 SV=1	63845	39	8.35	0.0002	1084	33.87	KLDPQAK
Q75GX9	Cupin family protein, expressed OS=Oryza sativa subsp. japonica GN=OSJNBa0034D21.12 PE=4 SV=1	63845	39	8.35	0.0009	1085	23.46	KLDPQAK
Q75GX9	Cupin family protein, expressed OS=Oryza sativa subsp. japonica GN=OSJNBa0034D21.12 PE=4 SV=1	63845	39	8.35	-0.0005	1480	30.49	ASEEQVR
Q75GX9	Cupin family protein, expressed OS=Oryza sativa subsp. japonica GN=OSJNBa0034D21.12 PE=4 SV=1	63845	39	8.35	-0.0002	1481	42.43	ASEEQVR
Q75GX9	Cupin family protein, expressed OS=Oryza sativa subsp. japonica GN=OSJNBa0034D21.12 PE=4 SV=1	63845	39	8.35	0.0003	1482	44.6	ASEEQVR
Q75GX9	Cupin family protein, expressed OS=Oryza sativa subsp. japonica GN=OSJNBa0034D21.12 PE=4 SV=1	63845	39	8.35	0.0003	1483	35.12	ASEEQVR
Q75GX9	Cupin family protein, expressed OS=Oryza sativa subsp. japonica GN=OSJNBa0034D21.12 PE=4 SV=1	63845	39	8.35	-0.0007	1867	32.77	LYEADAR
Q75GX9	Cupin family protein, expressed OS=Oryza sativa subsp. japonica GN=OSJNBa0034D21.12 PE=4 SV=1	63845	39	8.35	-0.0007	1868	37.66	LYEADAR
Q75GX9	Cupin family protein, expressed OS=Oryza sativa subsp. japonica GN=OSJNBa0034D21.12 PE=4 SV=1	63845	39	8.35	-0.0005	1869	40.87	LYEADAR
Q75GX9	Cupin family protein, expressed OS=Oryza sativa subsp. japonica GN=OSJNBa0034D21.12 PE=4 SV=1	63845	39	8.35	-0.0003	1870	45.71	LYEADAR
Q75GX9	Cupin family protein, expressed OS=Oryza sativa subsp. japonica GN=OSJNBa0034D21.12 PE=4 SV=1	63845	39	8.35	-0.0002	1871	36.34	LYEADAR
Q75GX9	Cupin family protein, expressed OS=Oryza sativa subsp. japonica GN=OSJNBa0034D21.12 PE=4 SV=1	63845	39	8.35	-0.0002	1872	35.87	LYEADAR
Q75GX9	Cupin family protein, expressed OS=Oryza sativa subsp. japonica GN=OSJNBa0034D21.12 PE=4 SV=1	63845	39	8.35	0.0004	1874	37.36	LYEADAR
Q75GX9	Cupin family protein, expressed OS=Oryza sativa subsp. japonica GN=OSJNBa0034D21.12 PE=4 SV=1	63845	39	8.35	0.0006	1875	41.53	LYEADAR
Q75GX9	Cupin family protein, expressed OS=Oryza sativa subsp. japonica GN=OSJNBa0034D21.12 PE=4 SV=1	63845	39	8.35	0.0018	1876	25.27	LYEADAR
Q75GX9	Cupin family protein, expressed OS=Oryza sativa subsp. japonica GN=OSJNBa0034D21.12 PE=4 SV=1	63845	39	8.35	-0.0001	3287	28.92	ELAFAASAR
Q75GX9	Cupin family protein, expressed OS=Oryza sativa subsp. japonica GN=OSJNBa0034D21.12 PE=4 SV=1	63845	39	8.35	-0.0002	3898	45.47	VAVLEANPR
Q75GX9	Cupin family protein, expressed OS=Oryza sativa subsp. japonica GN=OSJNBa0034D21.12 PE=4 SV=1	63845	39	8.35	-0.0001	3899	47.46	VAVLEANPR
Q75GX9	Cupin family protein, expressed OS=Oryza sativa subsp. japonica GN=OSJNBa0034D21.12 PE=4 SV=1	63845	39	8.35	-0.0001	3900	52.65	VAVLEANPR
Q75GX9	Cupin family protein, expressed OS=Oryza sativa subsp. japonica GN=OSJNBa0034D21.12 PE=4 SV=1	63845	39	8.35	0	3901	56.46	VAVLEANPR
Q75GX9	Cupin family protein, expressed OS=Oryza sativa subsp. japonica GN=OSJNBa0034D21.12 PE=4 SV=1	63845	39	8.35	0	3902	35.87	VAVLEANPR
Q75GX9	Cupin family protein, expressed OS=Oryza sativa subsp. japonica GN=OSJNBa0034D21.12 PE=4 SV=1	63845	39	8.35	0	3903	34.45	VAVLEANPR
Q75GX9	Cupin family protein, expressed OS=Oryza sativa subsp. japonica GN=OSJNBa0034D21.12 PE=4 SV=1	63845	39	8.35	0	3904	45.53	VAVLEANPR
Q75GX9	Cupin family protein, expressed OS=Oryza sativa subsp. japonica GN=OSJNBa0034D21.12 PE=4 SV=1	63845	39	8.35	0.0001	3905	58.37	VAVLEANPR
Q75GX9	Cupin family protein, expressed OS=Oryza sativa subsp. japonica GN=OSJNBa0034D21.12 PE=4 SV=1	63845	39	8.35	0.0001	3906	58.21	VAVLEANPR
Q75GX9	Cupin family protein, expressed OS=Oryza sativa subsp. japonica GN=OSJNBa0034D21.12 PE=4 SV=1	63845	39	8.35	0.0001	3907	42.4	VAVLEANPR
Q75GX9	Cupin family protein, expressed OS=Oryza sativa subsp. japonica GN=OSJNBa0034D21.12 PE=4 SV=1	63845	39	8.35	0.0001	3908	31.61	VAVLEANPR
Q75GX9	Cupin family protein, expressed OS=Oryza sativa subsp. japonica GN=OSJNBa0034D21.12 PE=4 SV=1	63845	39	8.35	0.0001	3909	36.2	VAVLEANPR
Q75GX9	Cupin family protein, expressed OS=Oryza sativa subsp. japonica GN=OSJNBa0034D21.12 PE=4 SV=1	63845	39	8.35	0.0001	3910	49.49	VAVLEANPR
Q75GX9	Cupin family protein, expressed OS=Oryza sativa subsp. japonica GN=OSJNBa0034D21.12 PE=4 SV=1	63845	39	8.35	0.0001	3911	53.23	VAVLEANPR
Q75GX9	Cupin family protein, expressed OS=Oryza sativa subsp. japonica GN=OSJNBa0034D21.12 PE=4 SV=1	63845	39	8.35	0.0001	3912	53.26	VAVLEANPR
Q75GX9	Cupin family protein, expressed OS=Oryza sativa subsp. japonica GN=OSJNBa0034D21.12 PE=4 SV=1	63845	39	8.35	0.0001	3913	35.13	VAVLEANPR
Q75GX9	Cupin family protein, expressed OS=Oryza sativa subsp. japonica GN=OSJNBa0034D21.12 PE=4 SV=1	63845	39	8.35	0.0001	3914	55.72	VAVLEANPR
Q75GX9	Cupin family protein, expressed OS=Oryza sativa subsp. japonica GN=OSJNBa0034D21.12 PE=4 SV=1	63845	39	8.35	0.0001	3915	54.53	VAVLEANPR
Q75GX9	Cupin family protein, expressed OS=Oryza sativa subsp. japonica GN=OSJNBa0034D21.12 PE=4 SV=1	63845	39	8.35	0.0001	3916	54.7	VAVLEANPR
Q75GX9	Cupin family protein, expressed OS=Oryza sativa subsp. japonica GN=OSJNBa0034D21.12 PE=4 SV=1	63845	39	8.35	0.0001	3917	47.52	VAVLEANPR
Q75GX9	Cupin family protein, expressed OS=Oryza sativa subsp. japonica GN=OSJNBa0034D21.12 PE=4 SV=1	63845	39	8.35	0.0001	3918	58.42	VAVLEANPR
Q75GX9	Cupin family protein, expressed OS=Oryza sativa subsp. japonica GN=OSJNBa0034D21.12 PE=4 SV=1	63845	39	8.35	0.0001	3919	70.46	VAVLEANPR
Q75GX9	Cupin family protein, expressed OS=Oryza sativa subsp. japonica GN=OSJNBa0034D21.12 PE=4 SV=1	63845	39	8.35	0.0002	3920	52.87	VAVLEANPR
Q75GX9	Cupin family protein, expressed OS=Oryza sativa subsp. japonica GN=OSJNBa0034D21.12 PE=4 SV=1	63845	39	8.35	0.0002	3921	53.01	VAVLEANPR
Q75GX9	Cupin family protein, expressed OS=Oryza sativa subsp. japonica GN=OSJNBa0034D21.12 PE=4 SV=1	63845	39	8.35	0.0002	3922	39.88	VAVLEANPR
Q75GX9	Cupin family protein, expressed OS=Oryza sativa subsp. japonica GN=OSJNBa0034D21.12 PE=4 SV=1	63845	39	8.35	0.0002	3923	52.64	VAVLEANPR
Q75GX9	Cupin family protein, expressed OS=Oryza sativa subsp. japonica GN=OSJNBa0034D21.12 PE=4 SV=1	63845	39	8.35	0.0002	3924	51.76	VAVLEANPR
Q75GX9	Cupin family protein, expressed OS=Oryza sativa subsp. japonica GN=OSJNBa0034D21.12 PE=4 SV=1	63845	39	8.35	0.0003	3925	53.67	VAVLEANPR
Q75GX9	Cupin family protein, expressed OS=Oryza sativa subsp. japonica GN=OSJNBa0034D21.12 PE=4 SV=1	63845	39	8.35	0.0003	3926	47.37	VAVLEANPR
Q75GX9	Cupin family protein, expressed OS=Oryza sativa subsp. japonica GN=OSJNBa0034D21.12 PE=4 SV=1	63845	39	8.35	0.0003	3927	42.79	VAVLEANPR
Q75GX9	Cupin family protein, expressed OS=Oryza sativa subsp. japonica GN=OSJNBa0034D21.12 PE=4 SV=1	63845	39	8.35	0.0003	3928	58.75	VAVLEANPR
Q75GX9	Cupin family protein, expressed OS=Oryza sativa subsp. japonica GN=OSJNBa0034D21.12 PE=4 SV=1	63845	39	8.35	0.0003	3929	51.58	VAVLEANPR
Q75GX9	Cupin family protein, expressed OS=Oryza sativa subsp. japonica GN=OSJNBa0034D21.12 PE=4 SV=1	63845	39	8.35	0.0004	3930	55.64	VAVLEANPR
Q75GX9	Cupin family protein, expressed OS=Oryza sativa subsp. japonica GN=OSJNBa0034D21.12 PE=4 SV=1	63845	39	8.35	0.0004	3931	53.38	VAVLEANPR
Q75GX9	Cupin family protein, expressed OS=Oryza sativa subsp. japonica GN=OSJNBa0034D21.12 PE=4 SV=1	63845	39	8.35	0.0004	3932	34.27	VAVLEANPR
Q75GX9	Cupin family protein, expressed OS=Oryza sativa subsp. japonica GN=OSJNBa0034D21.12 PE=4 SV=1	63845	39	8.35	0.0004	3933	42.46	VAVLEANPR
Q75GX9	Cupin family protein, expressed OS=Oryza sativa subsp. japonica GN=OSJNBa0034D21.12 PE=4 SV=1	63845	39	8.35	0.0004	3934	56.56	VAVLEANPR
Q75GX9	Cupin family protein, expressed OS=Oryza sativa subsp. japonica GN=OSJNBa0034D21.12 PE=4 SV=1	63845	39	8.35	0.0004	3935	55.15	VAVLEANPR
Q75GX9	Cupin family protein, expressed OS=Oryza sativa subsp. japonica GN=OSJNBa0034D21.12 PE=4 SV=1	63845	39	8.35	0.0004	3936	37.92	VAVLEANPR
Q75GX9	Cupin family protein, expressed OS=Oryza sativa subsp. japonica GN=OSJNBa0034D21.12 PE=4 SV=1	63845	39	8.35	0.0005	3937	30.8	VAVLEANPR
Q75GX9	Cupin family protein, expressed OS=Oryza sativa subsp. japonica GN=OSJNBa0034D21.12 PE=4 SV=1	63845	39	8.35	0.0006	3938	52.56	VAVLEANPR
Q75GX9	Cupin family protein, expressed OS=Oryza sativa subsp. japonica GN=OSJNBa0034D21.12 PE=4 SV=1	63845	39	8.35	0.0007	3939	52.12	VAVLEANPR
Q75GX9	Cupin family protein, expressed OS=Oryza sativa subsp. japonica GN=OSJNBa0034D21.12 PE=4 SV=1	63845	39	8.35	0.0007	3940	21.01	VAVLEANPR
Q75GX9	Cupin family protein, expressed OS=Oryza sativa subsp. japonica GN=OSJNBa0034D21.12 PE=4 SV=1	63845	39	8.35	0.0007	3941	62.15	VAVLEANPR
Q75GX9	Cupin family protein, expressed OS=Oryza sativa subsp. japonica GN=OSJNBa0034D21.12 PE=4 SV=1	63845	39	8.35	0.001	3942	51.66	VAVLEANPR
Q75GX9	Cupin family protein, expressed OS=Oryza sativa subsp. japonica GN=OSJNBa0034D21.12 PE=4 SV=1	63845	39	8.35	0.001	3943	44.05	VAVLEANPR
Q75GX9	Cupin family protein, expressed OS=Oryza sativa subsp. japonica GN=OSJNBa0034D21.12 PE=4 SV=1	63845	39	8.35	0.0012	3944	40.84	VAVLEANPR
Q75GX9	Cupin family protein, expressed OS=Oryza sativa subsp. japonica GN=OSJNBa0034D21.12 PE=4 SV=1	63845	39	8.35	0.0017	3945	47.47	VAVLEANPR
Q75GX9	Cupin family protein, expressed OS=Oryza sativa subsp. japonica GN=OSJNBa0034D21.12 PE=4 SV=1	63845	39	8.35	0.0032	3946	29.16	VAVLEANPR
Q75GX9	Cupin family protein, expressed OS=Oryza sativa subsp. japonica GN=OSJNBa0034D21.12 PE=4 SV=1	63845	39	8.35	0	4074	30.72	ISEEKLEK
Q75GX9	Cupin family protein, expressed OS=Oryza sativa subsp. japonica GN=OSJNBa0034D21.12 PE=4 SV=1	63845	39	8.35	0	4075	43.02	ISEEKLEK
Q75GX9	Cupin family protein, expressed OS=Oryza sativa subsp. japonica GN=OSJNBa0034D21.12 PE=4 SV=1	63845	39	8.35	-0.0017	8727	21.35	RGEESEDEDR
Q75GX9	Cupin family protein, expressed OS=Oryza sativa subsp. japonica GN=OSJNBa0034D21.12 PE=4 SV=1	63845	39	8.35	-0.008	9098	24.7	NPESFLSSFSK
Q75GX9	Cupin family protein, expressed OS=Oryza sativa subsp. japonica GN=OSJNBa0034D21.12 PE=4 SV=1	63845	39	8.35	-0.0019	9099	26.27	NPESFLSSFSK
Q75GX9	Cupin family protein, expressed OS=Oryza sativa subsp. japonica GN=OSJNBa0034D21.12 PE=4 SV=1	63845	39	8.35	-0.0018	9100	42.22	NPESFLSSFSK
Q75GX9	Cupin family protein, expressed OS=Oryza sativa subsp. japonica GN=OSJNBa0034D21.12 PE=4 SV=1	63845	39	8.35	0.0007	9102	40.28	NPESFLSSFSK
Q75GX9	Cupin family protein, expressed OS=Oryza sativa subsp. japonica GN=OSJNBa0034D21.12 PE=4 SV=1	63845	39	8.35	0.0008	9103	40.93	NPESFLSSFSK
Q75GX9	Cupin family protein, expressed OS=Oryza sativa subsp. japonica GN=OSJNBa0034D21.12 PE=4 SV=1	63845	39	8.35	0.0002	9105	43.34	MYLAGMNSVLK
Q75GX9	Cupin family protein, expressed OS=Oryza sativa subsp. japonica GN=OSJNBa0034D21.12 PE=4 SV=1	63845	39	8.35	-0.0001	9389	46.07	MYLAGMNSVLK
Q75GX9	Cupin family protein, expressed OS=Oryza sativa subsp. japonica GN=OSJNBa0034D21.12 PE=4 SV=1	63845	39	8.35	0.0004	9390	62.64	MYLAGMNSVLK
Q75GX9	Cupin family protein, expressed OS=Oryza sativa subsp. japonica GN=OSJNBa0034D21.12 PE=4 SV=1	63845	39	8.35	0.0004	9391	44.35	MYLAGMNSVLK
Q75GX9	Cupin family protein, expressed OS=Oryza sativa subsp. japonica GN=OSJNBa0034D21.12 PE=4 SV=1	63845	39	8.35	0.0009	9392	34.26	MYLAGMNSVLK
Q75GX9	Cupin family protein, expressed OS=Oryza sativa subsp. japonica GN=OSJNBa0034D21.12 PE=4 SV=1	63845	39	8.35	0.0018	9393	46.61	MYLAGMNSVLK
Q75GX9	Cupin family protein, expressed OS=Oryza sativa subsp. japonica GN=OSJNBa0034D21.12 PE=4 SV=1	63845	39	8.35	0.0004	9764	81.59	GEGSSEEEDEGR
Q75GX9	Cupin family protein, expressed OS=Oryza sativa subsp. japonica GN=OSJNBa0034D21.12 PE=4 SV=1	63845	39	8.35	-0.0018	11082	40.5	CEQDRPPYER
Q75GX9	Cupin family protein, expressed OS=Oryza sativa subsp. japonica GN=OSJNBa0034D21.12 PE=4 SV=1	63845	39	8.35	-0.0005	11083	23.99	CEQDRPPYER
Q75GX9	Cupin family protein, expressed OS=Oryza sativa subsp. japonica GN=OSJNBa0034D21.12 PE=4 SV=1	63845	39	8.35	-0.0003	11084	31.3	CEQDRPPYER
Q75GX9	Cupin family protein, expressed OS=Oryza sativa subsp. japonica GN=OSJNBa0034D21.12 PE=4 SV=1	63845	39	8.35	0	11086	21.43	CEQDRPPYER
Q75GX9	Cupin family protein, expressed OS=Oryza sativa subsp. japonica GN=OSJNBa0034D21.12 PE=4 SV=1	63845	39	8.35	-0.0026	12318	52.5	EEEEEEEEQQK
Q75GX9	Cupin family protein, expressed OS=Oryza sativa subsp. japonica GN=OSJNBa0034D21.12 PE=4 SV=1	63845	39	8.35	-0.0004	12323	62.8	RGEGSSEEEDEGR
Q75GX9	Cupin family protein, expressed OS=Oryza sativa subsp. japonica GN=OSJNBa0034D21.12 PE=4 SV=1	63845	39	8.35	-0.0001	12324	60.02	RGEGSSEEEDEGR
Q75GX9	Cupin family protein, expressed OS=Oryza sativa subsp. japonica GN=OSJNBa0034D21.12 PE=4 SV=1	63845	39	8.35	-0.0011	13359	55.18	GEGSSEEEDEGRER
Q75GX9	Cupin family protein, expressed OS=Oryza sativa subsp. japonica GN=OSJNBa0034D21.12 PE=4 SV=1	63845	39	8.35	0.0002	13361	43.04	GEGSSEEEDEGRER
Q75GX9	Cupin family protein, expressed OS=Oryza sativa subsp. japonica GN=OSJNBa0034D21.12 PE=4 SV=1	63845	39	8.35	0.0005	13362	47.55	GEGSSEEEDEGRER
Q75GX9	Cupin family protein, expressed OS=Oryza sativa subsp. japonica GN=OSJNBa0034D21.12 PE=4 SV=1	63845	39	8.35	0.0006	14463	42.71	RGEGSSEEEDEGRER
Q75GX9	Cupin family protein, expressed OS=Oryza sativa subsp. japonica GN=OSJNBa0034D21.12 PE=4 SV=1	63845	39	8.35	-0.0027	15196	73.85	GTVFVVPSGHPIVVTSSR
Q75GX9	Cupin family protein, expressed OS=Oryza sativa subsp. japonica GN=OSJNBa0034D21.12 PE=4 SV=1	63845	39	8.35	-0.0032	15560	84.27	CVQECKDQQQQQQER
Q75GX9	Cupin family protein, expressed OS=Oryza sativa subsp. japonica GN=OSJNBa0034D21.12 PE=4 SV=1	63845	39	8.35	-0.0027	15561	119.27	CVQECKDQQQQQQER
Q75GX9	Cupin family protein, expressed OS=Oryza sativa subsp. japonica GN=OSJNBa0034D21.12 PE=4 SV=1	63845	39	8.35	-0.002	15562	60.18	CVQECKDQQQQQQER
Q75GX9	Cupin family protein, expressed OS=Oryza sativa subsp. japonica GN=OSJNBa0034D21.12 PE=4 SV=1	63845	39	8.35	-0.0006	15563	34.33	CVQECKDQQQQQQER
Q75GX9	Cupin family protein, expressed OS=Oryza sativa subsp. japonica GN=OSJNBa0034D21.12 PE=4 SV=1	63845	39	8.35	0.0023	15564	26.26	CVQECKDQQQQQQER
Q75GX9	Cupin family protein, expressed OS=Oryza sativa subsp. japonica GN=OSJNBa0034D21.12 PE=4 SV=1	63845	39	8.35	-0.0012	15866	132	GQEEEEEEQVGQGYETIR
Q75GX9	Cupin family protein, expressed OS=Oryza sativa subsp. japonica GN=OSJNBa0034D21.12 PE=4 SV=1	63845	39	8.35	-0.0007	15867	112.72	GQEEEEEEQVGQGYETIR
Q75GX9	Cupin family protein, expressed OS=Oryza sativa subsp. japonica GN=OSJNBa0034D21.12 PE=4 SV=1	63845	39	8.35	0.0008	15868	118.16	GQEEEEEEQVGQGYETIR
Q75GX9	Cupin family protein, expressed OS=Oryza sativa subsp. japonica GN=OSJNBa0034D21.12 PE=4 SV=1	63845	39	8.35	0.001	15869	112.92	GQEEEEEEQVGQGYETIR
Q75GX9	Cupin family protein, expressed OS=Oryza sativa subsp. japonica GN=OSJNBa0034D21.12 PE=4 SV=1	63845	39	8.35	0.002	15870	86.12	GQEEEEEEQVGQGYETIR
Q75GX9	Cupin family protein, expressed OS=Oryza sativa subsp. japonica GN=OSJNBa0034D21.12 PE=4 SV=1	63845	39	8.35	0.0032	15871	101.28	GQEEEEEEQVGQGYETIR
Q75GX9	Cupin family protein, expressed OS=Oryza sativa subsp. japonica GN=OSJNBa0034D21.12 PE=4 SV=1	63845	39	8.35	-0.0028	16015	77.61	QGDVFVAPAGTINYLANTDGR
Q75GX9	Cupin family protein, expressed OS=Oryza sativa subsp. japonica GN=OSJNBa0034D21.12 PE=4 SV=1	63845	39	8.35	-0.0014	16016	53.39	QGDVFVAPAGTINYLANTDGR
Q75GX9	Cupin family protein, expressed OS=Oryza sativa subsp. japonica GN=OSJNBa0034D21.12 PE=4 SV=1	63845	39	8.35	0.0011	16017	100.71	QGDVFVAPAGTINYLANTDGR
Q75GX9	Cupin family protein, expressed OS=Oryza sativa subsp. japonica GN=OSJNBa0034D21.12 PE=4 SV=1	63845	39	8.35	0.0011	16018	78.18	QGDVFVAPAGTINYLANTDGR
Q75GX9	Cupin family protein, expressed OS=Oryza sativa subsp. japonica GN=OSJNBa0034D21.12 PE=4 SV=1	63845	39	8.35	0.0028	16019	72.14	QGDVFVAPAGTINYLANTDGR
Q75GX9	Cupin family protein, expressed OS=Oryza sativa subsp. japonica GN=OSJNBa0034D21.12 PE=4 SV=1	63845	39	8.35	0.0055	16020	28.77	QGDVFVAPAGTINYLANTDGR
Q75GX9	Cupin family protein, expressed OS=Oryza sativa subsp. japonica GN=OSJNBa0034D21.12 PE=4 SV=1	63845	39	8.35	0.0062	16021	96.13	QGDVFVAPAGTINYLANTDGR
Q75GX9	Cupin family protein, expressed OS=Oryza sativa subsp. japonica GN=OSJNBa0034D21.12 PE=4 SV=1	63845	39	8.35	-0.0038	16040	84.47	EVDELLNAQQESAFLAGPEK
Q75GX9	Cupin family protein, expressed OS=Oryza sativa subsp. japonica GN=OSJNBa0034D21.12 PE=4 SV=1	63845	39	8.35	-0.0018	16041	43.9	EVDELLNAQQESAFLAGPEK
Q75GX9	Cupin family protein, expressed OS=Oryza sativa subsp. japonica GN=OSJNBa0034D21.12 PE=4 SV=1	63845	39	8.35	-0.0007	16042	51.86	EVDELLNAQQESAFLAGPEK
Q75GX9	Cupin family protein, expressed OS=Oryza sativa subsp. japonica GN=OSJNBa0034D21.12 PE=4 SV=1	63845	39	8.35	-0.0001	16043	30.01	EVDELLNAQQESAFLAGPEK
Q75GX9	Cupin family protein, expressed OS=Oryza sativa subsp. japonica GN=OSJNBa0034D21.12 PE=4 SV=1	63845	39	8.35	0.0002	16044	90.78	EVDELLNAQQESAFLAGPEK
Q75GX9	Cupin family protein, expressed OS=Oryza sativa subsp. japonica GN=OSJNBa0034D21.12 PE=4 SV=1	63845	39	8.35	0.0014	16045	93.01	EVDELLNAQQESAFLAGPEK
Q75GX9	Cupin family protein, expressed OS=Oryza sativa subsp. japonica GN=OSJNBa0034D21.12 PE=4 SV=1	63845	39	8.35	0.0016	16046	112.11	EVDELLNAQQESAFLAGPEK
Q75GX9	Cupin family protein, expressed OS=Oryza sativa subsp. japonica GN=OSJNBa0034D21.12 PE=4 SV=1	63845	39	8.35	0.0046	16047	91.44	EVDELLNAQQESAFLAGPEK
Q75GX9	Cupin family protein, expressed OS=Oryza sativa subsp. japonica GN=OSJNBa0034D21.12 PE=4 SV=1	63845	39	8.35	0.0077	16048	92.48	EVDELLNAQQESAFLAGPEK
Q75GX9	Cupin family protein, expressed OS=Oryza sativa subsp. japonica GN=OSJNBa0034D21.12 PE=4 SV=1	63845	39	8.35	-0.0017	16679	98.92	EEEEEEEEQQKGQEEEEEEQVGQGYETIR
Q75GX9	Cupin family protein, expressed OS=Oryza sativa subsp. japonica GN=OSJNBa0034D21.12 PE=4 SV=1	63845	39	8.35	0.0005	16680	62.7	EEEEEEEEQQKGQEEEEEEQVGQGYETIR
Q0JJ36	Glutelin OS=Oryza sativa subsp. japonica GN=Os01g0762500 PE=2 SV=1	56782	50.9	9.09	0.0002	10565	76.19	ALPNDVLANAYR
Q0JJ36	Glutelin OS=Oryza sativa subsp. japonica GN=Os01g0762500 PE=2 SV=1	56782	50.9	9.09	0.0003	10566	52.45	ALPNDVLANAYR
Q0JJ36	Glutelin OS=Oryza sativa subsp. japonica GN=Os01g0762500 PE=2 SV=1	56782	50.9	9.09	0.0025	10567	64.05	ALPNDVLANAYR
Q0JJ36	Glutelin OS=Oryza sativa subsp. japonica GN=Os01g0762500 PE=2 SV=1	56782	50.9	9.09	0.0012	12609	49.53	GDEFGAFTPIQYK
Q0JJ36	Glutelin OS=Oryza sativa subsp. japonica GN=Os01g0762500 PE=2 SV=1	56782	50.9	9.09	-0.0031	13546	26.89	GQLLIIPQHYAVVK
Q0JJ36	Glutelin OS=Oryza sativa subsp. japonica GN=Os01g0762500 PE=2 SV=1	56782	50.9	9.09	-0.0011	16284	132.1	VTNLNTQNFPILSLVQMSAVK
Q0JJ36	Glutelin OS=Oryza sativa subsp. japonica GN=Os01g0762500 PE=2 SV=1	56782	50.9	9.09	-0.0011	16285	50.36	VTNLNTQNFPILSLVQMSAVK
Q0JJ36	Glutelin OS=Oryza sativa subsp. japonica GN=Os01g0762500 PE=2 SV=1	56782	50.9	9.09	0.0051	16440	29.24	SQNIFSGFSTELLSEALGVSSQVAR
Q0JJ36	Glutelin OS=Oryza sativa subsp. japonica GN=Os01g0762500 PE=2 SV=1	56782	50.9	9.09	0	16494	35.07	SQAGTTEFFDVSNEQFQCTGVSVVR
Q0JJ36	Glutelin OS=Oryza sativa subsp. japonica GN=Os01g0762500 PE=2 SV=1	56782	50.9	9.09	0.0004	16495	129.25	SQAGTTEFFDVSNEQFQCTGVSVVR
Q0JJ36	Glutelin OS=Oryza sativa subsp. japonica GN=Os01g0762500 PE=2 SV=1	56782	50.9	9.09	0.0018	16496	95.25	SQAGTTEFFDVSNEQFQCTGVSVVR
Q0JJ36	Glutelin OS=Oryza sativa subsp. japonica GN=Os01g0762500 PE=2 SV=1	56782	50.9	9.09	0.0026	16497	122.38	SQAGTTEFFDVSNEQFQCTGVSVVR
Q0JJ36	Glutelin OS=Oryza sativa subsp. japonica GN=Os01g0762500 PE=2 SV=1	56782	50.9	9.09	-0.0032	16512	95.97	VEHGLSLLQPYASLQEQEQGQVQSR
Q0JJ36	Glutelin OS=Oryza sativa subsp. japonica GN=Os01g0762500 PE=2 SV=1	56782	50.9	9.09	-0.0013	16513	72.78	VEHGLSLLQPYASLQEQEQGQVQSR
Q0JJ36	Glutelin OS=Oryza sativa subsp. japonica GN=Os01g0762500 PE=2 SV=1	56782	50.9	9.09	0.0003	16514	57.6	VEHGLSLLQPYASLQEQEQGQVQSR
Q0JJ36	Glutelin OS=Oryza sativa subsp. japonica GN=Os01g0762500 PE=2 SV=1	56782	50.9	9.09	0.0009	16515	55.44	VEHGLSLLQPYASLQEQEQGQVQSR
Q0JJ36	Glutelin OS=Oryza sativa subsp. japonica GN=Os01g0762500 PE=2 SV=1	56782	50.9	9.09	0.0071	16516	70.13	VEHGLSLLQPYASLQEQEQGQVQSR
Q0JJ36	Glutelin OS=Oryza sativa subsp. japonica GN=Os01g0762500 PE=2 SV=1	56782	50.9	9.09	-0.0096	16700	87.13	GITGPTFPGCPESYQQQFQQSGQAQLTESQSQSQK
Q0JJ36	Glutelin OS=Oryza sativa subsp. japonica GN=Os01g0762500 PE=2 SV=1	56782	50.9	9.09	-0.0008	16701	86.42	GITGPTFPGCPESYQQQFQQSGQAQLTESQSQSQK
Q0JJ36	Glutelin OS=Oryza sativa subsp. japonica GN=Os01g0762500 PE=2 SV=1	56782	50.9	9.09	-0.0004	16702	35.82	GITGPTFPGCPESYQQQFQQSGQAQLTESQSQSQK
Q0JJ36	Glutelin OS=Oryza sativa subsp. japonica GN=Os01g0762500 PE=2 SV=1	56782	50.9	9.09	0.0017	16703	51.6	GITGPTFPGCPESYQQQFQQSGQAQLTESQSQSQK
Q0JJ36	Glutelin OS=Oryza sativa subsp. japonica GN=Os01g0762500 PE=2 SV=1	56782	50.9	9.09	0.0018	16704	62.05	GITGPTFPGCPESYQQQFQQSGQAQLTESQSQSQK
Q0JJ36	Glutelin OS=Oryza sativa subsp. japonica GN=Os01g0762500 PE=2 SV=1	56782	50.9	9.09	0.0028	16705	87.27	GITGPTFPGCPESYQQQFQQSGQAQLTESQSQSQK
Q0JJ36	Glutelin OS=Oryza sativa subsp. japonica GN=Os01g0762500 PE=2 SV=1	56782	50.9	9.09	0.004	16706	30.68	GITGPTFPGCPESYQQQFQQSGQAQLTESQSQSQK
Q0JJ36	Glutelin OS=Oryza sativa subsp. japonica GN=Os01g0762500 PE=2 SV=1	56782	50.9	9.09	0.0043	16707	58.05	GITGPTFPGCPESYQQQFQQSGQAQLTESQSQSQK
Q0JJ36	Glutelin OS=Oryza sativa subsp. japonica GN=Os01g0762500 PE=2 SV=1	56782	50.9	9.09	0.0083	16708	62.9	GITGPTFPGCPESYQQQFQQSGQAQLTESQSQSQK
Q0JJ36	Glutelin OS=Oryza sativa subsp. japonica GN=Os01g0762500 PE=2 SV=1	56782	50.9	9.09	0.0084	16709	76.46	GITGPTFPGCPESYQQQFQQSGQAQLTESQSQSQK
P07730	Glutelin type-A 2 OS=Oryza sativa subsp. japonica GN=GLUA2 PE=1 SV=1	56841	44.9	8.93	-0.0004	10277	58.23	ALPTDVLANAYR
P07730	Glutelin type-A 2 OS=Oryza sativa subsp. japonica GN=GLUA2 PE=1 SV=1	56841	44.9	8.93	-0.0001	10278	63.28	ALPTDVLANAYR
P07730	Glutelin type-A 2 OS=Oryza sativa subsp. japonica GN=GLUA2 PE=1 SV=1	56841	44.9	8.93	0.0003	10279	57.22	ALPTDVLANAYR
P07730	Glutelin type-A 2 OS=Oryza sativa subsp. japonica GN=GLUA2 PE=1 SV=1	56841	44.9	8.93	0.0009	10283	50.69	ALPTDVLANAYR
P07730	Glutelin type-A 2 OS=Oryza sativa subsp. japonica GN=GLUA2 PE=1 SV=1	56841	44.9	8.93	0.0011	10285	48.3	ALPTDVLANAYR
P07730	Glutelin type-A 2 OS=Oryza sativa subsp. japonica GN=GLUA2 PE=1 SV=1	56841	44.9	8.93	0.0016	10288	49.33	ALPTDVLANAYR
P07730	Glutelin type-A 2 OS=Oryza sativa subsp. japonica GN=GLUA2 PE=1 SV=1	56841	44.9	8.93	0.0025	10292	43.88	ALPTDVLANAYR
P07730	Glutelin type-A 2 OS=Oryza sativa subsp. japonica GN=GLUA2 PE=1 SV=1	56841	44.9	8.93	-0.0003	11313	23.08	SYQDVYNVAESS
P07730	Glutelin type-A 2 OS=Oryza sativa subsp. japonica GN=GLUA2 PE=1 SV=1	56841	44.9	8.93	0.0012	12609	49.53	GDEFGAFTPLQYK
P07730	Glutelin type-A 2 OS=Oryza sativa subsp. japonica GN=GLUA2 PE=1 SV=1	56841	44.9	8.93	0.0013	16295	79.11	VTNLNSQNFPILNLVQMSAVK
P07730	Glutelin type-A 2 OS=Oryza sativa subsp. japonica GN=GLUA2 PE=1 SV=1	56841	44.9	8.93	-0.0005	16386	63.56	GLSLLQPYASLQEQEQGQMQSR
P07730	Glutelin type-A 2 OS=Oryza sativa subsp. japonica GN=GLUA2 PE=1 SV=1	56841	44.9	8.93	0	16387	48.56	GLSLLQPYASLQEQEQGQMQSR
P07730	Glutelin type-A 2 OS=Oryza sativa subsp. japonica GN=GLUA2 PE=1 SV=1	56841	44.9	8.93	0.0002	16388	50.52	GLSLLQPYASLQEQEQGQMQSR
P07730	Glutelin type-A 2 OS=Oryza sativa subsp. japonica GN=GLUA2 PE=1 SV=1	56841	44.9	8.93	0.0004	16389	53.45	GLSLLQPYASLQEQEQGQMQSR
P07730	Glutelin type-A 2 OS=Oryza sativa subsp. japonica GN=GLUA2 PE=1 SV=1	56841	44.9	8.93	0.0012	16390	36.84	GLSLLQPYASLQEQEQGQMQSR
P07730	Glutelin type-A 2 OS=Oryza sativa subsp. japonica GN=GLUA2 PE=1 SV=1	56841	44.9	8.93	0.0034	16391	131.24	GLSLLQPYASLQEQEQGQMQSR
P07730	Glutelin type-A 2 OS=Oryza sativa subsp. japonica GN=GLUA2 PE=1 SV=1	56841	44.9	8.93	0.0038	16392	105.46	GLSLLQPYASLQEQEQGQMQSR
P07730	Glutelin type-A 2 OS=Oryza sativa subsp. japonica GN=GLUA2 PE=1 SV=1	56841	44.9	8.93	0.0048	16393	95.42	GLSLLQPYASLQEQEQGQMQSR
P07730	Glutelin type-A 2 OS=Oryza sativa subsp. japonica GN=GLUA2 PE=1 SV=1	56841	44.9	8.93	0.0054	16394	68.99	GLSLLQPYASLQEQEQGQMQSR
P07730	Glutelin type-A 2 OS=Oryza sativa subsp. japonica GN=GLUA2 PE=1 SV=1	56841	44.9	8.93	-0.0008	16399	46.05	GLSLLQPYASLQEQEQGQMQSR
P07730	Glutelin type-A 2 OS=Oryza sativa subsp. japonica GN=GLUA2 PE=1 SV=1	56841	44.9	8.93	0.0062	16400	85.15	GLSLLQPYASLQEQEQGQMQSR
P07730	Glutelin type-A 2 OS=Oryza sativa subsp. japonica GN=GLUA2 PE=1 SV=1	56841	44.9	8.93	0.0027	16489	108.95	SQAGTTEFFDVSNELFQCTGVSVVR
P07730	Glutelin type-A 2 OS=Oryza sativa subsp. japonica GN=GLUA2 PE=1 SV=1	56841	44.9	8.93	-0.0133	16713	24.33	GITGPTFPGCPETYQQQFQQSGQAQLTESQSQSHK
P07730	Glutelin type-A 2 OS=Oryza sativa subsp. japonica GN=GLUA2 PE=1 SV=1	56841	44.9	8.93	-0.0129	16714	32.14	GITGPTFPGCPETYQQQFQQSGQAQLTESQSQSHK
P07730	Glutelin type-A 2 OS=Oryza sativa subsp. japonica GN=GLUA2 PE=1 SV=1	56841	44.9	8.93	-0.0096	16715	70.35	GITGPTFPGCPETYQQQFQQSGQAQLTESQSQSHK
P07730	Glutelin type-A 2 OS=Oryza sativa subsp. japonica GN=GLUA2 PE=1 SV=1	56841	44.9	8.93	-0.0001	16716	50.32	GITGPTFPGCPETYQQQFQQSGQAQLTESQSQSHK
P07730	Glutelin type-A 2 OS=Oryza sativa subsp. japonica GN=GLUA2 PE=1 SV=1	56841	44.9	8.93	0.0068	16717	31.68	GITGPTFPGCPETYQQQFQQSGQAQLTESQSQSHK
Q6Z7B0	Dnak-type molecular chaperone Bip OS=Oryza sativa subsp. japonica GN=P0036E06.29 PE=2 SV=1	73573	33.2	5.09	-0.0014	230	22.01	TIFDVK
Q6Z7B0	Dnak-type molecular chaperone Bip OS=Oryza sativa subsp. japonica GN=P0036E06.29 PE=2 SV=1	73573	33.2	5.09	-0.0031	528	23.21	VQQLLR
Q6Z7B0	Dnak-type molecular chaperone Bip OS=Oryza sativa subsp. japonica GN=P0036E06.29 PE=2 SV=1	73573	33.2	5.09	-0.0009	530	25.83	VQQLLR
Q6Z7B0	Dnak-type molecular chaperone Bip OS=Oryza sativa subsp. japonica GN=P0036E06.29 PE=2 SV=1	73573	33.2	5.09	-0.0007	531	44.99	VQQLLR
Q6Z7B0	Dnak-type molecular chaperone Bip OS=Oryza sativa subsp. japonica GN=P0036E06.29 PE=2 SV=1	73573	33.2	5.09	-0.0005	532	41.93	VQQLLR
Q6Z7B0	Dnak-type molecular chaperone Bip OS=Oryza sativa subsp. japonica GN=P0036E06.29 PE=2 SV=1	73573	33.2	5.09	-0.0004	533	36.37	VQQLLR
Q6Z7B0	Dnak-type molecular chaperone Bip OS=Oryza sativa subsp. japonica GN=P0036E06.29 PE=2 SV=1	73573	33.2	5.09	-0.0004	534	38.49	VQQLLR
Q6Z7B0	Dnak-type molecular chaperone Bip OS=Oryza sativa subsp. japonica GN=P0036E06.29 PE=2 SV=1	73573	33.2	5.09	0	535	36.52	VQQLLR
Q6Z7B0	Dnak-type molecular chaperone Bip OS=Oryza sativa subsp. japonica GN=P0036E06.29 PE=2 SV=1	73573	33.2	5.09	0.0002	536	21.02	VQQLLR
Q6Z7B0	Dnak-type molecular chaperone Bip OS=Oryza sativa subsp. japonica GN=P0036E06.29 PE=2 SV=1	73573	33.2	5.09	0.0004	537	36.77	VQQLLR
Q6Z7B0	Dnak-type molecular chaperone Bip OS=Oryza sativa subsp. japonica GN=P0036E06.29 PE=2 SV=1	73573	33.2	5.09	0.0005	538	24.93	VQQLLR
Q6Z7B0	Dnak-type molecular chaperone Bip OS=Oryza sativa subsp. japonica GN=P0036E06.29 PE=2 SV=1	73573	33.2	5.09	-0.0002	1490	28.53	ITITNEK
Q6Z7B0	Dnak-type molecular chaperone Bip OS=Oryza sativa subsp. japonica GN=P0036E06.29 PE=2 SV=1	73573	33.2	5.09	-0.0002	1491	27.71	ITITNEK
Q6Z7B0	Dnak-type molecular chaperone Bip OS=Oryza sativa subsp. japonica GN=P0036E06.29 PE=2 SV=1	73573	33.2	5.09	0.0004	1494	34.92	ITITNEK
Q6Z7B0	Dnak-type molecular chaperone Bip OS=Oryza sativa subsp. japonica GN=P0036E06.29 PE=2 SV=1	73573	33.2	5.09	0.0004	1495	25.62	ITITNEK
Q6Z7B0	Dnak-type molecular chaperone Bip OS=Oryza sativa subsp. japonica GN=P0036E06.29 PE=2 SV=1	73573	33.2	5.09	-0.0001	3554	20.53	AMDDAGLEK
Q6Z7B0	Dnak-type molecular chaperone Bip OS=Oryza sativa subsp. japonica GN=P0036E06.29 PE=2 SV=1	73573	33.2	5.09	0.002	3720	22.2	IMEYFIK
Q6Z7B0	Dnak-type molecular chaperone Bip OS=Oryza sativa subsp. japonica GN=P0036E06.29 PE=2 SV=1	73573	33.2	5.09	0.0001	3841	37.39	AMDDAGLEK
Q6Z7B0	Dnak-type molecular chaperone Bip OS=Oryza sativa subsp. japonica GN=P0036E06.29 PE=2 SV=1	73573	33.2	5.09	0.0004	5438	30.33	FEDKEVQR
Q6Z7B0	Dnak-type molecular chaperone Bip OS=Oryza sativa subsp. japonica GN=P0036E06.29 PE=2 SV=1	73573	33.2	5.09	0.0017	5439	48.15	FEDKEVQR
Q6Z7B0	Dnak-type molecular chaperone Bip OS=Oryza sativa subsp. japonica GN=P0036E06.29 PE=2 SV=1	73573	33.2	5.09	0.0013	7360	22.86	FDLSGIPAAPR
Q6Z7B0	Dnak-type molecular chaperone Bip OS=Oryza sativa subsp. japonica GN=P0036E06.29 PE=2 SV=1	73573	33.2	5.09	-0.0082	7610	26.68	DAGVIAGLNVAR
Q6Z7B0	Dnak-type molecular chaperone Bip OS=Oryza sativa subsp. japonica GN=P0036E06.29 PE=2 SV=1	73573	33.2	5.09	-0.0059	7611	26.46	DAGVIAGLNVAR
Q6Z7B0	Dnak-type molecular chaperone Bip OS=Oryza sativa subsp. japonica GN=P0036E06.29 PE=2 SV=1	73573	33.2	5.09	-0.0043	7612	40.9	DAGVIAGLNVAR
Q6Z7B0	Dnak-type molecular chaperone Bip OS=Oryza sativa subsp. japonica GN=P0036E06.29 PE=2 SV=1	73573	33.2	5.09	0.0006	10131	81.89	FEELNNDLFR
Q6Z7B0	Dnak-type molecular chaperone Bip OS=Oryza sativa subsp. japonica GN=P0036E06.29 PE=2 SV=1	73573	33.2	5.09	0.0003	10687	29.65	EAEEFAEEDKK
Q6Z7B0	Dnak-type molecular chaperone Bip OS=Oryza sativa subsp. japonica GN=P0036E06.29 PE=2 SV=1	73573	33.2	5.09	0.0004	10688	61.47	EAEEFAEEDKK
Q6Z7B0	Dnak-type molecular chaperone Bip OS=Oryza sativa subsp. japonica GN=P0036E06.29 PE=2 SV=1	73573	33.2	5.09	-0.0023	11910	38.52	NQLETYVYNMK
Q6Z7B0	Dnak-type molecular chaperone Bip OS=Oryza sativa subsp. japonica GN=P0036E06.29 PE=2 SV=1	73573	33.2	5.09	-0.0013	11911	60.29	NQLETYVYNMK
Q6Z7B0	Dnak-type molecular chaperone Bip OS=Oryza sativa subsp. japonica GN=P0036E06.29 PE=2 SV=1	73573	33.2	5.09	0.0003	12133	23.71	NQLETYVYNMK
Q6Z7B0	Dnak-type molecular chaperone Bip OS=Oryza sativa subsp. japonica GN=P0036E06.29 PE=2 SV=1	73573	33.2	5.09	-0.0008	12889	83.06	VFSPEEVSAMILGK
Q6Z7B0	Dnak-type molecular chaperone Bip OS=Oryza sativa subsp. japonica GN=P0036E06.29 PE=2 SV=1	73573	33.2	5.09	-0.0023	12906	47.89	ITPSWVAFTDSER
Q6Z7B0	Dnak-type molecular chaperone Bip OS=Oryza sativa subsp. japonica GN=P0036E06.29 PE=2 SV=1	73573	33.2	5.09	0.0048	15220	55.35	EVEAVCNPIISAVYQR
Q6Z7B0	Dnak-type molecular chaperone Bip OS=Oryza sativa subsp. japonica GN=P0036E06.29 PE=2 SV=1	73573	33.2	5.09	0.0094	15348	45.92	INDAVVTVPAYFNDAQR
Q6Z7B0	Dnak-type molecular chaperone Bip OS=Oryza sativa subsp. japonica GN=P0036E06.29 PE=2 SV=1	73573	33.2	5.09	0.0128	15349	30.6	INDAVVTVPAYFNDAQR
Q6Z7B0	Dnak-type molecular chaperone Bip OS=Oryza sativa subsp. japonica GN=P0036E06.29 PE=2 SV=1	73573	33.2	5.09	-0.0027	15616	42.46	TGGAPGGGADGEGGVDDEHDEL
Q6Z7B0	Dnak-type molecular chaperone Bip OS=Oryza sativa subsp. japonica GN=P0036E06.29 PE=2 SV=1	73573	33.2	5.09	-0.0005	15617	48.19	TGGAPGGGADGEGGVDDEHDEL
Q6Z7B0	Dnak-type molecular chaperone Bip OS=Oryza sativa subsp. japonica GN=P0036E06.29 PE=2 SV=1	73573	33.2	5.09	-0.0004	15618	74.59	TGGAPGGGADGEGGVDDEHDEL
Q6Z7B0	Dnak-type molecular chaperone Bip OS=Oryza sativa subsp. japonica GN=P0036E06.29 PE=2 SV=1	73573	33.2	5.09	-0.0004	15619	51.04	TGGAPGGGADGEGGVDDEHDEL
Q6Z7B0	Dnak-type molecular chaperone Bip OS=Oryza sativa subsp. japonica GN=P0036E06.29 PE=2 SV=1	73573	33.2	5.09	-0.0001	15620	62.28	TGGAPGGGADGEGGVDDEHDEL
Q6Z7B0	Dnak-type molecular chaperone Bip OS=Oryza sativa subsp. japonica GN=P0036E06.29 PE=2 SV=1	73573	33.2	5.09	-0.0001	15621	56.74	TGGAPGGGADGEGGVDDEHDEL
Q6Z7B0	Dnak-type molecular chaperone Bip OS=Oryza sativa subsp. japonica GN=P0036E06.29 PE=2 SV=1	73573	33.2	5.09	0.0001	15622	39.5	TGGAPGGGADGEGGVDDEHDEL
Q6Z7B0	Dnak-type molecular chaperone Bip OS=Oryza sativa subsp. japonica GN=P0036E06.29 PE=2 SV=1	73573	33.2	5.09	0.0001	15623	56.09	TGGAPGGGADGEGGVDDEHDEL
Q6Z7B0	Dnak-type molecular chaperone Bip OS=Oryza sativa subsp. japonica GN=P0036E06.29 PE=2 SV=1	73573	33.2	5.09	0.0004	15624	46.3	TGGAPGGGADGEGGVDDEHDEL
Q6Z7B0	Dnak-type molecular chaperone Bip OS=Oryza sativa subsp. japonica GN=P0036E06.29 PE=2 SV=1	73573	33.2	5.09	0.0005	15625	55.65	TGGAPGGGADGEGGVDDEHDEL
Q6Z7B0	Dnak-type molecular chaperone Bip OS=Oryza sativa subsp. japonica GN=P0036E06.29 PE=2 SV=1	73573	33.2	5.09	0.0007	15626	61.77	TGGAPGGGADGEGGVDDEHDEL
Q6Z7B0	Dnak-type molecular chaperone Bip OS=Oryza sativa subsp. japonica GN=P0036E06.29 PE=2 SV=1	73573	33.2	5.09	0.0011	15627	59.78	TGGAPGGGADGEGGVDDEHDEL
Q6Z7B0	Dnak-type molecular chaperone Bip OS=Oryza sativa subsp. japonica GN=P0036E06.29 PE=2 SV=1	73573	33.2	5.09	0.0012	15628	39.72	TGGAPGGGADGEGGVDDEHDEL
Q5VNT5	Glucose-1-phosphate adenylyltransferase OS=Oryza sativa subsp. japonica GN=P0663E10.9 PE=3 SV=1	57742	34.2	5.48	-0.0002	113	29.81	LLFEGK
Q5VNT5	Glucose-1-phosphate adenylyltransferase OS=Oryza sativa subsp. japonica GN=P0663E10.9 PE=3 SV=1	57742	34.2	5.48	-0.0001	2883	60.23	VSIGCELK
Q5VNT5	Glucose-1-phosphate adenylyltransferase OS=Oryza sativa subsp. japonica GN=P0663E10.9 PE=3 SV=1	57742	34.2	5.48	0	2884	28.7	VSIGCELK
Q5VNT5	Glucose-1-phosphate adenylyltransferase OS=Oryza sativa subsp. japonica GN=P0663E10.9 PE=3 SV=1	57742	34.2	5.48	0.0001	2885	32.9	VSIGCELK
Q5VNT5	Glucose-1-phosphate adenylyltransferase OS=Oryza sativa subsp. japonica GN=P0663E10.9 PE=3 SV=1	57742	34.2	5.48	0.0004	2886	30.59	VSIGCELK
Q5VNT5	Glucose-1-phosphate adenylyltransferase OS=Oryza sativa subsp. japonica GN=P0663E10.9 PE=3 SV=1	57742	34.2	5.48	-0.0022	5110	24.78	VPIGIGENTK
Q5VNT5	Glucose-1-phosphate adenylyltransferase OS=Oryza sativa subsp. japonica GN=P0663E10.9 PE=3 SV=1	57742	34.2	5.48	-0.002	5111	28.49	VPIGIGENTK
Q5VNT5	Glucose-1-phosphate adenylyltransferase OS=Oryza sativa subsp. japonica GN=P0663E10.9 PE=3 SV=1	57742	34.2	5.48	-0.0014	5113	21.52	VPIGIGENTK
Q5VNT5	Glucose-1-phosphate adenylyltransferase OS=Oryza sativa subsp. japonica GN=P0663E10.9 PE=3 SV=1	57742	34.2	5.48	-0.001	5115	35.87	VPIGIGENTK
Q5VNT5	Glucose-1-phosphate adenylyltransferase OS=Oryza sativa subsp. japonica GN=P0663E10.9 PE=3 SV=1	57742	34.2	5.48	-0.0008	5116	22.54	VPIGIGENTK
Q5VNT5	Glucose-1-phosphate adenylyltransferase OS=Oryza sativa subsp. japonica GN=P0663E10.9 PE=3 SV=1	57742	34.2	5.48	-0.0004	5118	23.2	VPIGIGENTK
Q5VNT5	Glucose-1-phosphate adenylyltransferase OS=Oryza sativa subsp. japonica GN=P0663E10.9 PE=3 SV=1	57742	34.2	5.48	0.0007	5122	21.83	VPIGIGENTK
Q5VNT5	Glucose-1-phosphate adenylyltransferase OS=Oryza sativa subsp. japonica GN=P0663E10.9 PE=3 SV=1	57742	34.2	5.48	0.0017	5123	20.96	VPIGIGENTK
Q5VNT5	Glucose-1-phosphate adenylyltransferase OS=Oryza sativa subsp. japonica GN=P0663E10.9 PE=3 SV=1	57742	34.2	5.48	-0.0028	6172	21.37	LNIGGMTQEK
Q5VNT5	Glucose-1-phosphate adenylyltransferase OS=Oryza sativa subsp. japonica GN=P0663E10.9 PE=3 SV=1	57742	34.2	5.48	-0.0003	6173	31.19	LNIGGMTQEK
Q5VNT5	Glucose-1-phosphate adenylyltransferase OS=Oryza sativa subsp. japonica GN=P0663E10.9 PE=3 SV=1	57742	34.2	5.48	-0.0001	6174	27.31	LNIGGMTQEK
Q5VNT5	Glucose-1-phosphate adenylyltransferase OS=Oryza sativa subsp. japonica GN=P0663E10.9 PE=3 SV=1	57742	34.2	5.48	0	6175	20.98	LNIGGMTQEK
Q5VNT5	Glucose-1-phosphate adenylyltransferase OS=Oryza sativa subsp. japonica GN=P0663E10.9 PE=3 SV=1	57742	34.2	5.48	0.0002	6176	67.87	LNIGGMTQEK
Q5VNT5	Glucose-1-phosphate adenylyltransferase OS=Oryza sativa subsp. japonica GN=P0663E10.9 PE=3 SV=1	57742	34.2	5.48	0.0005	6178	31.19	LNIGGMTQEK
Q5VNT5	Glucose-1-phosphate adenylyltransferase OS=Oryza sativa subsp. japonica GN=P0663E10.9 PE=3 SV=1	57742	34.2	5.48	0.0006	6179	31.32	LNIGGMTQEK
Q5VNT5	Glucose-1-phosphate adenylyltransferase OS=Oryza sativa subsp. japonica GN=P0663E10.9 PE=3 SV=1	57742	34.2	5.48	0.001	6180	24.3	LNIGGMTQEK
Q5VNT5	Glucose-1-phosphate adenylyltransferase OS=Oryza sativa subsp. japonica GN=P0663E10.9 PE=3 SV=1	57742	34.2	5.48	0	6462	30.05	NCIIDMNAR
Q5VNT5	Glucose-1-phosphate adenylyltransferase OS=Oryza sativa subsp. japonica GN=P0663E10.9 PE=3 SV=1	57742	34.2	5.48	0.0001	6463	37.01	NCIIDMNAR
Q5VNT5	Glucose-1-phosphate adenylyltransferase OS=Oryza sativa subsp. japonica GN=P0663E10.9 PE=3 SV=1	57742	34.2	5.48	0.0007	6464	30.11	NCIIDMNAR
Q5VNT5	Glucose-1-phosphate adenylyltransferase OS=Oryza sativa subsp. japonica GN=P0663E10.9 PE=3 SV=1	57742	34.2	5.48	-0.0025	7310	53.48	CFGDGVTGTAR
Q5VNT5	Glucose-1-phosphate adenylyltransferase OS=Oryza sativa subsp. japonica GN=P0663E10.9 PE=3 SV=1	57742	34.2	5.48	-0.0022	7311	55.42	CFGDGVTGTAR
Q5VNT5	Glucose-1-phosphate adenylyltransferase OS=Oryza sativa subsp. japonica GN=P0663E10.9 PE=3 SV=1	57742	34.2	5.48	-0.0018	7312	60.05	CFGDGVTGTAR
Q5VNT5	Glucose-1-phosphate adenylyltransferase OS=Oryza sativa subsp. japonica GN=P0663E10.9 PE=3 SV=1	57742	34.2	5.48	-0.0015	7313	27.58	CFGDGVTGTAR
Q5VNT5	Glucose-1-phosphate adenylyltransferase OS=Oryza sativa subsp. japonica GN=P0663E10.9 PE=3 SV=1	57742	34.2	5.48	-0.0012	7314	59.06	CFGDGVTGTAR
Q5VNT5	Glucose-1-phosphate adenylyltransferase OS=Oryza sativa subsp. japonica GN=P0663E10.9 PE=3 SV=1	57742	34.2	5.48	-0.0008	7315	45.11	CFGDGVTGTAR
Q5VNT5	Glucose-1-phosphate adenylyltransferase OS=Oryza sativa subsp. japonica GN=P0663E10.9 PE=3 SV=1	57742	34.2	5.48	-0.0007	7316	58.87	CFGDGVTGTAR
Q5VNT5	Glucose-1-phosphate adenylyltransferase OS=Oryza sativa subsp. japonica GN=P0663E10.9 PE=3 SV=1	57742	34.2	5.48	-0.0007	7317	22.32	CFGDGVTGTAR
Q5VNT5	Glucose-1-phosphate adenylyltransferase OS=Oryza sativa subsp. japonica GN=P0663E10.9 PE=3 SV=1	57742	34.2	5.48	-0.0001	7318	61.91	CFGDGVTGTAR
Q5VNT5	Glucose-1-phosphate adenylyltransferase OS=Oryza sativa subsp. japonica GN=P0663E10.9 PE=3 SV=1	57742	34.2	5.48	-0.0007	9168	35.79	ATPAVPVGGCYR
Q5VNT5	Glucose-1-phosphate adenylyltransferase OS=Oryza sativa subsp. japonica GN=P0663E10.9 PE=3 SV=1	57742	34.2	5.48	-0.0006	9169	27.37	ATPAVPVGGCYR
Q5VNT5	Glucose-1-phosphate adenylyltransferase OS=Oryza sativa subsp. japonica GN=P0663E10.9 PE=3 SV=1	57742	34.2	5.48	-0.0003	9170	24.82	ATPAVPVGGCYR
Q5VNT5	Glucose-1-phosphate adenylyltransferase OS=Oryza sativa subsp. japonica GN=P0663E10.9 PE=3 SV=1	57742	34.2	5.48	-0.0002	9171	36.09	ATPAVPVGGCYR
Q5VNT5	Glucose-1-phosphate adenylyltransferase OS=Oryza sativa subsp. japonica GN=P0663E10.9 PE=3 SV=1	57742	34.2	5.48	-0.0002	9172	43.45	ATPAVPVGGCYR
Q5VNT5	Glucose-1-phosphate adenylyltransferase OS=Oryza sativa subsp. japonica GN=P0663E10.9 PE=3 SV=1	57742	34.2	5.48	0	9173	38.58	ATPAVPVGGCYR
Q5VNT5	Glucose-1-phosphate adenylyltransferase OS=Oryza sativa subsp. japonica GN=P0663E10.9 PE=3 SV=1	57742	34.2	5.48	-0.0009	11492	70.23	PLDTNACAQPMR
Q5VNT5	Glucose-1-phosphate adenylyltransferase OS=Oryza sativa subsp. japonica GN=P0663E10.9 PE=3 SV=1	57742	34.2	5.48	-0.0003	11493	77.2	PLDTNACAQPMR
Q5VNT5	Glucose-1-phosphate adenylyltransferase OS=Oryza sativa subsp. japonica GN=P0663E10.9 PE=3 SV=1	57742	34.2	5.48	-0.0001	11494	87.43	PLDTNACAQPMR
Q5VNT5	Glucose-1-phosphate adenylyltransferase OS=Oryza sativa subsp. japonica GN=P0663E10.9 PE=3 SV=1	57742	34.2	5.48	-0.0025	11744	35.37	PLDTNACAQPMR
Q5VNT5	Glucose-1-phosphate adenylyltransferase OS=Oryza sativa subsp. japonica GN=P0663E10.9 PE=3 SV=1	57742	34.2	5.48	-0.0003	11745	52.57	PLDTNACAQPMR
Q5VNT5	Glucose-1-phosphate adenylyltransferase OS=Oryza sativa subsp. japonica GN=P0663E10.9 PE=3 SV=1	57742	34.2	5.48	0.0003	11746	50.7	PLDTNACAQPMR
Q5VNT5	Glucose-1-phosphate adenylyltransferase OS=Oryza sativa subsp. japonica GN=P0663E10.9 PE=3 SV=1	57742	34.2	5.48	0.0007	11747	31.35	PLDTNACAQPMR
Q5VNT5	Glucose-1-phosphate adenylyltransferase OS=Oryza sativa subsp. japonica GN=P0663E10.9 PE=3 SV=1	57742	34.2	5.48	0.002	14042	52.66	IFVMTQFNSASLNR
Q5VNT5	Glucose-1-phosphate adenylyltransferase OS=Oryza sativa subsp. japonica GN=P0663E10.9 PE=3 SV=1	57742	34.2	5.48	-0.0002	14280	108.19	SFFDANLALTEQPPK
Q5VNT5	Glucose-1-phosphate adenylyltransferase OS=Oryza sativa subsp. japonica GN=P0663E10.9 PE=3 SV=1	57742	34.2	5.48	-0.0013	15755	159.75	HVDDNADITISCAPIDGSR
Q5VNT5	Glucose-1-phosphate adenylyltransferase OS=Oryza sativa subsp. japonica GN=P0663E10.9 PE=3 SV=1	57742	34.2	5.48	0.0009	15756	55.87	HVDDNADITISCAPIDGSR
Q5VNT5	Glucose-1-phosphate adenylyltransferase OS=Oryza sativa subsp. japonica GN=P0663E10.9 PE=3 SV=1	57742	34.2	5.48	0.0009	15757	45.69	HVDDNADITISCAPIDGSR
Q5VNT5	Glucose-1-phosphate adenylyltransferase OS=Oryza sativa subsp. japonica GN=P0663E10.9 PE=3 SV=1	57742	34.2	5.48	0.0127	15758	118.46	HVDDNADITISCAPIDGSR
Q5VNT5	Glucose-1-phosphate adenylyltransferase OS=Oryza sativa subsp. japonica GN=P0663E10.9 PE=3 SV=1	57742	34.2	5.48	0.0014	15811	88.75	DTMMMGADQYETEEETSK
Q5VNT5	Glucose-1-phosphate adenylyltransferase OS=Oryza sativa subsp. japonica GN=P0663E10.9 PE=3 SV=1	57742	34.2	5.48	0.0019	15812	46.33	DTMMMGADQYETEEETSK
Q5VNT5	Glucose-1-phosphate adenylyltransferase OS=Oryza sativa subsp. japonica GN=P0663E10.9 PE=3 SV=1	57742	34.2	5.48	0.0029	15813	93.75	DTMMMGADQYETEEETSK
Q5VNT5	Glucose-1-phosphate adenylyltransferase OS=Oryza sativa subsp. japonica GN=P0663E10.9 PE=3 SV=1	57742	34.2	5.48	0.0083	15814	86.2	DTMMMGADQYETEEETSK
Q0E2D2	Glutelin OS=Oryza sativa subsp. japonica GN=Os02g0249800 PE=2 SV=1	56915	38.7	9.26	-0.0003	1518	45.07	ADSYNPR
Q0E2D2	Glutelin OS=Oryza sativa subsp. japonica GN=Os02g0249800 PE=2 SV=1	56915	38.7	9.26	-0.0003	1519	44.31	ADSYNPR
Q0E2D2	Glutelin OS=Oryza sativa subsp. japonica GN=Os02g0249800 PE=2 SV=1	56915	38.7	9.26	-0.0002	1520	52.56	ADSYNPR
Q0E2D2	Glutelin OS=Oryza sativa subsp. japonica GN=Os02g0249800 PE=2 SV=1	56915	38.7	9.26	-0.0002	1521	33.05	ADSYNPR
Q0E2D2	Glutelin OS=Oryza sativa subsp. japonica GN=Os02g0249800 PE=2 SV=1	56915	38.7	9.26	0	1522	29.22	ADSYNPR
Q0E2D2	Glutelin OS=Oryza sativa subsp. japonica GN=Os02g0249800 PE=2 SV=1	56915	38.7	9.26	0.0001	1523	34.39	ADSYNPR
Q0E2D2	Glutelin OS=Oryza sativa subsp. japonica GN=Os02g0249800 PE=2 SV=1	56915	38.7	9.26	-0.0004	2540	24.54	ITSVNSQK
Q0E2D2	Glutelin OS=Oryza sativa subsp. japonica GN=Os02g0249800 PE=2 SV=1	56915	38.7	9.26	0.0002	5911	24.81	EGCQYIAIK
Q0E2D2	Glutelin OS=Oryza sativa subsp. japonica GN=Os02g0249800 PE=2 SV=1	56915	38.7	9.26	0.0003	5912	27.53	EGCQYIAIK
Q0E2D2	Glutelin OS=Oryza sativa subsp. japonica GN=Os02g0249800 PE=2 SV=1	56915	38.7	9.26	0.0004	5913	24.73	EGCQYIAIK
Q0E2D2	Glutelin OS=Oryza sativa subsp. japonica GN=Os02g0249800 PE=2 SV=1	56915	38.7	9.26	0.0006	5914	21.04	EGCQYIAIK
Q0E2D2	Glutelin OS=Oryza sativa subsp. japonica GN=Os02g0249800 PE=2 SV=1	56915	38.7	9.26	0.0007	5916	31.31	EGCQYIAIK
Q0E2D2	Glutelin OS=Oryza sativa subsp. japonica GN=Os02g0249800 PE=2 SV=1	56915	38.7	9.26	0.0007	5917	34.12	EGCQYIAIK
Q0E2D2	Glutelin OS=Oryza sativa subsp. japonica GN=Os02g0249800 PE=2 SV=1	56915	38.7	9.26	0.0008	5918	24.9	EGCQYIAIK
Q0E2D2	Glutelin OS=Oryza sativa subsp. japonica GN=Os02g0249800 PE=2 SV=1	56915	38.7	9.26	0.0009	5920	37.24	EGCQYIAIK
Q0E2D2	Glutelin OS=Oryza sativa subsp. japonica GN=Os02g0249800 PE=2 SV=1	56915	38.7	9.26	0.0009	5921	27.33	EGCQYIAIK
Q0E2D2	Glutelin OS=Oryza sativa subsp. japonica GN=Os02g0249800 PE=2 SV=1	56915	38.7	9.26	-0.0009	6325	23.99	GEEHGAFTPR
Q0E2D2	Glutelin OS=Oryza sativa subsp. japonica GN=Os02g0249800 PE=2 SV=1	56915	38.7	9.26	-0.0001	6327	23.53	GEEHGAFTPR
Q0E2D2	Glutelin OS=Oryza sativa subsp. japonica GN=Os02g0249800 PE=2 SV=1	56915	38.7	9.26	0.0002	6329	50.87	GEEHGAFTPR
Q0E2D2	Glutelin OS=Oryza sativa subsp. japonica GN=Os02g0249800 PE=2 SV=1	56915	38.7	9.26	0.0009	6330	63.43	GEEHGAFTPR
Q0E2D2	Glutelin OS=Oryza sativa subsp. japonica GN=Os02g0249800 PE=2 SV=1	56915	38.7	9.26	0.0001	8722	47.72	VIQPQGLLVPR
Q0E2D2	Glutelin OS=Oryza sativa subsp. japonica GN=Os02g0249800 PE=2 SV=1	56915	38.7	9.26	0.0002	8723	25.56	VIQPQGLLVPR
Q0E2D2	Glutelin OS=Oryza sativa subsp. japonica GN=Os02g0249800 PE=2 SV=1	56915	38.7	9.26	0.0005	8724	44.17	VIQPQGLLVPR
Q0E2D2	Glutelin OS=Oryza sativa subsp. japonica GN=Os02g0249800 PE=2 SV=1	56915	38.7	9.26	0.0005	8725	59.36	VIQPQGLLVPR
Q0E2D2	Glutelin OS=Oryza sativa subsp. japonica GN=Os02g0249800 PE=2 SV=1	56915	38.7	9.26	-0.0023	10779	69.33	TNANAFVSHLAGK
Q0E2D2	Glutelin OS=Oryza sativa subsp. japonica GN=Os02g0249800 PE=2 SV=1	56915	38.7	9.26	-0.0017	10780	36.49	TNANAFVSHLAGK
Q0E2D2	Glutelin OS=Oryza sativa subsp. japonica GN=Os02g0249800 PE=2 SV=1	56915	38.7	9.26	0.0049	10781	67.77	TNANAFVSHLAGK
Q0E2D2	Glutelin OS=Oryza sativa subsp. japonica GN=Os02g0249800 PE=2 SV=1	56915	38.7	9.26	-0.0008	11534	45.05	RVIQPQGLLVPR
Q0E2D2	Glutelin OS=Oryza sativa subsp. japonica GN=Os02g0249800 PE=2 SV=1	56915	38.7	9.26	-0.0005	12916	26.19	WNGLEENFCTIK
Q0E2D2	Glutelin OS=Oryza sativa subsp. japonica GN=Os02g0249800 PE=2 SV=1	56915	38.7	9.26	0.0001	13681	66.07	YTNIPGVVYIIQGR
Q0E2D2	Glutelin OS=Oryza sativa subsp. japonica GN=Os02g0249800 PE=2 SV=1	56915	38.7	9.26	-0.0029	16654	66.19	GSMGLTFPGCPATYQQQFQQFSSQGQSQSQK
Q0E2D2	Glutelin OS=Oryza sativa subsp. japonica GN=Os02g0249800 PE=2 SV=1	56915	38.7	9.26	-0.0004	16655	85.14	GSMGLTFPGCPATYQQQFQQFSSQGQSQSQK
Q0E2D2	Glutelin OS=Oryza sativa subsp. japonica GN=Os02g0249800 PE=2 SV=1	56915	38.7	9.26	0.0008	16656	31.71	GSMGLTFPGCPATYQQQFQQFSSQGQSQSQK
Q0E2D2	Glutelin OS=Oryza sativa subsp. japonica GN=Os02g0249800 PE=2 SV=1	56915	38.7	9.26	0.0041	16657	51.81	GSMGLTFPGCPATYQQQFQQFSSQGQSQSQK
Q0E2D2	Glutelin OS=Oryza sativa subsp. japonica GN=Os02g0249800 PE=2 SV=1	56915	38.7	9.26	0.0074	16658	29.03	GSMGLTFPGCPATYQQQFQQFSSQGQSQSQK
Q0E2D2	Glutelin OS=Oryza sativa subsp. japonica GN=Os02g0249800 PE=2 SV=1	56915	38.7	9.26	0.0117	16659	48.11	GSMGLTFPGCPATYQQQFQQFSSQGQSQSQK
Q0E2D2	Glutelin OS=Oryza sativa subsp. japonica GN=Os02g0249800 PE=2 SV=1	56915	38.7	9.26	0.0041	16661	68.76	GSMGLTFPGCPATYQQQFQQFSSQGQSQSQK
Q0E2D2	Glutelin OS=Oryza sativa subsp. japonica GN=Os02g0249800 PE=2 SV=1	56915	38.7	9.26	0.0104	16662	56.45	GSMGLTFPGCPATYQQQFQQFSSQGQSQSQK
Q6K7K6	Glutelin OS=Oryza sativa subsp. japonica GN=P0533E11.34-1 PE=2 SV=1	57426	34.1	8.96	-0.0008	454	26.75	CAGVSVR
Q6K7K6	Glutelin OS=Oryza sativa subsp. japonica GN=P0533E11.34-1 PE=2 SV=1	57426	34.1	8.96	-0.0002	1701	38.29	RLVVESK
Q6K7K6	Glutelin OS=Oryza sativa subsp. japonica GN=P0533E11.34-1 PE=2 SV=1	57426	34.1	8.96	0	2680	24.66	LQGLSDPR
Q6K7K6	Glutelin OS=Oryza sativa subsp. japonica GN=P0533E11.34-1 PE=2 SV=1	57426	34.1	8.96	0	2681	21.19	LQGLSDPR
Q6K7K6	Glutelin OS=Oryza sativa subsp. japonica GN=P0533E11.34-1 PE=2 SV=1	57426	34.1	8.96	0	2682	25.02	LQGLSDPR
Q6K7K6	Glutelin OS=Oryza sativa subsp. japonica GN=P0533E11.34-1 PE=2 SV=1	57426	34.1	8.96	0.0001	2684	22.08	LQGLSDPR
Q6K7K6	Glutelin OS=Oryza sativa subsp. japonica GN=P0533E11.34-1 PE=2 SV=1	57426	34.1	8.96	0.0002	2685	25.26	LQGLSDPR
Q6K7K6	Glutelin OS=Oryza sativa subsp. japonica GN=P0533E11.34-1 PE=2 SV=1	57426	34.1	8.96	-0.0004	3539	34.48	LVYIVQGR
Q6K7K6	Glutelin OS=Oryza sativa subsp. japonica GN=P0533E11.34-1 PE=2 SV=1	57426	34.1	8.96	0.0008	3541	29.72	LVYIVQGR
Q6K7K6	Glutelin OS=Oryza sativa subsp. japonica GN=P0533E11.34-1 PE=2 SV=1	57426	34.1	8.96	0.0008	3542	25.14	LVYIVQGR
Q6K7K6	Glutelin OS=Oryza sativa subsp. japonica GN=P0533E11.34-1 PE=2 SV=1	57426	34.1	8.96	-0.0002	5292	43.79	QLQPTWLR
Q6K7K6	Glutelin OS=Oryza sativa subsp. japonica GN=P0533E11.34-1 PE=2 SV=1	57426	34.1	8.96	0.0008	6197	35.82	GDEMAVFAPR
Q6K7K6	Glutelin OS=Oryza sativa subsp. japonica GN=P0533E11.34-1 PE=2 SV=1	57426	34.1	8.96	0.0009	6198	70.06	GDEMAVFAPR
Q6K7K6	Glutelin OS=Oryza sativa subsp. japonica GN=P0533E11.34-1 PE=2 SV=1	57426	34.1	8.96	-0.0012	6519	28.05	GDEMAVFAPR
Q6K7K6	Glutelin OS=Oryza sativa subsp. japonica GN=P0533E11.34-1 PE=2 SV=1	57426	34.1	8.96	0.0013	6521	31.29	GDEMAVFAPR
Q6K7K6	Glutelin OS=Oryza sativa subsp. japonica GN=P0533E11.34-1 PE=2 SV=1	57426	34.1	8.96	0.0019	6522	33.13	GDEMAVFAPR
Q6K7K6	Glutelin OS=Oryza sativa subsp. japonica GN=P0533E11.34-1 PE=2 SV=1	57426	34.1	8.96	-0.0004	10511	35.63	GLVLPMYANAHK
Q6K7K6	Glutelin OS=Oryza sativa subsp. japonica GN=P0533E11.34-1 PE=2 SV=1	57426	34.1	8.96	-0.0007	11206	48.36	TNHNAVDSQIAGK
Q6K7K6	Glutelin OS=Oryza sativa subsp. japonica GN=P0533E11.34-1 PE=2 SV=1	57426	34.1	8.96	-0.0005	11207	68.04	TNHNAVDSQIAGK
Q6K7K6	Glutelin OS=Oryza sativa subsp. japonica GN=P0533E11.34-1 PE=2 SV=1	57426	34.1	8.96	-0.0003	11208	84.15	TNHNAVDSQIAGK
Q6K7K6	Glutelin OS=Oryza sativa subsp. japonica GN=P0533E11.34-1 PE=2 SV=1	57426	34.1	8.96	-0.0002	11209	27.59	TNHNAVDSQIAGK
Q6K7K6	Glutelin OS=Oryza sativa subsp. japonica GN=P0533E11.34-1 PE=2 SV=1	57426	34.1	8.96	0.0011	11210	29.05	TNHNAVDSQIAGK
Q6K7K6	Glutelin OS=Oryza sativa subsp. japonica GN=P0533E11.34-1 PE=2 SV=1	57426	34.1	8.96	-0.0009	14084	111.55	SEAGFTEYYNIEAR
Q6K7K6	Glutelin OS=Oryza sativa subsp. japonica GN=P0533E11.34-1 PE=2 SV=1	57426	34.1	8.96	-0.0007	14085	77.2	SEAGFTEYYNIEAR
Q6K7K6	Glutelin OS=Oryza sativa subsp. japonica GN=P0533E11.34-1 PE=2 SV=1	57426	34.1	8.96	-0.0002	14086	78.18	SEAGFTEYYNIEAR
Q6K7K6	Glutelin OS=Oryza sativa subsp. japonica GN=P0533E11.34-1 PE=2 SV=1	57426	34.1	8.96	0	15450	83.7	GVFGMALPGCPETFQSVR
Q6K7K6	Glutelin OS=Oryza sativa subsp. japonica GN=P0533E11.34-1 PE=2 SV=1	57426	34.1	8.96	0.0019	15496	76.08	GVFGMALPGCPETFQSVR
Q6K7K6	Glutelin OS=Oryza sativa subsp. japonica GN=P0533E11.34-1 PE=2 SV=1	57426	34.1	8.96	-0.0038	15597	27.44	SPFEQEVATAGEAQSSIQK
Q6K7K6	Glutelin OS=Oryza sativa subsp. japonica GN=P0533E11.34-1 PE=2 SV=1	57426	34.1	8.96	-0.0004	15599	97.68	SPFEQEVATAGEAQSSIQK
Q6K7K6	Glutelin OS=Oryza sativa subsp. japonica GN=P0533E11.34-1 PE=2 SV=1	57426	34.1	8.96	-0.0002	15600	50.75	SPFEQEVATAGEAQSSIQK
Q6K7K6	Glutelin OS=Oryza sativa subsp. japonica GN=P0533E11.34-1 PE=2 SV=1	57426	34.1	8.96	0.0001	15601	47.34	SPFEQEVATAGEAQSSIQK
Q6K7K6	Glutelin OS=Oryza sativa subsp. japonica GN=P0533E11.34-1 PE=2 SV=1	57426	34.1	8.96	0.0003	15602	76.5	SPFEQEVATAGEAQSSIQK
Q6K7K6	Glutelin OS=Oryza sativa subsp. japonica GN=P0533E11.34-1 PE=2 SV=1	57426	34.1	8.96	0.0008	15603	74.74	SPFEQEVATAGEAQSSIQK
Q6K7K6	Glutelin OS=Oryza sativa subsp. japonica GN=P0533E11.34-1 PE=2 SV=1	57426	34.1	8.96	0.0013	15604	88.65	SPFEQEVATAGEAQSSIQK
Q6K7K6	Glutelin OS=Oryza sativa subsp. japonica GN=P0533E11.34-1 PE=2 SV=1	57426	34.1	8.96	-0.0015	15853	81.72	SSWQQQSYSYQTEQLSR
Q6K7K6	Glutelin OS=Oryza sativa subsp. japonica GN=P0533E11.34-1 PE=2 SV=1	57426	34.1	8.96	-0.0006	15854	93.61	SSWQQQSYSYQTEQLSR
Q6K7K6	Glutelin OS=Oryza sativa subsp. japonica GN=P0533E11.34-1 PE=2 SV=1	57426	34.1	8.96	-0.0001	15855	66.97	SSWQQQSYSYQTEQLSR
Q6K7K6	Glutelin OS=Oryza sativa subsp. japonica GN=P0533E11.34-1 PE=2 SV=1	57426	34.1	8.96	0.0009	15856	90.17	SSWQQQSYSYQTEQLSR
Q6K7K6	Glutelin OS=Oryza sativa subsp. japonica GN=P0533E11.34-1 PE=2 SV=1	57426	34.1	8.96	0.0012	15857	93.47	SSWQQQSYSYQTEQLSR
Q6K7K6	Glutelin OS=Oryza sativa subsp. japonica GN=P0533E11.34-1 PE=2 SV=1	57426	34.1	8.96	0.0019	15858	92.77	SSWQQQSYSYQTEQLSR
Q6K7K6	Glutelin OS=Oryza sativa subsp. japonica GN=P0533E11.34-1 PE=2 SV=1	57426	34.1	8.96	0.0002	16156	96.41	NQNIFAGFSPDLLSEALSVSK
Q0DDE3	Soluble starch synthase 2-3, chloroplastic/amyloplastic OS=Oryza sativa subsp. japonica GN=SSII-3 PE=1 SV=1	88719	23.6	5.28	-0.0005	1086	33.69	VMVVVPR
Q0DDE3	Soluble starch synthase 2-3, chloroplastic/amyloplastic OS=Oryza sativa subsp. japonica GN=SSII-3 PE=1 SV=1	88719	23.6	5.28	-0.0005	1087	46.26	VMVVVPR
Q0DDE3	Soluble starch synthase 2-3, chloroplastic/amyloplastic OS=Oryza sativa subsp. japonica GN=SSII-3 PE=1 SV=1	88719	23.6	5.28	-0.0003	1088	53.22	VMVVVPR
Q0DDE3	Soluble starch synthase 2-3, chloroplastic/amyloplastic OS=Oryza sativa subsp. japonica GN=SSII-3 PE=1 SV=1	88719	23.6	5.28	0	1089	39.6	VMVVVPR
Q0DDE3	Soluble starch synthase 2-3, chloroplastic/amyloplastic OS=Oryza sativa subsp. japonica GN=SSII-3 PE=1 SV=1	88719	23.6	5.28	-0.001	1374	28.57	ELGLEVR
Q0DDE3	Soluble starch synthase 2-3, chloroplastic/amyloplastic OS=Oryza sativa subsp. japonica GN=SSII-3 PE=1 SV=1	88719	23.6	5.28	-0.0002	3366	29.25	RGTVPPVGR
Q0DDE3	Soluble starch synthase 2-3, chloroplastic/amyloplastic OS=Oryza sativa subsp. japonica GN=SSII-3 PE=1 SV=1	88719	23.6	5.28	0	9699	65.47	ADDGENEAAVER
Q0DDE3	Soluble starch synthase 2-3, chloroplastic/amyloplastic OS=Oryza sativa subsp. japonica GN=SSII-3 PE=1 SV=1	88719	23.6	5.28	0.0014	9700	71.84	ADDGENEAAVER
Q0DDE3	Soluble starch synthase 2-3, chloroplastic/amyloplastic OS=Oryza sativa subsp. japonica GN=SSII-3 PE=1 SV=1	88719	23.6	5.28	0.0018	9701	38.72	ADDGENEAAVER
Q0DDE3	Soluble starch synthase 2-3, chloroplastic/amyloplastic OS=Oryza sativa subsp. japonica GN=SSII-3 PE=1 SV=1	88719	23.6	5.28	0.0005	10784	78.21	ITAGADVLVMPSR
Q0DDE3	Soluble starch synthase 2-3, chloroplastic/amyloplastic OS=Oryza sativa subsp. japonica GN=SSII-3 PE=1 SV=1	88719	23.6	5.28	0.0025	10785	92.17	ITAGADVLVMPSR
Q0DDE3	Soluble starch synthase 2-3, chloroplastic/amyloplastic OS=Oryza sativa subsp. japonica GN=SSII-3 PE=1 SV=1	88719	23.6	5.28	-0.0001	12477	92.43	YGDYAEAQDVGIR
Q0DDE3	Soluble starch synthase 2-3, chloroplastic/amyloplastic OS=Oryza sativa subsp. japonica GN=SSII-3 PE=1 SV=1	88719	23.6	5.28	0.0003	12478	98.31	YGDYAEAQDVGIR
Q0DDE3	Soluble starch synthase 2-3, chloroplastic/amyloplastic OS=Oryza sativa subsp. japonica GN=SSII-3 PE=1 SV=1	88719	23.6	5.28	0.0004	12479	101.57	YGDYAEAQDVGIR
Q0DDE3	Soluble starch synthase 2-3, chloroplastic/amyloplastic OS=Oryza sativa subsp. japonica GN=SSII-3 PE=1 SV=1	88719	23.6	5.28	0.0033	12480	79.14	YGDYAEAQDVGIR
Q0DDE3	Soluble starch synthase 2-3, chloroplastic/amyloplastic OS=Oryza sativa subsp. japonica GN=SSII-3 PE=1 SV=1	88719	23.6	5.28	-0.0004	12917	51.76	GAAAPAPAPTQDAASSK
Q0DDE3	Soluble starch synthase 2-3, chloroplastic/amyloplastic OS=Oryza sativa subsp. japonica GN=SSII-3 PE=1 SV=1	88719	23.6	5.28	-0.0004	12918	62.84	GAAAPAPAPTQDAASSK
Q0DDE3	Soluble starch synthase 2-3, chloroplastic/amyloplastic OS=Oryza sativa subsp. japonica GN=SSII-3 PE=1 SV=1	88719	23.6	5.28	-0.0003	12919	50.41	GAAAPAPAPTQDAASSK
Q0DDE3	Soluble starch synthase 2-3, chloroplastic/amyloplastic OS=Oryza sativa subsp. japonica GN=SSII-3 PE=1 SV=1	88719	23.6	5.28	-0.0001	12920	51.9	GAAAPAPAPTQDAASSK
Q0DDE3	Soluble starch synthase 2-3, chloroplastic/amyloplastic OS=Oryza sativa subsp. japonica GN=SSII-3 PE=1 SV=1	88719	23.6	5.28	0	12921	44.98	GAAAPAPAPTQDAASSK
Q0DDE3	Soluble starch synthase 2-3, chloroplastic/amyloplastic OS=Oryza sativa subsp. japonica GN=SSII-3 PE=1 SV=1	88719	23.6	5.28	0	12922	41.18	GAAAPAPAPTQDAASSK
Q0DDE3	Soluble starch synthase 2-3, chloroplastic/amyloplastic OS=Oryza sativa subsp. japonica GN=SSII-3 PE=1 SV=1	88719	23.6	5.28	0	12923	47.51	GAAAPAPAPTQDAASSK
Q0DDE3	Soluble starch synthase 2-3, chloroplastic/amyloplastic OS=Oryza sativa subsp. japonica GN=SSII-3 PE=1 SV=1	88719	23.6	5.28	0	12924	59.36	GAAAPAPAPTQDAASSK
Q0DDE3	Soluble starch synthase 2-3, chloroplastic/amyloplastic OS=Oryza sativa subsp. japonica GN=SSII-3 PE=1 SV=1	88719	23.6	5.28	0.0001	12925	36.02	GAAAPAPAPTQDAASSK
Q0DDE3	Soluble starch synthase 2-3, chloroplastic/amyloplastic OS=Oryza sativa subsp. japonica GN=SSII-3 PE=1 SV=1	88719	23.6	5.28	0.0001	12926	71.68	GAAAPAPAPTQDAASSK
Q0DDE3	Soluble starch synthase 2-3, chloroplastic/amyloplastic OS=Oryza sativa subsp. japonica GN=SSII-3 PE=1 SV=1	88719	23.6	5.28	0.0014	12927	51.64	GAAAPAPAPTQDAASSK
Q0DDE3	Soluble starch synthase 2-3, chloroplastic/amyloplastic OS=Oryza sativa subsp. japonica GN=SSII-3 PE=1 SV=1	88719	23.6	5.28	-0.0005	14600	38.51	SSPIPAVEEETWDFK
Q0DDE3	Soluble starch synthase 2-3, chloroplastic/amyloplastic OS=Oryza sativa subsp. japonica GN=SSII-3 PE=1 SV=1	88719	23.6	5.28	-0.0002	15185	43.62	SSAPLPKPDNSEFAEDK
Q0DDE3	Soluble starch synthase 2-3, chloroplastic/amyloplastic OS=Oryza sativa subsp. japonica GN=SSII-3 PE=1 SV=1	88719	23.6	5.28	0.0019	15186	77.72	SSAPLPKPDNSEFAEDK
Q0DDE3	Soluble starch synthase 2-3, chloroplastic/amyloplastic OS=Oryza sativa subsp. japonica GN=SSII-3 PE=1 SV=1	88719	23.6	5.28	-0.0048	15264	73.33	SSPIPAVEEETWDFKK
Q0DDE3	Soluble starch synthase 2-3, chloroplastic/amyloplastic OS=Oryza sativa subsp. japonica GN=SSII-3 PE=1 SV=1	88719	23.6	5.28	-0.0033	15265	32.61	SSPIPAVEEETWDFKK
Q0DDE3	Soluble starch synthase 2-3, chloroplastic/amyloplastic OS=Oryza sativa subsp. japonica GN=SSII-3 PE=1 SV=1	88719	23.6	5.28	-0.0019	15809	24.86	NGSVVTGADKPAAATPPVTITK
Q0DDE3	Soluble starch synthase 2-3, chloroplastic/amyloplastic OS=Oryza sativa subsp. japonica GN=SSII-3 PE=1 SV=1	88719	23.6	5.28	-0.0011	15810	46.35	NGSVVTGADKPAAATPPVTITK
Q0DDE3	Soluble starch synthase 2-3, chloroplastic/amyloplastic OS=Oryza sativa subsp. japonica GN=SSII-3 PE=1 SV=1	88719	23.6	5.28	-0.0041	16183	104.6	AGEDDDEEEEFSSGAWQPPR
Q0DDE3	Soluble starch synthase 2-3, chloroplastic/amyloplastic OS=Oryza sativa subsp. japonica GN=SSII-3 PE=1 SV=1	88719	23.6	5.28	-0.0018	16184	24.41	AGEDDDEEEEFSSGAWQPPR
Q0DDE3	Soluble starch synthase 2-3, chloroplastic/amyloplastic OS=Oryza sativa subsp. japonica GN=SSII-3 PE=1 SV=1	88719	23.6	5.28	-0.001	16185	117.07	AGEDDDEEEEFSSGAWQPPR
Q0DDE3	Soluble starch synthase 2-3, chloroplastic/amyloplastic OS=Oryza sativa subsp. japonica GN=SSII-3 PE=1 SV=1	88719	23.6	5.28	-0.0007	16186	103.11	AGEDDDEEEEFSSGAWQPPR
Q0DDE3	Soluble starch synthase 2-3, chloroplastic/amyloplastic OS=Oryza sativa subsp. japonica GN=SSII-3 PE=1 SV=1	88719	23.6	5.28	0.0002	16187	63.23	AGEDDDEEEEFSSGAWQPPR
Q0DDE3	Soluble starch synthase 2-3, chloroplastic/amyloplastic OS=Oryza sativa subsp. japonica GN=SSII-3 PE=1 SV=1	88719	23.6	5.28	0.0008	16188	154.95	AGEDDDEEEEFSSGAWQPPR
Q0DDE3	Soluble starch synthase 2-3, chloroplastic/amyloplastic OS=Oryza sativa subsp. japonica GN=SSII-3 PE=1 SV=1	88719	23.6	5.28	0.0042	16189	22.66	AGEDDDEEEEFSSGAWQPPR
Q0DDE3	Soluble starch synthase 2-3, chloroplastic/amyloplastic OS=Oryza sativa subsp. japonica GN=SSII-3 PE=1 SV=1	88719	23.6	5.28	-0.0005	16718	67.83	LPAPDSPVILPSVDKPQPEFVIPDATAPAPPPPGSNPR
Q0DDE3	Soluble starch synthase 2-3, chloroplastic/amyloplastic OS=Oryza sativa subsp. japonica GN=SSII-3 PE=1 SV=1	88719	23.6	5.28	0.0021	16719	34.63	LPAPDSPVILPSVDKPQPEFVIPDATAPAPPPPGSNPR
Q6H6P8	Branching enzyme-3 OS=Oryza sativa subsp. japonica GN=P0475F05.16 PE=4 SV=1	92983	21.2	5.69	-0.0004	23	27.34	YSLYR
Q6H6P8	Branching enzyme-3 OS=Oryza sativa subsp. japonica GN=P0475F05.16 PE=4 SV=1	92983	21.2	5.69	-0.0004	24	25.9	YSLYR
Q6H6P8	Branching enzyme-3 OS=Oryza sativa subsp. japonica GN=P0475F05.16 PE=4 SV=1	92983	21.2	5.69	-0.0004	25	26.98	YSLYR
Q6H6P8	Branching enzyme-3 OS=Oryza sativa subsp. japonica GN=P0475F05.16 PE=4 SV=1	92983	21.2	5.69	-0.0003	26	37.29	YSLYR
Q6H6P8	Branching enzyme-3 OS=Oryza sativa subsp. japonica GN=P0475F05.16 PE=4 SV=1	92983	21.2	5.69	-0.0002	27	33.43	YSLYR
Q6H6P8	Branching enzyme-3 OS=Oryza sativa subsp. japonica GN=P0475F05.16 PE=4 SV=1	92983	21.2	5.69	-0.0002	28	21.33	YSLYR
Q6H6P8	Branching enzyme-3 OS=Oryza sativa subsp. japonica GN=P0475F05.16 PE=4 SV=1	92983	21.2	5.69	-0.0001	29	43.12	YSLYR
Q6H6P8	Branching enzyme-3 OS=Oryza sativa subsp. japonica GN=P0475F05.16 PE=4 SV=1	92983	21.2	5.69	-0.0001	30	43.04	YSLYR
Q6H6P8	Branching enzyme-3 OS=Oryza sativa subsp. japonica GN=P0475F05.16 PE=4 SV=1	92983	21.2	5.69	-0.0001	31	35.46	YSLYR
Q6H6P8	Branching enzyme-3 OS=Oryza sativa subsp. japonica GN=P0475F05.16 PE=4 SV=1	92983	21.2	5.69	-0.0001	32	26.8	YSLYR
Q6H6P8	Branching enzyme-3 OS=Oryza sativa subsp. japonica GN=P0475F05.16 PE=4 SV=1	92983	21.2	5.69	-0.0001	33	27.47	YSLYR
Q6H6P8	Branching enzyme-3 OS=Oryza sativa subsp. japonica GN=P0475F05.16 PE=4 SV=1	92983	21.2	5.69	-0.0001	34	43.05	YSLYR
Q6H6P8	Branching enzyme-3 OS=Oryza sativa subsp. japonica GN=P0475F05.16 PE=4 SV=1	92983	21.2	5.69	-0.0001	35	37.06	YSLYR
Q6H6P8	Branching enzyme-3 OS=Oryza sativa subsp. japonica GN=P0475F05.16 PE=4 SV=1	92983	21.2	5.69	0	36	26.25	YSLYR
Q6H6P8	Branching enzyme-3 OS=Oryza sativa subsp. japonica GN=P0475F05.16 PE=4 SV=1	92983	21.2	5.69	0.0001	37	33.05	YSLYR
Q6H6P8	Branching enzyme-3 OS=Oryza sativa subsp. japonica GN=P0475F05.16 PE=4 SV=1	92983	21.2	5.69	0.0001	38	37.06	YSLYR
Q6H6P8	Branching enzyme-3 OS=Oryza sativa subsp. japonica GN=P0475F05.16 PE=4 SV=1	92983	21.2	5.69	0.0002	39	42.48	YSLYR
Q6H6P8	Branching enzyme-3 OS=Oryza sativa subsp. japonica GN=P0475F05.16 PE=4 SV=1	92983	21.2	5.69	0.0002	40	27.42	YSLYR
Q6H6P8	Branching enzyme-3 OS=Oryza sativa subsp. japonica GN=P0475F05.16 PE=4 SV=1	92983	21.2	5.69	0.0002	41	27.4	YSLYR
Q6H6P8	Branching enzyme-3 OS=Oryza sativa subsp. japonica GN=P0475F05.16 PE=4 SV=1	92983	21.2	5.69	0.0003	42	30.21	YSLYR
Q6H6P8	Branching enzyme-3 OS=Oryza sativa subsp. japonica GN=P0475F05.16 PE=4 SV=1	92983	21.2	5.69	0.0004	43	23.89	YSLYR
Q6H6P8	Branching enzyme-3 OS=Oryza sativa subsp. japonica GN=P0475F05.16 PE=4 SV=1	92983	21.2	5.69	0.0005	44	27.32	YSLYR
Q6H6P8	Branching enzyme-3 OS=Oryza sativa subsp. japonica GN=P0475F05.16 PE=4 SV=1	92983	21.2	5.69	0.0005	45	36.96	YSLYR
Q6H6P8	Branching enzyme-3 OS=Oryza sativa subsp. japonica GN=P0475F05.16 PE=4 SV=1	92983	21.2	5.69	0.0007	46	22.44	YSLYR
Q6H6P8	Branching enzyme-3 OS=Oryza sativa subsp. japonica GN=P0475F05.16 PE=4 SV=1	92983	21.2	5.69	0	278	27.82	DEVLPR
Q6H6P8	Branching enzyme-3 OS=Oryza sativa subsp. japonica GN=P0475F05.16 PE=4 SV=1	92983	21.2	5.69	0.0002	280	24.7	DEVLPR
Q6H6P8	Branching enzyme-3 OS=Oryza sativa subsp. japonica GN=P0475F05.16 PE=4 SV=1	92983	21.2	5.69	-0.001	820	27.33	MIIFEK
Q6H6P8	Branching enzyme-3 OS=Oryza sativa subsp. japonica GN=P0475F05.16 PE=4 SV=1	92983	21.2	5.69	-0.0009	1511	20.2	FLLSNAR
Q6H6P8	Branching enzyme-3 OS=Oryza sativa subsp. japonica GN=P0475F05.16 PE=4 SV=1	92983	21.2	5.69	-0.0001	2216	46.43	VGCLKPGK
Q6H6P8	Branching enzyme-3 OS=Oryza sativa subsp. japonica GN=P0475F05.16 PE=4 SV=1	92983	21.2	5.69	0	2299	41.83	METPSGIK
Q6H6P8	Branching enzyme-3 OS=Oryza sativa subsp. japonica GN=P0475F05.16 PE=4 SV=1	92983	21.2	5.69	0.0003	2300	29.57	METPSGIK
Q6H6P8	Branching enzyme-3 OS=Oryza sativa subsp. japonica GN=P0475F05.16 PE=4 SV=1	92983	21.2	5.69	-0.0005	2368	33.15	GMLEFDR
Q6H6P8	Branching enzyme-3 OS=Oryza sativa subsp. japonica GN=P0475F05.16 PE=4 SV=1	92983	21.2	5.69	0	2605	22.46	QSDESWK
Q6H6P8	Branching enzyme-3 OS=Oryza sativa subsp. japonica GN=P0475F05.16 PE=4 SV=1	92983	21.2	5.69	-0.0012	2896	20.3	FGTPEDLK
Q6H6P8	Branching enzyme-3 OS=Oryza sativa subsp. japonica GN=P0475F05.16 PE=4 SV=1	92983	21.2	5.69	-0.0005	2897	21.26	FGTPEDLK
Q6H6P8	Branching enzyme-3 OS=Oryza sativa subsp. japonica GN=P0475F05.16 PE=4 SV=1	92983	21.2	5.69	-0.0003	2898	24.41	FGTPEDLK
Q6H6P8	Branching enzyme-3 OS=Oryza sativa subsp. japonica GN=P0475F05.16 PE=4 SV=1	92983	21.2	5.69	-0.0001	2899	42.72	FGTPEDLK
Q6H6P8	Branching enzyme-3 OS=Oryza sativa subsp. japonica GN=P0475F05.16 PE=4 SV=1	92983	21.2	5.69	-0.0001	2900	24.02	FGTPEDLK
Q6H6P8	Branching enzyme-3 OS=Oryza sativa subsp. japonica GN=P0475F05.16 PE=4 SV=1	92983	21.2	5.69	-0.0001	2902	28.41	FGTPEDLK
Q6H6P8	Branching enzyme-3 OS=Oryza sativa subsp. japonica GN=P0475F05.16 PE=4 SV=1	92983	21.2	5.69	-0.0001	2903	27.1	FGTPEDLK
Q6H6P8	Branching enzyme-3 OS=Oryza sativa subsp. japonica GN=P0475F05.16 PE=4 SV=1	92983	21.2	5.69	-0.0001	2904	21.61	FGTPEDLK
Q6H6P8	Branching enzyme-3 OS=Oryza sativa subsp. japonica GN=P0475F05.16 PE=4 SV=1	92983	21.2	5.69	-0.0001	2905	31.84	FGTPEDLK
Q6H6P8	Branching enzyme-3 OS=Oryza sativa subsp. japonica GN=P0475F05.16 PE=4 SV=1	92983	21.2	5.69	0	2906	36.09	FGTPEDLK
Q6H6P8	Branching enzyme-3 OS=Oryza sativa subsp. japonica GN=P0475F05.16 PE=4 SV=1	92983	21.2	5.69	0.0001	2907	49.22	FGTPEDLK
Q6H6P8	Branching enzyme-3 OS=Oryza sativa subsp. japonica GN=P0475F05.16 PE=4 SV=1	92983	21.2	5.69	0.0001	2908	38.8	FGTPEDLK
Q6H6P8	Branching enzyme-3 OS=Oryza sativa subsp. japonica GN=P0475F05.16 PE=4 SV=1	92983	21.2	5.69	0.0001	2909	41.94	FGTPEDLK
Q6H6P8	Branching enzyme-3 OS=Oryza sativa subsp. japonica GN=P0475F05.16 PE=4 SV=1	92983	21.2	5.69	0.0002	2910	28.57	FGTPEDLK
Q6H6P8	Branching enzyme-3 OS=Oryza sativa subsp. japonica GN=P0475F05.16 PE=4 SV=1	92983	21.2	5.69	-0.0002	3277	25.22	AMQSLEEK
Q6H6P8	Branching enzyme-3 OS=Oryza sativa subsp. japonica GN=P0475F05.16 PE=4 SV=1	92983	21.2	5.69	0.0003	3278	33.85	AMQSLEEK
Q6H6P8	Branching enzyme-3 OS=Oryza sativa subsp. japonica GN=P0475F05.16 PE=4 SV=1	92983	21.2	5.69	-0.0004	4494	21.08	VVPPTGDGQK
Q6H6P8	Branching enzyme-3 OS=Oryza sativa subsp. japonica GN=P0475F05.16 PE=4 SV=1	92983	21.2	5.69	-0.0001	4496	24.07	VVPPTGDGQK
Q6H6P8	Branching enzyme-3 OS=Oryza sativa subsp. japonica GN=P0475F05.16 PE=4 SV=1	92983	21.2	5.69	-0.0001	4497	38.36	VVPPTGDGQK
Q6H6P8	Branching enzyme-3 OS=Oryza sativa subsp. japonica GN=P0475F05.16 PE=4 SV=1	92983	21.2	5.69	-0.0001	4498	33.81	VVPPTGDGQK
Q6H6P8	Branching enzyme-3 OS=Oryza sativa subsp. japonica GN=P0475F05.16 PE=4 SV=1	92983	21.2	5.69	0.0001	4501	33	VVPPTGDGQK
Q6H6P8	Branching enzyme-3 OS=Oryza sativa subsp. japonica GN=P0475F05.16 PE=4 SV=1	92983	21.2	5.69	0.0001	4525	63.14	INTYANFR
Q6H6P8	Branching enzyme-3 OS=Oryza sativa subsp. japonica GN=P0475F05.16 PE=4 SV=1	92983	21.2	5.69	0.0002	4526	58.25	INTYANFR
Q6H6P8	Branching enzyme-3 OS=Oryza sativa subsp. japonica GN=P0475F05.16 PE=4 SV=1	92983	21.2	5.69	0.0003	4527	47.36	INTYANFR
Q6H6P8	Branching enzyme-3 OS=Oryza sativa subsp. japonica GN=P0475F05.16 PE=4 SV=1	92983	21.2	5.69	0.0005	4528	37.34	INTYANFR
Q6H6P8	Branching enzyme-3 OS=Oryza sativa subsp. japonica GN=P0475F05.16 PE=4 SV=1	92983	21.2	5.69	-0.0002	4784	25.62	TCVVYAPAE
Q6H6P8	Branching enzyme-3 OS=Oryza sativa subsp. japonica GN=P0475F05.16 PE=4 SV=1	92983	21.2	5.69	-0.0001	8150	69.92	FDLGDADYLR
Q6H6P8	Branching enzyme-3 OS=Oryza sativa subsp. japonica GN=P0475F05.16 PE=4 SV=1	92983	21.2	5.69	0.0001	9572	56.62	FIPGNNNSYDK
Q6H6P8	Branching enzyme-3 OS=Oryza sativa subsp. japonica GN=P0475F05.16 PE=4 SV=1	92983	21.2	5.69	0.0001	9573	53.52	FIPGNNNSYDK
Q6H6P8	Branching enzyme-3 OS=Oryza sativa subsp. japonica GN=P0475F05.16 PE=4 SV=1	92983	21.2	5.69	0.0002	9574	59.75	FIPGNNNSYDK
Q6H6P8	Branching enzyme-3 OS=Oryza sativa subsp. japonica GN=P0475F05.16 PE=4 SV=1	92983	21.2	5.69	0.0003	9575	26.46	FIPGNNNSYDK
Q6H6P8	Branching enzyme-3 OS=Oryza sativa subsp. japonica GN=P0475F05.16 PE=4 SV=1	92983	21.2	5.69	0.0004	9576	65.97	FIPGNNNSYDK
Q6H6P8	Branching enzyme-3 OS=Oryza sativa subsp. japonica GN=P0475F05.16 PE=4 SV=1	92983	21.2	5.69	0.0004	9577	59.57	FIPGNNNSYDK
Q6H6P8	Branching enzyme-3 OS=Oryza sativa subsp. japonica GN=P0475F05.16 PE=4 SV=1	92983	21.2	5.69	0.0004	9578	33.32	FIPGNNNSYDK
Q6H6P8	Branching enzyme-3 OS=Oryza sativa subsp. japonica GN=P0475F05.16 PE=4 SV=1	92983	21.2	5.69	-0.0007	11437	45.98	VVEELAAEQKPR
Q6H6P8	Branching enzyme-3 OS=Oryza sativa subsp. japonica GN=P0475F05.16 PE=4 SV=1	92983	21.2	5.69	-0.0004	11439	42.01	VVEELAAEQKPR
Q6H6P8	Branching enzyme-3 OS=Oryza sativa subsp. japonica GN=P0475F05.16 PE=4 SV=1	92983	21.2	5.69	-0.0003	11440	69.56	VVEELAAEQKPR
Q6H6P8	Branching enzyme-3 OS=Oryza sativa subsp. japonica GN=P0475F05.16 PE=4 SV=1	92983	21.2	5.69	0	11441	80.59	VVEELAAEQKPR
Q6H6P8	Branching enzyme-3 OS=Oryza sativa subsp. japonica GN=P0475F05.16 PE=4 SV=1	92983	21.2	5.69	0	11442	30.56	VVEELAAEQKPR
Q6H6P8	Branching enzyme-3 OS=Oryza sativa subsp. japonica GN=P0475F05.16 PE=4 SV=1	92983	21.2	5.69	0.0017	11444	53.45	VVEELAAEQKPR
Q6H6P8	Branching enzyme-3 OS=Oryza sativa subsp. japonica GN=P0475F05.16 PE=4 SV=1	92983	21.2	5.69	0.0011	13540	29.35	IYETHVGMSSTEPK
Q6H6P8	Branching enzyme-3 OS=Oryza sativa subsp. japonica GN=P0475F05.16 PE=4 SV=1	92983	21.2	5.69	-0.0023	13692	40.85	IYETHVGMSSTEPK
Q6H6P8	Branching enzyme-3 OS=Oryza sativa subsp. japonica GN=P0475F05.16 PE=4 SV=1	92983	21.2	5.69	0.0001	13696	21.92	IYETHVGMSSTEPK
Q6H6P8	Branching enzyme-3 OS=Oryza sativa subsp. japonica GN=P0475F05.16 PE=4 SV=1	92983	21.2	5.69	-0.0042	14421	109.4	SDIDQYEGGLETFSR
Q6H6P8	Branching enzyme-3 OS=Oryza sativa subsp. japonica GN=P0475F05.16 PE=4 SV=1	92983	21.2	5.69	-0.0004	14422	37.38	SDIDQYEGGLETFSR
Q6H6P8	Branching enzyme-3 OS=Oryza sativa subsp. japonica GN=P0475F05.16 PE=4 SV=1	92983	21.2	5.69	-0.0003	14423	87.17	SDIDQYEGGLETFSR
Q6H6P8	Branching enzyme-3 OS=Oryza sativa subsp. japonica GN=P0475F05.16 PE=4 SV=1	92983	21.2	5.69	0.0026	14424	77.15	SDIDQYEGGLETFSR
Q6H6P8	Branching enzyme-3 OS=Oryza sativa subsp. japonica GN=P0475F05.16 PE=4 SV=1	92983	21.2	5.69	0.001	15022	51.07	CVTYAESHDQALVGDK
Q6H6P8	Branching enzyme-3 OS=Oryza sativa subsp. japonica GN=P0475F05.16 PE=4 SV=1	92983	21.2	5.69	0.0047	15023	55.92	CVTYAESHDQALVGDK
Q852L2	Cupin family protein, expressed OS=Oryza sativa subsp. japonica GN=OSJNBb0060J21.10 PE=2 SV=2	52436	35.5	6.78	-0.0004	459	39.11	FSVLER
Q852L2	Cupin family protein, expressed OS=Oryza sativa subsp. japonica GN=OSJNBb0060J21.10 PE=2 SV=2	52436	35.5	6.78	-0.0002	460	45.62	FSVLER
Q852L2	Cupin family protein, expressed OS=Oryza sativa subsp. japonica GN=OSJNBb0060J21.10 PE=2 SV=2	52436	35.5	6.78	0.0001	461	38.83	FSVLER
Q852L2	Cupin family protein, expressed OS=Oryza sativa subsp. japonica GN=OSJNBb0060J21.10 PE=2 SV=2	52436	35.5	6.78	-0.0004	1052	46.1	ESFCVR
Q852L2	Cupin family protein, expressed OS=Oryza sativa subsp. japonica GN=OSJNBb0060J21.10 PE=2 SV=2	52436	35.5	6.78	-0.0002	1053	40.21	ESFCVR
Q852L2	Cupin family protein, expressed OS=Oryza sativa subsp. japonica GN=OSJNBb0060J21.10 PE=2 SV=2	52436	35.5	6.78	-0.0002	1054	26.66	ESFCVR
Q852L2	Cupin family protein, expressed OS=Oryza sativa subsp. japonica GN=OSJNBb0060J21.10 PE=2 SV=2	52436	35.5	6.78	0	1056	32.31	ESFCVR
Q852L2	Cupin family protein, expressed OS=Oryza sativa subsp. japonica GN=OSJNBb0060J21.10 PE=2 SV=2	52436	35.5	6.78	0.0001	1058	41.71	ESFCVR
Q852L2	Cupin family protein, expressed OS=Oryza sativa subsp. japonica GN=OSJNBb0060J21.10 PE=2 SV=2	52436	35.5	6.78	0.0001	1060	45.73	ESFCVR
Q852L2	Cupin family protein, expressed OS=Oryza sativa subsp. japonica GN=OSJNBb0060J21.10 PE=2 SV=2	52436	35.5	6.78	0.0002	1061	41.64	ESFCVR
Q852L2	Cupin family protein, expressed OS=Oryza sativa subsp. japonica GN=OSJNBb0060J21.10 PE=2 SV=2	52436	35.5	6.78	0.0005	1062	45.06	ESFCVR
Q852L2	Cupin family protein, expressed OS=Oryza sativa subsp. japonica GN=OSJNBb0060J21.10 PE=2 SV=2	52436	35.5	6.78	0.0005	1063	28.47	ESFCVR
Q852L2	Cupin family protein, expressed OS=Oryza sativa subsp. japonica GN=OSJNBb0060J21.10 PE=2 SV=2	52436	35.5	6.78	0.0006	1064	41.1	ESFCVR
Q852L2	Cupin family protein, expressed OS=Oryza sativa subsp. japonica GN=OSJNBb0060J21.10 PE=2 SV=2	52436	35.5	6.78	0.0011	1065	24.23	ESFCVR
Q852L2	Cupin family protein, expressed OS=Oryza sativa subsp. japonica GN=OSJNBb0060J21.10 PE=2 SV=2	52436	35.5	6.78	0.0012	1066	44.5	ESFCVR
Q852L2	Cupin family protein, expressed OS=Oryza sativa subsp. japonica GN=OSJNBb0060J21.10 PE=2 SV=2	52436	35.5	6.78	-0.0003	2554	28.04	LVFGGSAAR
Q852L2	Cupin family protein, expressed OS=Oryza sativa subsp. japonica GN=OSJNBb0060J21.10 PE=2 SV=2	52436	35.5	6.78	-0.0001	2562	30.77	LVFGGSAAR
Q852L2	Cupin family protein, expressed OS=Oryza sativa subsp. japonica GN=OSJNBb0060J21.10 PE=2 SV=2	52436	35.5	6.78	0	2572	29.84	LVFGGSAAR
Q852L2	Cupin family protein, expressed OS=Oryza sativa subsp. japonica GN=OSJNBb0060J21.10 PE=2 SV=2	52436	35.5	6.78	0.0001	2577	30.54	LVFGGSAAR
Q852L2	Cupin family protein, expressed OS=Oryza sativa subsp. japonica GN=OSJNBb0060J21.10 PE=2 SV=2	52436	35.5	6.78	0.0001	2578	30.48	LVFGGSAAR
Q852L2	Cupin family protein, expressed OS=Oryza sativa subsp. japonica GN=OSJNBb0060J21.10 PE=2 SV=2	52436	35.5	6.78	0	3162	58.1	VAVLEAAPR
Q852L2	Cupin family protein, expressed OS=Oryza sativa subsp. japonica GN=OSJNBb0060J21.10 PE=2 SV=2	52436	35.5	6.78	0	3163	47.5	VAVLEAAPR
Q852L2	Cupin family protein, expressed OS=Oryza sativa subsp. japonica GN=OSJNBb0060J21.10 PE=2 SV=2	52436	35.5	6.78	0	3164	47.84	VAVLEAAPR
Q852L2	Cupin family protein, expressed OS=Oryza sativa subsp. japonica GN=OSJNBb0060J21.10 PE=2 SV=2	52436	35.5	6.78	0.0002	3165	33.72	VAVLEAAPR
Q852L2	Cupin family protein, expressed OS=Oryza sativa subsp. japonica GN=OSJNBb0060J21.10 PE=2 SV=2	52436	35.5	6.78	0.0002	3166	28.04	VAVLEAAPR
Q852L2	Cupin family protein, expressed OS=Oryza sativa subsp. japonica GN=OSJNBb0060J21.10 PE=2 SV=2	52436	35.5	6.78	0.0002	3167	46.15	VAVLEAAPR
Q852L2	Cupin family protein, expressed OS=Oryza sativa subsp. japonica GN=OSJNBb0060J21.10 PE=2 SV=2	52436	35.5	6.78	-0.0003	7524	41.66	SPYFSNNHGK
Q852L2	Cupin family protein, expressed OS=Oryza sativa subsp. japonica GN=OSJNBb0060J21.10 PE=2 SV=2	52436	35.5	6.78	-0.0003	7525	37.9	SPYFSNNHGK
Q852L2	Cupin family protein, expressed OS=Oryza sativa subsp. japonica GN=OSJNBb0060J21.10 PE=2 SV=2	52436	35.5	6.78	0.0009	8753	34.76	GSMIAPNYNTR
Q852L2	Cupin family protein, expressed OS=Oryza sativa subsp. japonica GN=OSJNBb0060J21.10 PE=2 SV=2	52436	35.5	6.78	0.0012	8754	22.28	GSMIAPNYNTR
Q852L2	Cupin family protein, expressed OS=Oryza sativa subsp. japonica GN=OSJNBb0060J21.10 PE=2 SV=2	52436	35.5	6.78	0.0017	8755	32.9	GSMIAPNYNTR
Q852L2	Cupin family protein, expressed OS=Oryza sativa subsp. japonica GN=OSJNBb0060J21.10 PE=2 SV=2	52436	35.5	6.78	-0.0018	8988	51.27	LFELTGDECR
Q852L2	Cupin family protein, expressed OS=Oryza sativa subsp. japonica GN=OSJNBb0060J21.10 PE=2 SV=2	52436	35.5	6.78	0	8989	74.83	LFELTGDECR
Q852L2	Cupin family protein, expressed OS=Oryza sativa subsp. japonica GN=OSJNBb0060J21.10 PE=2 SV=2	52436	35.5	6.78	0.0002	9023	20.89	GSMIAPNYNTR
Q852L2	Cupin family protein, expressed OS=Oryza sativa subsp. japonica GN=OSJNBb0060J21.10 PE=2 SV=2	52436	35.5	6.78	0.0004	9025	27.56	GSMIAPNYNTR
Q852L2	Cupin family protein, expressed OS=Oryza sativa subsp. japonica GN=OSJNBb0060J21.10 PE=2 SV=2	52436	35.5	6.78	-0.002	11128	45.38	VLAAQPEQILLR
Q852L2	Cupin family protein, expressed OS=Oryza sativa subsp. japonica GN=OSJNBb0060J21.10 PE=2 SV=2	52436	35.5	6.78	-0.0013	12490	85.34	EEEQGEEEHGER
Q852L2	Cupin family protein, expressed OS=Oryza sativa subsp. japonica GN=OSJNBb0060J21.10 PE=2 SV=2	52436	35.5	6.78	-0.0007	12491	30.16	EEEQGEEEHGER
Q852L2	Cupin family protein, expressed OS=Oryza sativa subsp. japonica GN=OSJNBb0060J21.10 PE=2 SV=2	52436	35.5	6.78	-0.0022	13064	43.17	EGGEITTAPEEQIR
Q852L2	Cupin family protein, expressed OS=Oryza sativa subsp. japonica GN=OSJNBb0060J21.10 PE=2 SV=2	52436	35.5	6.78	-0.0012	13065	46.86	EGGEITTAPEEQIR
Q852L2	Cupin family protein, expressed OS=Oryza sativa subsp. japonica GN=OSJNBb0060J21.10 PE=2 SV=2	52436	35.5	6.78	-0.0003	13066	49.88	EGGEITTAPEEQIR
Q852L2	Cupin family protein, expressed OS=Oryza sativa subsp. japonica GN=OSJNBb0060J21.10 PE=2 SV=2	52436	35.5	6.78	-0.0003	13067	35.9	EGGEITTAPEEQIR
Q852L2	Cupin family protein, expressed OS=Oryza sativa subsp. japonica GN=OSJNBb0060J21.10 PE=2 SV=2	52436	35.5	6.78	-0.0003	13068	44.44	EGGEITTAPEEQIR
Q852L2	Cupin family protein, expressed OS=Oryza sativa subsp. japonica GN=OSJNBb0060J21.10 PE=2 SV=2	52436	35.5	6.78	-0.0002	13069	53.77	EGGEITTAPEEQIR
Q852L2	Cupin family protein, expressed OS=Oryza sativa subsp. japonica GN=OSJNBb0060J21.10 PE=2 SV=2	52436	35.5	6.78	-0.0002	13070	49.02	EGGEITTAPEEQIR
Q852L2	Cupin family protein, expressed OS=Oryza sativa subsp. japonica GN=OSJNBb0060J21.10 PE=2 SV=2	52436	35.5	6.78	0.0001	13071	39.65	EGGEITTAPEEQIR
Q852L2	Cupin family protein, expressed OS=Oryza sativa subsp. japonica GN=OSJNBb0060J21.10 PE=2 SV=2	52436	35.5	6.78	0.0001	13072	46.75	EGGEITTAPEEQIR
Q852L2	Cupin family protein, expressed OS=Oryza sativa subsp. japonica GN=OSJNBb0060J21.10 PE=2 SV=2	52436	35.5	6.78	-0.001	13354	82.27	FPDEQVVGAAVGGYR
Q852L2	Cupin family protein, expressed OS=Oryza sativa subsp. japonica GN=OSJNBb0060J21.10 PE=2 SV=2	52436	35.5	6.78	-0.0001	13355	82.14	FPDEQVVGAAVGGYR
Q852L2	Cupin family protein, expressed OS=Oryza sativa subsp. japonica GN=OSJNBb0060J21.10 PE=2 SV=2	52436	35.5	6.78	-0.0001	13356	34.27	FPDEQVVGAAVGGYR
Q852L2	Cupin family protein, expressed OS=Oryza sativa subsp. japonica GN=OSJNBb0060J21.10 PE=2 SV=2	52436	35.5	6.78	0	13357	70.21	FPDEQVVGAAVGGYR
Q852L2	Cupin family protein, expressed OS=Oryza sativa subsp. japonica GN=OSJNBb0060J21.10 PE=2 SV=2	52436	35.5	6.78	-0.001	14877	47.01	EEEQGEEEHGERGEK
Q852L2	Cupin family protein, expressed OS=Oryza sativa subsp. japonica GN=OSJNBb0060J21.10 PE=2 SV=2	52436	35.5	6.78	-0.0001	14878	38.05	EEEQGEEEHGERGEK
Q852L2	Cupin family protein, expressed OS=Oryza sativa subsp. japonica GN=OSJNBb0060J21.10 PE=2 SV=2	52436	35.5	6.78	-0.0029	15113	63.54	QREGGEITTAPEEQIR
Q852L2	Cupin family protein, expressed OS=Oryza sativa subsp. japonica GN=OSJNBb0060J21.10 PE=2 SV=2	52436	35.5	6.78	0.0026	15114	20.69	QREGGEITTAPEEQIR
Q852L2	Cupin family protein, expressed OS=Oryza sativa subsp. japonica GN=OSJNBb0060J21.10 PE=2 SV=2	52436	35.5	6.78	-0.0025	15344	78.81	GGGGGSGSEWEIKPSSLTGK
Q852L2	Cupin family protein, expressed OS=Oryza sativa subsp. japonica GN=OSJNBb0060J21.10 PE=2 SV=2	52436	35.5	6.78	0	15345	49.07	GGGGGSGSEWEIKPSSLTGK
Q852L2	Cupin family protein, expressed OS=Oryza sativa subsp. japonica GN=OSJNBb0060J21.10 PE=2 SV=2	52436	35.5	6.78	0.0002	16118	49.86	EGDAMVIPAGAIVYSANTHSSK
Q852L2	Cupin family protein, expressed OS=Oryza sativa subsp. japonica GN=OSJNBb0060J21.10 PE=2 SV=2	52436	35.5	6.78	-0.0036	16151	39.83	EGDAMVIPAGAIVYSANTHSSK
Q6AVA8	Pyruvate, phosphate dikinase 1, chloroplastic OS=Oryza sativa subsp. japonica GN=PPDK1 PE=1 SV=1	103578	20.2	5.98	-0.0014	1067	33.93	VFTDMGK
Q6AVA8	Pyruvate, phosphate dikinase 1, chloroplastic OS=Oryza sativa subsp. japonica GN=PPDK1 PE=1 SV=1	103578	20.2	5.98	0.001	1068	53.63	VFTDMGK
Q6AVA8	Pyruvate, phosphate dikinase 1, chloroplastic OS=Oryza sativa subsp. japonica GN=PPDK1 PE=1 SV=1	103578	20.2	5.98	0.0001	1358	36.8	VFTDMGK
Q6AVA8	Pyruvate, phosphate dikinase 1, chloroplastic OS=Oryza sativa subsp. japonica GN=PPDK1 PE=1 SV=1	103578	20.2	5.98	-0.0002	1378	34.99	IVVIEDK
Q6AVA8	Pyruvate, phosphate dikinase 1, chloroplastic OS=Oryza sativa subsp. japonica GN=PPDK1 PE=1 SV=1	103578	20.2	5.98	0.0006	1379	35.69	IVVIEDK
Q6AVA8	Pyruvate, phosphate dikinase 1, chloroplastic OS=Oryza sativa subsp. japonica GN=PPDK1 PE=1 SV=1	103578	20.2	5.98	-0.0005	1534	27.94	DVYVEAK
Q6AVA8	Pyruvate, phosphate dikinase 1, chloroplastic OS=Oryza sativa subsp. japonica GN=PPDK1 PE=1 SV=1	103578	20.2	5.98	0.0002	1535	20.3	DVYVEAK
Q6AVA8	Pyruvate, phosphate dikinase 1, chloroplastic OS=Oryza sativa subsp. japonica GN=PPDK1 PE=1 SV=1	103578	20.2	5.98	0.0004	1536	24.85	DVYVEAK
Q6AVA8	Pyruvate, phosphate dikinase 1, chloroplastic OS=Oryza sativa subsp. japonica GN=PPDK1 PE=1 SV=1	103578	20.2	5.98	-0.0001	3996	22.93	GEPFPSDPK
Q6AVA8	Pyruvate, phosphate dikinase 1, chloroplastic OS=Oryza sativa subsp. japonica GN=PPDK1 PE=1 SV=1	103578	20.2	5.98	0.0003	4901	39.5	VGTMIEIPR
Q6AVA8	Pyruvate, phosphate dikinase 1, chloroplastic OS=Oryza sativa subsp. japonica GN=PPDK1 PE=1 SV=1	103578	20.2	5.98	-0.0007	5700	22.95	TPEDLDAMR
Q6AVA8	Pyruvate, phosphate dikinase 1, chloroplastic OS=Oryza sativa subsp. japonica GN=PPDK1 PE=1 SV=1	103578	20.2	5.98	-0.0029	9755	52.71	QMIMASSLELR
Q6AVA8	Pyruvate, phosphate dikinase 1, chloroplastic OS=Oryza sativa subsp. japonica GN=PPDK1 PE=1 SV=1	103578	20.2	5.98	0.0001	12361	54.09	IAVDMVNEGLVER
Q6AVA8	Pyruvate, phosphate dikinase 1, chloroplastic OS=Oryza sativa subsp. japonica GN=PPDK1 PE=1 SV=1	103578	20.2	5.98	0.0005	12522	47.47	IAVDMVNEGLVER
Q6AVA8	Pyruvate, phosphate dikinase 1, chloroplastic OS=Oryza sativa subsp. japonica GN=PPDK1 PE=1 SV=1	103578	20.2	5.98	0.0033	12523	32.29	IAVDMVNEGLVER
Q6AVA8	Pyruvate, phosphate dikinase 1, chloroplastic OS=Oryza sativa subsp. japonica GN=PPDK1 PE=1 SV=1	103578	20.2	5.98	-0.0047	12939	39.38	GLHNDTDLTATDLK
Q6AVA8	Pyruvate, phosphate dikinase 1, chloroplastic OS=Oryza sativa subsp. japonica GN=PPDK1 PE=1 SV=1	103578	20.2	5.98	-0.0024	12940	64.05	GLHNDTDLTATDLK
Q6AVA8	Pyruvate, phosphate dikinase 1, chloroplastic OS=Oryza sativa subsp. japonica GN=PPDK1 PE=1 SV=1	103578	20.2	5.98	-0.0027	13308	81.28	VMANADTPEDATTAR
Q6AVA8	Pyruvate, phosphate dikinase 1, chloroplastic OS=Oryza sativa subsp. japonica GN=PPDK1 PE=1 SV=1	103578	20.2	5.98	-0.0017	13309	62.79	VMANADTPEDATTAR
Q6AVA8	Pyruvate, phosphate dikinase 1, chloroplastic OS=Oryza sativa subsp. japonica GN=PPDK1 PE=1 SV=1	103578	20.2	5.98	-0.0014	13310	87.98	VMANADTPEDATTAR
Q6AVA8	Pyruvate, phosphate dikinase 1, chloroplastic OS=Oryza sativa subsp. japonica GN=PPDK1 PE=1 SV=1	103578	20.2	5.98	-0.0006	13312	68.8	VMANADTPEDATTAR
Q6AVA8	Pyruvate, phosphate dikinase 1, chloroplastic OS=Oryza sativa subsp. japonica GN=PPDK1 PE=1 SV=1	103578	20.2	5.98	-0.0006	13313	93.26	VMANADTPEDATTAR
Q6AVA8	Pyruvate, phosphate dikinase 1, chloroplastic OS=Oryza sativa subsp. japonica GN=PPDK1 PE=1 SV=1	103578	20.2	5.98	-0.0005	13314	80.93	VMANADTPEDATTAR
Q6AVA8	Pyruvate, phosphate dikinase 1, chloroplastic OS=Oryza sativa subsp. japonica GN=PPDK1 PE=1 SV=1	103578	20.2	5.98	-0.0005	13315	98.08	VMANADTPEDATTAR
Q6AVA8	Pyruvate, phosphate dikinase 1, chloroplastic OS=Oryza sativa subsp. japonica GN=PPDK1 PE=1 SV=1	103578	20.2	5.98	-0.0004	13316	72.67	VMANADTPEDATTAR
Q6AVA8	Pyruvate, phosphate dikinase 1, chloroplastic OS=Oryza sativa subsp. japonica GN=PPDK1 PE=1 SV=1	103578	20.2	5.98	-0.0003	13317	51.81	VMANADTPEDATTAR
Q6AVA8	Pyruvate, phosphate dikinase 1, chloroplastic OS=Oryza sativa subsp. japonica GN=PPDK1 PE=1 SV=1	103578	20.2	5.98	-0.0002	13318	87.3	VMANADTPEDATTAR
Q6AVA8	Pyruvate, phosphate dikinase 1, chloroplastic OS=Oryza sativa subsp. japonica GN=PPDK1 PE=1 SV=1	103578	20.2	5.98	0	13319	80.03	VMANADTPEDATTAR
Q6AVA8	Pyruvate, phosphate dikinase 1, chloroplastic OS=Oryza sativa subsp. japonica GN=PPDK1 PE=1 SV=1	103578	20.2	5.98	0.0001	13320	71.77	VMANADTPEDATTAR
Q6AVA8	Pyruvate, phosphate dikinase 1, chloroplastic OS=Oryza sativa subsp. japonica GN=PPDK1 PE=1 SV=1	103578	20.2	5.98	0.0001	13321	75.21	VMANADTPEDATTAR
Q6AVA8	Pyruvate, phosphate dikinase 1, chloroplastic OS=Oryza sativa subsp. japonica GN=PPDK1 PE=1 SV=1	103578	20.2	5.98	0.0001	13322	80.3	VMANADTPEDATTAR
Q6AVA8	Pyruvate, phosphate dikinase 1, chloroplastic OS=Oryza sativa subsp. japonica GN=PPDK1 PE=1 SV=1	103578	20.2	5.98	0.0002	13323	72.87	VMANADTPEDATTAR
Q6AVA8	Pyruvate, phosphate dikinase 1, chloroplastic OS=Oryza sativa subsp. japonica GN=PPDK1 PE=1 SV=1	103578	20.2	5.98	0.0002	13324	84.26	VMANADTPEDATTAR
Q6AVA8	Pyruvate, phosphate dikinase 1, chloroplastic OS=Oryza sativa subsp. japonica GN=PPDK1 PE=1 SV=1	103578	20.2	5.98	0.0005	13325	78.11	VMANADTPEDATTAR
Q6AVA8	Pyruvate, phosphate dikinase 1, chloroplastic OS=Oryza sativa subsp. japonica GN=PPDK1 PE=1 SV=1	103578	20.2	5.98	0.0006	13326	81.49	VMANADTPEDATTAR
Q6AVA8	Pyruvate, phosphate dikinase 1, chloroplastic OS=Oryza sativa subsp. japonica GN=PPDK1 PE=1 SV=1	103578	20.2	5.98	0.002	13327	70.68	VMANADTPEDATTAR
Q6AVA8	Pyruvate, phosphate dikinase 1, chloroplastic OS=Oryza sativa subsp. japonica GN=PPDK1 PE=1 SV=1	103578	20.2	5.98	-0.0007	13535	37.52	VMANADTPEDATTAR
Q6AVA8	Pyruvate, phosphate dikinase 1, chloroplastic OS=Oryza sativa subsp. japonica GN=PPDK1 PE=1 SV=1	103578	20.2	5.98	-0.0002	13536	31.32	VMANADTPEDATTAR
Q6AVA8	Pyruvate, phosphate dikinase 1, chloroplastic OS=Oryza sativa subsp. japonica GN=PPDK1 PE=1 SV=1	103578	20.2	5.98	-0.0001	13537	59.34	VMANADTPEDATTAR
Q6AVA8	Pyruvate, phosphate dikinase 1, chloroplastic OS=Oryza sativa subsp. japonica GN=PPDK1 PE=1 SV=1	103578	20.2	5.98	0.0003	13538	67.06	VMANADTPEDATTAR
Q6AVA8	Pyruvate, phosphate dikinase 1, chloroplastic OS=Oryza sativa subsp. japonica GN=PPDK1 PE=1 SV=1	103578	20.2	5.98	0.0007	13539	61.47	VMANADTPEDATTAR
Q6AVA8	Pyruvate, phosphate dikinase 1, chloroplastic OS=Oryza sativa subsp. japonica GN=PPDK1 PE=1 SV=1	103578	20.2	5.98	0.0021	13784	55.43	LGISYPELTEMQAR
Q6AVA8	Pyruvate, phosphate dikinase 1, chloroplastic OS=Oryza sativa subsp. japonica GN=PPDK1 PE=1 SV=1	103578	20.2	5.98	-0.0018	14586	111.07	ELCSETGAAQDDVLAR
Q6AVA8	Pyruvate, phosphate dikinase 1, chloroplastic OS=Oryza sativa subsp. japonica GN=PPDK1 PE=1 SV=1	103578	20.2	5.98	-0.0011	14587	123.56	ELCSETGAAQDDVLAR
Q6AVA8	Pyruvate, phosphate dikinase 1, chloroplastic OS=Oryza sativa subsp. japonica GN=PPDK1 PE=1 SV=1	103578	20.2	5.98	-0.0007	14588	93.99	ELCSETGAAQDDVLAR
Q6AVA8	Pyruvate, phosphate dikinase 1, chloroplastic OS=Oryza sativa subsp. japonica GN=PPDK1 PE=1 SV=1	103578	20.2	5.98	0	14589	128.57	ELCSETGAAQDDVLAR
Q6AVA8	Pyruvate, phosphate dikinase 1, chloroplastic OS=Oryza sativa subsp. japonica GN=PPDK1 PE=1 SV=1	103578	20.2	5.98	0.0008	14590	107.78	ELCSETGAAQDDVLAR
Q6AVA8	Pyruvate, phosphate dikinase 1, chloroplastic OS=Oryza sativa subsp. japonica GN=PPDK1 PE=1 SV=1	103578	20.2	5.98	0.0022	14591	65.99	ELCSETGAAQDDVLAR
Q6AVA8	Pyruvate, phosphate dikinase 1, chloroplastic OS=Oryza sativa subsp. japonica GN=PPDK1 PE=1 SV=1	103578	20.2	5.98	-0.0071	15898	53.7	TETSPEDVGGMHAAVGILTAR
Q0E261	Glutelin OS=Oryza sativa subsp. japonica GN=Os02g0268300 PE=2 SV=1	57239	34.2	9	-0.001	2992	40.08	EQQMYGR
Q0E261	Glutelin OS=Oryza sativa subsp. japonica GN=Os02g0268300 PE=2 SV=1	57239	34.2	9	-0.0004	2993	27.35	EQQMYGR
Q0E261	Glutelin OS=Oryza sativa subsp. japonica GN=Os02g0268300 PE=2 SV=1	57239	34.2	9	0.0001	2994	27.76	EQQMYGR
Q0E261	Glutelin OS=Oryza sativa subsp. japonica GN=Os02g0268300 PE=2 SV=1	57239	34.2	9	0.0001	2995	27.84	EQQMYGR
Q0E261	Glutelin OS=Oryza sativa subsp. japonica GN=Os02g0268300 PE=2 SV=1	57239	34.2	9	0.0001	2996	28.38	EQQMYGR
Q0E261	Glutelin OS=Oryza sativa subsp. japonica GN=Os02g0268300 PE=2 SV=1	57239	34.2	9	0.0003	2997	26.71	EQQMYGR
Q0E261	Glutelin OS=Oryza sativa subsp. japonica GN=Os02g0268300 PE=2 SV=1	57239	34.2	9	0.0004	2998	21.66	EQQMYGR
Q0E261	Glutelin OS=Oryza sativa subsp. japonica GN=Os02g0268300 PE=2 SV=1	57239	34.2	9	0.0006	2999	20.42	EQQMYGR
Q0E261	Glutelin OS=Oryza sativa subsp. japonica GN=Os02g0268300 PE=2 SV=1	57239	34.2	9	-0.0009	3402	25.28	VQVVSNLGK
Q0E261	Glutelin OS=Oryza sativa subsp. japonica GN=Os02g0268300 PE=2 SV=1	57239	34.2	9	-0.0004	3408	30.12	VQVVSNLGK
Q0E261	Glutelin OS=Oryza sativa subsp. japonica GN=Os02g0268300 PE=2 SV=1	57239	34.2	9	-0.0003	3409	20.26	VQVVSNLGK
Q0E261	Glutelin OS=Oryza sativa subsp. japonica GN=Os02g0268300 PE=2 SV=1	57239	34.2	9	-0.0002	3412	25.86	VQVVSNLGK
Q0E261	Glutelin OS=Oryza sativa subsp. japonica GN=Os02g0268300 PE=2 SV=1	57239	34.2	9	-0.0001	3413	46.69	VQVVSNLGK
Q0E261	Glutelin OS=Oryza sativa subsp. japonica GN=Os02g0268300 PE=2 SV=1	57239	34.2	9	-0.0001	3414	40.65	VQVVSNLGK
Q0E261	Glutelin OS=Oryza sativa subsp. japonica GN=Os02g0268300 PE=2 SV=1	57239	34.2	9	0	3415	39.88	VQVVSNLGK
Q0E261	Glutelin OS=Oryza sativa subsp. japonica GN=Os02g0268300 PE=2 SV=1	57239	34.2	9	0	3416	35.99	VQVVSNLGK
Q0E261	Glutelin OS=Oryza sativa subsp. japonica GN=Os02g0268300 PE=2 SV=1	57239	34.2	9	0	3417	35.7	VQVVSNLGK
Q0E261	Glutelin OS=Oryza sativa subsp. japonica GN=Os02g0268300 PE=2 SV=1	57239	34.2	9	0	3418	29.92	VQVVSNLGK
Q0E261	Glutelin OS=Oryza sativa subsp. japonica GN=Os02g0268300 PE=2 SV=1	57239	34.2	9	0	3419	34.66	VQVVSNLGK
Q0E261	Glutelin OS=Oryza sativa subsp. japonica GN=Os02g0268300 PE=2 SV=1	57239	34.2	9	0	3420	51.07	VQVVSNLGK
Q0E261	Glutelin OS=Oryza sativa subsp. japonica GN=Os02g0268300 PE=2 SV=1	57239	34.2	9	0.0001	3423	40.54	VQVVSNLGK
Q0E261	Glutelin OS=Oryza sativa subsp. japonica GN=Os02g0268300 PE=2 SV=1	57239	34.2	9	0.0001	3424	50.45	VQVVSNLGK
Q0E261	Glutelin OS=Oryza sativa subsp. japonica GN=Os02g0268300 PE=2 SV=1	57239	34.2	9	0.0001	3426	61.11	VQVVSNLGK
Q0E261	Glutelin OS=Oryza sativa subsp. japonica GN=Os02g0268300 PE=2 SV=1	57239	34.2	9	0.0001	3427	63.21	VQVVSNLGK
Q0E261	Glutelin OS=Oryza sativa subsp. japonica GN=Os02g0268300 PE=2 SV=1	57239	34.2	9	0.0001	3428	53.14	VQVVSNLGK
Q0E261	Glutelin OS=Oryza sativa subsp. japonica GN=Os02g0268300 PE=2 SV=1	57239	34.2	9	0.0001	3429	39.51	VQVVSNLGK
Q0E261	Glutelin OS=Oryza sativa subsp. japonica GN=Os02g0268300 PE=2 SV=1	57239	34.2	9	0.0001	3430	30.15	VQVVSNLGK
Q0E261	Glutelin OS=Oryza sativa subsp. japonica GN=Os02g0268300 PE=2 SV=1	57239	34.2	9	0.0001	3431	30.34	VQVVSNLGK
Q0E261	Glutelin OS=Oryza sativa subsp. japonica GN=Os02g0268300 PE=2 SV=1	57239	34.2	9	0.0001	3432	35.21	VQVVSNLGK
Q0E261	Glutelin OS=Oryza sativa subsp. japonica GN=Os02g0268300 PE=2 SV=1	57239	34.2	9	0.0001	3433	52.09	VQVVSNLGK
Q0E261	Glutelin OS=Oryza sativa subsp. japonica GN=Os02g0268300 PE=2 SV=1	57239	34.2	9	0.0001	3434	47.18	VQVVSNLGK
Q0E261	Glutelin OS=Oryza sativa subsp. japonica GN=Os02g0268300 PE=2 SV=1	57239	34.2	9	0.0001	3435	53.7	VQVVSNLGK
Q0E261	Glutelin OS=Oryza sativa subsp. japonica GN=Os02g0268300 PE=2 SV=1	57239	34.2	9	0.0001	3436	44.25	VQVVSNLGK
Q0E261	Glutelin OS=Oryza sativa subsp. japonica GN=Os02g0268300 PE=2 SV=1	57239	34.2	9	0.0001	3437	47.88	VQVVSNLGK
Q0E261	Glutelin OS=Oryza sativa subsp. japonica GN=Os02g0268300 PE=2 SV=1	57239	34.2	9	0.0002	3438	24.75	VQVVSNLGK
Q0E261	Glutelin OS=Oryza sativa subsp. japonica GN=Os02g0268300 PE=2 SV=1	57239	34.2	9	0.0002	3439	27.2	VQVVSNLGK
Q0E261	Glutelin OS=Oryza sativa subsp. japonica GN=Os02g0268300 PE=2 SV=1	57239	34.2	9	0.0002	3440	35.3	VQVVSNLGK
Q0E261	Glutelin OS=Oryza sativa subsp. japonica GN=Os02g0268300 PE=2 SV=1	57239	34.2	9	0.0002	3441	41.59	VQVVSNLGK
Q0E261	Glutelin OS=Oryza sativa subsp. japonica GN=Os02g0268300 PE=2 SV=1	57239	34.2	9	0.0002	3442	37.52	VQVVSNLGK
Q0E261	Glutelin OS=Oryza sativa subsp. japonica GN=Os02g0268300 PE=2 SV=1	57239	34.2	9	0.0002	3443	39.96	VQVVSNLGK
Q0E261	Glutelin OS=Oryza sativa subsp. japonica GN=Os02g0268300 PE=2 SV=1	57239	34.2	9	0.0002	3444	60.74	VQVVSNLGK
Q0E261	Glutelin OS=Oryza sativa subsp. japonica GN=Os02g0268300 PE=2 SV=1	57239	34.2	9	0.0002	3445	38.61	VQVVSNLGK
Q0E261	Glutelin OS=Oryza sativa subsp. japonica GN=Os02g0268300 PE=2 SV=1	57239	34.2	9	0.0003	3446	40.59	VQVVSNLGK
Q0E261	Glutelin OS=Oryza sativa subsp. japonica GN=Os02g0268300 PE=2 SV=1	57239	34.2	9	0.0003	3447	35.24	VQVVSNLGK
Q0E261	Glutelin OS=Oryza sativa subsp. japonica GN=Os02g0268300 PE=2 SV=1	57239	34.2	9	0.0003	3448	31.47	VQVVSNLGK
Q0E261	Glutelin OS=Oryza sativa subsp. japonica GN=Os02g0268300 PE=2 SV=1	57239	34.2	9	0.0003	3449	39.89	VQVVSNLGK
Q0E261	Glutelin OS=Oryza sativa subsp. japonica GN=Os02g0268300 PE=2 SV=1	57239	34.2	9	0.0003	3450	34.45	VQVVSNLGK
Q0E261	Glutelin OS=Oryza sativa subsp. japonica GN=Os02g0268300 PE=2 SV=1	57239	34.2	9	0.0003	3451	34.28	VQVVSNLGK
Q0E261	Glutelin OS=Oryza sativa subsp. japonica GN=Os02g0268300 PE=2 SV=1	57239	34.2	9	0.0004	3453	53.17	VQVVSNLGK
Q0E261	Glutelin OS=Oryza sativa subsp. japonica GN=Os02g0268300 PE=2 SV=1	57239	34.2	9	0.0004	3454	49.5	VQVVSNLGK
Q0E261	Glutelin OS=Oryza sativa subsp. japonica GN=Os02g0268300 PE=2 SV=1	57239	34.2	9	0.0005	3455	42.61	VQVVSNLGK
Q0E261	Glutelin OS=Oryza sativa subsp. japonica GN=Os02g0268300 PE=2 SV=1	57239	34.2	9	0.0005	3456	33.66	VQVVSNLGK
Q0E261	Glutelin OS=Oryza sativa subsp. japonica GN=Os02g0268300 PE=2 SV=1	57239	34.2	9	0.0006	3457	29.36	VQVVSNLGK
Q0E261	Glutelin OS=Oryza sativa subsp. japonica GN=Os02g0268300 PE=2 SV=1	57239	34.2	9	0.0006	3458	44.68	VQVVSNLGK
Q0E261	Glutelin OS=Oryza sativa subsp. japonica GN=Os02g0268300 PE=2 SV=1	57239	34.2	9	0.0006	3459	39.86	VQVVSNLGK
Q0E261	Glutelin OS=Oryza sativa subsp. japonica GN=Os02g0268300 PE=2 SV=1	57239	34.2	9	0.0006	3460	35.5	VQVVSNLGK
Q0E261	Glutelin OS=Oryza sativa subsp. japonica GN=Os02g0268300 PE=2 SV=1	57239	34.2	9	0.0006	3461	34.35	VQVVSNLGK
Q0E261	Glutelin OS=Oryza sativa subsp. japonica GN=Os02g0268300 PE=2 SV=1	57239	34.2	9	0.0006	3462	23.23	VQVVSNLGK
Q0E261	Glutelin OS=Oryza sativa subsp. japonica GN=Os02g0268300 PE=2 SV=1	57239	34.2	9	0.0006	3463	41.44	VQVVSNLGK
Q0E261	Glutelin OS=Oryza sativa subsp. japonica GN=Os02g0268300 PE=2 SV=1	57239	34.2	9	0.0007	3464	21.22	VQVVSNLGK
Q0E261	Glutelin OS=Oryza sativa subsp. japonica GN=Os02g0268300 PE=2 SV=1	57239	34.2	9	0.0004	5856	30.24	GEELGAFTPR
Q0E261	Glutelin OS=Oryza sativa subsp. japonica GN=Os02g0268300 PE=2 SV=1	57239	34.2	9	0.0004	5857	28.91	GEELGAFTPR
Q0E261	Glutelin OS=Oryza sativa subsp. japonica GN=Os02g0268300 PE=2 SV=1	57239	34.2	9	0.0004	5858	47.76	GEELGAFTPR
Q0E261	Glutelin OS=Oryza sativa subsp. japonica GN=Os02g0268300 PE=2 SV=1	57239	34.2	9	-0.0013	10772	46.43	TNANSMVSHLAGK
Q0E261	Glutelin OS=Oryza sativa subsp. japonica GN=Os02g0268300 PE=2 SV=1	57239	34.2	9	-0.0002	10773	49.47	TNANSMVSHLAGK
Q0E261	Glutelin OS=Oryza sativa subsp. japonica GN=Os02g0268300 PE=2 SV=1	57239	34.2	9	-0.0001	11027	75.44	TNANSMVSHLAGK
Q0E261	Glutelin OS=Oryza sativa subsp. japonica GN=Os02g0268300 PE=2 SV=1	57239	34.2	9	-0.0017	12519	36.57	NNRGEELGAFTPR
Q0E261	Glutelin OS=Oryza sativa subsp. japonica GN=Os02g0268300 PE=2 SV=1	57239	34.2	9	-0.0043	12589	55.77	AEHEGCQYISFK
Q0E261	Glutelin OS=Oryza sativa subsp. japonica GN=Os02g0268300 PE=2 SV=1	57239	34.2	9	-0.0025	12590	39.83	AEHEGCQYISFK
Q0E261	Glutelin OS=Oryza sativa subsp. japonica GN=Os02g0268300 PE=2 SV=1	57239	34.2	9	-0.0006	13729	39.52	YSNTPGMVYIIQGR
Q0E261	Glutelin OS=Oryza sativa subsp. japonica GN=Os02g0268300 PE=2 SV=1	57239	34.2	9	-0.0004	13730	72.63	YSNTPGMVYIIQGR
Q0E261	Glutelin OS=Oryza sativa subsp. japonica GN=Os02g0268300 PE=2 SV=1	57239	34.2	9	-0.0004	13731	24.95	YSNTPGMVYIIQGR
Q0E261	Glutelin OS=Oryza sativa subsp. japonica GN=Os02g0268300 PE=2 SV=1	57239	34.2	9	0.0003	13732	58.45	YSNTPGMVYIIQGR
Q0E261	Glutelin OS=Oryza sativa subsp. japonica GN=Os02g0268300 PE=2 SV=1	57239	34.2	9	-0.0007	13733	55.61	NEQFQCTGTFVIR
Q0E261	Glutelin OS=Oryza sativa subsp. japonica GN=Os02g0268300 PE=2 SV=1	57239	34.2	9	-0.0007	13834	88.7	YSNTPGMVYIIQGR
Q0E261	Glutelin OS=Oryza sativa subsp. japonica GN=Os02g0268300 PE=2 SV=1	57239	34.2	9	0	13835	68.98	YSNTPGMVYIIQGR
Q0E261	Glutelin OS=Oryza sativa subsp. japonica GN=Os02g0268300 PE=2 SV=1	57239	34.2	9	0.0008	13836	90.36	YSNTPGMVYIIQGR
Q0E261	Glutelin OS=Oryza sativa subsp. japonica GN=Os02g0268300 PE=2 SV=1	57239	34.2	9	0.0011	13837	57.81	YSNTPGMVYIIQGR
Q0E261	Glutelin OS=Oryza sativa subsp. japonica GN=Os02g0268300 PE=2 SV=1	57239	34.2	9	-0.0022	14648	64.47	LNIENPSHADTYNPR
Q0E261	Glutelin OS=Oryza sativa subsp. japonica GN=Os02g0268300 PE=2 SV=1	57239	34.2	9	-0.0001	14650	60.36	LNIENPSHADTYNPR
Q0E261	Glutelin OS=Oryza sativa subsp. japonica GN=Os02g0268300 PE=2 SV=1	57239	34.2	9	0.0033	14655	29.53	LNIENPSHADTYNPR
Q0E261	Glutelin OS=Oryza sativa subsp. japonica GN=Os02g0268300 PE=2 SV=1	57239	34.2	9	-0.001	16669	31.19	GSMGLTFPGCPATYQQQFQQFLPEGQSQSQK
Q0E261	Glutelin OS=Oryza sativa subsp. japonica GN=Os02g0268300 PE=2 SV=1	57239	34.2	9	0.0053	16670	86.55	GSMGLTFPGCPATYQQQFQQFLPEGQSQSQK
Q0E261	Glutelin OS=Oryza sativa subsp. japonica GN=Os02g0268300 PE=2 SV=1	57239	34.2	9	0.013	16674	37.23	GSMGLTFPGCPATYQQQFQQFLPEGQSQSQK
Q7X834	OSJNBa0019G23.2 protein OS=Oryza sativa subsp. japonica GN=OSJNBa0019G23.2 PE=4 SV=2	107032	19.5	5.82	0.002	1036	20.77	AYWVTR
Q7X834	OSJNBa0019G23.2 protein OS=Oryza sativa subsp. japonica GN=OSJNBa0019G23.2 PE=4 SV=2	107032	19.5	5.82	0.0015	2380	54.44	YSSPLFR
Q7X834	OSJNBa0019G23.2 protein OS=Oryza sativa subsp. japonica GN=OSJNBa0019G23.2 PE=4 SV=2	107032	19.5	5.82	-0.0015	3727	54.78	QMVQALNR
Q7X834	OSJNBa0019G23.2 protein OS=Oryza sativa subsp. japonica GN=OSJNBa0019G23.2 PE=4 SV=2	107032	19.5	5.82	-0.001	3728	32.84	QMVQALNR
Q7X834	OSJNBa0019G23.2 protein OS=Oryza sativa subsp. japonica GN=OSJNBa0019G23.2 PE=4 SV=2	107032	19.5	5.82	-0.0008	3730	25.02	QMVQALNR
Q7X834	OSJNBa0019G23.2 protein OS=Oryza sativa subsp. japonica GN=OSJNBa0019G23.2 PE=4 SV=2	107032	19.5	5.82	-0.0008	3731	20.62	QMVQALNR
Q7X834	OSJNBa0019G23.2 protein OS=Oryza sativa subsp. japonica GN=OSJNBa0019G23.2 PE=4 SV=2	107032	19.5	5.82	-0.0001	3735	40.37	QMVQALNR
Q7X834	OSJNBa0019G23.2 protein OS=Oryza sativa subsp. japonica GN=OSJNBa0019G23.2 PE=4 SV=2	107032	19.5	5.82	0	3736	24.59	QMVQALNR
Q7X834	OSJNBa0019G23.2 protein OS=Oryza sativa subsp. japonica GN=OSJNBa0019G23.2 PE=4 SV=2	107032	19.5	5.82	0.0001	3737	42.73	QMVQALNR
Q7X834	OSJNBa0019G23.2 protein OS=Oryza sativa subsp. japonica GN=OSJNBa0019G23.2 PE=4 SV=2	107032	19.5	5.82	0.0001	3738	28.12	QMVQALNR
Q7X834	OSJNBa0019G23.2 protein OS=Oryza sativa subsp. japonica GN=OSJNBa0019G23.2 PE=4 SV=2	107032	19.5	5.82	0.0002	3740	20.15	QMVQALNR
Q7X834	OSJNBa0019G23.2 protein OS=Oryza sativa subsp. japonica GN=OSJNBa0019G23.2 PE=4 SV=2	107032	19.5	5.82	0.0002	3741	44.03	QMVQALNR
Q7X834	OSJNBa0019G23.2 protein OS=Oryza sativa subsp. japonica GN=OSJNBa0019G23.2 PE=4 SV=2	107032	19.5	5.82	0.0004	3742	47.09	QMVQALNR
Q7X834	OSJNBa0019G23.2 protein OS=Oryza sativa subsp. japonica GN=OSJNBa0019G23.2 PE=4 SV=2	107032	19.5	5.82	0.0006	3743	31.37	QMVQALNR
Q7X834	OSJNBa0019G23.2 protein OS=Oryza sativa subsp. japonica GN=OSJNBa0019G23.2 PE=4 SV=2	107032	19.5	5.82	0.0007	3745	20.44	QMVQALNR
Q7X834	OSJNBa0019G23.2 protein OS=Oryza sativa subsp. japonica GN=OSJNBa0019G23.2 PE=4 SV=2	107032	19.5	5.82	0.0007	3746	23.28	QMVQALNR
Q7X834	OSJNBa0019G23.2 protein OS=Oryza sativa subsp. japonica GN=OSJNBa0019G23.2 PE=4 SV=2	107032	19.5	5.82	0.0007	3747	26.83	QMVQALNR
Q7X834	OSJNBa0019G23.2 protein OS=Oryza sativa subsp. japonica GN=OSJNBa0019G23.2 PE=4 SV=2	107032	19.5	5.82	0.0009	3748	28.79	QMVQALNR
Q7X834	OSJNBa0019G23.2 protein OS=Oryza sativa subsp. japonica GN=OSJNBa0019G23.2 PE=4 SV=2	107032	19.5	5.82	0.001	3749	25.46	QMVQALNR
Q7X834	OSJNBa0019G23.2 protein OS=Oryza sativa subsp. japonica GN=OSJNBa0019G23.2 PE=4 SV=2	107032	19.5	5.82	0.001	3750	25.45	QMVQALNR
Q7X834	OSJNBa0019G23.2 protein OS=Oryza sativa subsp. japonica GN=OSJNBa0019G23.2 PE=4 SV=2	107032	19.5	5.82	0.001	3751	34.28	QMVQALNR
Q7X834	OSJNBa0019G23.2 protein OS=Oryza sativa subsp. japonica GN=OSJNBa0019G23.2 PE=4 SV=2	107032	19.5	5.82	-0.0007	4172	44.75	IVPGYYLR
Q7X834	OSJNBa0019G23.2 protein OS=Oryza sativa subsp. japonica GN=OSJNBa0019G23.2 PE=4 SV=2	107032	19.5	5.82	0	4968	26.3	TTAVFVQPR
Q7X834	OSJNBa0019G23.2 protein OS=Oryza sativa subsp. japonica GN=OSJNBa0019G23.2 PE=4 SV=2	107032	19.5	5.82	0.0003	5002	20.34	FVDEAQLAK
Q7X834	OSJNBa0019G23.2 protein OS=Oryza sativa subsp. japonica GN=OSJNBa0019G23.2 PE=4 SV=2	107032	19.5	5.82	0.0003	5004	26.77	FVDEAQLAK
Q7X834	OSJNBa0019G23.2 protein OS=Oryza sativa subsp. japonica GN=OSJNBa0019G23.2 PE=4 SV=2	107032	19.5	5.82	0.0027	5012	23.1	FVDEAQLAK
Q7X834	OSJNBa0019G23.2 protein OS=Oryza sativa subsp. japonica GN=OSJNBa0019G23.2 PE=4 SV=2	107032	19.5	5.82	0.0003	5829	30.02	TPIGLSIDEK
Q7X834	OSJNBa0019G23.2 protein OS=Oryza sativa subsp. japonica GN=OSJNBa0019G23.2 PE=4 SV=2	107032	19.5	5.82	0.0002	5897	29.88	CLADDPYAR
Q7X834	OSJNBa0019G23.2 protein OS=Oryza sativa subsp. japonica GN=OSJNBa0019G23.2 PE=4 SV=2	107032	19.5	5.82	0.0007	5898	21.33	CLADDPYAR
Q7X834	OSJNBa0019G23.2 protein OS=Oryza sativa subsp. japonica GN=OSJNBa0019G23.2 PE=4 SV=2	107032	19.5	5.82	0.0008	5900	25.98	CLADDPYAR
Q7X834	OSJNBa0019G23.2 protein OS=Oryza sativa subsp. japonica GN=OSJNBa0019G23.2 PE=4 SV=2	107032	19.5	5.82	-0.0005	6779	84.92	LSTASDIEQR
Q7X834	OSJNBa0019G23.2 protein OS=Oryza sativa subsp. japonica GN=OSJNBa0019G23.2 PE=4 SV=2	107032	19.5	5.82	-0.0004	6780	29.52	LSTASDIEQR
Q7X834	OSJNBa0019G23.2 protein OS=Oryza sativa subsp. japonica GN=OSJNBa0019G23.2 PE=4 SV=2	107032	19.5	5.82	0.0001	6781	60.11	LSTASDIEQR
Q7X834	OSJNBa0019G23.2 protein OS=Oryza sativa subsp. japonica GN=OSJNBa0019G23.2 PE=4 SV=2	107032	19.5	5.82	0.0002	6782	30.33	LSTASDIEQR
Q7X834	OSJNBa0019G23.2 protein OS=Oryza sativa subsp. japonica GN=OSJNBa0019G23.2 PE=4 SV=2	107032	19.5	5.82	0.0002	6783	49.82	LSTASDIEQR
Q7X834	OSJNBa0019G23.2 protein OS=Oryza sativa subsp. japonica GN=OSJNBa0019G23.2 PE=4 SV=2	107032	19.5	5.82	0.0002	6784	32.32	LSTASDIEQR
Q7X834	OSJNBa0019G23.2 protein OS=Oryza sativa subsp. japonica GN=OSJNBa0019G23.2 PE=4 SV=2	107032	19.5	5.82	0.0004	6785	64.49	LSTASDIEQR
Q7X834	OSJNBa0019G23.2 protein OS=Oryza sativa subsp. japonica GN=OSJNBa0019G23.2 PE=4 SV=2	107032	19.5	5.82	0.0004	6786	63.96	LSTASDIEQR
Q7X834	OSJNBa0019G23.2 protein OS=Oryza sativa subsp. japonica GN=OSJNBa0019G23.2 PE=4 SV=2	107032	19.5	5.82	0.0004	6787	58.23	LSTASDIEQR
Q7X834	OSJNBa0019G23.2 protein OS=Oryza sativa subsp. japonica GN=OSJNBa0019G23.2 PE=4 SV=2	107032	19.5	5.82	0.0004	6788	87.12	LSTASDIEQR
Q7X834	OSJNBa0019G23.2 protein OS=Oryza sativa subsp. japonica GN=OSJNBa0019G23.2 PE=4 SV=2	107032	19.5	5.82	0.0006	6789	51.77	LSTASDIEQR
Q7X834	OSJNBa0019G23.2 protein OS=Oryza sativa subsp. japonica GN=OSJNBa0019G23.2 PE=4 SV=2	107032	19.5	5.82	-0.0004	8413	40.62	LENPSFRPLK
Q7X834	OSJNBa0019G23.2 protein OS=Oryza sativa subsp. japonica GN=OSJNBa0019G23.2 PE=4 SV=2	107032	19.5	5.82	-0.0002	8414	37.42	VPSSVDVASLVK
Q7X834	OSJNBa0019G23.2 protein OS=Oryza sativa subsp. japonica GN=OSJNBa0019G23.2 PE=4 SV=2	107032	19.5	5.82	0.0007	8415	22.16	VPSSVDVASLVK
Q7X834	OSJNBa0019G23.2 protein OS=Oryza sativa subsp. japonica GN=OSJNBa0019G23.2 PE=4 SV=2	107032	19.5	5.82	-0.0026	8539	21.07	GSYASNPDGPSR
Q7X834	OSJNBa0019G23.2 protein OS=Oryza sativa subsp. japonica GN=OSJNBa0019G23.2 PE=4 SV=2	107032	19.5	5.82	0.0005	8542	51.21	GSYASNPDGPSR
Q7X834	OSJNBa0019G23.2 protein OS=Oryza sativa subsp. japonica GN=OSJNBa0019G23.2 PE=4 SV=2	107032	19.5	5.82	-0.0001	9691	21.16	VYHPSTSQVEK
Q7X834	OSJNBa0019G23.2 protein OS=Oryza sativa subsp. japonica GN=OSJNBa0019G23.2 PE=4 SV=2	107032	19.5	5.82	0.0002	9693	27.59	VYHPSTSQVEK
Q7X834	OSJNBa0019G23.2 protein OS=Oryza sativa subsp. japonica GN=OSJNBa0019G23.2 PE=4 SV=2	107032	19.5	5.82	-0.0012	12396	58.8	CQLAVASYDAHGR
Q7X834	OSJNBa0019G23.2 protein OS=Oryza sativa subsp. japonica GN=OSJNBa0019G23.2 PE=4 SV=2	107032	19.5	5.82	-0.0002	13806	40.04	DFSAHDSTVDCNSR
Q7X834	OSJNBa0019G23.2 protein OS=Oryza sativa subsp. japonica GN=OSJNBa0019G23.2 PE=4 SV=2	107032	19.5	5.82	0.0003	13807	64.95	DFSAHDSTVDCNSR
Q7X834	OSJNBa0019G23.2 protein OS=Oryza sativa subsp. japonica GN=OSJNBa0019G23.2 PE=4 SV=2	107032	19.5	5.82	-0.0025	15592	22.73	VCFYDGPAGPLLQTVQLK
Q7X834	OSJNBa0019G23.2 protein OS=Oryza sativa subsp. japonica GN=OSJNBa0019G23.2 PE=4 SV=2	107032	19.5	5.82	-0.01	15702	111.74	GINASQINMSGTGIGSFNDR
Q7X834	OSJNBa0019G23.2 protein OS=Oryza sativa subsp. japonica GN=OSJNBa0019G23.2 PE=4 SV=2	107032	19.5	5.82	-0.0052	15703	120.86	GINASQINMSGTGIGSFNDR
Q7X834	OSJNBa0019G23.2 protein OS=Oryza sativa subsp. japonica GN=OSJNBa0019G23.2 PE=4 SV=2	107032	19.5	5.82	-0.005	15749	114.11	GINASQINMSGTGIGSFNDR
Q7X834	OSJNBa0019G23.2 protein OS=Oryza sativa subsp. japonica GN=OSJNBa0019G23.2 PE=4 SV=2	107032	19.5	5.82	0.0016	15750	107.45	GINASQINMSGTGIGSFNDR
Q10JA8	Glutelin OS=Oryza sativa subsp. japonica GN=Os03g0427300 PE=2 SV=1	56550	37.3	8.81	-0.0009	2551	54.24	IGQQLYR
Q10JA8	Glutelin OS=Oryza sativa subsp. japonica GN=Os03g0427300 PE=2 SV=1	56550	37.3	8.81	-0.0007	2552	62.87	IGQQLYR
Q10JA8	Glutelin OS=Oryza sativa subsp. japonica GN=Os03g0427300 PE=2 SV=1	56550	37.3	8.81	-0.0003	2553	42.87	IGQQLYR
Q10JA8	Glutelin OS=Oryza sativa subsp. japonica GN=Os03g0427300 PE=2 SV=1	56550	37.3	8.81	-0.0002	2556	29.29	IGQQLYR
Q10JA8	Glutelin OS=Oryza sativa subsp. japonica GN=Os03g0427300 PE=2 SV=1	56550	37.3	8.81	-0.0002	2557	35.74	IGQQLYR
Q10JA8	Glutelin OS=Oryza sativa subsp. japonica GN=Os03g0427300 PE=2 SV=1	56550	37.3	8.81	-0.0002	2558	32.32	IGQQLYR
Q10JA8	Glutelin OS=Oryza sativa subsp. japonica GN=Os03g0427300 PE=2 SV=1	56550	37.3	8.81	-0.0002	2559	41.14	IGQQLYR
Q10JA8	Glutelin OS=Oryza sativa subsp. japonica GN=Os03g0427300 PE=2 SV=1	56550	37.3	8.81	-0.0002	2561	34.22	IGQQLYR
Q10JA8	Glutelin OS=Oryza sativa subsp. japonica GN=Os03g0427300 PE=2 SV=1	56550	37.3	8.81	-0.0001	2563	30.46	IGQQLYR
Q10JA8	Glutelin OS=Oryza sativa subsp. japonica GN=Os03g0427300 PE=2 SV=1	56550	37.3	8.81	-0.0001	2564	31.9	IGQQLYR
Q10JA8	Glutelin OS=Oryza sativa subsp. japonica GN=Os03g0427300 PE=2 SV=1	56550	37.3	8.81	-0.0001	2565	57.14	IGQQLYR
Q10JA8	Glutelin OS=Oryza sativa subsp. japonica GN=Os03g0427300 PE=2 SV=1	56550	37.3	8.81	-0.0001	2566	33.09	IGQQLYR
Q10JA8	Glutelin OS=Oryza sativa subsp. japonica GN=Os03g0427300 PE=2 SV=1	56550	37.3	8.81	-0.0001	2567	38.99	IGQQLYR
Q10JA8	Glutelin OS=Oryza sativa subsp. japonica GN=Os03g0427300 PE=2 SV=1	56550	37.3	8.81	-0.0001	2568	45.15	IGQQLYR
Q10JA8	Glutelin OS=Oryza sativa subsp. japonica GN=Os03g0427300 PE=2 SV=1	56550	37.3	8.81	-0.0001	2569	50.33	IGQQLYR
Q10JA8	Glutelin OS=Oryza sativa subsp. japonica GN=Os03g0427300 PE=2 SV=1	56550	37.3	8.81	-0.0001	2570	31.05	IGQQLYR
Q10JA8	Glutelin OS=Oryza sativa subsp. japonica GN=Os03g0427300 PE=2 SV=1	56550	37.3	8.81	0	2571	48.55	IGQQLYR
Q10JA8	Glutelin OS=Oryza sativa subsp. japonica GN=Os03g0427300 PE=2 SV=1	56550	37.3	8.81	0.0001	2573	43.65	IGQQLYR
Q10JA8	Glutelin OS=Oryza sativa subsp. japonica GN=Os03g0427300 PE=2 SV=1	56550	37.3	8.81	0.0001	2574	69.22	IGQQLYR
Q10JA8	Glutelin OS=Oryza sativa subsp. japonica GN=Os03g0427300 PE=2 SV=1	56550	37.3	8.81	0.0001	2575	30.54	IGQQLYR
Q10JA8	Glutelin OS=Oryza sativa subsp. japonica GN=Os03g0427300 PE=2 SV=1	56550	37.3	8.81	0.0001	2576	33.71	IGQQLYR
Q10JA8	Glutelin OS=Oryza sativa subsp. japonica GN=Os03g0427300 PE=2 SV=1	56550	37.3	8.81	0.0001	2579	69.8	IGQQLYR
Q10JA8	Glutelin OS=Oryza sativa subsp. japonica GN=Os03g0427300 PE=2 SV=1	56550	37.3	8.81	0.0001	2580	55.12	IGQQLYR
Q10JA8	Glutelin OS=Oryza sativa subsp. japonica GN=Os03g0427300 PE=2 SV=1	56550	37.3	8.81	0.0001	2581	69.51	IGQQLYR
Q10JA8	Glutelin OS=Oryza sativa subsp. japonica GN=Os03g0427300 PE=2 SV=1	56550	37.3	8.81	0.0002	2582	60.1	IGQQLYR
Q10JA8	Glutelin OS=Oryza sativa subsp. japonica GN=Os03g0427300 PE=2 SV=1	56550	37.3	8.81	0.0002	2583	54.73	IGQQLYR
Q10JA8	Glutelin OS=Oryza sativa subsp. japonica GN=Os03g0427300 PE=2 SV=1	56550	37.3	8.81	0.0004	2584	33.96	IGQQLYR
Q10JA8	Glutelin OS=Oryza sativa subsp. japonica GN=Os03g0427300 PE=2 SV=1	56550	37.3	8.81	-0.0037	3306	20.53	TVFDGELR
Q10JA8	Glutelin OS=Oryza sativa subsp. japonica GN=Os03g0427300 PE=2 SV=1	56550	37.3	8.81	-0.0025	3307	24.83	TVFDGELR
Q10JA8	Glutelin OS=Oryza sativa subsp. japonica GN=Os03g0427300 PE=2 SV=1	56550	37.3	8.81	-0.0011	3308	21.3	TVFDGELR
Q10JA8	Glutelin OS=Oryza sativa subsp. japonica GN=Os03g0427300 PE=2 SV=1	56550	37.3	8.81	-0.0004	5069	20.94	DFFLAGNNK
Q10JA8	Glutelin OS=Oryza sativa subsp. japonica GN=Os03g0427300 PE=2 SV=1	56550	37.3	8.81	0.0012	5070	33.92	DFFLAGNNK
Q10JA8	Glutelin OS=Oryza sativa subsp. japonica GN=Os03g0427300 PE=2 SV=1	56550	37.3	8.81	0.0003	5281	36.19	EGCSYIALK
Q10JA8	Glutelin OS=Oryza sativa subsp. japonica GN=Os03g0427300 PE=2 SV=1	56550	37.3	8.81	0.0003	5282	44.72	EGCSYIALK
Q10JA8	Glutelin OS=Oryza sativa subsp. japonica GN=Os03g0427300 PE=2 SV=1	56550	37.3	8.81	0.0005	5283	41.43	EGCSYIALK
Q10JA8	Glutelin OS=Oryza sativa subsp. japonica GN=Os03g0427300 PE=2 SV=1	56550	37.3	8.81	0.0005	5284	45.48	EGCSYIALK
Q10JA8	Glutelin OS=Oryza sativa subsp. japonica GN=Os03g0427300 PE=2 SV=1	56550	37.3	8.81	0.0006	5285	25.7	EGCSYIALK
Q10JA8	Glutelin OS=Oryza sativa subsp. japonica GN=Os03g0427300 PE=2 SV=1	56550	37.3	8.81	-0.0013	9379	24.08	DYGQTQYQQK
Q10JA8	Glutelin OS=Oryza sativa subsp. japonica GN=Os03g0427300 PE=2 SV=1	56550	37.3	8.81	-0.0001	9380	33.13	DYGQTQYQQK
Q10JA8	Glutelin OS=Oryza sativa subsp. japonica GN=Os03g0427300 PE=2 SV=1	56550	37.3	8.81	0.0002	9381	43.4	DYGQTQYQQK
Q10JA8	Glutelin OS=Oryza sativa subsp. japonica GN=Os03g0427300 PE=2 SV=1	56550	37.3	8.81	0.0003	9382	23.41	DYGQTQYQQK
Q10JA8	Glutelin OS=Oryza sativa subsp. japonica GN=Os03g0427300 PE=2 SV=1	56550	37.3	8.81	0.0003	9383	24.24	DYGQTQYQQK
Q10JA8	Glutelin OS=Oryza sativa subsp. japonica GN=Os03g0427300 PE=2 SV=1	56550	37.3	8.81	0.0004	9384	34.86	DYGQTQYQQK
Q10JA8	Glutelin OS=Oryza sativa subsp. japonica GN=Os03g0427300 PE=2 SV=1	56550	37.3	8.81	0.0006	9385	37.24	DYGQTQYQQK
Q10JA8	Glutelin OS=Oryza sativa subsp. japonica GN=Os03g0427300 PE=2 SV=1	56550	37.3	8.81	0.0011	9386	33.28	DYGQTQYQQK
Q10JA8	Glutelin OS=Oryza sativa subsp. japonica GN=Os03g0427300 PE=2 SV=1	56550	37.3	8.81	0.0021	9387	23.74	DYGQTQYQQK
Q10JA8	Glutelin OS=Oryza sativa subsp. japonica GN=Os03g0427300 PE=2 SV=1	56550	37.3	8.81	0.0023	9388	30.5	DYGQTQYQQK
Q10JA8	Glutelin OS=Oryza sativa subsp. japonica GN=Os03g0427300 PE=2 SV=1	56550	37.3	8.81	-0.0012	10263	46.57	ALPDDVVANAYR
Q10JA8	Glutelin OS=Oryza sativa subsp. japonica GN=Os03g0427300 PE=2 SV=1	56550	37.3	8.81	-0.0001	10264	63.44	ALPDDVVANAYR
Q10JA8	Glutelin OS=Oryza sativa subsp. japonica GN=Os03g0427300 PE=2 SV=1	56550	37.3	8.81	-0.0001	10265	59.17	ALPDDVVANAYR
Q10JA8	Glutelin OS=Oryza sativa subsp. japonica GN=Os03g0427300 PE=2 SV=1	56550	37.3	8.81	-0.0001	10266	66.82	ALPDDVVANAYR
Q10JA8	Glutelin OS=Oryza sativa subsp. japonica GN=Os03g0427300 PE=2 SV=1	56550	37.3	8.81	-0.0001	10267	68.23	ALPDDVVANAYR
Q10JA8	Glutelin OS=Oryza sativa subsp. japonica GN=Os03g0427300 PE=2 SV=1	56550	37.3	8.81	0	10268	63.34	ALPDDVVANAYR
Q10JA8	Glutelin OS=Oryza sativa subsp. japonica GN=Os03g0427300 PE=2 SV=1	56550	37.3	8.81	-0.0013	11509	52.37	TNPDSMVSHMAGK
Q10JA8	Glutelin OS=Oryza sativa subsp. japonica GN=Os03g0427300 PE=2 SV=1	56550	37.3	8.81	-0.0008	11510	62.52	TNPDSMVSHMAGK
Q10JA8	Glutelin OS=Oryza sativa subsp. japonica GN=Os03g0427300 PE=2 SV=1	56550	37.3	8.81	0.0003	11752	55.22	TNPDSMVSHMAGK
Q10JA8	Glutelin OS=Oryza sativa subsp. japonica GN=Os03g0427300 PE=2 SV=1	56550	37.3	8.81	0.0004	12974	33.83	GDELGVFTPSHAYK
Q10JA8	Glutelin OS=Oryza sativa subsp. japonica GN=Os03g0427300 PE=2 SV=1	56550	37.3	8.81	0.0007	12975	31.1	GDELGVFTPSHAYK
Q10JA8	Glutelin OS=Oryza sativa subsp. japonica GN=Os03g0427300 PE=2 SV=1	56550	37.3	8.81	-0.0083	14676	31.07	QNIDNPNLADTYNPR
Q10JA8	Glutelin OS=Oryza sativa subsp. japonica GN=Os03g0427300 PE=2 SV=1	56550	37.3	8.81	-0.0035	14677	47.93	QNIDNPNLADTYNPR
Q10JA8	Glutelin OS=Oryza sativa subsp. japonica GN=Os03g0427300 PE=2 SV=1	56550	37.3	8.81	-0.0032	14678	67.42	QNIDNPNLADTYNPR
Q10JA8	Glutelin OS=Oryza sativa subsp. japonica GN=Os03g0427300 PE=2 SV=1	56550	37.3	8.81	-0.0023	14679	70.12	QNIDNPNLADTYNPR
Q10JA8	Glutelin OS=Oryza sativa subsp. japonica GN=Os03g0427300 PE=2 SV=1	56550	37.3	8.81	-0.0023	14680	62.33	QNIDNPNLADTYNPR
Q10JA8	Glutelin OS=Oryza sativa subsp. japonica GN=Os03g0427300 PE=2 SV=1	56550	37.3	8.81	-0.001	14681	96.82	QNIDNPNLADTYNPR
Q10JA8	Glutelin OS=Oryza sativa subsp. japonica GN=Os03g0427300 PE=2 SV=1	56550	37.3	8.81	-0.0007	14682	74.71	QNIDNPNLADTYNPR
Q10JA8	Glutelin OS=Oryza sativa subsp. japonica GN=Os03g0427300 PE=2 SV=1	56550	37.3	8.81	-0.0004	14683	86	QNIDNPNLADTYNPR
Q10JA8	Glutelin OS=Oryza sativa subsp. japonica GN=Os03g0427300 PE=2 SV=1	56550	37.3	8.81	-0.0004	14684	89.58	QNIDNPNLADTYNPR
Q10JA8	Glutelin OS=Oryza sativa subsp. japonica GN=Os03g0427300 PE=2 SV=1	56550	37.3	8.81	-0.0001	14685	71.36	QNIDNPNLADTYNPR
Q10JA8	Glutelin OS=Oryza sativa subsp. japonica GN=Os03g0427300 PE=2 SV=1	56550	37.3	8.81	0	14686	56.53	QNIDNPNLADTYNPR
Q10JA8	Glutelin OS=Oryza sativa subsp. japonica GN=Os03g0427300 PE=2 SV=1	56550	37.3	8.81	0.0005	14687	90.19	QNIDNPNLADTYNPR
Q10JA8	Glutelin OS=Oryza sativa subsp. japonica GN=Os03g0427300 PE=2 SV=1	56550	37.3	8.81	0.0006	14688	71.46	QNIDNPNLADTYNPR
Q10JA8	Glutelin OS=Oryza sativa subsp. japonica GN=Os03g0427300 PE=2 SV=1	56550	37.3	8.81	0.0026	14689	99.49	QNIDNPNLADTYNPR
Q10JA8	Glutelin OS=Oryza sativa subsp. japonica GN=Os03g0427300 PE=2 SV=1	56550	37.3	8.81	0.0027	14690	77.97	QNIDNPNLADTYNPR
Q10JA8	Glutelin OS=Oryza sativa subsp. japonica GN=Os03g0427300 PE=2 SV=1	56550	37.3	8.81	0.0082	14692	56.34	QNIDNPNLADTYNPR
Q10JA8	Glutelin OS=Oryza sativa subsp. japonica GN=Os03g0427300 PE=2 SV=1	56550	37.3	8.81	-0.0032	16537	99.94	VEHGLSLLQPYASLQEQQQEQVQSR
Q10JA8	Glutelin OS=Oryza sativa subsp. japonica GN=Os03g0427300 PE=2 SV=1	56550	37.3	8.81	-0.0013	16728	33.51	GITGPTFPGCPETYQQQFQQSEQDQQLEGQSQSHK
Q6K508	Glutelin OS=Oryza sativa subsp. japonica GN=OSJNBa0011N12.22 PE=2 SV=1	55226	28.7	9.34	-0.0002	2742	33.24	ADYYNPR
Q6K508	Glutelin OS=Oryza sativa subsp. japonica GN=OSJNBa0011N12.22 PE=2 SV=1	55226	28.7	9.34	-0.0006	3404	30.61	ITLLNNQK
Q6K508	Glutelin OS=Oryza sativa subsp. japonica GN=OSJNBa0011N12.22 PE=2 SV=1	55226	28.7	9.34	-0.0005	3406	38.37	ITLLNNQK
Q6K508	Glutelin OS=Oryza sativa subsp. japonica GN=OSJNBa0011N12.22 PE=2 SV=1	55226	28.7	9.34	-0.0005	3407	24.19	ITLLNNQK
Q6K508	Glutelin OS=Oryza sativa subsp. japonica GN=OSJNBa0011N12.22 PE=2 SV=1	55226	28.7	9.34	-0.0002	3411	29.65	ITLLNNQK
Q6K508	Glutelin OS=Oryza sativa subsp. japonica GN=OSJNBa0011N12.22 PE=2 SV=1	55226	28.7	9.34	0.0009	3465	31.94	ITLLNNQK
Q6K508	Glutelin OS=Oryza sativa subsp. japonica GN=OSJNBa0011N12.22 PE=2 SV=1	55226	28.7	9.34	0.0024	3467	21.67	ITLLNNQK
Q6K508	Glutelin OS=Oryza sativa subsp. japonica GN=OSJNBa0011N12.22 PE=2 SV=1	55226	28.7	9.34	0.0025	3468	26.91	ITLLNNQK
Q6K508	Glutelin OS=Oryza sativa subsp. japonica GN=OSJNBa0011N12.22 PE=2 SV=1	55226	28.7	9.34	0.003	3471	22.92	ITLLNNQK
Q6K508	Glutelin OS=Oryza sativa subsp. japonica GN=OSJNBa0011N12.22 PE=2 SV=1	55226	28.7	9.34	0.0035	3472	24.45	ITLLNNQK
Q6K508	Glutelin OS=Oryza sativa subsp. japonica GN=OSJNBa0011N12.22 PE=2 SV=1	55226	28.7	9.34	0.0042	3473	20.06	ITLLNNQK
Q6K508	Glutelin OS=Oryza sativa subsp. japonica GN=OSJNBa0011N12.22 PE=2 SV=1	55226	28.7	9.34	0.0015	4243	20.09	VQVANNQGR
Q6K508	Glutelin OS=Oryza sativa subsp. japonica GN=OSJNBa0011N12.22 PE=2 SV=1	55226	28.7	9.34	0	5670	39.77	SFANQLEPR
Q6K508	Glutelin OS=Oryza sativa subsp. japonica GN=OSJNBa0011N12.22 PE=2 SV=1	55226	28.7	9.34	0.0005	5671	48.46	SFANQLEPR
Q6K508	Glutelin OS=Oryza sativa subsp. japonica GN=OSJNBa0011N12.22 PE=2 SV=1	55226	28.7	9.34	0.0006	5672	32.37	SFANQLEPR
Q6K508	Glutelin OS=Oryza sativa subsp. japonica GN=OSJNBa0011N12.22 PE=2 SV=1	55226	28.7	9.34	0.0007	5673	43.96	SFANQLEPR
Q6K508	Glutelin OS=Oryza sativa subsp. japonica GN=OSJNBa0011N12.22 PE=2 SV=1	55226	28.7	9.34	0.001	5674	69.21	SFANQLEPR
Q6K508	Glutelin OS=Oryza sativa subsp. japonica GN=OSJNBa0011N12.22 PE=2 SV=1	55226	28.7	9.34	0.0004	6361	30.36	ADEIGPFTPR
Q6K508	Glutelin OS=Oryza sativa subsp. japonica GN=OSJNBa0011N12.22 PE=2 SV=1	55226	28.7	9.34	0.0004	6362	22.82	ADEIGPFTPR
Q6K508	Glutelin OS=Oryza sativa subsp. japonica GN=OSJNBa0011N12.22 PE=2 SV=1	55226	28.7	9.34	-0.0005	6630	36.24	QYQQVQYR
Q6K508	Glutelin OS=Oryza sativa subsp. japonica GN=OSJNBa0011N12.22 PE=2 SV=1	55226	28.7	9.34	-0.0002	6633	41.95	QYQQVQYR
Q6K508	Glutelin OS=Oryza sativa subsp. japonica GN=OSJNBa0011N12.22 PE=2 SV=1	55226	28.7	9.34	0.0001	8528	33.46	VIEPQGLVVPR
Q6K508	Glutelin OS=Oryza sativa subsp. japonica GN=OSJNBa0011N12.22 PE=2 SV=1	55226	28.7	9.34	0.0006	8529	42.96	VIEPQGLVVPR
Q6K508	Glutelin OS=Oryza sativa subsp. japonica GN=OSJNBa0011N12.22 PE=2 SV=1	55226	28.7	9.34	0.0015	8530	21.5	VIEPQGLVVPR
Q6K508	Glutelin OS=Oryza sativa subsp. japonica GN=OSJNBa0011N12.22 PE=2 SV=1	55226	28.7	9.34	-0.0018	10220	23.32	ALPVDVIANAYR
Q6K508	Glutelin OS=Oryza sativa subsp. japonica GN=OSJNBa0011N12.22 PE=2 SV=1	55226	28.7	9.34	-0.0009	10221	49.44	ALPVDVIANAYR
Q6K508	Glutelin OS=Oryza sativa subsp. japonica GN=OSJNBa0011N12.22 PE=2 SV=1	55226	28.7	9.34	-0.0024	11302	50.19	TISDPTVSWVAGK
Q6K508	Glutelin OS=Oryza sativa subsp. japonica GN=OSJNBa0011N12.22 PE=2 SV=1	55226	28.7	9.34	0	11303	74.07	TISDPTVSWVAGK
Q6K508	Glutelin OS=Oryza sativa subsp. japonica GN=OSJNBa0011N12.22 PE=2 SV=1	55226	28.7	9.34	0.0018	11304	73.42	TISDPTVSWVAGK
Q6K508	Glutelin OS=Oryza sativa subsp. japonica GN=OSJNBa0011N12.22 PE=2 SV=1	55226	28.7	9.34	-0.0014	11349	39.17	RVIEPQGLVVPR
Q6K508	Glutelin OS=Oryza sativa subsp. japonica GN=OSJNBa0011N12.22 PE=2 SV=1	55226	28.7	9.34	-0.0011	12120	74.49	SEAGDTEYFDER
Q6K508	Glutelin OS=Oryza sativa subsp. japonica GN=OSJNBa0011N12.22 PE=2 SV=1	55226	28.7	9.34	-0.0003	12121	93.56	SEAGDTEYFDER
Q6K508	Glutelin OS=Oryza sativa subsp. japonica GN=OSJNBa0011N12.22 PE=2 SV=1	55226	28.7	9.34	-0.0001	12122	101.33	SEAGDTEYFDER
Q6K508	Glutelin OS=Oryza sativa subsp. japonica GN=OSJNBa0011N12.22 PE=2 SV=1	55226	28.7	9.34	-0.0001	12123	101.36	SEAGDTEYFDER
Q6K508	Glutelin OS=Oryza sativa subsp. japonica GN=OSJNBa0011N12.22 PE=2 SV=1	55226	28.7	9.34	0	12124	36.24	SEAGDTEYFDER
Q6K508	Glutelin OS=Oryza sativa subsp. japonica GN=OSJNBa0011N12.22 PE=2 SV=1	55226	28.7	9.34	0.0002	12125	101.28	SEAGDTEYFDER
Q6K508	Glutelin OS=Oryza sativa subsp. japonica GN=OSJNBa0011N12.22 PE=2 SV=1	55226	28.7	9.34	0.0003	12126	101.48	SEAGDTEYFDER
Q6K508	Glutelin OS=Oryza sativa subsp. japonica GN=OSJNBa0011N12.22 PE=2 SV=1	55226	28.7	9.34	0.0003	12127	94.14	SEAGDTEYFDER
Q6K508	Glutelin OS=Oryza sativa subsp. japonica GN=OSJNBa0011N12.22 PE=2 SV=1	55226	28.7	9.34	0.0012	12128	62.21	SEAGDTEYFDER
Q6K508	Glutelin OS=Oryza sativa subsp. japonica GN=OSJNBa0011N12.22 PE=2 SV=1	55226	28.7	9.34	-0.0006	13133	58.44	YSNTPALAYIIQGK
Q6K508	Glutelin OS=Oryza sativa subsp. japonica GN=OSJNBa0011N12.22 PE=2 SV=1	55226	28.7	9.34	0.0044	13135	35.53	YSNTPALAYIIQGK
Q6Z782	Os02g0202400 protein OS=Oryza sativa subsp. japonica GN=P0419A09.38 PE=3 SV=1	45791	35.8	9.52	0.0001	1685	42.02	GGGGLLSLR
Q6Z782	Os02g0202400 protein OS=Oryza sativa subsp. japonica GN=P0419A09.38 PE=3 SV=1	45791	35.8	9.52	-0.0008	1718	22.8	GLGPSCIK
Q6Z782	Os02g0202400 protein OS=Oryza sativa subsp. japonica GN=P0419A09.38 PE=3 SV=1	45791	35.8	9.52	-0.0007	1721	30.64	GLGPSCIK
Q6Z782	Os02g0202400 protein OS=Oryza sativa subsp. japonica GN=P0419A09.38 PE=3 SV=1	45791	35.8	9.52	-0.0006	1723	21.08	GLGPSCIK
Q6Z782	Os02g0202400 protein OS=Oryza sativa subsp. japonica GN=P0419A09.38 PE=3 SV=1	45791	35.8	9.52	-0.0005	1727	22.4	GLGPSCIK
Q6Z782	Os02g0202400 protein OS=Oryza sativa subsp. japonica GN=P0419A09.38 PE=3 SV=1	45791	35.8	9.52	-0.0004	1728	32.57	GLGPSCIK
Q6Z782	Os02g0202400 protein OS=Oryza sativa subsp. japonica GN=P0419A09.38 PE=3 SV=1	45791	35.8	9.52	-0.0004	1730	26.68	GLGPSCIK
Q6Z782	Os02g0202400 protein OS=Oryza sativa subsp. japonica GN=P0419A09.38 PE=3 SV=1	45791	35.8	9.52	-0.0004	1732	28.33	GLGPSCIK
Q6Z782	Os02g0202400 protein OS=Oryza sativa subsp. japonica GN=P0419A09.38 PE=3 SV=1	45791	35.8	9.52	-0.0002	1734	23.74	GLGPSCIK
Q6Z782	Os02g0202400 protein OS=Oryza sativa subsp. japonica GN=P0419A09.38 PE=3 SV=1	45791	35.8	9.52	-0.0002	1735	23.21	GLGPSCIK
Q6Z782	Os02g0202400 protein OS=Oryza sativa subsp. japonica GN=P0419A09.38 PE=3 SV=1	45791	35.8	9.52	-0.0001	1737	24.81	GLGPSCIK
Q6Z782	Os02g0202400 protein OS=Oryza sativa subsp. japonica GN=P0419A09.38 PE=3 SV=1	45791	35.8	9.52	-0.0001	1740	26.51	GLGPSCIK
Q6Z782	Os02g0202400 protein OS=Oryza sativa subsp. japonica GN=P0419A09.38 PE=3 SV=1	45791	35.8	9.52	0	1742	24.72	GLGPSCIK
Q6Z782	Os02g0202400 protein OS=Oryza sativa subsp. japonica GN=P0419A09.38 PE=3 SV=1	45791	35.8	9.52	0	1744	25.9	GLGPSCIK
Q6Z782	Os02g0202400 protein OS=Oryza sativa subsp. japonica GN=P0419A09.38 PE=3 SV=1	45791	35.8	9.52	0	1745	21.85	GLGPSCIK
Q6Z782	Os02g0202400 protein OS=Oryza sativa subsp. japonica GN=P0419A09.38 PE=3 SV=1	45791	35.8	9.52	0.0001	1747	20.48	GLGPSCIK
Q6Z782	Os02g0202400 protein OS=Oryza sativa subsp. japonica GN=P0419A09.38 PE=3 SV=1	45791	35.8	9.52	0.0005	1758	25.37	GLGPSCIK
Q6Z782	Os02g0202400 protein OS=Oryza sativa subsp. japonica GN=P0419A09.38 PE=3 SV=1	45791	35.8	9.52	0.0006	1759	33.7	GLGPSCIK
Q6Z782	Os02g0202400 protein OS=Oryza sativa subsp. japonica GN=P0419A09.38 PE=3 SV=1	45791	35.8	9.52	0.0007	1760	27.55	GLGPSCIK
Q6Z782	Os02g0202400 protein OS=Oryza sativa subsp. japonica GN=P0419A09.38 PE=3 SV=1	45791	35.8	9.52	0.0015	1764	37.14	GLGPSCIK
Q6Z782	Os02g0202400 protein OS=Oryza sativa subsp. japonica GN=P0419A09.38 PE=3 SV=1	45791	35.8	9.52	-0.0002	1921	45.26	GNAVNVLR
Q6Z782	Os02g0202400 protein OS=Oryza sativa subsp. japonica GN=P0419A09.38 PE=3 SV=1	45791	35.8	9.52	-0.0001	1922	35.74	GNAVNVLR
Q6Z782	Os02g0202400 protein OS=Oryza sativa subsp. japonica GN=P0419A09.38 PE=3 SV=1	45791	35.8	9.52	-0.0001	1923	46.08	GNAVNVLR
Q6Z782	Os02g0202400 protein OS=Oryza sativa subsp. japonica GN=P0419A09.38 PE=3 SV=1	45791	35.8	9.52	0	1924	26.83	GNAVNVLR
Q6Z782	Os02g0202400 protein OS=Oryza sativa subsp. japonica GN=P0419A09.38 PE=3 SV=1	45791	35.8	9.52	-0.0002	2697	47.51	GEGAAGLYR
Q6Z782	Os02g0202400 protein OS=Oryza sativa subsp. japonica GN=P0419A09.38 PE=3 SV=1	45791	35.8	9.52	0.0001	2698	36.94	GEGAAGLYR
Q6Z782	Os02g0202400 protein OS=Oryza sativa subsp. japonica GN=P0419A09.38 PE=3 SV=1	45791	35.8	9.52	-0.0018	4086	22.31	EGGPGELYR
Q6Z782	Os02g0202400 protein OS=Oryza sativa subsp. japonica GN=P0419A09.38 PE=3 SV=1	45791	35.8	9.52	-0.0009	4088	43.5	EGGPGELYR
Q6Z782	Os02g0202400 protein OS=Oryza sativa subsp. japonica GN=P0419A09.38 PE=3 SV=1	45791	35.8	9.52	-0.0008	4089	24.7	EGGPGELYR
Q6Z782	Os02g0202400 protein OS=Oryza sativa subsp. japonica GN=P0419A09.38 PE=3 SV=1	45791	35.8	9.52	-0.0007	4090	30.35	EGGPGELYR
Q6Z782	Os02g0202400 protein OS=Oryza sativa subsp. japonica GN=P0419A09.38 PE=3 SV=1	45791	35.8	9.52	-0.0005	4091	35.86	EGGPGELYR
Q6Z782	Os02g0202400 protein OS=Oryza sativa subsp. japonica GN=P0419A09.38 PE=3 SV=1	45791	35.8	9.52	-0.0004	4092	22.24	EGGPGELYR
Q6Z782	Os02g0202400 protein OS=Oryza sativa subsp. japonica GN=P0419A09.38 PE=3 SV=1	45791	35.8	9.52	-0.0004	4094	42.95	EGGPGELYR
Q6Z782	Os02g0202400 protein OS=Oryza sativa subsp. japonica GN=P0419A09.38 PE=3 SV=1	45791	35.8	9.52	-0.0003	4095	45.4	EGGPGELYR
Q6Z782	Os02g0202400 protein OS=Oryza sativa subsp. japonica GN=P0419A09.38 PE=3 SV=1	45791	35.8	9.52	-0.0003	4096	30.63	EGGPGELYR
Q6Z782	Os02g0202400 protein OS=Oryza sativa subsp. japonica GN=P0419A09.38 PE=3 SV=1	45791	35.8	9.52	-0.0002	4097	49.57	EGGPGELYR
Q6Z782	Os02g0202400 protein OS=Oryza sativa subsp. japonica GN=P0419A09.38 PE=3 SV=1	45791	35.8	9.52	-0.0002	4098	29.9	EGGPGELYR
Q6Z782	Os02g0202400 protein OS=Oryza sativa subsp. japonica GN=P0419A09.38 PE=3 SV=1	45791	35.8	9.52	-0.0002	4100	22.15	EGGPGELYR
Q6Z782	Os02g0202400 protein OS=Oryza sativa subsp. japonica GN=P0419A09.38 PE=3 SV=1	45791	35.8	9.52	-0.0002	4101	26.09	EGGPGELYR
Q6Z782	Os02g0202400 protein OS=Oryza sativa subsp. japonica GN=P0419A09.38 PE=3 SV=1	45791	35.8	9.52	0	4103	27.27	EGGPGELYR
Q6Z782	Os02g0202400 protein OS=Oryza sativa subsp. japonica GN=P0419A09.38 PE=3 SV=1	45791	35.8	9.52	0.0002	4104	21.36	EGGPGELYR
Q6Z782	Os02g0202400 protein OS=Oryza sativa subsp. japonica GN=P0419A09.38 PE=3 SV=1	45791	35.8	9.52	0.0003	4105	47.87	EGGPGELYR
Q6Z782	Os02g0202400 protein OS=Oryza sativa subsp. japonica GN=P0419A09.38 PE=3 SV=1	45791	35.8	9.52	0.0004	4107	38.28	EGGPGELYR
Q6Z782	Os02g0202400 protein OS=Oryza sativa subsp. japonica GN=P0419A09.38 PE=3 SV=1	45791	35.8	9.52	0.0004	4108	36.28	EGGPGELYR
Q6Z782	Os02g0202400 protein OS=Oryza sativa subsp. japonica GN=P0419A09.38 PE=3 SV=1	45791	35.8	9.52	0.0004	4109	29.33	EGGPGELYR
Q6Z782	Os02g0202400 protein OS=Oryza sativa subsp. japonica GN=P0419A09.38 PE=3 SV=1	45791	35.8	9.52	0.0006	4112	32.42	EGGPGELYR
Q6Z782	Os02g0202400 protein OS=Oryza sativa subsp. japonica GN=P0419A09.38 PE=3 SV=1	45791	35.8	9.52	-0.0001	4636	56.64	QMQVGAVGGR
Q6Z782	Os02g0202400 protein OS=Oryza sativa subsp. japonica GN=P0419A09.38 PE=3 SV=1	45791	35.8	9.52	0	4637	42.98	QMQVGAVGGR
Q6Z782	Os02g0202400 protein OS=Oryza sativa subsp. japonica GN=P0419A09.38 PE=3 SV=1	45791	35.8	9.52	-0.0003	6338	21.78	LVSGAIAGAVSR
Q6Z782	Os02g0202400 protein OS=Oryza sativa subsp. japonica GN=P0419A09.38 PE=3 SV=1	45791	35.8	9.52	0.0002	6339	42.16	LVSGAIAGAVSR
Q6Z782	Os02g0202400 protein OS=Oryza sativa subsp. japonica GN=P0419A09.38 PE=3 SV=1	45791	35.8	9.52	0.0002	6340	46.9	LVSGAIAGAVSR
Q6Z782	Os02g0202400 protein OS=Oryza sativa subsp. japonica GN=P0419A09.38 PE=3 SV=1	45791	35.8	9.52	0.0003	6341	46.67	LVSGAIAGAVSR
Q6Z782	Os02g0202400 protein OS=Oryza sativa subsp. japonica GN=P0419A09.38 PE=3 SV=1	45791	35.8	9.52	0.0004	6342	42	LVSGAIAGAVSR
Q6Z782	Os02g0202400 protein OS=Oryza sativa subsp. japonica GN=P0419A09.38 PE=3 SV=1	45791	35.8	9.52	-0.0002	7042	21.33	KQMQVGAVGGR
Q6Z782	Os02g0202400 protein OS=Oryza sativa subsp. japonica GN=P0419A09.38 PE=3 SV=1	45791	35.8	9.52	0.0001	7044	63.28	KQMQVGAVGGR
Q6Z782	Os02g0202400 protein OS=Oryza sativa subsp. japonica GN=P0419A09.38 PE=3 SV=1	45791	35.8	9.52	0.0001	7045	31.57	KQMQVGAVGGR
Q6Z782	Os02g0202400 protein OS=Oryza sativa subsp. japonica GN=P0419A09.38 PE=3 SV=1	45791	35.8	9.52	-0.0009	7456	23.54	TFVAPLETIR
Q6Z782	Os02g0202400 protein OS=Oryza sativa subsp. japonica GN=P0419A09.38 PE=3 SV=1	45791	35.8	9.52	0.0002	9394	75.46	QLAAAEAEEAAGK
Q6Z782	Os02g0202400 protein OS=Oryza sativa subsp. japonica GN=P0419A09.38 PE=3 SV=1	45791	35.8	9.52	0.0002	9395	54.84	QLAAAEAEEAAGK
Q6Z782	Os02g0202400 protein OS=Oryza sativa subsp. japonica GN=P0419A09.38 PE=3 SV=1	45791	35.8	9.52	0.0003	9396	84.42	QLAAAEAEEAAGK
Q6Z782	Os02g0202400 protein OS=Oryza sativa subsp. japonica GN=P0419A09.38 PE=3 SV=1	45791	35.8	9.52	0.0003	9397	80.97	QLAAAEAEEAAGK
Q6Z782	Os02g0202400 protein OS=Oryza sativa subsp. japonica GN=P0419A09.38 PE=3 SV=1	45791	35.8	9.52	0.0003	9398	84.95	QLAAAEAEEAAGK
Q6Z782	Os02g0202400 protein OS=Oryza sativa subsp. japonica GN=P0419A09.38 PE=3 SV=1	45791	35.8	9.52	0.0003	9399	76.28	QLAAAEAEEAAGK
Q6Z782	Os02g0202400 protein OS=Oryza sativa subsp. japonica GN=P0419A09.38 PE=3 SV=1	45791	35.8	9.52	0.0003	9400	78.67	QLAAAEAEEAAGK
Q6Z782	Os02g0202400 protein OS=Oryza sativa subsp. japonica GN=P0419A09.38 PE=3 SV=1	45791	35.8	9.52	0.0004	9401	78.28	QLAAAEAEEAAGK
Q6Z782	Os02g0202400 protein OS=Oryza sativa subsp. japonica GN=P0419A09.38 PE=3 SV=1	45791	35.8	9.52	0.0005	9402	87.52	QLAAAEAEEAAGK
Q6Z782	Os02g0202400 protein OS=Oryza sativa subsp. japonica GN=P0419A09.38 PE=3 SV=1	45791	35.8	9.52	0.0005	9403	50	QLAAAEAEEAAGK
Q6Z782	Os02g0202400 protein OS=Oryza sativa subsp. japonica GN=P0419A09.38 PE=3 SV=1	45791	35.8	9.52	0.0007	9404	49.11	QLAAAEAEEAAGK
Q6Z782	Os02g0202400 protein OS=Oryza sativa subsp. japonica GN=P0419A09.38 PE=3 SV=1	45791	35.8	9.52	0.0021	9405	49.38	QLAAAEAEEAAGK
Q6Z782	Os02g0202400 protein OS=Oryza sativa subsp. japonica GN=P0419A09.38 PE=3 SV=1	45791	35.8	9.52	-0.0009	10098	35.83	AIEHFTYDTAK
Q6Z782	Os02g0202400 protein OS=Oryza sativa subsp. japonica GN=P0419A09.38 PE=3 SV=1	45791	35.8	9.52	-0.0128	16198	31.12	VLVEEEAAPELEAECAEEIK
Q6Z782	Os02g0202400 protein OS=Oryza sativa subsp. japonica GN=P0419A09.38 PE=3 SV=1	45791	35.8	9.52	-0.0002	16404	70.83	VLVEEEAAPELEAECAEEIKEK
Q6Z782	Os02g0202400 protein OS=Oryza sativa subsp. japonica GN=P0419A09.38 PE=3 SV=1	45791	35.8	9.52	0.0015	16508	55	ADVGPAATLLIGSAAGAIASTATFPLEVAR
Q0DA62	Os06g0675700 protein OS=Oryza sativa subsp. japonica GN=Os06g0675700 PE=4 SV=1	96503	15.5	8.7	-0.001	8757	28.25	FSGATESGGGVVR
Q0DA62	Os06g0675700 protein OS=Oryza sativa subsp. japonica GN=Os06g0675700 PE=4 SV=1	96503	15.5	8.7	-0.0008	8758	27.41	FSGATESGGGVVR
Q0DA62	Os06g0675700 protein OS=Oryza sativa subsp. japonica GN=Os06g0675700 PE=4 SV=1	96503	15.5	8.7	0.0024	8762	20.66	FSGATESGGGVVR
Q0DA62	Os06g0675700 protein OS=Oryza sativa subsp. japonica GN=Os06g0675700 PE=4 SV=1	96503	15.5	8.7	-0.0002	11950	100.13	NVADLEGVVAGYAK
Q0DA62	Os06g0675700 protein OS=Oryza sativa subsp. japonica GN=Os06g0675700 PE=4 SV=1	96503	15.5	8.7	0.0004	14610	102.64	LELAGGGGGAAPELGPDVR
Q0DA62	Os06g0675700 protein OS=Oryza sativa subsp. japonica GN=Os06g0675700 PE=4 SV=1	96503	15.5	8.7	0.0007	14611	80.1	LELAGGGGGAAPELGPDVR
Q0DA62	Os06g0675700 protein OS=Oryza sativa subsp. japonica GN=Os06g0675700 PE=4 SV=1	96503	15.5	8.7	0.0021	14612	55.82	LELAGGGGGAAPELGPDVR
Q0DA62	Os06g0675700 protein OS=Oryza sativa subsp. japonica GN=Os06g0675700 PE=4 SV=1	96503	15.5	8.7	-0.0036	14760	39.12	STGDVLFDTTPNLVFK
P15280	Glucose-1-phosphate adenylyltransferase small subunit, chloroplastic/amyloplastic OS=Oryza sativa subsp. japonica GN=AGPS PE=2 SV=4	56468	34.8	6.58	-0.0002	367	20.11	LYPLTK
P15280	Glucose-1-phosphate adenylyltransferase small subunit, chloroplastic/amyloplastic OS=Oryza sativa subsp. japonica GN=AGPS PE=2 SV=4	56468	34.8	6.58	-0.0002	368	24.53	LYPLTK
P15280	Glucose-1-phosphate adenylyltransferase small subunit, chloroplastic/amyloplastic OS=Oryza sativa subsp. japonica GN=AGPS PE=2 SV=4	56468	34.8	6.58	-0.0001	370	21.36	LYPLTK
P15280	Glucose-1-phosphate adenylyltransferase small subunit, chloroplastic/amyloplastic OS=Oryza sativa subsp. japonica GN=AGPS PE=2 SV=4	56468	34.8	6.58	-0.0001	371	26.89	LYPLTK
P15280	Glucose-1-phosphate adenylyltransferase small subunit, chloroplastic/amyloplastic OS=Oryza sativa subsp. japonica GN=AGPS PE=2 SV=4	56468	34.8	6.58	0.0001	373	23.3	LYPLTK
P15280	Glucose-1-phosphate adenylyltransferase small subunit, chloroplastic/amyloplastic OS=Oryza sativa subsp. japonica GN=AGPS PE=2 SV=4	56468	34.8	6.58	0.0002	375	24.1	LYPLTK
P15280	Glucose-1-phosphate adenylyltransferase small subunit, chloroplastic/amyloplastic OS=Oryza sativa subsp. japonica GN=AGPS PE=2 SV=4	56468	34.8	6.58	0.0005	376	24.47	LYPLTK
P15280	Glucose-1-phosphate adenylyltransferase small subunit, chloroplastic/amyloplastic OS=Oryza sativa subsp. japonica GN=AGPS PE=2 SV=4	56468	34.8	6.58	0.0006	377	22.93	LYPLTK
P15280	Glucose-1-phosphate adenylyltransferase small subunit, chloroplastic/amyloplastic OS=Oryza sativa subsp. japonica GN=AGPS PE=2 SV=4	56468	34.8	6.58	-0.0002	1315	30.04	GGIPIGIGK
P15280	Glucose-1-phosphate adenylyltransferase small subunit, chloroplastic/amyloplastic OS=Oryza sativa subsp. japonica GN=AGPS PE=2 SV=4	56468	34.8	6.58	0	1317	21.83	GGIPIGIGK
P15280	Glucose-1-phosphate adenylyltransferase small subunit, chloroplastic/amyloplastic OS=Oryza sativa subsp. japonica GN=AGPS PE=2 SV=4	56468	34.8	6.58	0	1318	32.13	GGIPIGIGK
P15280	Glucose-1-phosphate adenylyltransferase small subunit, chloroplastic/amyloplastic OS=Oryza sativa subsp. japonica GN=AGPS PE=2 SV=4	56468	34.8	6.58	-0.0002	1393	21.01	SGIVTVIK
P15280	Glucose-1-phosphate adenylyltransferase small subunit, chloroplastic/amyloplastic OS=Oryza sativa subsp. japonica GN=AGPS PE=2 SV=4	56468	34.8	6.58	-0.0001	1395	23.64	SGIVTVIK
P15280	Glucose-1-phosphate adenylyltransferase small subunit, chloroplastic/amyloplastic OS=Oryza sativa subsp. japonica GN=AGPS PE=2 SV=4	56468	34.8	6.58	0.0002	1396	25.44	SGIVTVIK
P15280	Glucose-1-phosphate adenylyltransferase small subunit, chloroplastic/amyloplastic OS=Oryza sativa subsp. japonica GN=AGPS PE=2 SV=4	56468	34.8	6.58	0.0003	1887	33.85	ATAFGLMK
P15280	Glucose-1-phosphate adenylyltransferase small subunit, chloroplastic/amyloplastic OS=Oryza sativa subsp. japonica GN=AGPS PE=2 SV=4	56468	34.8	6.58	0.0004	3981	24.55	ETDGYFIK
P15280	Glucose-1-phosphate adenylyltransferase small subunit, chloroplastic/amyloplastic OS=Oryza sativa subsp. japonica GN=AGPS PE=2 SV=4	56468	34.8	6.58	0.0004	5230	21.28	SAPIYTQPR
P15280	Glucose-1-phosphate adenylyltransferase small subunit, chloroplastic/amyloplastic OS=Oryza sativa subsp. japonica GN=AGPS PE=2 SV=4	56468	34.8	6.58	0.0005	5231	27.54	SAPIYTQPR
P15280	Glucose-1-phosphate adenylyltransferase small subunit, chloroplastic/amyloplastic OS=Oryza sativa subsp. japonica GN=AGPS PE=2 SV=4	56468	34.8	6.58	0.0006	5232	23.78	SAPIYTQPR
P15280	Glucose-1-phosphate adenylyltransferase small subunit, chloroplastic/amyloplastic OS=Oryza sativa subsp. japonica GN=AGPS PE=2 SV=4	56468	34.8	6.58	0.0011	5234	25.99	SAPIYTQPR
P15280	Glucose-1-phosphate adenylyltransferase small subunit, chloroplastic/amyloplastic OS=Oryza sativa subsp. japonica GN=AGPS PE=2 SV=4	56468	34.8	6.58	0.0011	5235	26.17	SAPIYTQPR
P15280	Glucose-1-phosphate adenylyltransferase small subunit, chloroplastic/amyloplastic OS=Oryza sativa subsp. japonica GN=AGPS PE=2 SV=4	56468	34.8	6.58	0.0025	5240	20.57	SAPIYTQPR
P15280	Glucose-1-phosphate adenylyltransferase small subunit, chloroplastic/amyloplastic OS=Oryza sativa subsp. japonica GN=AGPS PE=2 SV=4	56468	34.8	6.58	0.0037	5247	25.42	SAPIYTQPR
P15280	Glucose-1-phosphate adenylyltransferase small subunit, chloroplastic/amyloplastic OS=Oryza sativa subsp. japonica GN=AGPS PE=2 SV=4	56468	34.8	6.58	-0.0014	5576	27.78	AYGNNIGGYK
P15280	Glucose-1-phosphate adenylyltransferase small subunit, chloroplastic/amyloplastic OS=Oryza sativa subsp. japonica GN=AGPS PE=2 SV=4	56468	34.8	6.58	0.0005	5584	23.76	AYGNNIGGYK
P15280	Glucose-1-phosphate adenylyltransferase small subunit, chloroplastic/amyloplastic OS=Oryza sativa subsp. japonica GN=AGPS PE=2 SV=4	56468	34.8	6.58	0.0007	5585	20.43	AYGNNIGGYK
P15280	Glucose-1-phosphate adenylyltransferase small subunit, chloroplastic/amyloplastic OS=Oryza sativa subsp. japonica GN=AGPS PE=2 SV=4	56468	34.8	6.58	-0.0012	5662	32.03	IVEFAEKPK
P15280	Glucose-1-phosphate adenylyltransferase small subunit, chloroplastic/amyloplastic OS=Oryza sativa subsp. japonica GN=AGPS PE=2 SV=4	56468	34.8	6.58	0.0001	5665	33.66	IVEFAEKPK
P15280	Glucose-1-phosphate adenylyltransferase small subunit, chloroplastic/amyloplastic OS=Oryza sativa subsp. japonica GN=AGPS PE=2 SV=4	56468	34.8	6.58	-0.0018	9370	38.1	AKPAVPLGANYR
P15280	Glucose-1-phosphate adenylyltransferase small subunit, chloroplastic/amyloplastic OS=Oryza sativa subsp. japonica GN=AGPS PE=2 SV=4	56468	34.8	6.58	-0.0016	9371	38.2	AKPAVPLGANYR
P15280	Glucose-1-phosphate adenylyltransferase small subunit, chloroplastic/amyloplastic OS=Oryza sativa subsp. japonica GN=AGPS PE=2 SV=4	56468	34.8	6.58	-0.0002	10947	48.76	IINVDNVQEAAR
P15280	Glucose-1-phosphate adenylyltransferase small subunit, chloroplastic/amyloplastic OS=Oryza sativa subsp. japonica GN=AGPS PE=2 SV=4	56468	34.8	6.58	0.0007	10948	87.12	IINVDNVQEAAR
P15280	Glucose-1-phosphate adenylyltransferase small subunit, chloroplastic/amyloplastic OS=Oryza sativa subsp. japonica GN=AGPS PE=2 SV=4	56468	34.8	6.58	0.001	10949	67.53	IINVDNVQEAAR
P15280	Glucose-1-phosphate adenylyltransferase small subunit, chloroplastic/amyloplastic OS=Oryza sativa subsp. japonica GN=AGPS PE=2 SV=4	56468	34.8	6.58	0.0013	10950	84.59	IINVDNVQEAAR
P15280	Glucose-1-phosphate adenylyltransferase small subunit, chloroplastic/amyloplastic OS=Oryza sativa subsp. japonica GN=AGPS PE=2 SV=4	56468	34.8	6.58	0.0017	10951	71.73	IINVDNVQEAAR
P15280	Glucose-1-phosphate adenylyltransferase small subunit, chloroplastic/amyloplastic OS=Oryza sativa subsp. japonica GN=AGPS PE=2 SV=4	56468	34.8	6.58	0.0024	10952	63.09	IINVDNVQEAAR
P15280	Glucose-1-phosphate adenylyltransferase small subunit, chloroplastic/amyloplastic OS=Oryza sativa subsp. japonica GN=AGPS PE=2 SV=4	56468	34.8	6.58	-0.0019	14090	62.08	AMMVDTTILGLDDVR
P15280	Glucose-1-phosphate adenylyltransferase small subunit, chloroplastic/amyloplastic OS=Oryza sativa subsp. japonica GN=AGPS PE=2 SV=4	56468	34.8	6.58	-0.0071	14592	29.71	ETDSDITVAALPMDEK
P15280	Glucose-1-phosphate adenylyltransferase small subunit, chloroplastic/amyloplastic OS=Oryza sativa subsp. japonica GN=AGPS PE=2 SV=4	56468	34.8	6.58	-0.0005	14593	45.78	ETDSDITVAALPMDEK
P15280	Glucose-1-phosphate adenylyltransferase small subunit, chloroplastic/amyloplastic OS=Oryza sativa subsp. japonica GN=AGPS PE=2 SV=4	56468	34.8	6.58	-0.0002	14594	35.52	ETDSDITVAALPMDEK
P15280	Glucose-1-phosphate adenylyltransferase small subunit, chloroplastic/amyloplastic OS=Oryza sativa subsp. japonica GN=AGPS PE=2 SV=4	56468	34.8	6.58	-0.0005	14737	22.96	ETDSDITVAALPMDEK
P15280	Glucose-1-phosphate adenylyltransferase small subunit, chloroplastic/amyloplastic OS=Oryza sativa subsp. japonica GN=AGPS PE=2 SV=4	56468	34.8	6.58	-0.0001	14738	32.38	ETDSDITVAALPMDEK
P15280	Glucose-1-phosphate adenylyltransferase small subunit, chloroplastic/amyloplastic OS=Oryza sativa subsp. japonica GN=AGPS PE=2 SV=4	56468	34.8	6.58	0.0006	14969	52.26	LIDIPVSNCLNSNISK
P15280	Glucose-1-phosphate adenylyltransferase small subunit, chloroplastic/amyloplastic OS=Oryza sativa subsp. japonica GN=AGPS PE=2 SV=4	56468	34.8	6.58	0.0007	14970	23.45	LIDIPVSNCLNSNISK
P15280	Glucose-1-phosphate adenylyltransferase small subunit, chloroplastic/amyloplastic OS=Oryza sativa subsp. japonica GN=AGPS PE=2 SV=4	56468	34.8	6.58	0.0058	14971	54.26	LIDIPVSNCLNSNISK
P15280	Glucose-1-phosphate adenylyltransferase small subunit, chloroplastic/amyloplastic OS=Oryza sativa subsp. japonica GN=AGPS PE=2 SV=4	56468	34.8	6.58	-0.0056	15341	53.51	VLDADVTDSVIGEGCVIK
P15280	Glucose-1-phosphate adenylyltransferase small subunit, chloroplastic/amyloplastic OS=Oryza sativa subsp. japonica GN=AGPS PE=2 SV=4	56468	34.8	6.58	0.0008	15342	87.33	VLDADVTDSVIGEGCVIK
P15280	Glucose-1-phosphate adenylyltransferase small subunit, chloroplastic/amyloplastic OS=Oryza sativa subsp. japonica GN=AGPS PE=2 SV=4	56468	34.8	6.58	-0.0006	16340	68.66	EQFPGANDFGSEVIPGATNIGMR
P15280	Glucose-1-phosphate adenylyltransferase small subunit, chloroplastic/amyloplastic OS=Oryza sativa subsp. japonica GN=AGPS PE=2 SV=4	56468	34.8	6.58	0.0004	16341	31.49	EQFPGANDFGSEVIPGATNIGMR
P15280	Glucose-1-phosphate adenylyltransferase small subunit, chloroplastic/amyloplastic OS=Oryza sativa subsp. japonica GN=AGPS PE=2 SV=4	56468	34.8	6.58	-0.0004	16360	46.09	EQFPGANDFGSEVIPGATNIGMR
Q0DEC8	Soluble starch synthase 1, chloroplastic/amyloplastic OS=Oryza sativa subsp. japonica GN=Os06g0160700 PE=1 SV=1	71477	21.5	5.89	-0.0004	924	32.93	GAVVTADR
Q0DEC8	Soluble starch synthase 1, chloroplastic/amyloplastic OS=Oryza sativa subsp. japonica GN=Os06g0160700 PE=1 SV=1	71477	21.5	5.89	-0.0002	925	24.8	GAVVTADR
Q0DEC8	Soluble starch synthase 1, chloroplastic/amyloplastic OS=Oryza sativa subsp. japonica GN=Os06g0160700 PE=1 SV=1	71477	21.5	5.89	0	931	22.91	GAVVTADR
Q0DEC8	Soluble starch synthase 1, chloroplastic/amyloplastic OS=Oryza sativa subsp. japonica GN=Os06g0160700 PE=1 SV=1	71477	21.5	5.89	-0.0001	1766	49.23	VMVVMPR
Q0DEC8	Soluble starch synthase 1, chloroplastic/amyloplastic OS=Oryza sativa subsp. japonica GN=Os06g0160700 PE=1 SV=1	71477	21.5	5.89	0.0001	1767	30.72	VMVVMPR
Q0DEC8	Soluble starch synthase 1, chloroplastic/amyloplastic OS=Oryza sativa subsp. japonica GN=Os06g0160700 PE=1 SV=1	71477	21.5	5.89	0.0003	1768	47.85	VMVVMPR
Q0DEC8	Soluble starch synthase 1, chloroplastic/amyloplastic OS=Oryza sativa subsp. japonica GN=Os06g0160700 PE=1 SV=1	71477	21.5	5.89	-0.0007	2544	23.84	GEAVNFLK
Q0DEC8	Soluble starch synthase 1, chloroplastic/amyloplastic OS=Oryza sativa subsp. japonica GN=Os06g0160700 PE=1 SV=1	71477	21.5	5.89	0.0018	2550	20.59	GEAVNFLK
Q0DEC8	Soluble starch synthase 1, chloroplastic/amyloplastic OS=Oryza sativa subsp. japonica GN=Os06g0160700 PE=1 SV=1	71477	21.5	5.89	0.0002	3195	53.36	LAIPDLMR
Q0DEC8	Soluble starch synthase 1, chloroplastic/amyloplastic OS=Oryza sativa subsp. japonica GN=Os06g0160700 PE=1 SV=1	71477	21.5	5.89	-0.0004	3317	23.81	SSWEGLMK
Q0DEC8	Soluble starch synthase 1, chloroplastic/amyloplastic OS=Oryza sativa subsp. japonica GN=Os06g0160700 PE=1 SV=1	71477	21.5	5.89	0	3318	32.77	SSWEGLMK
Q0DEC8	Soluble starch synthase 1, chloroplastic/amyloplastic OS=Oryza sativa subsp. japonica GN=Os06g0160700 PE=1 SV=1	71477	21.5	5.89	0.0001	8482	35.24	NFANAFYTEK
Q0DEC8	Soluble starch synthase 1, chloroplastic/amyloplastic OS=Oryza sativa subsp. japonica GN=Os06g0160700 PE=1 SV=1	71477	21.5	5.89	0.0013	8483	48.88	NFANAFYTEK
Q0DEC8	Soluble starch synthase 1, chloroplastic/amyloplastic OS=Oryza sativa subsp. japonica GN=Os06g0160700 PE=1 SV=1	71477	21.5	5.89	0.0003	12042	28.54	DTVENFNPFAEK
Q0DEC8	Soluble starch synthase 1, chloroplastic/amyloplastic OS=Oryza sativa subsp. japonica GN=Os06g0160700 PE=1 SV=1	71477	21.5	5.89	0.0012	12043	35.3	DTVENFNPFAEK
Q0DEC8	Soluble starch synthase 1, chloroplastic/amyloplastic OS=Oryza sativa subsp. japonica GN=Os06g0160700 PE=1 SV=1	71477	21.5	5.89	-0.0025	12386	45.66	ITAGCDILLMPSR
Q0DEC8	Soluble starch synthase 1, chloroplastic/amyloplastic OS=Oryza sativa subsp. japonica GN=Os06g0160700 PE=1 SV=1	71477	21.5	5.89	-0.0007	12387	58.52	ITAGCDILLMPSR
Q0DEC8	Soluble starch synthase 1, chloroplastic/amyloplastic OS=Oryza sativa subsp. japonica GN=Os06g0160700 PE=1 SV=1	71477	21.5	5.89	-0.0003	12388	64.77	ITAGCDILLMPSR
Q0DEC8	Soluble starch synthase 1, chloroplastic/amyloplastic OS=Oryza sativa subsp. japonica GN=Os06g0160700 PE=1 SV=1	71477	21.5	5.89	-0.0001	12389	80.54	ITAGCDILLMPSR
Q0DEC8	Soluble starch synthase 1, chloroplastic/amyloplastic OS=Oryza sativa subsp. japonica GN=Os06g0160700 PE=1 SV=1	71477	21.5	5.89	-0.0009	12459	42.25	SVVFVTGEASPYAK
Q0DEC8	Soluble starch synthase 1, chloroplastic/amyloplastic OS=Oryza sativa subsp. japonica GN=Os06g0160700 PE=1 SV=1	71477	21.5	5.89	-0.0003	12460	73.66	SVVFVTGEASPYAK
Q0DEC8	Soluble starch synthase 1, chloroplastic/amyloplastic OS=Oryza sativa subsp. japonica GN=Os06g0160700 PE=1 SV=1	71477	21.5	5.89	-0.0001	12461	92.05	SVVFVTGEASPYAK
Q0DEC8	Soluble starch synthase 1, chloroplastic/amyloplastic OS=Oryza sativa subsp. japonica GN=Os06g0160700 PE=1 SV=1	71477	21.5	5.89	0	12462	56.13	SVVFVTGEASPYAK
Q0DEC8	Soluble starch synthase 1, chloroplastic/amyloplastic OS=Oryza sativa subsp. japonica GN=Os06g0160700 PE=1 SV=1	71477	21.5	5.89	0.0001	12463	78.9	SVVFVTGEASPYAK
Q0DEC8	Soluble starch synthase 1, chloroplastic/amyloplastic OS=Oryza sativa subsp. japonica GN=Os06g0160700 PE=1 SV=1	71477	21.5	5.89	-0.0016	12551	67.45	ITAGCDILLMPSR
Q0DEC8	Soluble starch synthase 1, chloroplastic/amyloplastic OS=Oryza sativa subsp. japonica GN=Os06g0160700 PE=1 SV=1	71477	21.5	5.89	0.0035	12552	58.99	ITAGCDILLMPSR
Q0DEC8	Soluble starch synthase 1, chloroplastic/amyloplastic OS=Oryza sativa subsp. japonica GN=Os06g0160700 PE=1 SV=1	71477	21.5	5.89	-0.0004	13507	28.31	DGGSAQRPLAPAPLVK
Q0DEC8	Soluble starch synthase 1, chloroplastic/amyloplastic OS=Oryza sativa subsp. japonica GN=Os06g0160700 PE=1 SV=1	71477	21.5	5.89	-0.0004	13508	37.61	DGGSAQRPLAPAPLVK
Q0DEC8	Soluble starch synthase 1, chloroplastic/amyloplastic OS=Oryza sativa subsp. japonica GN=Os06g0160700 PE=1 SV=1	71477	21.5	5.89	-0.0002	13509	41.01	DGGSAQRPLAPAPLVK
Q0DEC8	Soluble starch synthase 1, chloroplastic/amyloplastic OS=Oryza sativa subsp. japonica GN=Os06g0160700 PE=1 SV=1	71477	21.5	5.89	0.0006	13510	24.19	DGGSAQRPLAPAPLVK
Q0DEC8	Soluble starch synthase 1, chloroplastic/amyloplastic OS=Oryza sativa subsp. japonica GN=Os06g0160700 PE=1 SV=1	71477	21.5	5.89	0.0015	13513	25.92	DGGSAQRPLAPAPLVK
Q0DEC8	Soluble starch synthase 1, chloroplastic/amyloplastic OS=Oryza sativa subsp. japonica GN=Os06g0160700 PE=1 SV=1	71477	21.5	5.89	0.0019	13514	27.34	DGGSAQRPLAPAPLVK
Q0DEC8	Soluble starch synthase 1, chloroplastic/amyloplastic OS=Oryza sativa subsp. japonica GN=Os06g0160700 PE=1 SV=1	71477	21.5	5.89	0.003	13515	32.92	DGGSAQRPLAPAPLVK
Q0DEC8	Soluble starch synthase 1, chloroplastic/amyloplastic OS=Oryza sativa subsp. japonica GN=Os06g0160700 PE=1 SV=1	71477	21.5	5.89	-0.0022	14457	38.49	GEQGTGWAFSPLTIEK
Q0DEC8	Soluble starch synthase 1, chloroplastic/amyloplastic OS=Oryza sativa subsp. japonica GN=Os06g0160700 PE=1 SV=1	71477	21.5	5.89	-0.0008	14458	86.47	GEQGTGWAFSPLTIEK
Q0DEC8	Soluble starch synthase 1, chloroplastic/amyloplastic OS=Oryza sativa subsp. japonica GN=Os06g0160700 PE=1 SV=1	71477	21.5	5.89	0.0012	14799	35.24	SGGLGDVCGSLPIALALR
Q0DEC8	Soluble starch synthase 1, chloroplastic/amyloplastic OS=Oryza sativa subsp. japonica GN=Os06g0160700 PE=1 SV=1	71477	21.5	5.89	0.0021	14800	80.4	SGGLGDVCGSLPIALALR
Q0DEC8	Soluble starch synthase 1, chloroplastic/amyloplastic OS=Oryza sativa subsp. japonica GN=Os06g0160700 PE=1 SV=1	71477	21.5	5.89	0.0043	14801	91.82	SGGLGDVCGSLPIALALR
Q0DEC8	Soluble starch synthase 1, chloroplastic/amyloplastic OS=Oryza sativa subsp. japonica GN=Os06g0160700 PE=1 SV=1	71477	21.5	5.89	0.0051	14802	69.7	SGGLGDVCGSLPIALALR
Q0DEC8	Soluble starch synthase 1, chloroplastic/amyloplastic OS=Oryza sativa subsp. japonica GN=Os06g0160700 PE=1 SV=1	71477	21.5	5.89	0.0101	14803	68.63	SGGLGDVCGSLPIALALR
Q5N725	Fructose-bisphosphate aldolase OS=Oryza sativa subsp. japonica GN=B1417F08.1-1 PE=2 SV=1	39141	34.4	8.35	0.0007	1598	38.86	VLAACYK
Q5N725	Fructose-bisphosphate aldolase OS=Oryza sativa subsp. japonica GN=B1417F08.1-1 PE=2 SV=1	39141	34.4	8.35	-0.0004	10580	90.26	VDKGTVEVAGTNK
Q5N725	Fructose-bisphosphate aldolase OS=Oryza sativa subsp. japonica GN=B1417F08.1-1 PE=2 SV=1	39141	34.4	8.35	0.0006	10581	20.61	VDKGTVEVAGTNK
Q5N725	Fructose-bisphosphate aldolase OS=Oryza sativa subsp. japonica GN=B1417F08.1-1 PE=2 SV=1	39141	34.4	8.35	-0.0015	11533	56.34	VSPQLIAEYTVR
Q5N725	Fructose-bisphosphate aldolase OS=Oryza sativa subsp. japonica GN=B1417F08.1-1 PE=2 SV=1	39141	34.4	8.35	-0.0008	15806	71.56	IGPNEPSQLSIDLNAQGLAR
Q5N725	Fructose-bisphosphate aldolase OS=Oryza sativa subsp. japonica GN=B1417F08.1-1 PE=2 SV=1	39141	34.4	8.35	0.0019	15807	101.93	IGPNEPSQLSIDLNAQGLAR
Q5N725	Fructose-bisphosphate aldolase OS=Oryza sativa subsp. japonica GN=B1417F08.1-1 PE=2 SV=1	39141	34.4	8.35	0.0028	15808	86.6	IGPNEPSQLSIDLNAQGLAR
Q5N725	Fructose-bisphosphate aldolase OS=Oryza sativa subsp. japonica GN=B1417F08.1-1 PE=2 SV=1	39141	34.4	8.35	0.0015	16459	76.57	ANSEATLGTYQGDAVLGEGASESLHVK
Q0D9D0	Os06g0726400 protein OS=Oryza sativa subsp. japonica GN=SBE1 PE=2 SV=1	93747	15.2	6.35	-0.0001	604	21.22	VIVFER
Q0D9D0	Os06g0726400 protein OS=Oryza sativa subsp. japonica GN=SBE1 PE=2 SV=1	93747	15.2	6.35	-0.0016	2031	29.58	VGCDLPGK
Q0D9D0	Os06g0726400 protein OS=Oryza sativa subsp. japonica GN=SBE1 PE=2 SV=1	93747	15.2	6.35	-0.0007	2032	32.36	VGCDLPGK
Q0D9D0	Os06g0726400 protein OS=Oryza sativa subsp. japonica GN=SBE1 PE=2 SV=1	93747	15.2	6.35	-0.0007	2033	35	VGCDLPGK
Q0D9D0	Os06g0726400 protein OS=Oryza sativa subsp. japonica GN=SBE1 PE=2 SV=1	93747	15.2	6.35	-0.0006	2034	52.95	VGCDLPGK
Q0D9D0	Os06g0726400 protein OS=Oryza sativa subsp. japonica GN=SBE1 PE=2 SV=1	93747	15.2	6.35	-0.0003	2035	45.74	VGCDLPGK
Q0D9D0	Os06g0726400 protein OS=Oryza sativa subsp. japonica GN=SBE1 PE=2 SV=1	93747	15.2	6.35	-0.0003	2036	37.52	VGCDLPGK
Q0D9D0	Os06g0726400 protein OS=Oryza sativa subsp. japonica GN=SBE1 PE=2 SV=1	93747	15.2	6.35	-0.0003	2037	28.72	VGCDLPGK
Q0D9D0	Os06g0726400 protein OS=Oryza sativa subsp. japonica GN=SBE1 PE=2 SV=1	93747	15.2	6.35	0	2039	42.01	VGCDLPGK
Q0D9D0	Os06g0726400 protein OS=Oryza sativa subsp. japonica GN=SBE1 PE=2 SV=1	93747	15.2	6.35	-0.0002	2057	29.03	SGTPEDLK
Q0D9D0	Os06g0726400 protein OS=Oryza sativa subsp. japonica GN=SBE1 PE=2 SV=1	93747	15.2	6.35	0.0002	2688	56.83	LAMAIPDR
Q0D9D0	Os06g0726400 protein OS=Oryza sativa subsp. japonica GN=SBE1 PE=2 SV=1	93747	15.2	6.35	0.0003	2689	62.17	LAMAIPDR
Q0D9D0	Os06g0726400 protein OS=Oryza sativa subsp. japonica GN=SBE1 PE=2 SV=1	93747	15.2	6.35	-0.0004	2819	61.82	YATFDASK
Q0D9D0	Os06g0726400 protein OS=Oryza sativa subsp. japonica GN=SBE1 PE=2 SV=1	93747	15.2	6.35	0.0001	2820	68.03	YATFDASK
Q0D9D0	Os06g0726400 protein OS=Oryza sativa subsp. japonica GN=SBE1 PE=2 SV=1	93747	15.2	6.35	0.0002	2821	25.51	YATFDASK
Q0D9D0	Os06g0726400 protein OS=Oryza sativa subsp. japonica GN=SBE1 PE=2 SV=1	93747	15.2	6.35	0.0015	2825	41.3	YATFDASK
Q0D9D0	Os06g0726400 protein OS=Oryza sativa subsp. japonica GN=SBE1 PE=2 SV=1	93747	15.2	6.35	-0.0008	2832	37.93	LAMAIPDR
Q0D9D0	Os06g0726400 protein OS=Oryza sativa subsp. japonica GN=SBE1 PE=2 SV=1	93747	15.2	6.35	-0.0004	2833	32.45	LAMAIPDR
Q0D9D0	Os06g0726400 protein OS=Oryza sativa subsp. japonica GN=SBE1 PE=2 SV=1	93747	15.2	6.35	-0.0004	2834	33.83	LAMAIPDR
Q0D9D0	Os06g0726400 protein OS=Oryza sativa subsp. japonica GN=SBE1 PE=2 SV=1	93747	15.2	6.35	0	2835	50.84	LAMAIPDR
Q0D9D0	Os06g0726400 protein OS=Oryza sativa subsp. japonica GN=SBE1 PE=2 SV=1	93747	15.2	6.35	0.0001	2836	20.43	LAMAIPDR
Q0D9D0	Os06g0726400 protein OS=Oryza sativa subsp. japonica GN=SBE1 PE=2 SV=1	93747	15.2	6.35	0.0003	2837	43.65	LAMAIPDR
Q0D9D0	Os06g0726400 protein OS=Oryza sativa subsp. japonica GN=SBE1 PE=2 SV=1	93747	15.2	6.35	0.0011	2839	27	LAMAIPDR
Q0D9D0	Os06g0726400 protein OS=Oryza sativa subsp. japonica GN=SBE1 PE=2 SV=1	93747	15.2	6.35	0.0011	2840	31.76	LAMAIPDR
Q0D9D0	Os06g0726400 protein OS=Oryza sativa subsp. japonica GN=SBE1 PE=2 SV=1	93747	15.2	6.35	-0.0003	3219	22.85	TCVAYYR
Q0D9D0	Os06g0726400 protein OS=Oryza sativa subsp. japonica GN=SBE1 PE=2 SV=1	93747	15.2	6.35	-0.0003	3220	25.2	TCVAYYR
Q0D9D0	Os06g0726400 protein OS=Oryza sativa subsp. japonica GN=SBE1 PE=2 SV=1	93747	15.2	6.35	-0.0001	3222	23.76	TCVAYYR
Q0D9D0	Os06g0726400 protein OS=Oryza sativa subsp. japonica GN=SBE1 PE=2 SV=1	93747	15.2	6.35	-0.0001	3223	22.75	TCVAYYR
Q0D9D0	Os06g0726400 protein OS=Oryza sativa subsp. japonica GN=SBE1 PE=2 SV=1	93747	15.2	6.35	-0.0001	3224	22.5	TCVAYYR
Q0D9D0	Os06g0726400 protein OS=Oryza sativa subsp. japonica GN=SBE1 PE=2 SV=1	93747	15.2	6.35	0	3225	27.75	TCVAYYR
Q0D9D0	Os06g0726400 protein OS=Oryza sativa subsp. japonica GN=SBE1 PE=2 SV=1	93747	15.2	6.35	0	3226	25.81	TCVAYYR
Q0D9D0	Os06g0726400 protein OS=Oryza sativa subsp. japonica GN=SBE1 PE=2 SV=1	93747	15.2	6.35	0	3227	22.24	TCVAYYR
Q0D9D0	Os06g0726400 protein OS=Oryza sativa subsp. japonica GN=SBE1 PE=2 SV=1	93747	15.2	6.35	0	3228	21.42	TCVAYYR
Q0D9D0	Os06g0726400 protein OS=Oryza sativa subsp. japonica GN=SBE1 PE=2 SV=1	93747	15.2	6.35	0.0001	3231	22.57	TCVAYYR
Q0D9D0	Os06g0726400 protein OS=Oryza sativa subsp. japonica GN=SBE1 PE=2 SV=1	93747	15.2	6.35	0.0001	3233	24.65	TCVAYYR
Q0D9D0	Os06g0726400 protein OS=Oryza sativa subsp. japonica GN=SBE1 PE=2 SV=1	93747	15.2	6.35	0.0002	3234	22	TCVAYYR
Q0D9D0	Os06g0726400 protein OS=Oryza sativa subsp. japonica GN=SBE1 PE=2 SV=1	93747	15.2	6.35	0.0003	3235	24.64	TCVAYYR
Q0D9D0	Os06g0726400 protein OS=Oryza sativa subsp. japonica GN=SBE1 PE=2 SV=1	93747	15.2	6.35	0.0003	3236	26.23	TCVAYYR
Q0D9D0	Os06g0726400 protein OS=Oryza sativa subsp. japonica GN=SBE1 PE=2 SV=1	93747	15.2	6.35	0.0003	3237	25.32	TCVAYYR
Q0D9D0	Os06g0726400 protein OS=Oryza sativa subsp. japonica GN=SBE1 PE=2 SV=1	93747	15.2	6.35	0.0005	3238	33.6	TCVAYYR
Q0D9D0	Os06g0726400 protein OS=Oryza sativa subsp. japonica GN=SBE1 PE=2 SV=1	93747	15.2	6.35	0.0005	3239	25.57	TCVAYYR
Q0D9D0	Os06g0726400 protein OS=Oryza sativa subsp. japonica GN=SBE1 PE=2 SV=1	93747	15.2	6.35	0.0005	3240	21.79	TCVAYYR
Q0D9D0	Os06g0726400 protein OS=Oryza sativa subsp. japonica GN=SBE1 PE=2 SV=1	93747	15.2	6.35	0.0006	3242	34.73	TCVAYYR
Q0D9D0	Os06g0726400 protein OS=Oryza sativa subsp. japonica GN=SBE1 PE=2 SV=1	93747	15.2	6.35	0.0006	3243	22.45	TCVAYYR
Q0D9D0	Os06g0726400 protein OS=Oryza sativa subsp. japonica GN=SBE1 PE=2 SV=1	93747	15.2	6.35	0.0007	3244	33.14	TCVAYYR
Q0D9D0	Os06g0726400 protein OS=Oryza sativa subsp. japonica GN=SBE1 PE=2 SV=1	93747	15.2	6.35	0.0007	3245	33.66	TCVAYYR
Q0D9D0	Os06g0726400 protein OS=Oryza sativa subsp. japonica GN=SBE1 PE=2 SV=1	93747	15.2	6.35	0.0008	3246	33.25	TCVAYYR
Q0D9D0	Os06g0726400 protein OS=Oryza sativa subsp. japonica GN=SBE1 PE=2 SV=1	93747	15.2	6.35	0.0008	3247	33.83	TCVAYYR
Q0D9D0	Os06g0726400 protein OS=Oryza sativa subsp. japonica GN=SBE1 PE=2 SV=1	93747	15.2	6.35	0.0009	3248	29.17	TCVAYYR
Q0D9D0	Os06g0726400 protein OS=Oryza sativa subsp. japonica GN=SBE1 PE=2 SV=1	93747	15.2	6.35	0.0009	3249	21.29	TCVAYYR
Q0D9D0	Os06g0726400 protein OS=Oryza sativa subsp. japonica GN=SBE1 PE=2 SV=1	93747	15.2	6.35	0.0009	3250	33.49	TCVAYYR
Q0D9D0	Os06g0726400 protein OS=Oryza sativa subsp. japonica GN=SBE1 PE=2 SV=1	93747	15.2	6.35	0.0021	3252	33.19	TCVAYYR
Q0D9D0	Os06g0726400 protein OS=Oryza sativa subsp. japonica GN=SBE1 PE=2 SV=1	93747	15.2	6.35	0.0005	5887	29.27	QIVSDMNEK
Q0D9D0	Os06g0726400 protein OS=Oryza sativa subsp. japonica GN=SBE1 PE=2 SV=1	93747	15.2	6.35	-0.0008	7088	29.07	HEGGLEEFSK
Q0D9D0	Os06g0726400 protein OS=Oryza sativa subsp. japonica GN=SBE1 PE=2 SV=1	93747	15.2	6.35	-0.0009	7711	24.08	VDEDREELR
Q0D9D0	Os06g0726400 protein OS=Oryza sativa subsp. japonica GN=SBE1 PE=2 SV=1	93747	15.2	6.35	0.0009	7714	24.42	VDEDREELR
Q0D9D0	Os06g0726400 protein OS=Oryza sativa subsp. japonica GN=SBE1 PE=2 SV=1	93747	15.2	6.35	-0.001	10663	48.41	QIVSDMNEKDK
Q0D9D0	Os06g0726400 protein OS=Oryza sativa subsp. japonica GN=SBE1 PE=2 SV=1	93747	15.2	6.35	0.0012	10664	39.17	QIVSDMNEKDK
Q0D9D0	Os06g0726400 protein OS=Oryza sativa subsp. japonica GN=SBE1 PE=2 SV=1	93747	15.2	6.35	-0.0002	12228	38.92	FGINTVDGATIYR
Q0D9D0	Os06g0726400 protein OS=Oryza sativa subsp. japonica GN=SBE1 PE=2 SV=1	93747	15.2	6.35	0.0008	12229	54.52	FGINTVDGATIYR
Q0D9D0	Os06g0726400 protein OS=Oryza sativa subsp. japonica GN=SBE1 PE=2 SV=1	93747	15.2	6.35	-0.0029	15613	86.44	EMYTGMSDLQPASPTINR
Q0D9D0	Os06g0726400 protein OS=Oryza sativa subsp. japonica GN=SBE1 PE=2 SV=1	93747	15.2	6.35	-0.0012	15614	82.97	EMYTGMSDLQPASPTINR
Q0D9D0	Os06g0726400 protein OS=Oryza sativa subsp. japonica GN=SBE1 PE=2 SV=1	93747	15.2	6.35	-0.0008	15648	75.23	EMYTGMSDLQPASPTINR
Q0D9D0	Os06g0726400 protein OS=Oryza sativa subsp. japonica GN=SBE1 PE=2 SV=1	93747	15.2	6.35	0.0033	15649	87.33	EMYTGMSDLQPASPTINR
Q0D9D0	Os06g0726400 protein OS=Oryza sativa subsp. japonica GN=SBE1 PE=2 SV=1	93747	15.2	6.35	0.0034	15650	64.88	EMYTGMSDLQPASPTINR
Q0D9D0	Os06g0726400 protein OS=Oryza sativa subsp. japonica GN=SBE1 PE=2 SV=1	93747	15.2	6.35	-0.0076	15939	80.09	IYEAHVGMSGEEPEVSTYR
Q0D9D0	Os06g0726400 protein OS=Oryza sativa subsp. japonica GN=SBE1 PE=2 SV=1	93747	15.2	6.35	-0.0048	15940	59.71	IYEAHVGMSGEEPEVSTYR
Q0D9D0	Os06g0726400 protein OS=Oryza sativa subsp. japonica GN=SBE1 PE=2 SV=1	93747	15.2	6.35	0.0001	15994	45	IYEAHVGMSGEEPEVSTYR
Q0D9D0	Os06g0726400 protein OS=Oryza sativa subsp. japonica GN=SBE1 PE=2 SV=1	93747	15.2	6.35	0.0036	15995	55.91	IYEAHVGMSGEEPEVSTYR
Q6KA29	Os02g0250600 protein OS=Oryza sativa subsp. japonica GN=OJ1113_G05.23 PE=4 SV=1	47344	31.2	6.4	0	6234	48.44	VAAGTATDYAR
Q6KA29	Os02g0250600 protein OS=Oryza sativa subsp. japonica GN=OJ1113_G05.23 PE=4 SV=1	47344	31.2	6.4	0.0001	6235	59.56	VAAGTATDYAR
Q6KA29	Os02g0250600 protein OS=Oryza sativa subsp. japonica GN=OJ1113_G05.23 PE=4 SV=1	47344	31.2	6.4	0.0002	6236	47.3	VAAGTATDYAR
Q6KA29	Os02g0250600 protein OS=Oryza sativa subsp. japonica GN=OJ1113_G05.23 PE=4 SV=1	47344	31.2	6.4	0.0002	6237	65.23	VAAGTATDYAR
Q6KA29	Os02g0250600 protein OS=Oryza sativa subsp. japonica GN=OJ1113_G05.23 PE=4 SV=1	47344	31.2	6.4	0.0004	6238	45.97	VAAGTATDYAR
Q6KA29	Os02g0250600 protein OS=Oryza sativa subsp. japonica GN=OJ1113_G05.23 PE=4 SV=1	47344	31.2	6.4	0.0005	6239	56.65	VAAGTATDYAR
Q6KA29	Os02g0250600 protein OS=Oryza sativa subsp. japonica GN=OJ1113_G05.23 PE=4 SV=1	47344	31.2	6.4	0.0016	7468	51.6	AETGGQEGVTAK
Q6KA29	Os02g0250600 protein OS=Oryza sativa subsp. japonica GN=OJ1113_G05.23 PE=4 SV=1	47344	31.2	6.4	-0.0002	9250	30.91	DVTLSTGGTAAEK
Q6KA29	Os02g0250600 protein OS=Oryza sativa subsp. japonica GN=OJ1113_G05.23 PE=4 SV=1	47344	31.2	6.4	-0.0005	10400	53.5	TTAEYTQQAAVK
Q6KA29	Os02g0250600 protein OS=Oryza sativa subsp. japonica GN=OJ1113_G05.23 PE=4 SV=1	47344	31.2	6.4	-0.0005	10401	42.83	TTAEYTQQAAVK
Q6KA29	Os02g0250600 protein OS=Oryza sativa subsp. japonica GN=OJ1113_G05.23 PE=4 SV=1	47344	31.2	6.4	-0.0004	10402	58.44	TTAEYTQQAAVK
Q6KA29	Os02g0250600 protein OS=Oryza sativa subsp. japonica GN=OJ1113_G05.23 PE=4 SV=1	47344	31.2	6.4	0	10403	52.24	TTAEYTQQAAVK
Q6KA29	Os02g0250600 protein OS=Oryza sativa subsp. japonica GN=OJ1113_G05.23 PE=4 SV=1	47344	31.2	6.4	0.0001	10404	53.24	TTAEYTQQAAVK
Q6KA29	Os02g0250600 protein OS=Oryza sativa subsp. japonica GN=OJ1113_G05.23 PE=4 SV=1	47344	31.2	6.4	0.0006	10405	28.31	TTAEYTQQAAVK
Q6KA29	Os02g0250600 protein OS=Oryza sativa subsp. japonica GN=OJ1113_G05.23 PE=4 SV=1	47344	31.2	6.4	-0.0034	10652	44.76	DTTSDTTGGMAHK
Q6KA29	Os02g0250600 protein OS=Oryza sativa subsp. japonica GN=OJ1113_G05.23 PE=4 SV=1	47344	31.2	6.4	0.0001	10654	41.05	DTTSDTTGGMAHK
Q6KA29	Os02g0250600 protein OS=Oryza sativa subsp. japonica GN=OJ1113_G05.23 PE=4 SV=1	47344	31.2	6.4	-0.0014	10822	40.91	AQAQQNSMDAIR
Q6KA29	Os02g0250600 protein OS=Oryza sativa subsp. japonica GN=OJ1113_G05.23 PE=4 SV=1	47344	31.2	6.4	0.0036	10823	39.74	AQAQQNSMDAIR
Q6KA29	Os02g0250600 protein OS=Oryza sativa subsp. japonica GN=OJ1113_G05.23 PE=4 SV=1	47344	31.2	6.4	-0.0023	11573	37.01	QQHGEPDAAGAAAR
Q6KA29	Os02g0250600 protein OS=Oryza sativa subsp. japonica GN=OJ1113_G05.23 PE=4 SV=1	47344	31.2	6.4	-0.0009	11943	76.13	AADGAEEPSSGTADK
Q6KA29	Os02g0250600 protein OS=Oryza sativa subsp. japonica GN=OJ1113_G05.23 PE=4 SV=1	47344	31.2	6.4	0.0013	12342	40.02	GIVAGEEELVPVTK
Q6KA29	Os02g0250600 protein OS=Oryza sativa subsp. japonica GN=OJ1113_G05.23 PE=4 SV=1	47344	31.2	6.4	-0.0006	12592	31.75	DVALSTGGTASEYAK
Q6KA29	Os02g0250600 protein OS=Oryza sativa subsp. japonica GN=OJ1113_G05.23 PE=4 SV=1	47344	31.2	6.4	0.0027	12593	79.81	DVALSTGGTASEYAK
Q6KA29	Os02g0250600 protein OS=Oryza sativa subsp. japonica GN=OJ1113_G05.23 PE=4 SV=1	47344	31.2	6.4	0.0024	12938	78.35	TSDTIAQAGHGAGEAK
Q338N8	Alanine aminotransferase OS=Oryza sativa subsp. japonica GN=Os10g0390500 PE=2 SV=1	53130	30.2	6.23	-0.0005	703	47.51	IPAIISR
Q338N8	Alanine aminotransferase OS=Oryza sativa subsp. japonica GN=Os10g0390500 PE=2 SV=1	53130	30.2	6.23	-0.0005	704	35.64	IPAIISR
Q338N8	Alanine aminotransferase OS=Oryza sativa subsp. japonica GN=Os10g0390500 PE=2 SV=1	53130	30.2	6.23	-0.0002	705	45.28	IPAIISR
Q338N8	Alanine aminotransferase OS=Oryza sativa subsp. japonica GN=Os10g0390500 PE=2 SV=1	53130	30.2	6.23	0.0001	706	24.08	IPAIISR
Q338N8	Alanine aminotransferase OS=Oryza sativa subsp. japonica GN=Os10g0390500 PE=2 SV=1	53130	30.2	6.23	-0.0014	3487	37.11	DAIAAGIASR
Q338N8	Alanine aminotransferase OS=Oryza sativa subsp. japonica GN=Os10g0390500 PE=2 SV=1	53130	30.2	6.23	-0.0007	3488	26.41	DAIAAGIASR
Q338N8	Alanine aminotransferase OS=Oryza sativa subsp. japonica GN=Os10g0390500 PE=2 SV=1	53130	30.2	6.23	-0.0006	3489	40.64	DAIAAGIASR
Q338N8	Alanine aminotransferase OS=Oryza sativa subsp. japonica GN=Os10g0390500 PE=2 SV=1	53130	30.2	6.23	-0.0005	3490	29.5	DAIAAGIASR
Q338N8	Alanine aminotransferase OS=Oryza sativa subsp. japonica GN=Os10g0390500 PE=2 SV=1	53130	30.2	6.23	-0.0003	3491	32.5	DAIAAGIASR
Q338N8	Alanine aminotransferase OS=Oryza sativa subsp. japonica GN=Os10g0390500 PE=2 SV=1	53130	30.2	6.23	-0.0001	3492	37.78	DAIAAGIASR
Q338N8	Alanine aminotransferase OS=Oryza sativa subsp. japonica GN=Os10g0390500 PE=2 SV=1	53130	30.2	6.23	0.0005	3494	21.58	DAIAAGIASR
Q338N8	Alanine aminotransferase OS=Oryza sativa subsp. japonica GN=Os10g0390500 PE=2 SV=1	53130	30.2	6.23	-0.0006	3991	24.46	DGILQSLAR
Q338N8	Alanine aminotransferase OS=Oryza sativa subsp. japonica GN=Os10g0390500 PE=2 SV=1	53130	30.2	6.23	0.0008	5046	36.36	APDAFYALR
Q338N8	Alanine aminotransferase OS=Oryza sativa subsp. japonica GN=Os10g0390500 PE=2 SV=1	53130	30.2	6.23	0.0003	5228	62.63	AGDASYASYK
Q338N8	Alanine aminotransferase OS=Oryza sativa subsp. japonica GN=Os10g0390500 PE=2 SV=1	53130	30.2	6.23	0.0009	5796	34.31	SLFSADAISR
Q338N8	Alanine aminotransferase OS=Oryza sativa subsp. japonica GN=Os10g0390500 PE=2 SV=1	53130	30.2	6.23	-0.0004	6310	26.24	ATTILASIPGR
Q338N8	Alanine aminotransferase OS=Oryza sativa subsp. japonica GN=Os10g0390500 PE=2 SV=1	53130	30.2	6.23	0.0001	6901	46.26	VLNCEYAVR
Q338N8	Alanine aminotransferase OS=Oryza sativa subsp. japonica GN=Os10g0390500 PE=2 SV=1	53130	30.2	6.23	0.0007	6905	27.38	VLNCEYAVR
Q338N8	Alanine aminotransferase OS=Oryza sativa subsp. japonica GN=Os10g0390500 PE=2 SV=1	53130	30.2	6.23	0.0018	8719	22.15	ATGAYSHSQGIK
Q338N8	Alanine aminotransferase OS=Oryza sativa subsp. japonica GN=Os10g0390500 PE=2 SV=1	53130	30.2	6.23	-0.0003	10892	48.63	AAPSVAVDNLNPK
Q338N8	Alanine aminotransferase OS=Oryza sativa subsp. japonica GN=Os10g0390500 PE=2 SV=1	53130	30.2	6.23	-0.0002	10893	47.78	AAPSVAVDNLNPK
Q338N8	Alanine aminotransferase OS=Oryza sativa subsp. japonica GN=Os10g0390500 PE=2 SV=1	53130	30.2	6.23	-0.0001	10894	84.73	AAPSVAVDNLNPK
Q338N8	Alanine aminotransferase OS=Oryza sativa subsp. japonica GN=Os10g0390500 PE=2 SV=1	53130	30.2	6.23	0.0001	10895	85.94	AAPSVAVDNLNPK
Q338N8	Alanine aminotransferase OS=Oryza sativa subsp. japonica GN=Os10g0390500 PE=2 SV=1	53130	30.2	6.23	0.0002	10896	85.38	AAPSVAVDNLNPK
Q338N8	Alanine aminotransferase OS=Oryza sativa subsp. japonica GN=Os10g0390500 PE=2 SV=1	53130	30.2	6.23	-0.0024	12742	61.58	GGYMEITGFSAPVR
Q338N8	Alanine aminotransferase OS=Oryza sativa subsp. japonica GN=Os10g0390500 PE=2 SV=1	53130	30.2	6.23	-0.0003	12843	37.15	GGYMEITGFSAPVR
Q338N8	Alanine aminotransferase OS=Oryza sativa subsp. japonica GN=Os10g0390500 PE=2 SV=1	53130	30.2	6.23	-0.0034	14930	50.23	ALENAFNSLEGITCNK
Q338N8	Alanine aminotransferase OS=Oryza sativa subsp. japonica GN=Os10g0390500 PE=2 SV=1	53130	30.2	6.23	-0.0023	15195	62.9	TEGAMYLFPQLSLPQK
Q9AUV8	Phosphorylase OS=Oryza sativa subsp. japonica GN=OSJNBa0040E01.3 PE=3 SV=1	106613	11.6	5.64	-0.001	19	30.67	ILIDVK
Q9AUV8	Phosphorylase OS=Oryza sativa subsp. japonica GN=OSJNBa0040E01.3 PE=3 SV=1	106613	11.6	5.64	-0.0003	20	57.56	ILIDVK
Q9AUV8	Phosphorylase OS=Oryza sativa subsp. japonica GN=OSJNBa0040E01.3 PE=3 SV=1	106613	11.6	5.64	-0.0001	21	52.47	ILIDVK
Q9AUV8	Phosphorylase OS=Oryza sativa subsp. japonica GN=OSJNBa0040E01.3 PE=3 SV=1	106613	11.6	5.64	0.0006	22	48.54	ILIDVK
Q9AUV8	Phosphorylase OS=Oryza sativa subsp. japonica GN=OSJNBa0040E01.3 PE=3 SV=1	106613	11.6	5.64	-0.0006	818	30.55	VCIFGGK
Q9AUV8	Phosphorylase OS=Oryza sativa subsp. japonica GN=OSJNBa0040E01.3 PE=3 SV=1	106613	11.6	5.64	-0.0004	819	26.83	VCIFGGK
Q9AUV8	Phosphorylase OS=Oryza sativa subsp. japonica GN=OSJNBa0040E01.3 PE=3 SV=1	106613	11.6	5.64	-0.002	1262	34.64	FEEVKR
Q9AUV8	Phosphorylase OS=Oryza sativa subsp. japonica GN=OSJNBa0040E01.3 PE=3 SV=1	106613	11.6	5.64	-0.0004	1787	24.18	INSFVPR
Q9AUV8	Phosphorylase OS=Oryza sativa subsp. japonica GN=OSJNBa0040E01.3 PE=3 SV=1	106613	11.6	5.64	0.0002	1788	50.45	INSFVPR
Q9AUV8	Phosphorylase OS=Oryza sativa subsp. japonica GN=OSJNBa0040E01.3 PE=3 SV=1	106613	11.6	5.64	0.0003	1789	68.85	INSFVPR
Q9AUV8	Phosphorylase OS=Oryza sativa subsp. japonica GN=OSJNBa0040E01.3 PE=3 SV=1	106613	11.6	5.64	0.0006	1790	43.68	INSFVPR
Q9AUV8	Phosphorylase OS=Oryza sativa subsp. japonica GN=OSJNBa0040E01.3 PE=3 SV=1	106613	11.6	5.64	-0.0001	2963	37.93	TDVSYPVK
Q9AUV8	Phosphorylase OS=Oryza sativa subsp. japonica GN=OSJNBa0040E01.3 PE=3 SV=1	106613	11.6	5.64	0	2964	26.15	TDVSYPVK
Q9AUV8	Phosphorylase OS=Oryza sativa subsp. japonica GN=OSJNBa0040E01.3 PE=3 SV=1	106613	11.6	5.64	0	2965	20.98	TDVSYPVK
Q9AUV8	Phosphorylase OS=Oryza sativa subsp. japonica GN=OSJNBa0040E01.3 PE=3 SV=1	106613	11.6	5.64	0.0002	2966	45.3	TDVSYPVK
Q9AUV8	Phosphorylase OS=Oryza sativa subsp. japonica GN=OSJNBa0040E01.3 PE=3 SV=1	106613	11.6	5.64	0.0009	2968	25.96	TDVSYPVK
Q9AUV8	Phosphorylase OS=Oryza sativa subsp. japonica GN=OSJNBa0040E01.3 PE=3 SV=1	106613	11.6	5.64	0.0002	4538	44.22	AFATYVQAK
Q9AUV8	Phosphorylase OS=Oryza sativa subsp. japonica GN=OSJNBa0040E01.3 PE=3 SV=1	106613	11.6	5.64	0.002	4539	41.66	AFATYVQAK
Q9AUV8	Phosphorylase OS=Oryza sativa subsp. japonica GN=OSJNBa0040E01.3 PE=3 SV=1	106613	11.6	5.64	0.0003	6987	35.91	YGTEDTSLLK
Q9AUV8	Phosphorylase OS=Oryza sativa subsp. japonica GN=OSJNBa0040E01.3 PE=3 SV=1	106613	11.6	5.64	0.0004	6988	21.31	YGTEDTSLLK
Q9AUV8	Phosphorylase OS=Oryza sativa subsp. japonica GN=OSJNBa0040E01.3 PE=3 SV=1	106613	11.6	5.64	0.0006	6990	25.15	YGTEDTSLLK
Q9AUV8	Phosphorylase OS=Oryza sativa subsp. japonica GN=OSJNBa0040E01.3 PE=3 SV=1	106613	11.6	5.64	0.0009	6991	40.26	YGTEDTSLLK
Q9AUV8	Phosphorylase OS=Oryza sativa subsp. japonica GN=OSJNBa0040E01.3 PE=3 SV=1	106613	11.6	5.64	-0.001	7240	62.68	MSILNTASSSK
Q9AUV8	Phosphorylase OS=Oryza sativa subsp. japonica GN=OSJNBa0040E01.3 PE=3 SV=1	106613	11.6	5.64	-0.0003	7241	29.3	MSILNTASSSK
Q9AUV8	Phosphorylase OS=Oryza sativa subsp. japonica GN=OSJNBa0040E01.3 PE=3 SV=1	106613	11.6	5.64	0.0003	7242	43.37	MSILNTASSSK
Q9AUV8	Phosphorylase OS=Oryza sativa subsp. japonica GN=OSJNBa0040E01.3 PE=3 SV=1	106613	11.6	5.64	0.0006	7243	38.28	MSILNTASSSK
Q9AUV8	Phosphorylase OS=Oryza sativa subsp. japonica GN=OSJNBa0040E01.3 PE=3 SV=1	106613	11.6	5.64	0.0011	7245	21.52	MSILNTASSSK
Q9AUV8	Phosphorylase OS=Oryza sativa subsp. japonica GN=OSJNBa0040E01.3 PE=3 SV=1	106613	11.6	5.64	0.0007	7584	49.46	MSILNTASSSK
Q9AUV8	Phosphorylase OS=Oryza sativa subsp. japonica GN=OSJNBa0040E01.3 PE=3 SV=1	106613	11.6	5.64	0	8706	38.77	SLEPSVVVEEK
Q9AUV8	Phosphorylase OS=Oryza sativa subsp. japonica GN=OSJNBa0040E01.3 PE=3 SV=1	106613	11.6	5.64	0.0003	8707	43.89	SLEPSVVVEEK
Q9AUV8	Phosphorylase OS=Oryza sativa subsp. japonica GN=OSJNBa0040E01.3 PE=3 SV=1	106613	11.6	5.64	0.0003	8708	53.52	SLEPSVVVEEK
Q9AUV8	Phosphorylase OS=Oryza sativa subsp. japonica GN=OSJNBa0040E01.3 PE=3 SV=1	106613	11.6	5.64	0.0004	8709	50.56	SLEPSVVVEEK
Q9AUV8	Phosphorylase OS=Oryza sativa subsp. japonica GN=OSJNBa0040E01.3 PE=3 SV=1	106613	11.6	5.64	0.0018	8710	30.02	SLEPSVVVEEK
Q9AUV8	Phosphorylase OS=Oryza sativa subsp. japonica GN=OSJNBa0040E01.3 PE=3 SV=1	106613	11.6	5.64	0.0025	8711	40.53	SLEPSVVVEEK
Q9AUV8	Phosphorylase OS=Oryza sativa subsp. japonica GN=OSJNBa0040E01.3 PE=3 SV=1	106613	11.6	5.64	-0.0004	10388	21.64	VVAHDIPIPGYK
Q9AUV8	Phosphorylase OS=Oryza sativa subsp. japonica GN=OSJNBa0040E01.3 PE=3 SV=1	106613	11.6	5.64	-0.001	12096	38.54	DFPSYIECQEK
Q9AUV8	Phosphorylase OS=Oryza sativa subsp. japonica GN=OSJNBa0040E01.3 PE=3 SV=1	106613	11.6	5.64	-0.0002	12097	34.27	DFPSYIECQEK
Q9AUV8	Phosphorylase OS=Oryza sativa subsp. japonica GN=OSJNBa0040E01.3 PE=3 SV=1	106613	11.6	5.64	0.0004	12098	45.12	DFPSYIECQEK
Q9AUV8	Phosphorylase OS=Oryza sativa subsp. japonica GN=OSJNBa0040E01.3 PE=3 SV=1	106613	11.6	5.64	0.0009	12099	26.07	DFPSYIECQEK
Q9AUV8	Phosphorylase OS=Oryza sativa subsp. japonica GN=OSJNBa0040E01.3 PE=3 SV=1	106613	11.6	5.64	-0.0003	12914	85.36	FADDEDLQSEWR
Q9AUV8	Phosphorylase OS=Oryza sativa subsp. japonica GN=OSJNBa0040E01.3 PE=3 SV=1	106613	11.6	5.64	0.0038	12915	86.11	FADDEDLQSEWR
Q53LQ0	Protein disulfide isomerase-like 1-1 OS=Oryza sativa subsp. japonica GN=PDIL1-1 PE=2 SV=1	57047	24.6	5.01	-0.0001	2678	60.01	FFQSSAAK
Q53LQ0	Protein disulfide isomerase-like 1-1 OS=Oryza sativa subsp. japonica GN=PDIL1-1 PE=2 SV=1	57047	24.6	5.01	0.0002	3349	30	MVPYESGR
Q53LQ0	Protein disulfide isomerase-like 1-1 OS=Oryza sativa subsp. japonica GN=PDIL1-1 PE=2 SV=1	57047	24.6	5.01	0.0017	3355	27.53	MVPYESGR
Q53LQ0	Protein disulfide isomerase-like 1-1 OS=Oryza sativa subsp. japonica GN=PDIL1-1 PE=2 SV=1	57047	24.6	5.01	-0.0001	3652	27	MVPYESGR
Q53LQ0	Protein disulfide isomerase-like 1-1 OS=Oryza sativa subsp. japonica GN=PDIL1-1 PE=2 SV=1	57047	24.6	5.01	-0.0001	3851	27.06	FIDASSTPK
Q53LQ0	Protein disulfide isomerase-like 1-1 OS=Oryza sativa subsp. japonica GN=PDIL1-1 PE=2 SV=1	57047	24.6	5.01	-0.0001	3854	29.77	FIDASSTPK
Q53LQ0	Protein disulfide isomerase-like 1-1 OS=Oryza sativa subsp. japonica GN=PDIL1-1 PE=2 SV=1	57047	24.6	5.01	0.0003	3858	24.65	FIDASSTPK
Q53LQ0	Protein disulfide isomerase-like 1-1 OS=Oryza sativa subsp. japonica GN=PDIL1-1 PE=2 SV=1	57047	24.6	5.01	0.0015	3862	26.4	FIDASSTPK
Q53LQ0	Protein disulfide isomerase-like 1-1 OS=Oryza sativa subsp. japonica GN=PDIL1-1 PE=2 SV=1	57047	24.6	5.01	-0.0001	4067	25.9	SDKDVVIAK
Q53LQ0	Protein disulfide isomerase-like 1-1 OS=Oryza sativa subsp. japonica GN=PDIL1-1 PE=2 SV=1	57047	24.6	5.01	0.0008	5274	22.42	DFDVTALEK
Q53LQ0	Protein disulfide isomerase-like 1-1 OS=Oryza sativa subsp. japonica GN=PDIL1-1 PE=2 SV=1	57047	24.6	5.01	-0.0008	7533	27.61	TADEIVDFIK
Q53LQ0	Protein disulfide isomerase-like 1-1 OS=Oryza sativa subsp. japonica GN=PDIL1-1 PE=2 SV=1	57047	24.6	5.01	-0.0012	8138	21.34	GDAAVERPLVR
Q53LQ0	Protein disulfide isomerase-like 1-1 OS=Oryza sativa subsp. japonica GN=PDIL1-1 PE=2 SV=1	57047	24.6	5.01	0.0032	10572	27.74	SPEDATNLIDDK
Q53LQ0	Protein disulfide isomerase-like 1-1 OS=Oryza sativa subsp. japonica GN=PDIL1-1 PE=2 SV=1	57047	24.6	5.01	-0.002	11237	56.78	LAPILDEAATTLK
Q53LQ0	Protein disulfide isomerase-like 1-1 OS=Oryza sativa subsp. japonica GN=PDIL1-1 PE=2 SV=1	57047	24.6	5.01	-0.0016	12377	27.91	SPEDATNLIDDKK
Q53LQ0	Protein disulfide isomerase-like 1-1 OS=Oryza sativa subsp. japonica GN=PDIL1-1 PE=2 SV=1	57047	24.6	5.01	0.0015	12378	40.71	SPEDATNLIDDKK
Q53LQ0	Protein disulfide isomerase-like 1-1 OS=Oryza sativa subsp. japonica GN=PDIL1-1 PE=2 SV=1	57047	24.6	5.01	-0.0004	12442	56.09	SEPIPEVNDEPVK
Q53LQ0	Protein disulfide isomerase-like 1-1 OS=Oryza sativa subsp. japonica GN=PDIL1-1 PE=2 SV=1	57047	24.6	5.01	0.0005	12443	47.82	SEPIPEVNDEPVK
Q53LQ0	Protein disulfide isomerase-like 1-1 OS=Oryza sativa subsp. japonica GN=PDIL1-1 PE=2 SV=1	57047	24.6	5.01	0.0012	12444	55.94	SEPIPEVNDEPVK
Q53LQ0	Protein disulfide isomerase-like 1-1 OS=Oryza sativa subsp. japonica GN=PDIL1-1 PE=2 SV=1	57047	24.6	5.01	0.0017	12445	57.5	SEPIPEVNDEPVK
Q53LQ0	Protein disulfide isomerase-like 1-1 OS=Oryza sativa subsp. japonica GN=PDIL1-1 PE=2 SV=1	57047	24.6	5.01	0.0035	12446	49.15	SEPIPEVNDEPVK
Q53LQ0	Protein disulfide isomerase-like 1-1 OS=Oryza sativa subsp. japonica GN=PDIL1-1 PE=2 SV=1	57047	24.6	5.01	0.0018	12739	50.42	KLAPILDEAATTLK
Q53LQ0	Protein disulfide isomerase-like 1-1 OS=Oryza sativa subsp. japonica GN=PDIL1-1 PE=2 SV=1	57047	24.6	5.01	-0.0006	14301	36.91	EDQVPLIIIQDGESK
Q53LQ0	Protein disulfide isomerase-like 1-1 OS=Oryza sativa subsp. japonica GN=PDIL1-1 PE=2 SV=1	57047	24.6	5.01	0.0011	14302	60.48	EDQVPLIIIQDGESK
Q6K5G8	Glyceraldehyde-3-phosphate dehydrogenase 3, cytosolic OS=Oryza sativa subsp. japonica GN=GAPC3 PE=2 SV=1	36716	28.8	7.68	-0.0008	815	28.62	TLIFGTK
Q6K5G8	Glyceraldehyde-3-phosphate dehydrogenase 3, cytosolic OS=Oryza sativa subsp. japonica GN=GAPC3 PE=2 SV=1	36716	28.8	7.68	-0.0006	16153	59.83	SDVNIVSNASCTTNCLAPLAK
Q6K5G8	Glyceraldehyde-3-phosphate dehydrogenase 3, cytosolic OS=Oryza sativa subsp. japonica GN=GAPC3 PE=2 SV=1	36716	28.8	7.68	0.0004	16154	108.92	SDVNIVSNASCTTNCLAPLAK
Q6K5G8	Glyceraldehyde-3-phosphate dehydrogenase 3, cytosolic OS=Oryza sativa subsp. japonica GN=GAPC3 PE=2 SV=1	36716	28.8	7.68	0.0023	16155	95.6	SDVNIVSNASCTTNCLAPLAK
Q0DUA3	Os03g0197300 protein OS=Oryza sativa subsp. japonica GN=Os03g0197300 PE=4 SV=1	68529	13.6	5.52	-0.0003	97	22.16	LLSSQR
Q0DUA3	Os03g0197300 protein OS=Oryza sativa subsp. japonica GN=Os03g0197300 PE=4 SV=1	68529	13.6	5.52	-0.0003	98	28.22	LLSSQR
Q0DUA3	Os03g0197300 protein OS=Oryza sativa subsp. japonica GN=Os03g0197300 PE=4 SV=1	68529	13.6	5.52	0.0001	99	20.17	LLSSQR
Q0DUA3	Os03g0197300 protein OS=Oryza sativa subsp. japonica GN=Os03g0197300 PE=4 SV=1	68529	13.6	5.52	0.0003	100	29.24	LLSSQR
Q0DUA3	Os03g0197300 protein OS=Oryza sativa subsp. japonica GN=Os03g0197300 PE=4 SV=1	68529	13.6	5.52	0.0006	101	25	LLSSQR
Q0DUA3	Os03g0197300 protein OS=Oryza sativa subsp. japonica GN=Os03g0197300 PE=4 SV=1	68529	13.6	5.52	-0.0013	1200	20.17	EVVESIK
Q0DUA3	Os03g0197300 protein OS=Oryza sativa subsp. japonica GN=Os03g0197300 PE=4 SV=1	68529	13.6	5.52	-0.001	4209	57.73	EGDVLVVPR
Q0DUA3	Os03g0197300 protein OS=Oryza sativa subsp. japonica GN=Os03g0197300 PE=4 SV=1	68529	13.6	5.52	-0.0009	4210	42.97	EGDVLVVPR
Q0DUA3	Os03g0197300 protein OS=Oryza sativa subsp. japonica GN=Os03g0197300 PE=4 SV=1	68529	13.6	5.52	-0.0002	4211	31.44	EGDVLVVPR
Q0DUA3	Os03g0197300 protein OS=Oryza sativa subsp. japonica GN=Os03g0197300 PE=4 SV=1	68529	13.6	5.52	0.0003	4212	43.41	EGDVLVVPR
Q0DUA3	Os03g0197300 protein OS=Oryza sativa subsp. japonica GN=Os03g0197300 PE=4 SV=1	68529	13.6	5.52	-0.0003	8606	33.64	VKEGDVLVVPR
Q0DUA3	Os03g0197300 protein OS=Oryza sativa subsp. japonica GN=Os03g0197300 PE=4 SV=1	68529	13.6	5.52	-0.0013	15328	87.93	ESTIMACTSCAEELER
Q0DUA3	Os03g0197300 protein OS=Oryza sativa subsp. japonica GN=Os03g0197300 PE=4 SV=1	68529	13.6	5.52	-0.0007	15329	70.91	ESTIMACTSCAEELER
Q0DUA3	Os03g0197300 protein OS=Oryza sativa subsp. japonica GN=Os03g0197300 PE=4 SV=1	68529	13.6	5.52	0.0005	15330	46.33	ESTIMACTSCAEELER
Q0DUA3	Os03g0197300 protein OS=Oryza sativa subsp. japonica GN=Os03g0197300 PE=4 SV=1	68529	13.6	5.52	-0.0028	15368	60.22	ESTIMACTSCAEELER
Q0DUA3	Os03g0197300 protein OS=Oryza sativa subsp. japonica GN=Os03g0197300 PE=4 SV=1	68529	13.6	5.52	-0.0019	15369	25.38	ESTIMACTSCAEELER
Q0DUA3	Os03g0197300 protein OS=Oryza sativa subsp. japonica GN=Os03g0197300 PE=4 SV=1	68529	13.6	5.52	-0.0006	15370	76.91	ESTIMACTSCAEELER
Q0DUA3	Os03g0197300 protein OS=Oryza sativa subsp. japonica GN=Os03g0197300 PE=4 SV=1	68529	13.6	5.52	0.0004	15371	72.12	ESTIMACTSCAEELER
Q0DUA3	Os03g0197300 protein OS=Oryza sativa subsp. japonica GN=Os03g0197300 PE=4 SV=1	68529	13.6	5.52	0.0009	15372	72.71	ESTIMACTSCAEELER
Q0DUA3	Os03g0197300 protein OS=Oryza sativa subsp. japonica GN=Os03g0197300 PE=4 SV=1	68529	13.6	5.52	0.0013	15373	76.78	ESTIMACTSCAEELER
Q0DUA3	Os03g0197300 protein OS=Oryza sativa subsp. japonica GN=Os03g0197300 PE=4 SV=1	68529	13.6	5.52	-0.0116	15658	47.49	VTYIEEGDSESSSLQVER
Q0DUA3	Os03g0197300 protein OS=Oryza sativa subsp. japonica GN=Os03g0197300 PE=4 SV=1	68529	13.6	5.52	-0.0108	15659	23	VTYIEEGDSESSSLQVER
Q0DUA3	Os03g0197300 protein OS=Oryza sativa subsp. japonica GN=Os03g0197300 PE=4 SV=1	68529	13.6	5.52	-0.0088	15660	115.71	VTYIEEGDSESSSLQVER
Q0DUA3	Os03g0197300 protein OS=Oryza sativa subsp. japonica GN=Os03g0197300 PE=4 SV=1	68529	13.6	5.52	-0.0056	15661	75.43	VTYIEEGDSESSSLQVER
Q0DUA3	Os03g0197300 protein OS=Oryza sativa subsp. japonica GN=Os03g0197300 PE=4 SV=1	68529	13.6	5.52	-0.0042	15662	88.28	VTYIEEGDSESSSLQVER
Q0DUA3	Os03g0197300 protein OS=Oryza sativa subsp. japonica GN=Os03g0197300 PE=4 SV=1	68529	13.6	5.52	-0.0017	15663	109.78	VTYIEEGDSESSSLQVER
Q0DUA3	Os03g0197300 protein OS=Oryza sativa subsp. japonica GN=Os03g0197300 PE=4 SV=1	68529	13.6	5.52	-0.0005	15664	96.48	VTYIEEGDSESSSLQVER
Q0DUA3	Os03g0197300 protein OS=Oryza sativa subsp. japonica GN=Os03g0197300 PE=4 SV=1	68529	13.6	5.52	0.0004	15665	77.25	VTYIEEGDSESSSLQVER
Q0DUA3	Os03g0197300 protein OS=Oryza sativa subsp. japonica GN=Os03g0197300 PE=4 SV=1	68529	13.6	5.52	0.0017	15666	88.57	VTYIEEGDSESSSLQVER
Q0DUA3	Os03g0197300 protein OS=Oryza sativa subsp. japonica GN=Os03g0197300 PE=4 SV=1	68529	13.6	5.52	-0.0006	16201	86.18	VVAASDAGLVTAVDVADAAGTAYR
Q0DUA3	Os03g0197300 protein OS=Oryza sativa subsp. japonica GN=Os03g0197300 PE=4 SV=1	68529	13.6	5.52	0.0001	16202	140.16	VVAASDAGLVTAVDVADAAGTAYR
Q2R223	Embryo-specific protein OS=Oryza sativa subsp. japonica GN=Os11g0582400 PE=2 SV=1	49179	21.2	6.04	-0.0004	783	33.78	QCEWR
Q2R223	Embryo-specific protein OS=Oryza sativa subsp. japonica GN=Os11g0582400 PE=2 SV=1	49179	21.2	6.04	-0.0003	784	35.55	QCEWR
Q2R223	Embryo-specific protein OS=Oryza sativa subsp. japonica GN=Os11g0582400 PE=2 SV=1	49179	21.2	6.04	-0.0003	785	35.21	QCEWR
Q2R223	Embryo-specific protein OS=Oryza sativa subsp. japonica GN=Os11g0582400 PE=2 SV=1	49179	21.2	6.04	-0.0003	786	34.98	QCEWR
Q2R223	Embryo-specific protein OS=Oryza sativa subsp. japonica GN=Os11g0582400 PE=2 SV=1	49179	21.2	6.04	-0.0003	787	25.95	QCEWR
Q2R223	Embryo-specific protein OS=Oryza sativa subsp. japonica GN=Os11g0582400 PE=2 SV=1	49179	21.2	6.04	-0.0003	788	26.84	QCEWR
Q2R223	Embryo-specific protein OS=Oryza sativa subsp. japonica GN=Os11g0582400 PE=2 SV=1	49179	21.2	6.04	-0.0003	789	39.52	QCEWR
Q2R223	Embryo-specific protein OS=Oryza sativa subsp. japonica GN=Os11g0582400 PE=2 SV=1	49179	21.2	6.04	-0.0003	790	34.78	QCEWR
Q2R223	Embryo-specific protein OS=Oryza sativa subsp. japonica GN=Os11g0582400 PE=2 SV=1	49179	21.2	6.04	-0.0003	792	22.37	QCEWR
Q2R223	Embryo-specific protein OS=Oryza sativa subsp. japonica GN=Os11g0582400 PE=2 SV=1	49179	21.2	6.04	-0.0002	793	39.49	QCEWR
Q2R223	Embryo-specific protein OS=Oryza sativa subsp. japonica GN=Os11g0582400 PE=2 SV=1	49179	21.2	6.04	-0.0001	794	20.73	QCEWR
Q2R223	Embryo-specific protein OS=Oryza sativa subsp. japonica GN=Os11g0582400 PE=2 SV=1	49179	21.2	6.04	-0.0001	795	33.31	QCEWR
Q2R223	Embryo-specific protein OS=Oryza sativa subsp. japonica GN=Os11g0582400 PE=2 SV=1	49179	21.2	6.04	0	796	25.44	QCEWR
Q2R223	Embryo-specific protein OS=Oryza sativa subsp. japonica GN=Os11g0582400 PE=2 SV=1	49179	21.2	6.04	-0.0007	2116	28.74	KQECMR
Q2R223	Embryo-specific protein OS=Oryza sativa subsp. japonica GN=Os11g0582400 PE=2 SV=1	49179	21.2	6.04	-0.0006	2117	25.86	KQECMR
Q2R223	Embryo-specific protein OS=Oryza sativa subsp. japonica GN=Os11g0582400 PE=2 SV=1	49179	21.2	6.04	-0.0004	2118	32.66	KQECMR
Q2R223	Embryo-specific protein OS=Oryza sativa subsp. japonica GN=Os11g0582400 PE=2 SV=1	49179	21.2	6.04	-0.0003	2119	24.08	KQECMR
Q2R223	Embryo-specific protein OS=Oryza sativa subsp. japonica GN=Os11g0582400 PE=2 SV=1	49179	21.2	6.04	-0.0002	2120	20.8	KQECMR
Q2R223	Embryo-specific protein OS=Oryza sativa subsp. japonica GN=Os11g0582400 PE=2 SV=1	49179	21.2	6.04	-0.0001	2121	39.35	KQECMR
Q2R223	Embryo-specific protein OS=Oryza sativa subsp. japonica GN=Os11g0582400 PE=2 SV=1	49179	21.2	6.04	-0.0001	2122	28	KQECMR
Q2R223	Embryo-specific protein OS=Oryza sativa subsp. japonica GN=Os11g0582400 PE=2 SV=1	49179	21.2	6.04	0	2124	35.82	KQECMR
Q2R223	Embryo-specific protein OS=Oryza sativa subsp. japonica GN=Os11g0582400 PE=2 SV=1	49179	21.2	6.04	0.0001	2125	29.82	KQECMR
Q2R223	Embryo-specific protein OS=Oryza sativa subsp. japonica GN=Os11g0582400 PE=2 SV=1	49179	21.2	6.04	0.0004	2126	23.72	KQECMR
Q2R223	Embryo-specific protein OS=Oryza sativa subsp. japonica GN=Os11g0582400 PE=2 SV=1	49179	21.2	6.04	0.0007	2127	24	KQECMR
Q2R223	Embryo-specific protein OS=Oryza sativa subsp. japonica GN=Os11g0582400 PE=2 SV=1	49179	21.2	6.04	-0.0002	2164	31.59	CLMDCR
Q2R223	Embryo-specific protein OS=Oryza sativa subsp. japonica GN=Os11g0582400 PE=2 SV=1	49179	21.2	6.04	-0.0001	2165	31.02	CLMDCR
Q2R223	Embryo-specific protein OS=Oryza sativa subsp. japonica GN=Os11g0582400 PE=2 SV=1	49179	21.2	6.04	0	2166	36.6	CLMDCR
Q2R223	Embryo-specific protein OS=Oryza sativa subsp. japonica GN=Os11g0582400 PE=2 SV=1	49179	21.2	6.04	0	2167	37.65	CLMDCR
Q2R223	Embryo-specific protein OS=Oryza sativa subsp. japonica GN=Os11g0582400 PE=2 SV=1	49179	21.2	6.04	0.0001	2168	40.52	CLMDCR
Q2R223	Embryo-specific protein OS=Oryza sativa subsp. japonica GN=Os11g0582400 PE=2 SV=1	49179	21.2	6.04	0.0001	2169	29.3	CLMDCR
Q2R223	Embryo-specific protein OS=Oryza sativa subsp. japonica GN=Os11g0582400 PE=2 SV=1	49179	21.2	6.04	0.0002	2170	31.01	CLMDCR
Q2R223	Embryo-specific protein OS=Oryza sativa subsp. japonica GN=Os11g0582400 PE=2 SV=1	49179	21.2	6.04	0.0002	2171	35.95	CLMDCR
Q2R223	Embryo-specific protein OS=Oryza sativa subsp. japonica GN=Os11g0582400 PE=2 SV=1	49179	21.2	6.04	0.0003	2172	36.87	CLMDCR
Q2R223	Embryo-specific protein OS=Oryza sativa subsp. japonica GN=Os11g0582400 PE=2 SV=1	49179	21.2	6.04	0.0004	2174	38.91	CLMDCR
Q2R223	Embryo-specific protein OS=Oryza sativa subsp. japonica GN=Os11g0582400 PE=2 SV=1	49179	21.2	6.04	0.0005	2175	35.92	CLMDCR
Q2R223	Embryo-specific protein OS=Oryza sativa subsp. japonica GN=Os11g0582400 PE=2 SV=1	49179	21.2	6.04	-0.0009	2401	27.31	CLMDCR
Q2R223	Embryo-specific protein OS=Oryza sativa subsp. japonica GN=Os11g0582400 PE=2 SV=1	49179	21.2	6.04	0	2402	22.68	CLMDCR
Q2R223	Embryo-specific protein OS=Oryza sativa subsp. japonica GN=Os11g0582400 PE=2 SV=1	49179	21.2	6.04	0.0001	2403	20.33	CLMDCR
Q2R223	Embryo-specific protein OS=Oryza sativa subsp. japonica GN=Os11g0582400 PE=2 SV=1	49179	21.2	6.04	0.0002	2404	26.44	CLMDCR
Q2R223	Embryo-specific protein OS=Oryza sativa subsp. japonica GN=Os11g0582400 PE=2 SV=1	49179	21.2	6.04	-0.0012	4308	21.31	WEAGQDQR
Q2R223	Embryo-specific protein OS=Oryza sativa subsp. japonica GN=Os11g0582400 PE=2 SV=1	49179	21.2	6.04	-0.0002	4311	30.99	WEAGQDQR
Q2R223	Embryo-specific protein OS=Oryza sativa subsp. japonica GN=Os11g0582400 PE=2 SV=1	49179	21.2	6.04	0.0001	4312	31.82	WEAGQDQR
Q2R223	Embryo-specific protein OS=Oryza sativa subsp. japonica GN=Os11g0582400 PE=2 SV=1	49179	21.2	6.04	-0.0001	6481	35.35	QQCIQDCR
Q2R223	Embryo-specific protein OS=Oryza sativa subsp. japonica GN=Os11g0582400 PE=2 SV=1	49179	21.2	6.04	0.0001	6482	44.51	QQCIQDCR
Q2R223	Embryo-specific protein OS=Oryza sativa subsp. japonica GN=Os11g0582400 PE=2 SV=1	49179	21.2	6.04	0.0002	6483	26.6	QQCIQDCR
Q2R223	Embryo-specific protein OS=Oryza sativa subsp. japonica GN=Os11g0582400 PE=2 SV=1	49179	21.2	6.04	0.0003	6485	34.09	QQCIQDCR
Q2R223	Embryo-specific protein OS=Oryza sativa subsp. japonica GN=Os11g0582400 PE=2 SV=1	49179	21.2	6.04	0.0005	6486	36.76	QQCIQDCR
Q2R223	Embryo-specific protein OS=Oryza sativa subsp. japonica GN=Os11g0582400 PE=2 SV=1	49179	21.2	6.04	0.0005	6487	22.11	QQCIQDCR
Q2R223	Embryo-specific protein OS=Oryza sativa subsp. japonica GN=Os11g0582400 PE=2 SV=1	49179	21.2	6.04	0.0008	6488	27.85	QQCIQDCR
Q2R223	Embryo-specific protein OS=Oryza sativa subsp. japonica GN=Os11g0582400 PE=2 SV=1	49179	21.2	6.04	-0.0004	6913	29.31	QQCMQDCR
Q2R223	Embryo-specific protein OS=Oryza sativa subsp. japonica GN=Os11g0582400 PE=2 SV=1	49179	21.2	6.04	0.0002	6914	43.68	QQCMQDCR
Q2R223	Embryo-specific protein OS=Oryza sativa subsp. japonica GN=Os11g0582400 PE=2 SV=1	49179	21.2	6.04	0.0002	6915	32.91	QQCMQDCR
Q2R223	Embryo-specific protein OS=Oryza sativa subsp. japonica GN=Os11g0582400 PE=2 SV=1	49179	21.2	6.04	0.0004	6916	43.36	QQCMQDCR
Q2R223	Embryo-specific protein OS=Oryza sativa subsp. japonica GN=Os11g0582400 PE=2 SV=1	49179	21.2	6.04	0.0004	6917	21.8	QQCMQDCR
Q2R223	Embryo-specific protein OS=Oryza sativa subsp. japonica GN=Os11g0582400 PE=2 SV=1	49179	21.2	6.04	0.0012	6918	30.17	QQCMQDCR
Q2R223	Embryo-specific protein OS=Oryza sativa subsp. japonica GN=Os11g0582400 PE=2 SV=1	49179	21.2	6.04	0	7304	30.42	QQCMEECR
Q2R223	Embryo-specific protein OS=Oryza sativa subsp. japonica GN=Os11g0582400 PE=2 SV=1	49179	21.2	6.04	0.0008	7305	29.81	QQCMEECR
Q2R223	Embryo-specific protein OS=Oryza sativa subsp. japonica GN=Os11g0582400 PE=2 SV=1	49179	21.2	6.04	0.0011	7306	47.9	QQCMEECR
Q2R223	Embryo-specific protein OS=Oryza sativa subsp. japonica GN=Os11g0582400 PE=2 SV=1	49179	21.2	6.04	0.0013	7307	31.3	QQCMEECR
Q2R223	Embryo-specific protein OS=Oryza sativa subsp. japonica GN=Os11g0582400 PE=2 SV=1	49179	21.2	6.04	0.0045	8964	25.39	KQQCIQDCR
Q2R223	Embryo-specific protein OS=Oryza sativa subsp. japonica GN=Os11g0582400 PE=2 SV=1	49179	21.2	6.04	0.005	8965	21.13	KQQCIQDCR
Q2R223	Embryo-specific protein OS=Oryza sativa subsp. japonica GN=Os11g0582400 PE=2 SV=1	49179	21.2	6.04	-0.0008	9256	48	ECEEQCLQR
Q2R223	Embryo-specific protein OS=Oryza sativa subsp. japonica GN=Os11g0582400 PE=2 SV=1	49179	21.2	6.04	-0.0003	9257	27.03	ECEEQCLQR
Q2R223	Embryo-specific protein OS=Oryza sativa subsp. japonica GN=Os11g0582400 PE=2 SV=1	49179	21.2	6.04	0.0001	9258	32.49	ECEEQCLQR
Q2R223	Embryo-specific protein OS=Oryza sativa subsp. japonica GN=Os11g0582400 PE=2 SV=1	49179	21.2	6.04	0.0002	9259	44.46	ECEEQCLQR
Q2R223	Embryo-specific protein OS=Oryza sativa subsp. japonica GN=Os11g0582400 PE=2 SV=1	49179	21.2	6.04	0.0002	9260	43.98	ECEEQCLQR
Q2R223	Embryo-specific protein OS=Oryza sativa subsp. japonica GN=Os11g0582400 PE=2 SV=1	49179	21.2	6.04	0.0028	9261	26.52	ECEEQCLQR
Q2R223	Embryo-specific protein OS=Oryza sativa subsp. japonica GN=Os11g0582400 PE=2 SV=1	49179	21.2	6.04	-0.0099	9796	37.9	RQQCMQDCR
Q2R223	Embryo-specific protein OS=Oryza sativa subsp. japonica GN=Os11g0582400 PE=2 SV=1	49179	21.2	6.04	-0.0012	14079	20.98	QLRECEEQCLQR
Q2R223	Embryo-specific protein OS=Oryza sativa subsp. japonica GN=Os11g0582400 PE=2 SV=1	49179	21.2	6.04	-0.0028	14381	32.26	EQCEHQQDWWEK
Q653V4	Os06g0676700 protein OS=Oryza sativa subsp. japonica GN=B1153E06.13-1 PE=4 SV=1	96860	9.4	7	-0.0001	1364	31.14	IADADGPR
Q7FAH2	Glyceraldehyde-3-phosphate dehydrogenase 2, cytosolic OS=Oryza sativa subsp. japonica GN=GAPC2 PE=1 SV=1	36921	28.2	6.34	-0.0004	145	22.48	VVDLIR
Q7FAH2	Glyceraldehyde-3-phosphate dehydrogenase 2, cytosolic OS=Oryza sativa subsp. japonica GN=GAPC2 PE=1 SV=1	36921	28.2	6.34	-0.0003	1268	29.39	TLLFGEK
Q7FAH2	Glyceraldehyde-3-phosphate dehydrogenase 2, cytosolic OS=Oryza sativa subsp. japonica GN=GAPC2 PE=1 SV=1	36921	28.2	6.34	0.001	3891	26.17	EVTVFGCR
Q10QZ6	Elongation factor 1-alpha OS=Oryza sativa subsp. japonica GN=Os03g0177400 PE=2 SV=1	49604	24.2	9.14	-0.0007	622	23.88	YDEIVK
Q10QZ6	Elongation factor 1-alpha OS=Oryza sativa subsp. japonica GN=Os03g0177400 PE=2 SV=1	49604	24.2	9.14	-0.0006	623	25.69	YDEIVK
Q10QZ6	Elongation factor 1-alpha OS=Oryza sativa subsp. japonica GN=Os03g0177400 PE=2 SV=1	49604	24.2	9.14	-0.0003	625	28.34	YDEIVK
Q10QZ6	Elongation factor 1-alpha OS=Oryza sativa subsp. japonica GN=Os03g0177400 PE=2 SV=1	49604	24.2	9.14	-0.0001	627	34.75	YDEIVK
Q10QZ6	Elongation factor 1-alpha OS=Oryza sativa subsp. japonica GN=Os03g0177400 PE=2 SV=1	49604	24.2	9.14	0.0002	629	24.56	YDEIVK
Q10QZ6	Elongation factor 1-alpha OS=Oryza sativa subsp. japonica GN=Os03g0177400 PE=2 SV=1	49604	24.2	9.14	-0.0012	1620	20.14	EVSSYLK
Q10QZ6	Elongation factor 1-alpha OS=Oryza sativa subsp. japonica GN=Os03g0177400 PE=2 SV=1	49604	24.2	9.14	-0.001	1621	25.42	EVSSYLK
Q10QZ6	Elongation factor 1-alpha OS=Oryza sativa subsp. japonica GN=Os03g0177400 PE=2 SV=1	49604	24.2	9.14	-0.0009	1622	25.04	EVSSYLK
Q10QZ6	Elongation factor 1-alpha OS=Oryza sativa subsp. japonica GN=Os03g0177400 PE=2 SV=1	49604	24.2	9.14	-0.0008	1623	23.03	EVSSYLK
Q10QZ6	Elongation factor 1-alpha OS=Oryza sativa subsp. japonica GN=Os03g0177400 PE=2 SV=1	49604	24.2	9.14	-0.0007	1624	26.55	EVSSYLK
Q10QZ6	Elongation factor 1-alpha OS=Oryza sativa subsp. japonica GN=Os03g0177400 PE=2 SV=1	49604	24.2	9.14	-0.0006	1625	23.75	EVSSYLK
Q10QZ6	Elongation factor 1-alpha OS=Oryza sativa subsp. japonica GN=Os03g0177400 PE=2 SV=1	49604	24.2	9.14	-0.0005	1626	30.76	EVSSYLK
Q10QZ6	Elongation factor 1-alpha OS=Oryza sativa subsp. japonica GN=Os03g0177400 PE=2 SV=1	49604	24.2	9.14	-0.0002	1629	24.84	EVSSYLK
Q10QZ6	Elongation factor 1-alpha OS=Oryza sativa subsp. japonica GN=Os03g0177400 PE=2 SV=1	49604	24.2	9.14	-0.0002	1630	22.26	EVSSYLK
Q10QZ6	Elongation factor 1-alpha OS=Oryza sativa subsp. japonica GN=Os03g0177400 PE=2 SV=1	49604	24.2	9.14	-0.0001	1631	20.88	EVSSYLK
Q10QZ6	Elongation factor 1-alpha OS=Oryza sativa subsp. japonica GN=Os03g0177400 PE=2 SV=1	49604	24.2	9.14	0.0002	1634	27.38	EVSSYLK
Q10QZ6	Elongation factor 1-alpha OS=Oryza sativa subsp. japonica GN=Os03g0177400 PE=2 SV=1	49604	24.2	9.14	0.0003	1635	26.13	EVSSYLK
Q10QZ6	Elongation factor 1-alpha OS=Oryza sativa subsp. japonica GN=Os03g0177400 PE=2 SV=1	49604	24.2	9.14	0.0004	1636	21.33	EVSSYLK
Q10QZ6	Elongation factor 1-alpha OS=Oryza sativa subsp. japonica GN=Os03g0177400 PE=2 SV=1	49604	24.2	9.14	0.0011	1637	21.64	EVSSYLK
Q10QZ6	Elongation factor 1-alpha OS=Oryza sativa subsp. japonica GN=Os03g0177400 PE=2 SV=1	49604	24.2	9.14	0.0012	1638	26.78	EVSSYLK
Q10QZ6	Elongation factor 1-alpha OS=Oryza sativa subsp. japonica GN=Os03g0177400 PE=2 SV=1	49604	24.2	9.14	-0.0012	3073	31.71	QTVAVGVIK
Q10QZ6	Elongation factor 1-alpha OS=Oryza sativa subsp. japonica GN=Os03g0177400 PE=2 SV=1	49604	24.2	9.14	-0.0005	3074	26.19	QTVAVGVIK
Q10QZ6	Elongation factor 1-alpha OS=Oryza sativa subsp. japonica GN=Os03g0177400 PE=2 SV=1	49604	24.2	9.14	-0.0005	3075	24.39	QTVAVGVIK
Q10QZ6	Elongation factor 1-alpha OS=Oryza sativa subsp. japonica GN=Os03g0177400 PE=2 SV=1	49604	24.2	9.14	-0.0004	3076	32.93	QTVAVGVIK
Q10QZ6	Elongation factor 1-alpha OS=Oryza sativa subsp. japonica GN=Os03g0177400 PE=2 SV=1	49604	24.2	9.14	-0.0004	3077	21.76	QTVAVGVIK
Q10QZ6	Elongation factor 1-alpha OS=Oryza sativa subsp. japonica GN=Os03g0177400 PE=2 SV=1	49604	24.2	9.14	-0.0004	3078	32.76	QTVAVGVIK
Q10QZ6	Elongation factor 1-alpha OS=Oryza sativa subsp. japonica GN=Os03g0177400 PE=2 SV=1	49604	24.2	9.14	-0.0003	3080	20.05	QTVAVGVIK
Q10QZ6	Elongation factor 1-alpha OS=Oryza sativa subsp. japonica GN=Os03g0177400 PE=2 SV=1	49604	24.2	9.14	-0.0002	3081	34.59	QTVAVGVIK
Q10QZ6	Elongation factor 1-alpha OS=Oryza sativa subsp. japonica GN=Os03g0177400 PE=2 SV=1	49604	24.2	9.14	-0.0002	3082	29.49	QTVAVGVIK
Q10QZ6	Elongation factor 1-alpha OS=Oryza sativa subsp. japonica GN=Os03g0177400 PE=2 SV=1	49604	24.2	9.14	-0.0002	3083	37.85	QTVAVGVIK
Q10QZ6	Elongation factor 1-alpha OS=Oryza sativa subsp. japonica GN=Os03g0177400 PE=2 SV=1	49604	24.2	9.14	0	3084	20.45	QTVAVGVIK
Q10QZ6	Elongation factor 1-alpha OS=Oryza sativa subsp. japonica GN=Os03g0177400 PE=2 SV=1	49604	24.2	9.14	0	3085	32.12	QTVAVGVIK
Q10QZ6	Elongation factor 1-alpha OS=Oryza sativa subsp. japonica GN=Os03g0177400 PE=2 SV=1	49604	24.2	9.14	0	3086	31.82	QTVAVGVIK
Q10QZ6	Elongation factor 1-alpha OS=Oryza sativa subsp. japonica GN=Os03g0177400 PE=2 SV=1	49604	24.2	9.14	0.0001	3087	32.81	QTVAVGVIK
Q10QZ6	Elongation factor 1-alpha OS=Oryza sativa subsp. japonica GN=Os03g0177400 PE=2 SV=1	49604	24.2	9.14	0.0001	3088	24.59	QTVAVGVIK
Q10QZ6	Elongation factor 1-alpha OS=Oryza sativa subsp. japonica GN=Os03g0177400 PE=2 SV=1	49604	24.2	9.14	-0.0001	4076	43.38	LPLQDVYK
Q10QZ6	Elongation factor 1-alpha OS=Oryza sativa subsp. japonica GN=Os03g0177400 PE=2 SV=1	49604	24.2	9.14	0.0003	4077	25.08	LPLQDVYK
Q10QZ6	Elongation factor 1-alpha OS=Oryza sativa subsp. japonica GN=Os03g0177400 PE=2 SV=1	49604	24.2	9.14	0.0003	5081	39.89	IGGIGTVPVGR
Q10QZ6	Elongation factor 1-alpha OS=Oryza sativa subsp. japonica GN=Os03g0177400 PE=2 SV=1	49604	24.2	9.14	0.0004	5082	35.14	IGGIGTVPVGR
Q10QZ6	Elongation factor 1-alpha OS=Oryza sativa subsp. japonica GN=Os03g0177400 PE=2 SV=1	49604	24.2	9.14	0.0007	5083	53.05	IGGIGTVPVGR
Q10QZ6	Elongation factor 1-alpha OS=Oryza sativa subsp. japonica GN=Os03g0177400 PE=2 SV=1	49604	24.2	9.14	0.0009	5084	43.51	IGGIGTVPVGR
Q10QZ6	Elongation factor 1-alpha OS=Oryza sativa subsp. japonica GN=Os03g0177400 PE=2 SV=1	49604	24.2	9.14	0.0009	5085	23.03	IGGIGTVPVGR
Q10QZ6	Elongation factor 1-alpha OS=Oryza sativa subsp. japonica GN=Os03g0177400 PE=2 SV=1	49604	24.2	9.14	-0.0011	6823	25.42	STTTGHLIYK
Q10QZ6	Elongation factor 1-alpha OS=Oryza sativa subsp. japonica GN=Os03g0177400 PE=2 SV=1	49604	24.2	9.14	0.0006	6826	35.78	STTTGHLIYK
Q10QZ6	Elongation factor 1-alpha OS=Oryza sativa subsp. japonica GN=Os03g0177400 PE=2 SV=1	49604	24.2	9.14	-0.0009	11139	33.82	GYVASNSKDDPAK
Q10QZ6	Elongation factor 1-alpha OS=Oryza sativa subsp. japonica GN=Os03g0177400 PE=2 SV=1	49604	24.2	9.14	-0.0007	11140	61.06	GYVASNSKDDPAK
Q10QZ6	Elongation factor 1-alpha OS=Oryza sativa subsp. japonica GN=Os03g0177400 PE=2 SV=1	49604	24.2	9.14	-0.0002	11141	44.12	GYVASNSKDDPAK
Q10QZ6	Elongation factor 1-alpha OS=Oryza sativa subsp. japonica GN=Os03g0177400 PE=2 SV=1	49604	24.2	9.14	0	11142	50.01	GYVASNSKDDPAK
Q10QZ6	Elongation factor 1-alpha OS=Oryza sativa subsp. japonica GN=Os03g0177400 PE=2 SV=1	49604	24.2	9.14	-0.0018	16271	66.47	MIPTKPMVVETFSEYPPLGR
Q10QZ6	Elongation factor 1-alpha OS=Oryza sativa subsp. japonica GN=Os03g0177400 PE=2 SV=1	49604	24.2	9.14	0.0004	16374	74.35	VETGVLKPGMVVTFGPSGLTTEVK
Q0J8A4	Glyceraldehyde-3-phosphate dehydrogenase 1, cytosolic OS=Oryza sativa subsp. japonica GN=GAPC1 PE=1 SV=1	36561	22.8	6.61	-0.0004	1309	44.42	LTGMSFR
Q0J8A4	Glyceraldehyde-3-phosphate dehydrogenase 1, cytosolic OS=Oryza sativa subsp. japonica GN=GAPC1 PE=1 SV=1	36561	22.8	6.61	0	1885	32.51	AASYDAIK
Q0DJB9	Os05g0303000 protein (Fragment) OS=Oryza sativa subsp. japonica GN=Os05g0303000 PE=3 SV=1	48676	20.3	4.57	-0.0002	4195	22.16	IPAVQDLVK
Q0DJB9	Os05g0303000 protein (Fragment) OS=Oryza sativa subsp. japonica GN=Os05g0303000 PE=3 SV=1	48676	20.3	4.57	0.0002	4196	23.12	IPAVQDLVK
Q0DJB9	Os05g0303000 protein (Fragment) OS=Oryza sativa subsp. japonica GN=Os05g0303000 PE=3 SV=1	48676	20.3	4.57	-0.0006	7835	31.79	DAVAGGSTQTMK
Q0DJB9	Os05g0303000 protein (Fragment) OS=Oryza sativa subsp. japonica GN=Os05g0303000 PE=3 SV=1	48676	20.3	4.57	0.0001	11852	45.27	FEELCSDLLDR
Q8H7M3	Putative r40c1 protein-rice OS=Oryza sativa subsp. japonica GN=OSJNBb0014I10.3 PE=4 SV=1	42237	22.8	6.25	-0.0009	579	34.23	MLNNIR
Q8H7M3	Putative r40c1 protein-rice OS=Oryza sativa subsp. japonica GN=OSJNBb0014I10.3 PE=4 SV=1	42237	22.8	6.25	-0.0006	580	40.81	MLNNIR
Q8H7M3	Putative r40c1 protein-rice OS=Oryza sativa subsp. japonica GN=OSJNBb0014I10.3 PE=4 SV=1	42237	22.8	6.25	-0.0003	581	36.23	MLNNIR
Q8H7M3	Putative r40c1 protein-rice OS=Oryza sativa subsp. japonica GN=OSJNBb0014I10.3 PE=4 SV=1	42237	22.8	6.25	-0.0001	582	35.87	MLNNIR
Q8H7M3	Putative r40c1 protein-rice OS=Oryza sativa subsp. japonica GN=OSJNBb0014I10.3 PE=4 SV=1	42237	22.8	6.25	0.0003	583	38.38	MLNNIR
Q8H7M3	Putative r40c1 protein-rice OS=Oryza sativa subsp. japonica GN=OSJNBb0014I10.3 PE=4 SV=1	42237	22.8	6.25	-0.0003	7250	41.25	ADEGYCVAVR
Q8H7M3	Putative r40c1 protein-rice OS=Oryza sativa subsp. japonica GN=OSJNBb0014I10.3 PE=4 SV=1	42237	22.8	6.25	-0.0003	7251	46.14	ADEGYCVAVR
Q8H7M3	Putative r40c1 protein-rice OS=Oryza sativa subsp. japonica GN=OSJNBb0014I10.3 PE=4 SV=1	42237	22.8	6.25	0	7252	49.09	ADEGYCVAVR
Q8H7M3	Putative r40c1 protein-rice OS=Oryza sativa subsp. japonica GN=OSJNBb0014I10.3 PE=4 SV=1	42237	22.8	6.25	0.0003	7253	63.32	ADEGYCVAVR
Q8H7M3	Putative r40c1 protein-rice OS=Oryza sativa subsp. japonica GN=OSJNBb0014I10.3 PE=4 SV=1	42237	22.8	6.25	0.0004	7254	28.04	ADEGYCVAVR
Q8H7M3	Putative r40c1 protein-rice OS=Oryza sativa subsp. japonica GN=OSJNBb0014I10.3 PE=4 SV=1	42237	22.8	6.25	0.0006	7255	27.06	ADEGYCVAVR
Q8H7M3	Putative r40c1 protein-rice OS=Oryza sativa subsp. japonica GN=OSJNBb0014I10.3 PE=4 SV=1	42237	22.8	6.25	0.0007	7256	56.2	ADEGYCVAVR
Q8H7M3	Putative r40c1 protein-rice OS=Oryza sativa subsp. japonica GN=OSJNBb0014I10.3 PE=4 SV=1	42237	22.8	6.25	0.0007	7257	32.88	ADEGYCVAVR
Q8H7M3	Putative r40c1 protein-rice OS=Oryza sativa subsp. japonica GN=OSJNBb0014I10.3 PE=4 SV=1	42237	22.8	6.25	0.0023	7258	35.07	ADEGYCVAVR
Q8H7M3	Putative r40c1 protein-rice OS=Oryza sativa subsp. japonica GN=OSJNBb0014I10.3 PE=4 SV=1	42237	22.8	6.25	-0.0011	8836	22.1	GGSVCLAPTNPR
Q8H7M3	Putative r40c1 protein-rice OS=Oryza sativa subsp. japonica GN=OSJNBb0014I10.3 PE=4 SV=1	42237	22.8	6.25	-0.0001	8839	26.13	GGSVCLAPTNPR
Q8H7M3	Putative r40c1 protein-rice OS=Oryza sativa subsp. japonica GN=OSJNBb0014I10.3 PE=4 SV=1	42237	22.8	6.25	0.0017	8843	22.01	GGSVCLAPTNPR
Q8H7M3	Putative r40c1 protein-rice OS=Oryza sativa subsp. japonica GN=OSJNBb0014I10.3 PE=4 SV=1	42237	22.8	6.25	0.0029	8844	20.62	GGSVCLAPTNPR
Q8H7M3	Putative r40c1 protein-rice OS=Oryza sativa subsp. japonica GN=OSJNBb0014I10.3 PE=4 SV=1	42237	22.8	6.25	-0.0007	9551	34.36	EGNVVLAPTNPR
Q8H7M3	Putative r40c1 protein-rice OS=Oryza sativa subsp. japonica GN=OSJNBb0014I10.3 PE=4 SV=1	42237	22.8	6.25	0.0003	9553	33	EGNVVLAPTNPR
Q8H7M3	Putative r40c1 protein-rice OS=Oryza sativa subsp. japonica GN=OSJNBb0014I10.3 PE=4 SV=1	42237	22.8	6.25	0.0006	15211	82.58	ILPWGDEAYAGGSANAPR
Q8H7M3	Putative r40c1 protein-rice OS=Oryza sativa subsp. japonica GN=OSJNBb0014I10.3 PE=4 SV=1	42237	22.8	6.25	-0.0058	16190	119.09	LVPYNPGYQDESVLWTESR
Q67IX6	Protein disulfide isomerase-like 1-4 OS=Oryza sativa subsp. japonica GN=PDIL1-4 PE=2 SV=1	62443	15.1	4.76	-0.0009	759	26.57	ILTGEDK
Q67IX6	Protein disulfide isomerase-like 1-4 OS=Oryza sativa subsp. japonica GN=PDIL1-4 PE=2 SV=1	62443	15.1	4.76	-0.0008	6199	41.31	DQSTASTNLR
Q67IX6	Protein disulfide isomerase-like 1-4 OS=Oryza sativa subsp. japonica GN=PDIL1-4 PE=2 SV=1	62443	15.1	4.76	-0.0003	8263	34.06	ASAIADFVSANK
Q67IX6	Protein disulfide isomerase-like 1-4 OS=Oryza sativa subsp. japonica GN=PDIL1-4 PE=2 SV=1	62443	15.1	4.76	-0.0026	10171	35.61	SFEPITFEGDR
Q67IX6	Protein disulfide isomerase-like 1-4 OS=Oryza sativa subsp. japonica GN=PDIL1-4 PE=2 SV=1	62443	15.1	4.76	0.0021	10172	31.2	SFEPITFEGDR
Q67IX6	Protein disulfide isomerase-like 1-4 OS=Oryza sativa subsp. japonica GN=PDIL1-4 PE=2 SV=1	62443	15.1	4.76	0.0007	10317	79.33	VDATEDTDLAQK
Q67IX6	Protein disulfide isomerase-like 1-4 OS=Oryza sativa subsp. japonica GN=PDIL1-4 PE=2 SV=1	62443	15.1	4.76	0.0007	10318	61.97	VDATEDTDLAQK
Q67IX6	Protein disulfide isomerase-like 1-4 OS=Oryza sativa subsp. japonica GN=PDIL1-4 PE=2 SV=1	62443	15.1	4.76	0.001	10319	73.8	VDATEDTDLAQK
Q67IX6	Protein disulfide isomerase-like 1-4 OS=Oryza sativa subsp. japonica GN=PDIL1-4 PE=2 SV=1	62443	15.1	4.76	0.0011	10320	87.72	VDATEDTDLAQK
Q67IX6	Protein disulfide isomerase-like 1-4 OS=Oryza sativa subsp. japonica GN=PDIL1-4 PE=2 SV=1	62443	15.1	4.76	0.0026	10321	52.27	VDATEDTDLAQK
Q67IX6	Protein disulfide isomerase-like 1-4 OS=Oryza sativa subsp. japonica GN=PDIL1-4 PE=2 SV=1	62443	15.1	4.76	-0.0011	11686	75.11	SEPVPESNEGDVK
Q67IX6	Protein disulfide isomerase-like 1-4 OS=Oryza sativa subsp. japonica GN=PDIL1-4 PE=2 SV=1	62443	15.1	4.76	-0.0005	11687	55.03	SEPVPESNEGDVK
Q67IX6	Protein disulfide isomerase-like 1-4 OS=Oryza sativa subsp. japonica GN=PDIL1-4 PE=2 SV=1	62443	15.1	4.76	-0.0005	11688	37.94	SEPVPESNEGDVK
Q67IX6	Protein disulfide isomerase-like 1-4 OS=Oryza sativa subsp. japonica GN=PDIL1-4 PE=2 SV=1	62443	15.1	4.76	0	11689	53.19	SEPVPESNEGDVK
Q67IX6	Protein disulfide isomerase-like 1-4 OS=Oryza sativa subsp. japonica GN=PDIL1-4 PE=2 SV=1	62443	15.1	4.76	0.0016	11690	47.25	SEPVPESNEGDVK
Q67IX6	Protein disulfide isomerase-like 1-4 OS=Oryza sativa subsp. japonica GN=PDIL1-4 PE=2 SV=1	62443	15.1	4.76	0.0056	11691	36.23	SEPVPESNEGDVK
Q67IX6	Protein disulfide isomerase-like 1-4 OS=Oryza sativa subsp. japonica GN=PDIL1-4 PE=2 SV=1	62443	15.1	4.76	0.0005	12428	23.84	TEKDQSTASTNLR
Q67IX6	Protein disulfide isomerase-like 1-4 OS=Oryza sativa subsp. japonica GN=PDIL1-4 PE=2 SV=1	62443	15.1	4.76	0.0007	12429	49.31	TEKDQSTASTNLR
[truncated: 2,093 more rows]

## Sheet: A2
prot_acc	prot_desc	prot_mass	prot_cover	prot_pi	pep_delta	pep_query	pep_score	pep_seq
Q0DEV5	Granule-bound starch synthase 1, chloroplastic/amyloplastic OS=Oryza sativa subsp. japonica GN=WAXY PE=1 SV=1	67004	59.3	8.34	-0.0005	226	24.34	LSVDCK
Q0DEV5	Granule-bound starch synthase 1, chloroplastic/amyloplastic OS=Oryza sativa subsp. japonica GN=WAXY PE=1 SV=1	67004	59.3	8.34	-0.0005	227	27.25	LSVDCK
Q0DEV5	Granule-bound starch synthase 1, chloroplastic/amyloplastic OS=Oryza sativa subsp. japonica GN=WAXY PE=1 SV=1	67004	59.3	8.34	-0.0004	228	42.97	LSVDCK
Q0DEV5	Granule-bound starch synthase 1, chloroplastic/amyloplastic OS=Oryza sativa subsp. japonica GN=WAXY PE=1 SV=1	67004	59.3	8.34	-0.0001	229	38.5	LSVDCK
Q0DEV5	Granule-bound starch synthase 1, chloroplastic/amyloplastic OS=Oryza sativa subsp. japonica GN=WAXY PE=1 SV=1	67004	59.3	8.34	-0.0001	230	43.01	LSVDCK
Q0DEV5	Granule-bound starch synthase 1, chloroplastic/amyloplastic OS=Oryza sativa subsp. japonica GN=WAXY PE=1 SV=1	67004	59.3	8.34	-0.0001	231	42.74	LSVDCK
Q0DEV5	Granule-bound starch synthase 1, chloroplastic/amyloplastic OS=Oryza sativa subsp. japonica GN=WAXY PE=1 SV=1	67004	59.3	8.34	-0.0001	232	43.29	LSVDCK
Q0DEV5	Granule-bound starch synthase 1, chloroplastic/amyloplastic OS=Oryza sativa subsp. japonica GN=WAXY PE=1 SV=1	67004	59.3	8.34	-0.0001	233	43.08	LSVDCK
Q0DEV5	Granule-bound starch synthase 1, chloroplastic/amyloplastic OS=Oryza sativa subsp. japonica GN=WAXY PE=1 SV=1	67004	59.3	8.34	0.0002	327	49.08	KVAATLK
Q0DEV5	Granule-bound starch synthase 1, chloroplastic/amyloplastic OS=Oryza sativa subsp. japonica GN=WAXY PE=1 SV=1	67004	59.3	8.34	-0.0006	593	48.46	VAATLKR
Q0DEV5	Granule-bound starch synthase 1, chloroplastic/amyloplastic OS=Oryza sativa subsp. japonica GN=WAXY PE=1 SV=1	67004	59.3	8.34	-0.0004	594	46.75	VAATLKR
Q0DEV5	Granule-bound starch synthase 1, chloroplastic/amyloplastic OS=Oryza sativa subsp. japonica GN=WAXY PE=1 SV=1	67004	59.3	8.34	-0.0004	595	46.43	VAATLKR
Q0DEV5	Granule-bound starch synthase 1, chloroplastic/amyloplastic OS=Oryza sativa subsp. japonica GN=WAXY PE=1 SV=1	67004	59.3	8.34	-0.0003	596	46.83	VAATLKR
Q0DEV5	Granule-bound starch synthase 1, chloroplastic/amyloplastic OS=Oryza sativa subsp. japonica GN=WAXY PE=1 SV=1	67004	59.3	8.34	-0.0013	1203	23.41	VMVISPR
Q0DEV5	Granule-bound starch synthase 1, chloroplastic/amyloplastic OS=Oryza sativa subsp. japonica GN=WAXY PE=1 SV=1	67004	59.3	8.34	-0.0007	1204	29.3	VMVISPR
Q0DEV5	Granule-bound starch synthase 1, chloroplastic/amyloplastic OS=Oryza sativa subsp. japonica GN=WAXY PE=1 SV=1	67004	59.3	8.34	-0.0005	1205	48.98	VMVISPR
Q0DEV5	Granule-bound starch synthase 1, chloroplastic/amyloplastic OS=Oryza sativa subsp. japonica GN=WAXY PE=1 SV=1	67004	59.3	8.34	-0.0003	1206	35.11	VMVISPR
Q0DEV5	Granule-bound starch synthase 1, chloroplastic/amyloplastic OS=Oryza sativa subsp. japonica GN=WAXY PE=1 SV=1	67004	59.3	8.34	-0.0002	1207	39.66	VMVISPR
Q0DEV5	Granule-bound starch synthase 1, chloroplastic/amyloplastic OS=Oryza sativa subsp. japonica GN=WAXY PE=1 SV=1	67004	59.3	8.34	-0.0002	1208	43.71	VMVISPR
Q0DEV5	Granule-bound starch synthase 1, chloroplastic/amyloplastic OS=Oryza sativa subsp. japonica GN=WAXY PE=1 SV=1	67004	59.3	8.34	-0.0002	1209	34.03	VMVISPR
Q0DEV5	Granule-bound starch synthase 1, chloroplastic/amyloplastic OS=Oryza sativa subsp. japonica GN=WAXY PE=1 SV=1	67004	59.3	8.34	-0.0002	1210	22.53	VMVISPR
Q0DEV5	Granule-bound starch synthase 1, chloroplastic/amyloplastic OS=Oryza sativa subsp. japonica GN=WAXY PE=1 SV=1	67004	59.3	8.34	-0.0002	1211	38.52	VMVISPR
Q0DEV5	Granule-bound starch synthase 1, chloroplastic/amyloplastic OS=Oryza sativa subsp. japonica GN=WAXY PE=1 SV=1	67004	59.3	8.34	-0.0002	1212	46.73	VMVISPR
Q0DEV5	Granule-bound starch synthase 1, chloroplastic/amyloplastic OS=Oryza sativa subsp. japonica GN=WAXY PE=1 SV=1	67004	59.3	8.34	-0.0002	1213	43.95	VMVISPR
Q0DEV5	Granule-bound starch synthase 1, chloroplastic/amyloplastic OS=Oryza sativa subsp. japonica GN=WAXY PE=1 SV=1	67004	59.3	8.34	-0.0002	1214	34.64	VMVISPR
Q0DEV5	Granule-bound starch synthase 1, chloroplastic/amyloplastic OS=Oryza sativa subsp. japonica GN=WAXY PE=1 SV=1	67004	59.3	8.34	-0.0001	1215	34.05	VMVISPR
Q0DEV5	Granule-bound starch synthase 1, chloroplastic/amyloplastic OS=Oryza sativa subsp. japonica GN=WAXY PE=1 SV=1	67004	59.3	8.34	-0.0001	1216	53.38	VMVISPR
Q0DEV5	Granule-bound starch synthase 1, chloroplastic/amyloplastic OS=Oryza sativa subsp. japonica GN=WAXY PE=1 SV=1	67004	59.3	8.34	-0.0001	1217	34.75	VMVISPR
Q0DEV5	Granule-bound starch synthase 1, chloroplastic/amyloplastic OS=Oryza sativa subsp. japonica GN=WAXY PE=1 SV=1	67004	59.3	8.34	-0.0001	1218	53.31	VMVISPR
Q0DEV5	Granule-bound starch synthase 1, chloroplastic/amyloplastic OS=Oryza sativa subsp. japonica GN=WAXY PE=1 SV=1	67004	59.3	8.34	-0.0001	1219	30.19	VMVISPR
Q0DEV5	Granule-bound starch synthase 1, chloroplastic/amyloplastic OS=Oryza sativa subsp. japonica GN=WAXY PE=1 SV=1	67004	59.3	8.34	-0.0001	1220	34.87	VMVISPR
Q0DEV5	Granule-bound starch synthase 1, chloroplastic/amyloplastic OS=Oryza sativa subsp. japonica GN=WAXY PE=1 SV=1	67004	59.3	8.34	-0.0001	1221	34.67	VMVISPR
Q0DEV5	Granule-bound starch synthase 1, chloroplastic/amyloplastic OS=Oryza sativa subsp. japonica GN=WAXY PE=1 SV=1	67004	59.3	8.34	0	1222	35.9	VMVISPR
Q0DEV5	Granule-bound starch synthase 1, chloroplastic/amyloplastic OS=Oryza sativa subsp. japonica GN=WAXY PE=1 SV=1	67004	59.3	8.34	0	1223	50.12	VMVISPR
Q0DEV5	Granule-bound starch synthase 1, chloroplastic/amyloplastic OS=Oryza sativa subsp. japonica GN=WAXY PE=1 SV=1	67004	59.3	8.34	0	1224	49.83	VMVISPR
Q0DEV5	Granule-bound starch synthase 1, chloroplastic/amyloplastic OS=Oryza sativa subsp. japonica GN=WAXY PE=1 SV=1	67004	59.3	8.34	0	1225	40.31	VMVISPR
Q0DEV5	Granule-bound starch synthase 1, chloroplastic/amyloplastic OS=Oryza sativa subsp. japonica GN=WAXY PE=1 SV=1	67004	59.3	8.34	0	1226	42.25	VMVISPR
Q0DEV5	Granule-bound starch synthase 1, chloroplastic/amyloplastic OS=Oryza sativa subsp. japonica GN=WAXY PE=1 SV=1	67004	59.3	8.34	0	1227	33.29	VMVISPR
Q0DEV5	Granule-bound starch synthase 1, chloroplastic/amyloplastic OS=Oryza sativa subsp. japonica GN=WAXY PE=1 SV=1	67004	59.3	8.34	0	1228	35.17	VMVISPR
Q0DEV5	Granule-bound starch synthase 1, chloroplastic/amyloplastic OS=Oryza sativa subsp. japonica GN=WAXY PE=1 SV=1	67004	59.3	8.34	0	1229	54.56	VMVISPR
Q0DEV5	Granule-bound starch synthase 1, chloroplastic/amyloplastic OS=Oryza sativa subsp. japonica GN=WAXY PE=1 SV=1	67004	59.3	8.34	0	1230	46.25	VMVISPR
Q0DEV5	Granule-bound starch synthase 1, chloroplastic/amyloplastic OS=Oryza sativa subsp. japonica GN=WAXY PE=1 SV=1	67004	59.3	8.34	0	1231	39.8	VMVISPR
Q0DEV5	Granule-bound starch synthase 1, chloroplastic/amyloplastic OS=Oryza sativa subsp. japonica GN=WAXY PE=1 SV=1	67004	59.3	8.34	0	1232	34.89	VMVISPR
Q0DEV5	Granule-bound starch synthase 1, chloroplastic/amyloplastic OS=Oryza sativa subsp. japonica GN=WAXY PE=1 SV=1	67004	59.3	8.34	0	1233	36.69	VMVISPR
Q0DEV5	Granule-bound starch synthase 1, chloroplastic/amyloplastic OS=Oryza sativa subsp. japonica GN=WAXY PE=1 SV=1	67004	59.3	8.34	0.0001	1234	53.97	VMVISPR
Q0DEV5	Granule-bound starch synthase 1, chloroplastic/amyloplastic OS=Oryza sativa subsp. japonica GN=WAXY PE=1 SV=1	67004	59.3	8.34	0.0001	1235	44.06	VMVISPR
Q0DEV5	Granule-bound starch synthase 1, chloroplastic/amyloplastic OS=Oryza sativa subsp. japonica GN=WAXY PE=1 SV=1	67004	59.3	8.34	0.0001	1236	39.77	VMVISPR
Q0DEV5	Granule-bound starch synthase 1, chloroplastic/amyloplastic OS=Oryza sativa subsp. japonica GN=WAXY PE=1 SV=1	67004	59.3	8.34	0.0001	1237	38.88	VMVISPR
Q0DEV5	Granule-bound starch synthase 1, chloroplastic/amyloplastic OS=Oryza sativa subsp. japonica GN=WAXY PE=1 SV=1	67004	59.3	8.34	0.0001	1238	42.34	VMVISPR
Q0DEV5	Granule-bound starch synthase 1, chloroplastic/amyloplastic OS=Oryza sativa subsp. japonica GN=WAXY PE=1 SV=1	67004	59.3	8.34	0.0001	1240	41.76	VMVISPR
Q0DEV5	Granule-bound starch synthase 1, chloroplastic/amyloplastic OS=Oryza sativa subsp. japonica GN=WAXY PE=1 SV=1	67004	59.3	8.34	0.0001	1241	47.93	VMVISPR
Q0DEV5	Granule-bound starch synthase 1, chloroplastic/amyloplastic OS=Oryza sativa subsp. japonica GN=WAXY PE=1 SV=1	67004	59.3	8.34	0.0001	1242	29.36	VMVISPR
Q0DEV5	Granule-bound starch synthase 1, chloroplastic/amyloplastic OS=Oryza sativa subsp. japonica GN=WAXY PE=1 SV=1	67004	59.3	8.34	0.0001	1243	36.92	VMVISPR
Q0DEV5	Granule-bound starch synthase 1, chloroplastic/amyloplastic OS=Oryza sativa subsp. japonica GN=WAXY PE=1 SV=1	67004	59.3	8.34	0.0002	1244	44.37	VMVISPR
Q0DEV5	Granule-bound starch synthase 1, chloroplastic/amyloplastic OS=Oryza sativa subsp. japonica GN=WAXY PE=1 SV=1	67004	59.3	8.34	0.0002	1245	48.93	VMVISPR
Q0DEV5	Granule-bound starch synthase 1, chloroplastic/amyloplastic OS=Oryza sativa subsp. japonica GN=WAXY PE=1 SV=1	67004	59.3	8.34	0.0002	1246	41.51	VMVISPR
Q0DEV5	Granule-bound starch synthase 1, chloroplastic/amyloplastic OS=Oryza sativa subsp. japonica GN=WAXY PE=1 SV=1	67004	59.3	8.34	0.0002	1247	42.31	VMVISPR
Q0DEV5	Granule-bound starch synthase 1, chloroplastic/amyloplastic OS=Oryza sativa subsp. japonica GN=WAXY PE=1 SV=1	67004	59.3	8.34	0.0002	1248	44.11	VMVISPR
Q0DEV5	Granule-bound starch synthase 1, chloroplastic/amyloplastic OS=Oryza sativa subsp. japonica GN=WAXY PE=1 SV=1	67004	59.3	8.34	0.0002	1249	40.55	VMVISPR
Q0DEV5	Granule-bound starch synthase 1, chloroplastic/amyloplastic OS=Oryza sativa subsp. japonica GN=WAXY PE=1 SV=1	67004	59.3	8.34	0.0003	1250	39.72	VMVISPR
Q0DEV5	Granule-bound starch synthase 1, chloroplastic/amyloplastic OS=Oryza sativa subsp. japonica GN=WAXY PE=1 SV=1	67004	59.3	8.34	0.0003	1251	43.07	VMVISPR
Q0DEV5	Granule-bound starch synthase 1, chloroplastic/amyloplastic OS=Oryza sativa subsp. japonica GN=WAXY PE=1 SV=1	67004	59.3	8.34	0.0003	1252	39.59	VMVISPR
Q0DEV5	Granule-bound starch synthase 1, chloroplastic/amyloplastic OS=Oryza sativa subsp. japonica GN=WAXY PE=1 SV=1	67004	59.3	8.34	0.0003	1253	48.11	VMVISPR
Q0DEV5	Granule-bound starch synthase 1, chloroplastic/amyloplastic OS=Oryza sativa subsp. japonica GN=WAXY PE=1 SV=1	67004	59.3	8.34	0.0003	1254	45.99	VMVISPR
Q0DEV5	Granule-bound starch synthase 1, chloroplastic/amyloplastic OS=Oryza sativa subsp. japonica GN=WAXY PE=1 SV=1	67004	59.3	8.34	0.0003	1255	29.75	VMVISPR
Q0DEV5	Granule-bound starch synthase 1, chloroplastic/amyloplastic OS=Oryza sativa subsp. japonica GN=WAXY PE=1 SV=1	67004	59.3	8.34	0.0003	1256	38.12	VMVISPR
Q0DEV5	Granule-bound starch synthase 1, chloroplastic/amyloplastic OS=Oryza sativa subsp. japonica GN=WAXY PE=1 SV=1	67004	59.3	8.34	0.0003	1258	39.16	VMVISPR
Q0DEV5	Granule-bound starch synthase 1, chloroplastic/amyloplastic OS=Oryza sativa subsp. japonica GN=WAXY PE=1 SV=1	67004	59.3	8.34	0.0003	1259	50.09	VMVISPR
Q0DEV5	Granule-bound starch synthase 1, chloroplastic/amyloplastic OS=Oryza sativa subsp. japonica GN=WAXY PE=1 SV=1	67004	59.3	8.34	0.0003	1260	52.13	VMVISPR
Q0DEV5	Granule-bound starch synthase 1, chloroplastic/amyloplastic OS=Oryza sativa subsp. japonica GN=WAXY PE=1 SV=1	67004	59.3	8.34	0.0003	1261	52.1	VMVISPR
Q0DEV5	Granule-bound starch synthase 1, chloroplastic/amyloplastic OS=Oryza sativa subsp. japonica GN=WAXY PE=1 SV=1	67004	59.3	8.34	0.0003	1262	32.1	VMVISPR
Q0DEV5	Granule-bound starch synthase 1, chloroplastic/amyloplastic OS=Oryza sativa subsp. japonica GN=WAXY PE=1 SV=1	67004	59.3	8.34	0.0003	1263	29.77	VMVISPR
Q0DEV5	Granule-bound starch synthase 1, chloroplastic/amyloplastic OS=Oryza sativa subsp. japonica GN=WAXY PE=1 SV=1	67004	59.3	8.34	0.0004	1264	35.88	VMVISPR
Q0DEV5	Granule-bound starch synthase 1, chloroplastic/amyloplastic OS=Oryza sativa subsp. japonica GN=WAXY PE=1 SV=1	67004	59.3	8.34	0.0004	1265	54.39	VMVISPR
Q0DEV5	Granule-bound starch synthase 1, chloroplastic/amyloplastic OS=Oryza sativa subsp. japonica GN=WAXY PE=1 SV=1	67004	59.3	8.34	0.0004	1266	50.01	VMVISPR
Q0DEV5	Granule-bound starch synthase 1, chloroplastic/amyloplastic OS=Oryza sativa subsp. japonica GN=WAXY PE=1 SV=1	67004	59.3	8.34	0.0005	1267	54.56	VMVISPR
Q0DEV5	Granule-bound starch synthase 1, chloroplastic/amyloplastic OS=Oryza sativa subsp. japonica GN=WAXY PE=1 SV=1	67004	59.3	8.34	0.0006	1268	23.35	VMVISPR
Q0DEV5	Granule-bound starch synthase 1, chloroplastic/amyloplastic OS=Oryza sativa subsp. japonica GN=WAXY PE=1 SV=1	67004	59.3	8.34	0.0006	1270	47.87	VMVISPR
Q0DEV5	Granule-bound starch synthase 1, chloroplastic/amyloplastic OS=Oryza sativa subsp. japonica GN=WAXY PE=1 SV=1	67004	59.3	8.34	-0.0001	1307	33.79	TGFHMGR
Q0DEV5	Granule-bound starch synthase 1, chloroplastic/amyloplastic OS=Oryza sativa subsp. japonica GN=WAXY PE=1 SV=1	67004	59.3	8.34	0.0003	1308	23.03	TGFHMGR
Q0DEV5	Granule-bound starch synthase 1, chloroplastic/amyloplastic OS=Oryza sativa subsp. japonica GN=WAXY PE=1 SV=1	67004	59.3	8.34	0.0005	1309	22.26	TGFHMGR
Q0DEV5	Granule-bound starch synthase 1, chloroplastic/amyloplastic OS=Oryza sativa subsp. japonica GN=WAXY PE=1 SV=1	67004	59.3	8.34	-0.003	1543	34.06	VMVISPR
Q0DEV5	Granule-bound starch synthase 1, chloroplastic/amyloplastic OS=Oryza sativa subsp. japonica GN=WAXY PE=1 SV=1	67004	59.3	8.34	-0.0023	1544	39.81	VMVISPR
Q0DEV5	Granule-bound starch synthase 1, chloroplastic/amyloplastic OS=Oryza sativa subsp. japonica GN=WAXY PE=1 SV=1	67004	59.3	8.34	-0.0012	1546	39.8	VMVISPR
Q0DEV5	Granule-bound starch synthase 1, chloroplastic/amyloplastic OS=Oryza sativa subsp. japonica GN=WAXY PE=1 SV=1	67004	59.3	8.34	-0.0011	1547	31.25	VMVISPR
Q0DEV5	Granule-bound starch synthase 1, chloroplastic/amyloplastic OS=Oryza sativa subsp. japonica GN=WAXY PE=1 SV=1	67004	59.3	8.34	-0.0011	1548	38.89	VMVISPR
Q0DEV5	Granule-bound starch synthase 1, chloroplastic/amyloplastic OS=Oryza sativa subsp. japonica GN=WAXY PE=1 SV=1	67004	59.3	8.34	-0.001	1549	36.54	VMVISPR
Q0DEV5	Granule-bound starch synthase 1, chloroplastic/amyloplastic OS=Oryza sativa subsp. japonica GN=WAXY PE=1 SV=1	67004	59.3	8.34	-0.001	1550	33.89	VMVISPR
Q0DEV5	Granule-bound starch synthase 1, chloroplastic/amyloplastic OS=Oryza sativa subsp. japonica GN=WAXY PE=1 SV=1	67004	59.3	8.34	-0.001	1551	34.43	VMVISPR
Q0DEV5	Granule-bound starch synthase 1, chloroplastic/amyloplastic OS=Oryza sativa subsp. japonica GN=WAXY PE=1 SV=1	67004	59.3	8.34	-0.0009	1552	32.74	VMVISPR
Q0DEV5	Granule-bound starch synthase 1, chloroplastic/amyloplastic OS=Oryza sativa subsp. japonica GN=WAXY PE=1 SV=1	67004	59.3	8.34	-0.0007	1553	42.47	VMVISPR
Q0DEV5	Granule-bound starch synthase 1, chloroplastic/amyloplastic OS=Oryza sativa subsp. japonica GN=WAXY PE=1 SV=1	67004	59.3	8.34	-0.0006	1555	34.13	VMVISPR
Q0DEV5	Granule-bound starch synthase 1, chloroplastic/amyloplastic OS=Oryza sativa subsp. japonica GN=WAXY PE=1 SV=1	67004	59.3	8.34	-0.0006	1556	41.28	VMVISPR
Q0DEV5	Granule-bound starch synthase 1, chloroplastic/amyloplastic OS=Oryza sativa subsp. japonica GN=WAXY PE=1 SV=1	67004	59.3	8.34	-0.0006	1557	35.2	VMVISPR
Q0DEV5	Granule-bound starch synthase 1, chloroplastic/amyloplastic OS=Oryza sativa subsp. japonica GN=WAXY PE=1 SV=1	67004	59.3	8.34	-0.0005	1558	44.63	VMVISPR
Q0DEV5	Granule-bound starch synthase 1, chloroplastic/amyloplastic OS=Oryza sativa subsp. japonica GN=WAXY PE=1 SV=1	67004	59.3	8.34	-0.0005	1559	30.57	VMVISPR
Q0DEV5	Granule-bound starch synthase 1, chloroplastic/amyloplastic OS=Oryza sativa subsp. japonica GN=WAXY PE=1 SV=1	67004	59.3	8.34	-0.0005	1560	47.46	VMVISPR
Q0DEV5	Granule-bound starch synthase 1, chloroplastic/amyloplastic OS=Oryza sativa subsp. japonica GN=WAXY PE=1 SV=1	67004	59.3	8.34	-0.0005	1561	47.25	VMVISPR
Q0DEV5	Granule-bound starch synthase 1, chloroplastic/amyloplastic OS=Oryza sativa subsp. japonica GN=WAXY PE=1 SV=1	67004	59.3	8.34	-0.0005	1562	37.57	VMVISPR
Q0DEV5	Granule-bound starch synthase 1, chloroplastic/amyloplastic OS=Oryza sativa subsp. japonica GN=WAXY PE=1 SV=1	67004	59.3	8.34	-0.0004	1563	45.98	VMVISPR
Q0DEV5	Granule-bound starch synthase 1, chloroplastic/amyloplastic OS=Oryza sativa subsp. japonica GN=WAXY PE=1 SV=1	67004	59.3	8.34	-0.0004	1564	39.29	VMVISPR
Q0DEV5	Granule-bound starch synthase 1, chloroplastic/amyloplastic OS=Oryza sativa subsp. japonica GN=WAXY PE=1 SV=1	67004	59.3	8.34	-0.0004	1565	25.57	VMVISPR
Q0DEV5	Granule-bound starch synthase 1, chloroplastic/amyloplastic OS=Oryza sativa subsp. japonica GN=WAXY PE=1 SV=1	67004	59.3	8.34	-0.0004	1566	41.15	VMVISPR
Q0DEV5	Granule-bound starch synthase 1, chloroplastic/amyloplastic OS=Oryza sativa subsp. japonica GN=WAXY PE=1 SV=1	67004	59.3	8.34	-0.0004	1567	42.84	VMVISPR
Q0DEV5	Granule-bound starch synthase 1, chloroplastic/amyloplastic OS=Oryza sativa subsp. japonica GN=WAXY PE=1 SV=1	67004	59.3	8.34	-0.0003	1568	38.15	VMVISPR
Q0DEV5	Granule-bound starch synthase 1, chloroplastic/amyloplastic OS=Oryza sativa subsp. japonica GN=WAXY PE=1 SV=1	67004	59.3	8.34	-0.0003	1569	31.64	VMVISPR
Q0DEV5	Granule-bound starch synthase 1, chloroplastic/amyloplastic OS=Oryza sativa subsp. japonica GN=WAXY PE=1 SV=1	67004	59.3	8.34	-0.0003	1570	30.24	VMVISPR
Q0DEV5	Granule-bound starch synthase 1, chloroplastic/amyloplastic OS=Oryza sativa subsp. japonica GN=WAXY PE=1 SV=1	67004	59.3	8.34	-0.0003	1571	39.78	VMVISPR
Q0DEV5	Granule-bound starch synthase 1, chloroplastic/amyloplastic OS=Oryza sativa subsp. japonica GN=WAXY PE=1 SV=1	67004	59.3	8.34	-0.0003	1572	25.15	VMVISPR
Q0DEV5	Granule-bound starch synthase 1, chloroplastic/amyloplastic OS=Oryza sativa subsp. japonica GN=WAXY PE=1 SV=1	67004	59.3	8.34	-0.0003	1573	37.81	VMVISPR
Q0DEV5	Granule-bound starch synthase 1, chloroplastic/amyloplastic OS=Oryza sativa subsp. japonica GN=WAXY PE=1 SV=1	67004	59.3	8.34	-0.0002	1574	47.78	VMVISPR
Q0DEV5	Granule-bound starch synthase 1, chloroplastic/amyloplastic OS=Oryza sativa subsp. japonica GN=WAXY PE=1 SV=1	67004	59.3	8.34	-0.0002	1575	42.38	VMVISPR
Q0DEV5	Granule-bound starch synthase 1, chloroplastic/amyloplastic OS=Oryza sativa subsp. japonica GN=WAXY PE=1 SV=1	67004	59.3	8.34	-0.0002	1576	43.46	VMVISPR
Q0DEV5	Granule-bound starch synthase 1, chloroplastic/amyloplastic OS=Oryza sativa subsp. japonica GN=WAXY PE=1 SV=1	67004	59.3	8.34	-0.0002	1577	39.8	VMVISPR
Q0DEV5	Granule-bound starch synthase 1, chloroplastic/amyloplastic OS=Oryza sativa subsp. japonica GN=WAXY PE=1 SV=1	67004	59.3	8.34	-0.0002	1578	27.37	VMVISPR
Q0DEV5	Granule-bound starch synthase 1, chloroplastic/amyloplastic OS=Oryza sativa subsp. japonica GN=WAXY PE=1 SV=1	67004	59.3	8.34	-0.0002	1579	38.9	VMVISPR
Q0DEV5	Granule-bound starch synthase 1, chloroplastic/amyloplastic OS=Oryza sativa subsp. japonica GN=WAXY PE=1 SV=1	67004	59.3	8.34	-0.0002	1580	42.68	VMVISPR
Q0DEV5	Granule-bound starch synthase 1, chloroplastic/amyloplastic OS=Oryza sativa subsp. japonica GN=WAXY PE=1 SV=1	67004	59.3	8.34	-0.0002	1581	36.91	VMVISPR
Q0DEV5	Granule-bound starch synthase 1, chloroplastic/amyloplastic OS=Oryza sativa subsp. japonica GN=WAXY PE=1 SV=1	67004	59.3	8.34	-0.0002	1582	36.54	VMVISPR
Q0DEV5	Granule-bound starch synthase 1, chloroplastic/amyloplastic OS=Oryza sativa subsp. japonica GN=WAXY PE=1 SV=1	67004	59.3	8.34	-0.0002	1583	44.38	VMVISPR
Q0DEV5	Granule-bound starch synthase 1, chloroplastic/amyloplastic OS=Oryza sativa subsp. japonica GN=WAXY PE=1 SV=1	67004	59.3	8.34	-0.0002	1584	32.46	VMVISPR
Q0DEV5	Granule-bound starch synthase 1, chloroplastic/amyloplastic OS=Oryza sativa subsp. japonica GN=WAXY PE=1 SV=1	67004	59.3	8.34	-0.0002	1585	42.99	VMVISPR
Q0DEV5	Granule-bound starch synthase 1, chloroplastic/amyloplastic OS=Oryza sativa subsp. japonica GN=WAXY PE=1 SV=1	67004	59.3	8.34	-0.0002	1586	38.72	VMVISPR
Q0DEV5	Granule-bound starch synthase 1, chloroplastic/amyloplastic OS=Oryza sativa subsp. japonica GN=WAXY PE=1 SV=1	67004	59.3	8.34	-0.0002	1587	33.66	VMVISPR
Q0DEV5	Granule-bound starch synthase 1, chloroplastic/amyloplastic OS=Oryza sativa subsp. japonica GN=WAXY PE=1 SV=1	67004	59.3	8.34	-0.0002	1588	36.83	VMVISPR
Q0DEV5	Granule-bound starch synthase 1, chloroplastic/amyloplastic OS=Oryza sativa subsp. japonica GN=WAXY PE=1 SV=1	67004	59.3	8.34	-0.0002	1589	34.59	VMVISPR
Q0DEV5	Granule-bound starch synthase 1, chloroplastic/amyloplastic OS=Oryza sativa subsp. japonica GN=WAXY PE=1 SV=1	67004	59.3	8.34	-0.0001	1590	40.88	VMVISPR
Q0DEV5	Granule-bound starch synthase 1, chloroplastic/amyloplastic OS=Oryza sativa subsp. japonica GN=WAXY PE=1 SV=1	67004	59.3	8.34	-0.0001	1591	38.82	VMVISPR
Q0DEV5	Granule-bound starch synthase 1, chloroplastic/amyloplastic OS=Oryza sativa subsp. japonica GN=WAXY PE=1 SV=1	67004	59.3	8.34	0	1592	23.81	VMVISPR
Q0DEV5	Granule-bound starch synthase 1, chloroplastic/amyloplastic OS=Oryza sativa subsp. japonica GN=WAXY PE=1 SV=1	67004	59.3	8.34	0	1593	38.23	VMVISPR
Q0DEV5	Granule-bound starch synthase 1, chloroplastic/amyloplastic OS=Oryza sativa subsp. japonica GN=WAXY PE=1 SV=1	67004	59.3	8.34	0	1594	38.99	VMVISPR
Q0DEV5	Granule-bound starch synthase 1, chloroplastic/amyloplastic OS=Oryza sativa subsp. japonica GN=WAXY PE=1 SV=1	67004	59.3	8.34	0	1595	41.63	VMVISPR
Q0DEV5	Granule-bound starch synthase 1, chloroplastic/amyloplastic OS=Oryza sativa subsp. japonica GN=WAXY PE=1 SV=1	67004	59.3	8.34	0	1596	42.24	VMVISPR
Q0DEV5	Granule-bound starch synthase 1, chloroplastic/amyloplastic OS=Oryza sativa subsp. japonica GN=WAXY PE=1 SV=1	67004	59.3	8.34	0	1597	28.15	VMVISPR
Q0DEV5	Granule-bound starch synthase 1, chloroplastic/amyloplastic OS=Oryza sativa subsp. japonica GN=WAXY PE=1 SV=1	67004	59.3	8.34	0.0001	1598	36.15	VMVISPR
Q0DEV5	Granule-bound starch synthase 1, chloroplastic/amyloplastic OS=Oryza sativa subsp. japonica GN=WAXY PE=1 SV=1	67004	59.3	8.34	0.0001	1599	32.28	VMVISPR
Q0DEV5	Granule-bound starch synthase 1, chloroplastic/amyloplastic OS=Oryza sativa subsp. japonica GN=WAXY PE=1 SV=1	67004	59.3	8.34	0.0001	1600	34.69	VMVISPR
Q0DEV5	Granule-bound starch synthase 1, chloroplastic/amyloplastic OS=Oryza sativa subsp. japonica GN=WAXY PE=1 SV=1	67004	59.3	8.34	0.0001	1601	38.11	VMVISPR
Q0DEV5	Granule-bound starch synthase 1, chloroplastic/amyloplastic OS=Oryza sativa subsp. japonica GN=WAXY PE=1 SV=1	67004	59.3	8.34	0.0002	1602	35.74	VMVISPR
Q0DEV5	Granule-bound starch synthase 1, chloroplastic/amyloplastic OS=Oryza sativa subsp. japonica GN=WAXY PE=1 SV=1	67004	59.3	8.34	0.0003	1603	20.18	VMVISPR
Q0DEV5	Granule-bound starch synthase 1, chloroplastic/amyloplastic OS=Oryza sativa subsp. japonica GN=WAXY PE=1 SV=1	67004	59.3	8.34	0.0004	1604	25.31	VMVISPR
Q0DEV5	Granule-bound starch synthase 1, chloroplastic/amyloplastic OS=Oryza sativa subsp. japonica GN=WAXY PE=1 SV=1	67004	59.3	8.34	0.0005	1606	22.53	VMVISPR
Q0DEV5	Granule-bound starch synthase 1, chloroplastic/amyloplastic OS=Oryza sativa subsp. japonica GN=WAXY PE=1 SV=1	67004	59.3	8.34	0.0005	1607	50.35	VMVISPR
Q0DEV5	Granule-bound starch synthase 1, chloroplastic/amyloplastic OS=Oryza sativa subsp. japonica GN=WAXY PE=1 SV=1	67004	59.3	8.34	0.0008	1608	23.99	VMVISPR
Q0DEV5	Granule-bound starch synthase 1, chloroplastic/amyloplastic OS=Oryza sativa subsp. japonica GN=WAXY PE=1 SV=1	67004	59.3	8.34	0.0011	1609	40.29	VMVISPR
Q0DEV5	Granule-bound starch synthase 1, chloroplastic/amyloplastic OS=Oryza sativa subsp. japonica GN=WAXY PE=1 SV=1	67004	59.3	8.34	0.0012	1610	34	VMVISPR
Q0DEV5	Granule-bound starch synthase 1, chloroplastic/amyloplastic OS=Oryza sativa subsp. japonica GN=WAXY PE=1 SV=1	67004	59.3	8.34	0.0013	1611	33.45	VMVISPR
Q0DEV5	Granule-bound starch synthase 1, chloroplastic/amyloplastic OS=Oryza sativa subsp. japonica GN=WAXY PE=1 SV=1	67004	59.3	8.34	0.0014	1612	32.84	VMVISPR
Q0DEV5	Granule-bound starch synthase 1, chloroplastic/amyloplastic OS=Oryza sativa subsp. japonica GN=WAXY PE=1 SV=1	67004	59.3	8.34	-0.0004	1645	31.92	TGFHMGR
Q0DEV5	Granule-bound starch synthase 1, chloroplastic/amyloplastic OS=Oryza sativa subsp. japonica GN=WAXY PE=1 SV=1	67004	59.3	8.34	0.0001	1991	29.97	DKYITAK
Q0DEV5	Granule-bound starch synthase 1, chloroplastic/amyloplastic OS=Oryza sativa subsp. japonica GN=WAXY PE=1 SV=1	67004	59.3	8.34	-0.0019	2060	27.75	AGILEADR
Q0DEV5	Granule-bound starch synthase 1, chloroplastic/amyloplastic OS=Oryza sativa subsp. japonica GN=WAXY PE=1 SV=1	67004	59.3	8.34	-0.0014	2062	28.98	AGILEADR
Q0DEV5	Granule-bound starch synthase 1, chloroplastic/amyloplastic OS=Oryza sativa subsp. japonica GN=WAXY PE=1 SV=1	67004	59.3	8.34	-0.0013	2063	27.28	AGILEADR
Q0DEV5	Granule-bound starch synthase 1, chloroplastic/amyloplastic OS=Oryza sativa subsp. japonica GN=WAXY PE=1 SV=1	67004	59.3	8.34	-0.0011	2065	29.01	AGILEADR
Q0DEV5	Granule-bound starch synthase 1, chloroplastic/amyloplastic OS=Oryza sativa subsp. japonica GN=WAXY PE=1 SV=1	67004	59.3	8.34	-0.001	2067	25.03	AGILEADR
Q0DEV5	Granule-bound starch synthase 1, chloroplastic/amyloplastic OS=Oryza sativa subsp. japonica GN=WAXY PE=1 SV=1	67004	59.3	8.34	-0.0007	2071	45.92	AGILEADR
Q0DEV5	Granule-bound starch synthase 1, chloroplastic/amyloplastic OS=Oryza sativa subsp. japonica GN=WAXY PE=1 SV=1	67004	59.3	8.34	-0.0007	2072	32.18	AGILEADR
Q0DEV5	Granule-bound starch synthase 1, chloroplastic/amyloplastic OS=Oryza sativa subsp. japonica GN=WAXY PE=1 SV=1	67004	59.3	8.34	-0.0007	2073	28.1	AGILEADR
Q0DEV5	Granule-bound starch synthase 1, chloroplastic/amyloplastic OS=Oryza sativa subsp. japonica GN=WAXY PE=1 SV=1	67004	59.3	8.34	-0.0006	2074	33.18	AGILEADR
Q0DEV5	Granule-bound starch synthase 1, chloroplastic/amyloplastic OS=Oryza sativa subsp. japonica GN=WAXY PE=1 SV=1	67004	59.3	8.34	-0.0006	2076	24.46	AGILEADR
Q0DEV5	Granule-bound starch synthase 1, chloroplastic/amyloplastic OS=Oryza sativa subsp. japonica GN=WAXY PE=1 SV=1	67004	59.3	8.34	-0.0005	2077	29.32	AGILEADR
Q0DEV5	Granule-bound starch synthase 1, chloroplastic/amyloplastic OS=Oryza sativa subsp. japonica GN=WAXY PE=1 SV=1	67004	59.3	8.34	-0.0005	2078	29.03	AGILEADR
Q0DEV5	Granule-bound starch synthase 1, chloroplastic/amyloplastic OS=Oryza sativa subsp. japonica GN=WAXY PE=1 SV=1	67004	59.3	8.34	-0.0005	2079	33.83	AGILEADR
Q0DEV5	Granule-bound starch synthase 1, chloroplastic/amyloplastic OS=Oryza sativa subsp. japonica GN=WAXY PE=1 SV=1	67004	59.3	8.34	-0.0005	2080	29.39	AGILEADR
Q0DEV5	Granule-bound starch synthase 1, chloroplastic/amyloplastic OS=Oryza sativa subsp. japonica GN=WAXY PE=1 SV=1	67004	59.3	8.34	-0.0005	2081	28.79	AGILEADR
Q0DEV5	Granule-bound starch synthase 1, chloroplastic/amyloplastic OS=Oryza sativa subsp. japonica GN=WAXY PE=1 SV=1	67004	59.3	8.34	-0.0005	2082	28.59	AGILEADR
Q0DEV5	Granule-bound starch synthase 1, chloroplastic/amyloplastic OS=Oryza sativa subsp. japonica GN=WAXY PE=1 SV=1	67004	59.3	8.34	-0.0005	2083	27.63	AGILEADR
Q0DEV5	Granule-bound starch synthase 1, chloroplastic/amyloplastic OS=Oryza sativa subsp. japonica GN=WAXY PE=1 SV=1	67004	59.3	8.34	-0.0004	2084	33.09	AGILEADR
Q0DEV5	Granule-bound starch synthase 1, chloroplastic/amyloplastic OS=Oryza sativa subsp. japonica GN=WAXY PE=1 SV=1	67004	59.3	8.34	-0.0004	2085	28.04	AGILEADR
Q0DEV5	Granule-bound starch synthase 1, chloroplastic/amyloplastic OS=Oryza sativa subsp. japonica GN=WAXY PE=1 SV=1	67004	59.3	8.34	-0.0003	2087	33.33	AGILEADR
Q0DEV5	Granule-bound starch synthase 1, chloroplastic/amyloplastic OS=Oryza sativa subsp. japonica GN=WAXY PE=1 SV=1	67004	59.3	8.34	-0.0003	2088	41.74	AGILEADR
Q0DEV5	Granule-bound starch synthase 1, chloroplastic/amyloplastic OS=Oryza sativa subsp. japonica GN=WAXY PE=1 SV=1	67004	59.3	8.34	-0.0003	2089	46.39	AGILEADR
Q0DEV5	Granule-bound starch synthase 1, chloroplastic/amyloplastic OS=Oryza sativa subsp. japonica GN=WAXY PE=1 SV=1	67004	59.3	8.34	-0.0003	2090	26.72	AGILEADR
Q0DEV5	Granule-bound starch synthase 1, chloroplastic/amyloplastic OS=Oryza sativa subsp. japonica GN=WAXY PE=1 SV=1	67004	59.3	8.34	-0.0003	2091	33.5	AGILEADR
Q0DEV5	Granule-bound starch synthase 1, chloroplastic/amyloplastic OS=Oryza sativa subsp. japonica GN=WAXY PE=1 SV=1	67004	59.3	8.34	-0.0003	2092	33.45	AGILEADR
Q0DEV5	Granule-bound starch synthase 1, chloroplastic/amyloplastic OS=Oryza sativa subsp. japonica GN=WAXY PE=1 SV=1	67004	59.3	8.34	-0.0003	2093	32.76	AGILEADR
Q0DEV5	Granule-bound starch synthase 1, chloroplastic/amyloplastic OS=Oryza sativa subsp. japonica GN=WAXY PE=1 SV=1	67004	59.3	8.34	-0.0002	2095	33.7	AGILEADR
Q0DEV5	Granule-bound starch synthase 1, chloroplastic/amyloplastic OS=Oryza sativa subsp. japonica GN=WAXY PE=1 SV=1	67004	59.3	8.34	-0.0002	2096	33.51	AGILEADR
Q0DEV5	Granule-bound starch synthase 1, chloroplastic/amyloplastic OS=Oryza sativa subsp. japonica GN=WAXY PE=1 SV=1	67004	59.3	8.34	-0.0002	2097	32.44	AGILEADR
Q0DEV5	Granule-bound starch synthase 1, chloroplastic/amyloplastic OS=Oryza sativa subsp. japonica GN=WAXY PE=1 SV=1	67004	59.3	8.34	-0.0002	2098	32.96	AGILEADR
Q0DEV5	Granule-bound starch synthase 1, chloroplastic/amyloplastic OS=Oryza sativa subsp. japonica GN=WAXY PE=1 SV=1	67004	59.3	8.34	-0.0002	2099	41.57	AGILEADR
Q0DEV5	Granule-bound starch synthase 1, chloroplastic/amyloplastic OS=Oryza sativa subsp. japonica GN=WAXY PE=1 SV=1	67004	59.3	8.34	-0.0002	2101	28.58	AGILEADR
Q0DEV5	Granule-bound starch synthase 1, chloroplastic/amyloplastic OS=Oryza sativa subsp. japonica GN=WAXY PE=1 SV=1	67004	59.3	8.34	-0.0002	2103	24.9	AGILEADR
Q0DEV5	Granule-bound starch synthase 1, chloroplastic/amyloplastic OS=Oryza sativa subsp. japonica GN=WAXY PE=1 SV=1	67004	59.3	8.34	-0.0002	2104	28.01	AGILEADR
Q0DEV5	Granule-bound starch synthase 1, chloroplastic/amyloplastic OS=Oryza sativa subsp. japonica GN=WAXY PE=1 SV=1	67004	59.3	8.34	-0.0001	2105	28.63	AGILEADR
Q0DEV5	Granule-bound starch synthase 1, chloroplastic/amyloplastic OS=Oryza sativa subsp. japonica GN=WAXY PE=1 SV=1	67004	59.3	8.34	-0.0001	2106	29.39	AGILEADR
Q0DEV5	Granule-bound starch synthase 1, chloroplastic/amyloplastic OS=Oryza sativa subsp. japonica GN=WAXY PE=1 SV=1	67004	59.3	8.34	-0.0001	2107	28.84	AGILEADR
Q0DEV5	Granule-bound starch synthase 1, chloroplastic/amyloplastic OS=Oryza sativa subsp. japonica GN=WAXY PE=1 SV=1	67004	59.3	8.34	-0.0001	2108	27.71	AGILEADR
Q0DEV5	Granule-bound starch synthase 1, chloroplastic/amyloplastic OS=Oryza sativa subsp. japonica GN=WAXY PE=1 SV=1	67004	59.3	8.34	-0.0001	2109	32.82	AGILEADR
Q0DEV5	Granule-bound starch synthase 1, chloroplastic/amyloplastic OS=Oryza sativa subsp. japonica GN=WAXY PE=1 SV=1	67004	59.3	8.34	-0.0001	2110	27.65	AGILEADR
Q0DEV5	Granule-bound starch synthase 1, chloroplastic/amyloplastic OS=Oryza sativa subsp. japonica GN=WAXY PE=1 SV=1	67004	59.3	8.34	0	2111	46.42	AGILEADR
Q0DEV5	Granule-bound starch synthase 1, chloroplastic/amyloplastic OS=Oryza sativa subsp. japonica GN=WAXY PE=1 SV=1	67004	59.3	8.34	0	2112	26.49	AGILEADR
Q0DEV5	Granule-bound starch synthase 1, chloroplastic/amyloplastic OS=Oryza sativa subsp. japonica GN=WAXY PE=1 SV=1	67004	59.3	8.34	0	2113	33.65	AGILEADR
Q0DEV5	Granule-bound starch synthase 1, chloroplastic/amyloplastic OS=Oryza sativa subsp. japonica GN=WAXY PE=1 SV=1	67004	59.3	8.34	0	2114	29.67	AGILEADR
Q0DEV5	Granule-bound starch synthase 1, chloroplastic/amyloplastic OS=Oryza sativa subsp. japonica GN=WAXY PE=1 SV=1	67004	59.3	8.34	0	2117	28.66	AGILEADR
Q0DEV5	Granule-bound starch synthase 1, chloroplastic/amyloplastic OS=Oryza sativa subsp. japonica GN=WAXY PE=1 SV=1	67004	59.3	8.34	0	2118	33.69	AGILEADR
Q0DEV5	Granule-bound starch synthase 1, chloroplastic/amyloplastic OS=Oryza sativa subsp. japonica GN=WAXY PE=1 SV=1	67004	59.3	8.34	0	2119	33.39	AGILEADR
Q0DEV5	Granule-bound starch synthase 1, chloroplastic/amyloplastic OS=Oryza sativa subsp. japonica GN=WAXY PE=1 SV=1	67004	59.3	8.34	0	2120	33.65	AGILEADR
Q0DEV5	Granule-bound starch synthase 1, chloroplastic/amyloplastic OS=Oryza sativa subsp. japonica GN=WAXY PE=1 SV=1	67004	59.3	8.34	0	2121	32.76	AGILEADR
Q0DEV5	Granule-bound starch synthase 1, chloroplastic/amyloplastic OS=Oryza sativa subsp. japonica GN=WAXY PE=1 SV=1	67004	59.3	8.34	0.0001	2122	28.93	AGILEADR
Q0DEV5	Granule-bound starch synthase 1, chloroplastic/amyloplastic OS=Oryza sativa subsp. japonica GN=WAXY PE=1 SV=1	67004	59.3	8.34	0.0001	2123	25.98	AGILEADR
Q0DEV5	Granule-bound starch synthase 1, chloroplastic/amyloplastic OS=Oryza sativa subsp. japonica GN=WAXY PE=1 SV=1	67004	59.3	8.34	0.0002	2124	32.73	AGILEADR
Q0DEV5	Granule-bound starch synthase 1, chloroplastic/amyloplastic OS=Oryza sativa subsp. japonica GN=WAXY PE=1 SV=1	67004	59.3	8.34	0.0004	2125	27.31	AGILEADR
Q0DEV5	Granule-bound starch synthase 1, chloroplastic/amyloplastic OS=Oryza sativa subsp. japonica GN=WAXY PE=1 SV=1	67004	59.3	8.34	0.0014	2126	28.9	AGILEADR
Q0DEV5	Granule-bound starch synthase 1, chloroplastic/amyloplastic OS=Oryza sativa subsp. japonica GN=WAXY PE=1 SV=1	67004	59.3	8.34	0	2600	43.08	VVEPSDVK
Q0DEV5	Granule-bound starch synthase 1, chloroplastic/amyloplastic OS=Oryza sativa subsp. japonica GN=WAXY PE=1 SV=1	67004	59.3	8.34	0.0001	2601	33.53	VVEPSDVK
Q0DEV5	Granule-bound starch synthase 1, chloroplastic/amyloplastic OS=Oryza sativa subsp. japonica GN=WAXY PE=1 SV=1	67004	59.3	8.34	0.0001	2602	32.72	VVEPSDVK
Q0DEV5	Granule-bound starch synthase 1, chloroplastic/amyloplastic OS=Oryza sativa subsp. japonica GN=WAXY PE=1 SV=1	67004	59.3	8.34	0.0002	2603	51.81	VVEPSDVK
Q0DEV5	Granule-bound starch synthase 1, chloroplastic/amyloplastic OS=Oryza sativa subsp. japonica GN=WAXY PE=1 SV=1	67004	59.3	8.34	0.0003	2604	36.93	VVEPSDVK
Q0DEV5	Granule-bound starch synthase 1, chloroplastic/amyloplastic OS=Oryza sativa subsp. japonica GN=WAXY PE=1 SV=1	67004	59.3	8.34	0.0004	2606	37.09	VVEPSDVK
Q0DEV5	Granule-bound starch synthase 1, chloroplastic/amyloplastic OS=Oryza sativa subsp. japonica GN=WAXY PE=1 SV=1	67004	59.3	8.34	0.0005	2607	35.67	VVEPSDVK
Q0DEV5	Granule-bound starch synthase 1, chloroplastic/amyloplastic OS=Oryza sativa subsp. japonica GN=WAXY PE=1 SV=1	67004	59.3	8.34	0.0007	2609	29.41	VVEPSDVK
Q0DEV5	Granule-bound starch synthase 1, chloroplastic/amyloplastic OS=Oryza sativa subsp. japonica GN=WAXY PE=1 SV=1	67004	59.3	8.34	0.0022	2610	50.4	VVEPSDVK
Q0DEV5	Granule-bound starch synthase 1, chloroplastic/amyloplastic OS=Oryza sativa subsp. japonica GN=WAXY PE=1 SV=1	67004	59.3	8.34	-0.0002	3128	20.36	VADRYER
Q0DEV5	Granule-bound starch synthase 1, chloroplastic/amyloplastic OS=Oryza sativa subsp. japonica GN=WAXY PE=1 SV=1	67004	59.3	8.34	0	3130	22.17	VADRYER
Q0DEV5	Granule-bound starch synthase 1, chloroplastic/amyloplastic OS=Oryza sativa subsp. japonica GN=WAXY PE=1 SV=1	67004	59.3	8.34	-0.0005	4809	22.72	VVEPSDVKK
Q0DEV5	Granule-bound starch synthase 1, chloroplastic/amyloplastic OS=Oryza sativa subsp. japonica GN=WAXY PE=1 SV=1	67004	59.3	8.34	-0.0004	4810	22.5	VVEPSDVKK
Q0DEV5	Granule-bound starch synthase 1, chloroplastic/amyloplastic OS=Oryza sativa subsp. japonica GN=WAXY PE=1 SV=1	67004	59.3	8.34	-0.0003	4815	20.36	VVEPSDVKK
Q0DEV5	Granule-bound starch synthase 1, chloroplastic/amyloplastic OS=Oryza sativa subsp. japonica GN=WAXY PE=1 SV=1	67004	59.3	8.34	0	4820	37.54	VVEPSDVKK
Q0DEV5	Granule-bound starch synthase 1, chloroplastic/amyloplastic OS=Oryza sativa subsp. japonica GN=WAXY PE=1 SV=1	67004	59.3	8.34	0.0001	4823	41.26	VVEPSDVKK
Q0DEV5	Granule-bound starch synthase 1, chloroplastic/amyloplastic OS=Oryza sativa subsp. japonica GN=WAXY PE=1 SV=1	67004	59.3	8.34	0.0001	4824	44.78	VVEPSDVKK
Q0DEV5	Granule-bound starch synthase 1, chloroplastic/amyloplastic OS=Oryza sativa subsp. japonica GN=WAXY PE=1 SV=1	67004	59.3	8.34	0.0001	4825	21.22	VVEPSDVKK
Q0DEV5	Granule-bound starch synthase 1, chloroplastic/amyloplastic OS=Oryza sativa subsp. japonica GN=WAXY PE=1 SV=1	67004	59.3	8.34	0.0002	4827	24.76	VVEPSDVKK
Q0DEV5	Granule-bound starch synthase 1, chloroplastic/amyloplastic OS=Oryza sativa subsp. japonica GN=WAXY PE=1 SV=1	67004	59.3	8.34	0.0003	4829	30.58	VVEPSDVKK
Q0DEV5	Granule-bound starch synthase 1, chloroplastic/amyloplastic OS=Oryza sativa subsp. japonica GN=WAXY PE=1 SV=1	67004	59.3	8.34	0.0003	4830	23.62	VVEPSDVKK
Q0DEV5	Granule-bound starch synthase 1, chloroplastic/amyloplastic OS=Oryza sativa subsp. japonica GN=WAXY PE=1 SV=1	67004	59.3	8.34	0.0003	4831	23.25	VVEPSDVKK
Q0DEV5	Granule-bound starch synthase 1, chloroplastic/amyloplastic OS=Oryza sativa subsp. japonica GN=WAXY PE=1 SV=1	67004	59.3	8.34	0.0003	4837	24.6	VVEPSDVKK
Q0DEV5	Granule-bound starch synthase 1, chloroplastic/amyloplastic OS=Oryza sativa subsp. japonica GN=WAXY PE=1 SV=1	67004	59.3	8.34	0.0004	4838	24.88	VVEPSDVKK
Q0DEV5	Granule-bound starch synthase 1, chloroplastic/amyloplastic OS=Oryza sativa subsp. japonica GN=WAXY PE=1 SV=1	67004	59.3	8.34	0.0005	4840	23.07	VVEPSDVKK
Q0DEV5	Granule-bound starch synthase 1, chloroplastic/amyloplastic OS=Oryza sativa subsp. japonica GN=WAXY PE=1 SV=1	67004	59.3	8.34	0.0005	4841	25.78	VVEPSDVKK
Q0DEV5	Granule-bound starch synthase 1, chloroplastic/amyloplastic OS=Oryza sativa subsp. japonica GN=WAXY PE=1 SV=1	67004	59.3	8.34	0.0006	4844	34.71	VVEPSDVKK
Q0DEV5	Granule-bound starch synthase 1, chloroplastic/amyloplastic OS=Oryza sativa subsp. japonica GN=WAXY PE=1 SV=1	67004	59.3	8.34	0.0006	4846	20.36	VVEPSDVKK
Q0DEV5	Granule-bound starch synthase 1, chloroplastic/amyloplastic OS=Oryza sativa subsp. japonica GN=WAXY PE=1 SV=1	67004	59.3	8.34	0.0006	4847	26.75	VVEPSDVKK
Q0DEV5	Granule-bound starch synthase 1, chloroplastic/amyloplastic OS=Oryza sativa subsp. japonica GN=WAXY PE=1 SV=1	67004	59.3	8.34	0.0007	4848	29.01	VVEPSDVKK
Q0DEV5	Granule-bound starch synthase 1, chloroplastic/amyloplastic OS=Oryza sativa subsp. japonica GN=WAXY PE=1 SV=1	67004	59.3	8.34	0.0012	4850	21.24	VVEPSDVKK
Q0DEV5	Granule-bound starch synthase 1, chloroplastic/amyloplastic OS=Oryza sativa subsp. japonica GN=WAXY PE=1 SV=1	67004	59.3	8.34	0.0014	4851	35.11	VVEPSDVKK
Q0DEV5	Granule-bound starch synthase 1, chloroplastic/amyloplastic OS=Oryza sativa subsp. japonica GN=WAXY PE=1 SV=1	67004	59.3	8.34	0.0019	4852	26.82	VVEPSDVKK
Q0DEV5	Granule-bound starch synthase 1, chloroplastic/amyloplastic OS=Oryza sativa subsp. japonica GN=WAXY PE=1 SV=1	67004	59.3	8.34	0.0002	6102	48.7	SMEEKYPGK
Q0DEV5	Granule-bound starch synthase 1, chloroplastic/amyloplastic OS=Oryza sativa subsp. japonica GN=WAXY PE=1 SV=1	67004	59.3	8.34	0.0004	6104	29.66	SMEEKYPGK
Q0DEV5	Granule-bound starch synthase 1, chloroplastic/amyloplastic OS=Oryza sativa subsp. japonica GN=WAXY PE=1 SV=1	67004	59.3	8.34	0.0005	6107	43.74	SMEEKYPGK
Q0DEV5	Granule-bound starch synthase 1, chloroplastic/amyloplastic OS=Oryza sativa subsp. japonica GN=WAXY PE=1 SV=1	67004	59.3	8.34	-0.001	6250	27.01	YDATTAIEAK
Q0DEV5	Granule-bound starch synthase 1, chloroplastic/amyloplastic OS=Oryza sativa subsp. japonica GN=WAXY PE=1 SV=1	67004	59.3	8.34	-0.0003	6253	22.55	YDATTAIEAK
Q0DEV5	Granule-bound starch synthase 1, chloroplastic/amyloplastic OS=Oryza sativa subsp. japonica GN=WAXY PE=1 SV=1	67004	59.3	8.34	-0.0001	6254	28.65	YDATTAIEAK
Q0DEV5	Granule-bound starch synthase 1, chloroplastic/amyloplastic OS=Oryza sativa subsp. japonica GN=WAXY PE=1 SV=1	67004	59.3	8.34	-0.0001	6255	38.73	YDATTAIEAK
Q0DEV5	Granule-bound starch synthase 1, chloroplastic/amyloplastic OS=Oryza sativa subsp. japonica GN=WAXY PE=1 SV=1	67004	59.3	8.34	0.0001	6256	45.46	YDATTAIEAK
Q0DEV5	Granule-bound starch synthase 1, chloroplastic/amyloplastic OS=Oryza sativa subsp. japonica GN=WAXY PE=1 SV=1	67004	59.3	8.34	0.0001	6257	65.51	YDATTAIEAK
Q0DEV5	Granule-bound starch synthase 1, chloroplastic/amyloplastic OS=Oryza sativa subsp. japonica GN=WAXY PE=1 SV=1	67004	59.3	8.34	0.0001	6258	24.66	YDATTAIEAK
Q0DEV5	Granule-bound starch synthase 1, chloroplastic/amyloplastic OS=Oryza sativa subsp. japonica GN=WAXY PE=1 SV=1	67004	59.3	8.34	0.0003	6260	22.99	YDATTAIEAK
Q0DEV5	Granule-bound starch synthase 1, chloroplastic/amyloplastic OS=Oryza sativa subsp. japonica GN=WAXY PE=1 SV=1	67004	59.3	8.34	0.0003	6262	50.28	YDATTAIEAK
Q0DEV5	Granule-bound starch synthase 1, chloroplastic/amyloplastic OS=Oryza sativa subsp. japonica GN=WAXY PE=1 SV=1	67004	59.3	8.34	0.0004	6266	27.65	YDATTAIEAK
Q0DEV5	Granule-bound starch synthase 1, chloroplastic/amyloplastic OS=Oryza sativa subsp. japonica GN=WAXY PE=1 SV=1	67004	59.3	8.34	0.0004	6267	27.39	YDATTAIEAK
Q0DEV5	Granule-bound starch synthase 1, chloroplastic/amyloplastic OS=Oryza sativa subsp. japonica GN=WAXY PE=1 SV=1	67004	59.3	8.34	0.0004	6268	39.67	YDATTAIEAK
Q0DEV5	Granule-bound starch synthase 1, chloroplastic/amyloplastic OS=Oryza sativa subsp. japonica GN=WAXY PE=1 SV=1	67004	59.3	8.34	0.0005	6270	60.16	YDATTAIEAK
Q0DEV5	Granule-bound starch synthase 1, chloroplastic/amyloplastic OS=Oryza sativa subsp. japonica GN=WAXY PE=1 SV=1	67004	59.3	8.34	0.0005	6271	50.23	YDATTAIEAK
Q0DEV5	Granule-bound starch synthase 1, chloroplastic/amyloplastic OS=Oryza sativa subsp. japonica GN=WAXY PE=1 SV=1	67004	59.3	8.34	0.0006	6273	31.93	YDATTAIEAK
Q0DEV5	Granule-bound starch synthase 1, chloroplastic/amyloplastic OS=Oryza sativa subsp. japonica GN=WAXY PE=1 SV=1	67004	59.3	8.34	0.0006	6274	50.48	YDATTAIEAK
Q0DEV5	Granule-bound starch synthase 1, chloroplastic/amyloplastic OS=Oryza sativa subsp. japonica GN=WAXY PE=1 SV=1	67004	59.3	8.34	0.0006	6275	39.04	YDATTAIEAK
Q0DEV5	Granule-bound starch synthase 1, chloroplastic/amyloplastic OS=Oryza sativa subsp. japonica GN=WAXY PE=1 SV=1	67004	59.3	8.34	0.0006	6276	74.45	YDATTAIEAK
Q0DEV5	Granule-bound starch synthase 1, chloroplastic/amyloplastic OS=Oryza sativa subsp. japonica GN=WAXY PE=1 SV=1	67004	59.3	8.34	0.0006	6277	51.62	YDATTAIEAK
Q0DEV5	Granule-bound starch synthase 1, chloroplastic/amyloplastic OS=Oryza sativa subsp. japonica GN=WAXY PE=1 SV=1	67004	59.3	8.34	0.0006	6278	34.48	YDATTAIEAK
Q0DEV5	Granule-bound starch synthase 1, chloroplastic/amyloplastic OS=Oryza sativa subsp. japonica GN=WAXY PE=1 SV=1	67004	59.3	8.34	0.0006	6279	24.55	YDATTAIEAK
Q0DEV5	Granule-bound starch synthase 1, chloroplastic/amyloplastic OS=Oryza sativa subsp. japonica GN=WAXY PE=1 SV=1	67004	59.3	8.34	0.0006	6280	76.57	YDATTAIEAK
Q0DEV5	Granule-bound starch synthase 1, chloroplastic/amyloplastic OS=Oryza sativa subsp. japonica GN=WAXY PE=1 SV=1	67004	59.3	8.34	0.0006	6282	36.46	YDATTAIEAK
Q0DEV5	Granule-bound starch synthase 1, chloroplastic/amyloplastic OS=Oryza sativa subsp. japonica GN=WAXY PE=1 SV=1	67004	59.3	8.34	0.0008	6285	36.36	YDATTAIEAK
Q0DEV5	Granule-bound starch synthase 1, chloroplastic/amyloplastic OS=Oryza sativa subsp. japonica GN=WAXY PE=1 SV=1	67004	59.3	8.34	0.0008	6287	39.05	YDATTAIEAK
Q0DEV5	Granule-bound starch synthase 1, chloroplastic/amyloplastic OS=Oryza sativa subsp. japonica GN=WAXY PE=1 SV=1	67004	59.3	8.34	0.0008	6288	56.56	YDATTAIEAK
Q0DEV5	Granule-bound starch synthase 1, chloroplastic/amyloplastic OS=Oryza sativa subsp. japonica GN=WAXY PE=1 SV=1	67004	59.3	8.34	0.0009	6291	31.01	YDATTAIEAK
Q0DEV5	Granule-bound starch synthase 1, chloroplastic/amyloplastic OS=Oryza sativa subsp. japonica GN=WAXY PE=1 SV=1	67004	59.3	8.34	0.001	6294	32.86	YDATTAIEAK
Q0DEV5	Granule-bound starch synthase 1, chloroplastic/amyloplastic OS=Oryza sativa subsp. japonica GN=WAXY PE=1 SV=1	67004	59.3	8.34	0.001	6295	47.85	YDATTAIEAK
Q0DEV5	Granule-bound starch synthase 1, chloroplastic/amyloplastic OS=Oryza sativa subsp. japonica GN=WAXY PE=1 SV=1	67004	59.3	8.34	0.0011	6297	32.75	YDATTAIEAK
Q0DEV5	Granule-bound starch synthase 1, chloroplastic/amyloplastic OS=Oryza sativa subsp. japonica GN=WAXY PE=1 SV=1	67004	59.3	8.34	0.0011	6299	26.67	YDATTAIEAK
Q0DEV5	Granule-bound starch synthase 1, chloroplastic/amyloplastic OS=Oryza sativa subsp. japonica GN=WAXY PE=1 SV=1	67004	59.3	8.34	0.0011	6301	28.3	YDATTAIEAK
Q0DEV5	Granule-bound starch synthase 1, chloroplastic/amyloplastic OS=Oryza sativa subsp. japonica GN=WAXY PE=1 SV=1	67004	59.3	8.34	0.0012	6302	70.1	YDATTAIEAK
Q0DEV5	Granule-bound starch synthase 1, chloroplastic/amyloplastic OS=Oryza sativa subsp. japonica GN=WAXY PE=1 SV=1	67004	59.3	8.34	0.0059	6307	55.78	YDATTAIEAK
Q0DEV5	Granule-bound starch synthase 1, chloroplastic/amyloplastic OS=Oryza sativa subsp. japonica GN=WAXY PE=1 SV=1	67004	59.3	8.34	-0.0004	6336	49.21	SMEEKYPGK
Q0DEV5	Granule-bound starch synthase 1, chloroplastic/amyloplastic OS=Oryza sativa subsp. japonica GN=WAXY PE=1 SV=1	67004	59.3	8.34	0.0006	6343	33.6	SMEEKYPGK
Q0DEV5	Granule-bound starch synthase 1, chloroplastic/amyloplastic OS=Oryza sativa subsp. japonica GN=WAXY PE=1 SV=1	67004	59.3	8.34	0.001	6345	22.44	SMEEKYPGK
Q0DEV5	Granule-bound starch synthase 1, chloroplastic/amyloplastic OS=Oryza sativa subsp. japonica GN=WAXY PE=1 SV=1	67004	59.3	8.34	0.002	6347	31.33	SMEEKYPGK
Q0DEV5	Granule-bound starch synthase 1, chloroplastic/amyloplastic OS=Oryza sativa subsp. japonica GN=WAXY PE=1 SV=1	67004	59.3	8.34	-0.001	6812	39.02	GCELDNIMR
Q0DEV5	Granule-bound starch synthase 1, chloroplastic/amyloplastic OS=Oryza sativa subsp. japonica GN=WAXY PE=1 SV=1	67004	59.3	8.34	0	6814	36.15	GCELDNIMR
Q0DEV5	Granule-bound starch synthase 1, chloroplastic/amyloplastic OS=Oryza sativa subsp. japonica GN=WAXY PE=1 SV=1	67004	59.3	8.34	0.0004	6818	24.14	GCELDNIMR
Q0DEV5	Granule-bound starch synthase 1, chloroplastic/amyloplastic OS=Oryza sativa subsp. japonica GN=WAXY PE=1 SV=1	67004	59.3	8.34	0.0004	6819	30.9	GCELDNIMR
Q0DEV5	Granule-bound starch synthase 1, chloroplastic/amyloplastic OS=Oryza sativa subsp. japonica GN=WAXY PE=1 SV=1	67004	59.3	8.34	0.0005	6820	55.61	GCELDNIMR
Q0DEV5	Granule-bound starch synthase 1, chloroplastic/amyloplastic OS=Oryza sativa subsp. japonica GN=WAXY PE=1 SV=1	67004	59.3	8.34	0.0005	6821	35.43	GCELDNIMR
Q0DEV5	Granule-bound starch synthase 1, chloroplastic/amyloplastic OS=Oryza sativa subsp. japonica GN=WAXY PE=1 SV=1	67004	59.3	8.34	0.0005	6822	33.99	GCELDNIMR
Q0DEV5	Granule-bound starch synthase 1, chloroplastic/amyloplastic OS=Oryza sativa subsp. japonica GN=WAXY PE=1 SV=1	67004	59.3	8.34	0.0006	6823	40.92	GCELDNIMR
Q0DEV5	Granule-bound starch synthase 1, chloroplastic/amyloplastic OS=Oryza sativa subsp. japonica GN=WAXY PE=1 SV=1	67004	59.3	8.34	0.0007	6825	33.94	GCELDNIMR
Q0DEV5	Granule-bound starch synthase 1, chloroplastic/amyloplastic OS=Oryza sativa subsp. japonica GN=WAXY PE=1 SV=1	67004	59.3	8.34	0.0007	6826	51.69	GCELDNIMR
Q0DEV5	Granule-bound starch synthase 1, chloroplastic/amyloplastic OS=Oryza sativa subsp. japonica GN=WAXY PE=1 SV=1	67004	59.3	8.34	0.0007	6827	64.8	GCELDNIMR
Q0DEV5	Granule-bound starch synthase 1, chloroplastic/amyloplastic OS=Oryza sativa subsp. japonica GN=WAXY PE=1 SV=1	67004	59.3	8.34	0.0016	6833	40.76	GCELDNIMR
Q0DEV5	Granule-bound starch synthase 1, chloroplastic/amyloplastic OS=Oryza sativa subsp. japonica GN=WAXY PE=1 SV=1	67004	59.3	8.34	0.0018	6835	26.98	GCELDNIMR
Q0DEV5	Granule-bound starch synthase 1, chloroplastic/amyloplastic OS=Oryza sativa subsp. japonica GN=WAXY PE=1 SV=1	67004	59.3	8.34	-0.0008	7217	32.29	GCELDNIMR
Q0DEV5	Granule-bound starch synthase 1, chloroplastic/amyloplastic OS=Oryza sativa subsp. japonica GN=WAXY PE=1 SV=1	67004	59.3	8.34	-0.0007	7218	28.86	GCELDNIMR
Q0DEV5	Granule-bound starch synthase 1, chloroplastic/amyloplastic OS=Oryza sativa subsp. japonica GN=WAXY PE=1 SV=1	67004	59.3	8.34	-0.0002	7219	27.67	GCELDNIMR
Q0DEV5	Granule-bound starch synthase 1, chloroplastic/amyloplastic OS=Oryza sativa subsp. japonica GN=WAXY PE=1 SV=1	67004	59.3	8.34	-0.0001	7220	31.81	GCELDNIMR
Q0DEV5	Granule-bound starch synthase 1, chloroplastic/amyloplastic OS=Oryza sativa subsp. japonica GN=WAXY PE=1 SV=1	67004	59.3	8.34	0.0002	7223	35.25	GCELDNIMR
Q0DEV5	Granule-bound starch synthase 1, chloroplastic/amyloplastic OS=Oryza sativa subsp. japonica GN=WAXY PE=1 SV=1	67004	59.3	8.34	0.0002	7224	44.72	GCELDNIMR
Q0DEV5	Granule-bound starch synthase 1, chloroplastic/amyloplastic OS=Oryza sativa subsp. japonica GN=WAXY PE=1 SV=1	67004	59.3	8.34	0.0002	7225	49.12	GCELDNIMR
Q0DEV5	Granule-bound starch synthase 1, chloroplastic/amyloplastic OS=Oryza sativa subsp. japonica GN=WAXY PE=1 SV=1	67004	59.3	8.34	0.0002	7226	43.89	GCELDNIMR
Q0DEV5	Granule-bound starch synthase 1, chloroplastic/amyloplastic OS=Oryza sativa subsp. japonica GN=WAXY PE=1 SV=1	67004	59.3	8.34	0.0003	7228	38.06	GCELDNIMR
Q0DEV5	Granule-bound starch synthase 1, chloroplastic/amyloplastic OS=Oryza sativa subsp. japonica GN=WAXY PE=1 SV=1	67004	59.3	8.34	0.0004	7231	29.21	GCELDNIMR
Q0DEV5	Granule-bound starch synthase 1, chloroplastic/amyloplastic OS=Oryza sativa subsp. japonica GN=WAXY PE=1 SV=1	67004	59.3	8.34	0.0004	7232	33.34	GCELDNIMR
Q0DEV5	Granule-bound starch synthase 1, chloroplastic/amyloplastic OS=Oryza sativa subsp. japonica GN=WAXY PE=1 SV=1	67004	59.3	8.34	0.0004	7233	29.14	GCELDNIMR
Q0DEV5	Granule-bound starch synthase 1, chloroplastic/amyloplastic OS=Oryza sativa subsp. japonica GN=WAXY PE=1 SV=1	67004	59.3	8.34	0.0004	7234	33.29	GCELDNIMR
Q0DEV5	Granule-bound starch synthase 1, chloroplastic/amyloplastic OS=Oryza sativa subsp. japonica GN=WAXY PE=1 SV=1	67004	59.3	8.34	0.0004	7235	30.84	GCELDNIMR
Q0DEV5	Granule-bound starch synthase 1, chloroplastic/amyloplastic OS=Oryza sativa subsp. japonica GN=WAXY PE=1 SV=1	67004	59.3	8.34	0.0004	7236	44.71	GCELDNIMR
Q0DEV5	Granule-bound starch synthase 1, chloroplastic/amyloplastic OS=Oryza sativa subsp. japonica GN=WAXY PE=1 SV=1	67004	59.3	8.34	0.0004	7237	30.9	GCELDNIMR
Q0DEV5	Granule-bound starch synthase 1, chloroplastic/amyloplastic OS=Oryza sativa subsp. japonica GN=WAXY PE=1 SV=1	67004	59.3	8.34	0.0008	7238	26.21	GCELDNIMR
Q0DEV5	Granule-bound starch synthase 1, chloroplastic/amyloplastic OS=Oryza sativa subsp. japonica GN=WAXY PE=1 SV=1	67004	59.3	8.34	0.0013	7239	24.18	GCELDNIMR
Q0DEV5	Granule-bound starch synthase 1, chloroplastic/amyloplastic OS=Oryza sativa subsp. japonica GN=WAXY PE=1 SV=1	67004	59.3	8.34	-0.0005	9164	56.41	IYGPDTGVDYK
Q0DEV5	Granule-bound starch synthase 1, chloroplastic/amyloplastic OS=Oryza sativa subsp. japonica GN=WAXY PE=1 SV=1	67004	59.3	8.34	0.0001	9165	50.14	IYGPDTGVDYK
Q0DEV5	Granule-bound starch synthase 1, chloroplastic/amyloplastic OS=Oryza sativa subsp. japonica GN=WAXY PE=1 SV=1	67004	59.3	8.34	0.0002	9166	51.31	IYGPDTGVDYK
Q0DEV5	Granule-bound starch synthase 1, chloroplastic/amyloplastic OS=Oryza sativa subsp. japonica GN=WAXY PE=1 SV=1	67004	59.3	8.34	0.0003	9167	62.64	IYGPDTGVDYK
Q0DEV5	Granule-bound starch synthase 1, chloroplastic/amyloplastic OS=Oryza sativa subsp. japonica GN=WAXY PE=1 SV=1	67004	59.3	8.34	0.0003	9168	64.25	IYGPDTGVDYK
Q0DEV5	Granule-bound starch synthase 1, chloroplastic/amyloplastic OS=Oryza sativa subsp. japonica GN=WAXY PE=1 SV=1	67004	59.3	8.34	0.0003	9169	69.09	IYGPDTGVDYK
Q0DEV5	Granule-bound starch synthase 1, chloroplastic/amyloplastic OS=Oryza sativa subsp. japonica GN=WAXY PE=1 SV=1	67004	59.3	8.34	0.0004	9170	57.32	IYGPDTGVDYK
Q0DEV5	Granule-bound starch synthase 1, chloroplastic/amyloplastic OS=Oryza sativa subsp. japonica GN=WAXY PE=1 SV=1	67004	59.3	8.34	0.0004	9171	49.31	IYGPDTGVDYK
Q0DEV5	Granule-bound starch synthase 1, chloroplastic/amyloplastic OS=Oryza sativa subsp. japonica GN=WAXY PE=1 SV=1	67004	59.3	8.34	0.0004	9172	65.48	IYGPDTGVDYK
Q0DEV5	Granule-bound starch synthase 1, chloroplastic/amyloplastic OS=Oryza sativa subsp. japonica GN=WAXY PE=1 SV=1	67004	59.3	8.34	0.0004	9173	66.76	IYGPDTGVDYK
Q0DEV5	Granule-bound starch synthase 1, chloroplastic/amyloplastic OS=Oryza sativa subsp. japonica GN=WAXY PE=1 SV=1	67004	59.3	8.34	0.0004	9174	75.45	IYGPDTGVDYK
Q0DEV5	Granule-bound starch synthase 1, chloroplastic/amyloplastic OS=Oryza sativa subsp. japonica GN=WAXY PE=1 SV=1	67004	59.3	8.34	0.0006	9175	82.02	IYGPDTGVDYK
Q0DEV5	Granule-bound starch synthase 1, chloroplastic/amyloplastic OS=Oryza sativa subsp. japonica GN=WAXY PE=1 SV=1	67004	59.3	8.34	0.0006	9176	43.5	IYGPDTGVDYK
Q0DEV5	Granule-bound starch synthase 1, chloroplastic/amyloplastic OS=Oryza sativa subsp. japonica GN=WAXY PE=1 SV=1	67004	59.3	8.34	0.0006	9177	46.47	IYGPDTGVDYK
Q0DEV5	Granule-bound starch synthase 1, chloroplastic/amyloplastic OS=Oryza sativa subsp. japonica GN=WAXY PE=1 SV=1	67004	59.3	8.34	0.0006	9178	38.58	IYGPDTGVDYK
Q0DEV5	Granule-bound starch synthase 1, chloroplastic/amyloplastic OS=Oryza sativa subsp. japonica GN=WAXY PE=1 SV=1	67004	59.3	8.34	0.0007	9179	46.69	IYGPDTGVDYK
Q0DEV5	Granule-bound starch synthase 1, chloroplastic/amyloplastic OS=Oryza sativa subsp. japonica GN=WAXY PE=1 SV=1	67004	59.3	8.34	0.0007	9180	61.3	IYGPDTGVDYK
Q0DEV5	Granule-bound starch synthase 1, chloroplastic/amyloplastic OS=Oryza sativa subsp. japonica GN=WAXY PE=1 SV=1	67004	59.3	8.34	0.0012	9181	59	IYGPDTGVDYK
Q0DEV5	Granule-bound starch synthase 1, chloroplastic/amyloplastic OS=Oryza sativa subsp. japonica GN=WAXY PE=1 SV=1	67004	59.3	8.34	0.0014	9182	47.47	IYGPDTGVDYK
Q0DEV5	Granule-bound starch synthase 1, chloroplastic/amyloplastic OS=Oryza sativa subsp. japonica GN=WAXY PE=1 SV=1	67004	59.3	8.34	0.0017	9183	37.38	IYGPDTGVDYK
Q0DEV5	Granule-bound starch synthase 1, chloroplastic/amyloplastic OS=Oryza sativa subsp. japonica GN=WAXY PE=1 SV=1	67004	59.3	8.34	0.0001	10479	69.79	NCMNQDLSWK
Q0DEV5	Granule-bound starch synthase 1, chloroplastic/amyloplastic OS=Oryza sativa subsp. japonica GN=WAXY PE=1 SV=1	67004	59.3	8.34	0.0001	10480	56.96	NCMNQDLSWK
Q0DEV5	Granule-bound starch synthase 1, chloroplastic/amyloplastic OS=Oryza sativa subsp. japonica GN=WAXY PE=1 SV=1	67004	59.3	8.34	0.0001	10481	73.82	NCMNQDLSWK
Q0DEV5	Granule-bound starch synthase 1, chloroplastic/amyloplastic OS=Oryza sativa subsp. japonica GN=WAXY PE=1 SV=1	67004	59.3	8.34	0.0004	10482	66.12	NCMNQDLSWK
Q0DEV5	Granule-bound starch synthase 1, chloroplastic/amyloplastic OS=Oryza sativa subsp. japonica GN=WAXY PE=1 SV=1	67004	59.3	8.34	0.0004	10483	54.08	NCMNQDLSWK
Q0DEV5	Granule-bound starch synthase 1, chloroplastic/amyloplastic OS=Oryza sativa subsp. japonica GN=WAXY PE=1 SV=1	67004	59.3	8.34	0.0004	10484	43.2	NCMNQDLSWK
Q0DEV5	Granule-bound starch synthase 1, chloroplastic/amyloplastic OS=Oryza sativa subsp. japonica GN=WAXY PE=1 SV=1	67004	59.3	8.34	0.0005	10485	29.36	NCMNQDLSWK
Q0DEV5	Granule-bound starch synthase 1, chloroplastic/amyloplastic OS=Oryza sativa subsp. japonica GN=WAXY PE=1 SV=1	67004	59.3	8.34	0.0011	10486	50.58	NCMNQDLSWK
Q0DEV5	Granule-bound starch synthase 1, chloroplastic/amyloplastic OS=Oryza sativa subsp. japonica GN=WAXY PE=1 SV=1	67004	59.3	8.34	-0.0008	10801	20.96	NCMNQDLSWK
Q0DEV5	Granule-bound starch synthase 1, chloroplastic/amyloplastic OS=Oryza sativa subsp. japonica GN=WAXY PE=1 SV=1	67004	59.3	8.34	-0.0004	10804	74.23	NCMNQDLSWK
Q0DEV5	Granule-bound starch synthase 1, chloroplastic/amyloplastic OS=Oryza sativa subsp. japonica GN=WAXY PE=1 SV=1	67004	59.3	8.34	-0.0003	10805	88.09	NCMNQDLSWK
Q0DEV5	Granule-bound starch synthase 1, chloroplastic/amyloplastic OS=Oryza sativa subsp. japonica GN=WAXY PE=1 SV=1	67004	59.3	8.34	0	10806	67.31	NCMNQDLSWK
Q0DEV5	Granule-bound starch synthase 1, chloroplastic/amyloplastic OS=Oryza sativa subsp. japonica GN=WAXY PE=1 SV=1	67004	59.3	8.34	0	10807	65.33	NCMNQDLSWK
Q0DEV5	Granule-bound starch synthase 1, chloroplastic/amyloplastic OS=Oryza sativa subsp. japonica GN=WAXY PE=1 SV=1	67004	59.3	8.34	0	10808	88.41	NCMNQDLSWK
Q0DEV5	Granule-bound starch synthase 1, chloroplastic/amyloplastic OS=Oryza sativa subsp. japonica GN=WAXY PE=1 SV=1	67004	59.3	8.34	0.0001	10809	70.51	NCMNQDLSWK
Q0DEV5	Granule-bound starch synthase 1, chloroplastic/amyloplastic OS=Oryza sativa subsp. japonica GN=WAXY PE=1 SV=1	67004	59.3	8.34	0.0002	10810	66.58	NCMNQDLSWK
Q0DEV5	Granule-bound starch synthase 1, chloroplastic/amyloplastic OS=Oryza sativa subsp. japonica GN=WAXY PE=1 SV=1	67004	59.3	8.34	0.0002	10811	70.34	NCMNQDLSWK
Q0DEV5	Granule-bound starch synthase 1, chloroplastic/amyloplastic OS=Oryza sativa subsp. japonica GN=WAXY PE=1 SV=1	67004	59.3	8.34	0.0003	10812	89	NCMNQDLSWK
Q0DEV5	Granule-bound starch synthase 1, chloroplastic/amyloplastic OS=Oryza sativa subsp. japonica GN=WAXY PE=1 SV=1	67004	59.3	8.34	0.0003	10813	50.32	NCMNQDLSWK
Q0DEV5	Granule-bound starch synthase 1, chloroplastic/amyloplastic OS=Oryza sativa subsp. japonica GN=WAXY PE=1 SV=1	67004	59.3	8.34	0.0003	10814	68.19	NCMNQDLSWK
Q0DEV5	Granule-bound starch synthase 1, chloroplastic/amyloplastic OS=Oryza sativa subsp. japonica GN=WAXY PE=1 SV=1	67004	59.3	8.34	0.0003	10815	68.45	NCMNQDLSWK
Q0DEV5	Granule-bound starch synthase 1, chloroplastic/amyloplastic OS=Oryza sativa subsp. japonica GN=WAXY PE=1 SV=1	67004	59.3	8.34	0.0004	10816	88.36	NCMNQDLSWK
Q0DEV5	Granule-bound starch synthase 1, chloroplastic/amyloplastic OS=Oryza sativa subsp. japonica GN=WAXY PE=1 SV=1	67004	59.3	8.34	0.0004	10817	66.45	NCMNQDLSWK
Q0DEV5	Granule-bound starch synthase 1, chloroplastic/amyloplastic OS=Oryza sativa subsp. japonica GN=WAXY PE=1 SV=1	67004	59.3	8.34	0.0011	11172	24.53	VFIDHPSFLEK
Q0DEV5	Granule-bound starch synthase 1, chloroplastic/amyloplastic OS=Oryza sativa subsp. japonica GN=WAXY PE=1 SV=1	67004	59.3	8.34	-0.0044	11233	35.7	DAWDTSVVAEIK
Q0DEV5	Granule-bound starch synthase 1, chloroplastic/amyloplastic OS=Oryza sativa subsp. japonica GN=WAXY PE=1 SV=1	67004	59.3	8.34	-0.0022	11238	22.8	DAWDTSVVAEIK
Q0DEV5	Granule-bound starch synthase 1, chloroplastic/amyloplastic OS=Oryza sativa subsp. japonica GN=WAXY PE=1 SV=1	67004	59.3	8.34	-0.0018	11239	50.6	DAWDTSVVAEIK
Q0DEV5	Granule-bound starch synthase 1, chloroplastic/amyloplastic OS=Oryza sativa subsp. japonica GN=WAXY PE=1 SV=1	67004	59.3	8.34	-0.0011	11240	35.41	DAWDTSVVAEIK
Q0DEV5	Granule-bound starch synthase 1, chloroplastic/amyloplastic OS=Oryza sativa subsp. japonica GN=WAXY PE=1 SV=1	67004	59.3	8.34	-0.001	11241	46.06	DAWDTSVVAEIK
Q0DEV5	Granule-bound starch synthase 1, chloroplastic/amyloplastic OS=Oryza sativa subsp. japonica GN=WAXY PE=1 SV=1	67004	59.3	8.34	-0.0003	11242	46	DAWDTSVVAEIK
Q0DEV5	Granule-bound starch synthase 1, chloroplastic/amyloplastic OS=Oryza sativa subsp. japonica GN=WAXY PE=1 SV=1	67004	59.3	8.34	-0.0003	11243	67.81	DAWDTSVVAEIK
Q0DEV5	Granule-bound starch synthase 1, chloroplastic/amyloplastic OS=Oryza sativa subsp. japonica GN=WAXY PE=1 SV=1	67004	59.3	8.34	-0.0003	11244	61.14	DAWDTSVVAEIK
Q0DEV5	Granule-bound starch synthase 1, chloroplastic/amyloplastic OS=Oryza sativa subsp. japonica GN=WAXY PE=1 SV=1	67004	59.3	8.34	0	11245	76.54	DAWDTSVVAEIK
Q0DEV5	Granule-bound starch synthase 1, chloroplastic/amyloplastic OS=Oryza sativa subsp. japonica GN=WAXY PE=1 SV=1	67004	59.3	8.34	0	11246	49.22	DAWDTSVVAEIK
Q0DEV5	Granule-bound starch synthase 1, chloroplastic/amyloplastic OS=Oryza sativa subsp. japonica GN=WAXY PE=1 SV=1	67004	59.3	8.34	0.0002	11247	89.8	DAWDTSVVAEIK
Q0DEV5	Granule-bound starch synthase 1, chloroplastic/amyloplastic OS=Oryza sativa subsp. japonica GN=WAXY PE=1 SV=1	67004	59.3	8.34	0.0006	11248	44.18	DAWDTSVVAEIK
Q0DEV5	Granule-bound starch synthase 1, chloroplastic/amyloplastic OS=Oryza sativa subsp. japonica GN=WAXY PE=1 SV=1	67004	59.3	8.34	-0.0008	11487	56.73	ILNLNNNPYFK
Q0DEV5	Granule-bound starch synthase 1, chloroplastic/amyloplastic OS=Oryza sativa subsp. japonica GN=WAXY PE=1 SV=1	67004	59.3	8.34	-0.0004	11488	58.94	ILNLNNNPYFK
Q0DEV5	Granule-bound starch synthase 1, chloroplastic/amyloplastic OS=Oryza sativa subsp. japonica GN=WAXY PE=1 SV=1	67004	59.3	8.34	-0.0003	11489	55.6	ILNLNNNPYFK
Q0DEV5	Granule-bound starch synthase 1, chloroplastic/amyloplastic OS=Oryza sativa subsp. japonica GN=WAXY PE=1 SV=1	67004	59.3	8.34	-0.0002	11490	54.72	ILNLNNNPYFK
Q0DEV5	Granule-bound starch synthase 1, chloroplastic/amyloplastic OS=Oryza sativa subsp. japonica GN=WAXY PE=1 SV=1	67004	59.3	8.34	-0.0001	11491	58.15	ILNLNNNPYFK
Q0DEV5	Granule-bound starch synthase 1, chloroplastic/amyloplastic OS=Oryza sativa subsp. japonica GN=WAXY PE=1 SV=1	67004	59.3	8.34	0.0001	11492	54.66	ILNLNNNPYFK
Q0DEV5	Granule-bound starch synthase 1, chloroplastic/amyloplastic OS=Oryza sativa subsp. japonica GN=WAXY PE=1 SV=1	67004	59.3	8.34	0.0002	11493	62.56	ILNLNNNPYFK
Q0DEV5	Granule-bound starch synthase 1, chloroplastic/amyloplastic OS=Oryza sativa subsp. japonica GN=WAXY PE=1 SV=1	67004	59.3	8.34	-0.0013	11502	20.07	VVGTPAYEEMVR
Q0DEV5	Granule-bound starch synthase 1, chloroplastic/amyloplastic OS=Oryza sativa subsp. japonica GN=WAXY PE=1 SV=1	67004	59.3	8.34	-0.0009	11503	41.82	VVGTPAYEEMVR
Q0DEV5	Granule-bound starch synthase 1, chloroplastic/amyloplastic OS=Oryza sativa subsp. japonica GN=WAXY PE=1 SV=1	67004	59.3	8.34	-0.0006	11505	56.08	VVGTPAYEEMVR
Q0DEV5	Granule-bound starch synthase 1, chloroplastic/amyloplastic OS=Oryza sativa subsp. japonica GN=WAXY PE=1 SV=1	67004	59.3	8.34	-0.0004	11506	35.89	VVGTPAYEEMVR
Q0DEV5	Granule-bound starch synthase 1, chloroplastic/amyloplastic OS=Oryza sativa subsp. japonica GN=WAXY PE=1 SV=1	67004	59.3	8.34	-0.0002	11507	60.34	VVGTPAYEEMVR
Q0DEV5	Granule-bound starch synthase 1, chloroplastic/amyloplastic OS=Oryza sativa subsp. japonica GN=WAXY PE=1 SV=1	67004	59.3	8.34	0.0002	11508	54.17	VVGTPAYEEMVR
Q0DEV5	Granule-bound starch synthase 1, chloroplastic/amyloplastic OS=Oryza sativa subsp. japonica GN=WAXY PE=1 SV=1	67004	59.3	8.34	0.0008	11509	55.36	VVGTPAYEEMVR
Q0DEV5	Granule-bound starch synthase 1, chloroplastic/amyloplastic OS=Oryza sativa subsp. japonica GN=WAXY PE=1 SV=1	67004	59.3	8.34	0.0009	11510	50.74	VVGTPAYEEMVR
Q0DEV5	Granule-bound starch synthase 1, chloroplastic/amyloplastic OS=Oryza sativa subsp. japonica GN=WAXY PE=1 SV=1	67004	59.3	8.34	-0.0007	11763	38.56	VVGTPAYEEMVR
Q0DEV5	Granule-bound starch synthase 1, chloroplastic/amyloplastic OS=Oryza sativa subsp. japonica GN=WAXY PE=1 SV=1	67004	59.3	8.34	-0.0006	11764	36.2	VVGTPAYEEMVR
Q0DEV5	Granule-bound starch synthase 1, chloroplastic/amyloplastic OS=Oryza sativa subsp. japonica GN=WAXY PE=1 SV=1	67004	59.3	8.34	-0.0002	11765	38.31	VVGTPAYEEMVR
Q0DEV5	Granule-bound starch synthase 1, chloroplastic/amyloplastic OS=Oryza sativa subsp. japonica GN=WAXY PE=1 SV=1	67004	59.3	8.34	-0.0002	11766	37.66	VVGTPAYEEMVR
Q0DEV5	Granule-bound starch synthase 1, chloroplastic/amyloplastic OS=Oryza sativa subsp. japonica GN=WAXY PE=1 SV=1	67004	59.3	8.34	-0.0002	11767	35.92	VVGTPAYEEMVR
Q0DEV5	Granule-bound starch synthase 1, chloroplastic/amyloplastic OS=Oryza sativa subsp. japonica GN=WAXY PE=1 SV=1	67004	59.3	8.34	-0.0002	11768	33.69	VVGTPAYEEMVR
Q0DEV5	Granule-bound starch synthase 1, chloroplastic/amyloplastic OS=Oryza sativa subsp. japonica GN=WAXY PE=1 SV=1	67004	59.3	8.34	-0.0001	11770	38.51	VVGTPAYEEMVR
Q0DEV5	Granule-bound starch synthase 1, chloroplastic/amyloplastic OS=Oryza sativa subsp. japonica GN=WAXY PE=1 SV=1	67004	59.3	8.34	-0.0001	11771	42.83	VVGTPAYEEMVR
Q0DEV5	Granule-bound starch synthase 1, chloroplastic/amyloplastic OS=Oryza sativa subsp. japonica GN=WAXY PE=1 SV=1	67004	59.3	8.34	-0.0001	11772	33.32	VVGTPAYEEMVR
Q0DEV5	Granule-bound starch synthase 1, chloroplastic/amyloplastic OS=Oryza sativa subsp. japonica GN=WAXY PE=1 SV=1	67004	59.3	8.34	-0.0001	11773	36.08	VVGTPAYEEMVR
Q0DEV5	Granule-bound starch synthase 1, chloroplastic/amyloplastic OS=Oryza sativa subsp. japonica GN=WAXY PE=1 SV=1	67004	59.3	8.34	0.0002	11774	47.73	VVGTPAYEEMVR
Q0DEV5	Granule-bound starch synthase 1, chloroplastic/amyloplastic OS=Oryza sativa subsp. japonica GN=WAXY PE=1 SV=1	67004	59.3	8.34	0.0003	11775	46.11	VVGTPAYEEMVR
Q0DEV5	Granule-bound starch synthase 1, chloroplastic/amyloplastic OS=Oryza sativa subsp. japonica GN=WAXY PE=1 SV=1	67004	59.3	8.34	-0.0002	11799	36.9	EALQAEAGLPVDR
Q0DEV5	Granule-bound starch synthase 1, chloroplastic/amyloplastic OS=Oryza sativa subsp. japonica GN=WAXY PE=1 SV=1	67004	59.3	8.34	-0.0001	11800	22.28	EALQAEAGLPVDR
Q0DEV5	Granule-bound starch synthase 1, chloroplastic/amyloplastic OS=Oryza sativa subsp. japonica GN=WAXY PE=1 SV=1	67004	59.3	8.34	-0.0001	11801	26	EALQAEAGLPVDR
Q0DEV5	Granule-bound starch synthase 1, chloroplastic/amyloplastic OS=Oryza sativa subsp. japonica GN=WAXY PE=1 SV=1	67004	59.3	8.34	-0.0001	11802	47.99	EALQAEAGLPVDR
Q0DEV5	Granule-bound starch synthase 1, chloroplastic/amyloplastic OS=Oryza sativa subsp. japonica GN=WAXY PE=1 SV=1	67004	59.3	8.34	0	11803	47.91	EALQAEAGLPVDR
Q0DEV5	Granule-bound starch synthase 1, chloroplastic/amyloplastic OS=Oryza sativa subsp. japonica GN=WAXY PE=1 SV=1	67004	59.3	8.34	0.0001	11804	62.2	EALQAEAGLPVDR
Q0DEV5	Granule-bound starch synthase 1, chloroplastic/amyloplastic OS=Oryza sativa subsp. japonica GN=WAXY PE=1 SV=1	67004	59.3	8.34	0.0001	11805	75.24	EALQAEAGLPVDR
Q0DEV5	Granule-bound starch synthase 1, chloroplastic/amyloplastic OS=Oryza sativa subsp. japonica GN=WAXY PE=1 SV=1	67004	59.3	8.34	0.0001	11806	21.66	EALQAEAGLPVDR
Q0DEV5	Granule-bound starch synthase 1, chloroplastic/amyloplastic OS=Oryza sativa subsp. japonica GN=WAXY PE=1 SV=1	67004	59.3	8.34	0.0001	11807	20.44	EALQAEAGLPVDR
Q0DEV5	Granule-bound starch synthase 1, chloroplastic/amyloplastic OS=Oryza sativa subsp. japonica GN=WAXY PE=1 SV=1	67004	59.3	8.34	0.0002	11808	26.77	EALQAEAGLPVDR
Q0DEV5	Granule-bound starch synthase 1, chloroplastic/amyloplastic OS=Oryza sativa subsp. japonica GN=WAXY PE=1 SV=1	67004	59.3	8.34	0.0003	11809	64.15	EALQAEAGLPVDR
Q0DEV5	Granule-bound starch synthase 1, chloroplastic/amyloplastic OS=Oryza sativa subsp. japonica GN=WAXY PE=1 SV=1	67004	59.3	8.34	0.0003	11810	80.2	EALQAEAGLPVDR
Q0DEV5	Granule-bound starch synthase 1, chloroplastic/amyloplastic OS=Oryza sativa subsp. japonica GN=WAXY PE=1 SV=1	67004	59.3	8.34	0.0003	11811	61.62	EALQAEAGLPVDR
Q0DEV5	Granule-bound starch synthase 1, chloroplastic/amyloplastic OS=Oryza sativa subsp. japonica GN=WAXY PE=1 SV=1	67004	59.3	8.34	0.0003	11812	61.85	EALQAEAGLPVDR
Q0DEV5	Granule-bound starch synthase 1, chloroplastic/amyloplastic OS=Oryza sativa subsp. japonica GN=WAXY PE=1 SV=1	67004	59.3	8.34	0.0005	11813	62.24	EALQAEAGLPVDR
Q0DEV5	Granule-bound starch synthase 1, chloroplastic/amyloplastic OS=Oryza sativa subsp. japonica GN=WAXY PE=1 SV=1	67004	59.3	8.34	0.0005	11814	80.09	EALQAEAGLPVDR
Q0DEV5	Granule-bound starch synthase 1, chloroplastic/amyloplastic OS=Oryza sativa subsp. japonica GN=WAXY PE=1 SV=1	67004	59.3	8.34	0.0005	11815	58.2	EALQAEAGLPVDR
Q0DEV5	Granule-bound starch synthase 1, chloroplastic/amyloplastic OS=Oryza sativa subsp. japonica GN=WAXY PE=1 SV=1	67004	59.3	8.34	0.0005	11816	74.96	EALQAEAGLPVDR
Q0DEV5	Granule-bound starch synthase 1, chloroplastic/amyloplastic OS=Oryza sativa subsp. japonica GN=WAXY PE=1 SV=1	67004	59.3	8.34	0.0007	11817	61.8	EALQAEAGLPVDR
Q0DEV5	Granule-bound starch synthase 1, chloroplastic/amyloplastic OS=Oryza sativa subsp. japonica GN=WAXY PE=1 SV=1	67004	59.3	8.34	0.0008	11818	62.19	EALQAEAGLPVDR
Q0DEV5	Granule-bound starch synthase 1, chloroplastic/amyloplastic OS=Oryza sativa subsp. japonica GN=WAXY PE=1 SV=1	67004	59.3	8.34	0.002	11819	49.01	EALQAEAGLPVDR
Q0DEV5	Granule-bound starch synthase 1, chloroplastic/amyloplastic OS=Oryza sativa subsp. japonica GN=WAXY PE=1 SV=1	67004	59.3	8.34	-0.0011	13080	63.59	FSLLCQAALEAPR
Q0DEV5	Granule-bound starch synthase 1, chloroplastic/amyloplastic OS=Oryza sativa subsp. japonica GN=WAXY PE=1 SV=1	67004	59.3	8.34	-0.001	13081	46.99	FSLLCQAALEAPR
Q0DEV5	Granule-bound starch synthase 1, chloroplastic/amyloplastic OS=Oryza sativa subsp. japonica GN=WAXY PE=1 SV=1	67004	59.3	8.34	-0.0005	13082	40.32	FSLLCQAALEAPR
Q0DEV5	Granule-bound starch synthase 1, chloroplastic/amyloplastic OS=Oryza sativa subsp. japonica GN=WAXY PE=1 SV=1	67004	59.3	8.34	-0.0003	13083	112.5	FSLLCQAALEAPR
Q0DEV5	Granule-bound starch synthase 1, chloroplastic/amyloplastic OS=Oryza sativa subsp. japonica GN=WAXY PE=1 SV=1	67004	59.3	8.34	-0.0001	13084	91.53	FSLLCQAALEAPR
Q0DEV5	Granule-bound starch synthase 1, chloroplastic/amyloplastic OS=Oryza sativa subsp. japonica GN=WAXY PE=1 SV=1	67004	59.3	8.34	0	13085	91.03	FSLLCQAALEAPR
Q0DEV5	Granule-bound starch synthase 1, chloroplastic/amyloplastic OS=Oryza sativa subsp. japonica GN=WAXY PE=1 SV=1	67004	59.3	8.34	0	13086	31	FSLLCQAALEAPR
Q0DEV5	Granule-bound starch synthase 1, chloroplastic/amyloplastic OS=Oryza sativa subsp. japonica GN=WAXY PE=1 SV=1	67004	59.3	8.34	0	13087	45.84	FSLLCQAALEAPR
Q0DEV5	Granule-bound starch synthase 1, chloroplastic/amyloplastic OS=Oryza sativa subsp. japonica GN=WAXY PE=1 SV=1	67004	59.3	8.34	0.0001	13088	62.45	FSLLCQAALEAPR
Q0DEV5	Granule-bound starch synthase 1, chloroplastic/amyloplastic OS=Oryza sativa subsp. japonica GN=WAXY PE=1 SV=1	67004	59.3	8.34	0.0004	13089	85.87	FSLLCQAALEAPR
Q0DEV5	Granule-bound starch synthase 1, chloroplastic/amyloplastic OS=Oryza sativa subsp. japonica GN=WAXY PE=1 SV=1	67004	59.3	8.34	0.0004	13090	77.86	FSLLCQAALEAPR
Q0DEV5	Granule-bound starch synthase 1, chloroplastic/amyloplastic OS=Oryza sativa subsp. japonica GN=WAXY PE=1 SV=1	67004	59.3	8.34	-0.0004	13251	25.89	EALQAEAGLPVDRK
Q0DEV5	Granule-bound starch synthase 1, chloroplastic/amyloplastic OS=Oryza sativa subsp. japonica GN=WAXY PE=1 SV=1	67004	59.3	8.34	0	13253	54.4	EALQAEAGLPVDRK
Q0DEV5	Granule-bound starch synthase 1, chloroplastic/amyloplastic OS=Oryza sativa subsp. japonica GN=WAXY PE=1 SV=1	67004	59.3	8.34	0.0001	13254	53.01	EALQAEAGLPVDRK
Q0DEV5	Granule-bound starch synthase 1, chloroplastic/amyloplastic OS=Oryza sativa subsp. japonica GN=WAXY PE=1 SV=1	67004	59.3	8.34	0.0006	13337	65.22	YDATTAIEAKALNK
Q0DEV5	Granule-bound starch synthase 1, chloroplastic/amyloplastic OS=Oryza sativa subsp. japonica GN=WAXY PE=1 SV=1	67004	59.3	8.34	-0.001	14569	70.76	NCMNQDLSWKGPAK
Q0DEV5	Granule-bound starch synthase 1, chloroplastic/amyloplastic OS=Oryza sativa subsp. japonica GN=WAXY PE=1 SV=1	67004	59.3	8.34	-0.0009	14570	61.51	NCMNQDLSWKGPAK
Q0DEV5	Granule-bound starch synthase 1, chloroplastic/amyloplastic OS=Oryza sativa subsp. japonica GN=WAXY PE=1 SV=1	67004	59.3	8.34	0.0003	14675	31.99	NCMNQDLSWKGPAK
Q0DEV5	Granule-bound starch synthase 1, chloroplastic/amyloplastic OS=Oryza sativa subsp. japonica GN=WAXY PE=1 SV=1	67004	59.3	8.34	-0.0012	14868	42.44	LSVDCKVVEPSDVKK
Q0DEV5	Granule-bound starch synthase 1, chloroplastic/amyloplastic OS=Oryza sativa subsp. japonica GN=WAXY PE=1 SV=1	67004	59.3	8.34	-0.0006	15020	80.57	FAFEDYPELNLSER
Q0DEV5	Granule-bound starch synthase 1, chloroplastic/amyloplastic OS=Oryza sativa subsp. japonica GN=WAXY PE=1 SV=1	67004	59.3	8.34	-0.0001	15021	64.49	FAFEDYPELNLSER
Q0DEV5	Granule-bound starch synthase 1, chloroplastic/amyloplastic OS=Oryza sativa subsp. japonica GN=WAXY PE=1 SV=1	67004	59.3	8.34	-0.0001	15022	78.1	FAFEDYPELNLSER
Q0DEV5	Granule-bound starch synthase 1, chloroplastic/amyloplastic OS=Oryza sativa subsp. japonica GN=WAXY PE=1 SV=1	67004	59.3	8.34	0.0007	15023	65.8	FAFEDYPELNLSER
Q0DEV5	Granule-bound starch synthase 1, chloroplastic/amyloplastic OS=Oryza sativa subsp. japonica GN=WAXY PE=1 SV=1	67004	59.3	8.34	0.0008	15024	78.26	FAFEDYPELNLSER
Q0DEV5	Granule-bound starch synthase 1, chloroplastic/amyloplastic OS=Oryza sativa subsp. japonica GN=WAXY PE=1 SV=1	67004	59.3	8.34	0.001	15025	45.86	FAFEDYPELNLSER
Q0DEV5	Granule-bound starch synthase 1, chloroplastic/amyloplastic OS=Oryza sativa subsp. japonica GN=WAXY PE=1 SV=1	67004	59.3	8.34	-0.0033	15528	87.5	ALNKEALQAEAGLPVDR
Q0DEV5	Granule-bound starch synthase 1, chloroplastic/amyloplastic OS=Oryza sativa subsp. japonica GN=WAXY PE=1 SV=1	67004	59.3	8.34	-0.0011	15529	52.47	ALNKEALQAEAGLPVDR
Q0DEV5	Granule-bound starch synthase 1, chloroplastic/amyloplastic OS=Oryza sativa subsp. japonica GN=WAXY PE=1 SV=1	67004	59.3	8.34	-0.0008	15530	91.37	ALNKEALQAEAGLPVDR
Q0DEV5	Granule-bound starch synthase 1, chloroplastic/amyloplastic OS=Oryza sativa subsp. japonica GN=WAXY PE=1 SV=1	67004	59.3	8.34	-0.0006	15531	52.96	ALNKEALQAEAGLPVDR
Q0DEV5	Granule-bound starch synthase 1, chloroplastic/amyloplastic OS=Oryza sativa subsp. japonica GN=WAXY PE=1 SV=1	67004	59.3	8.34	0	15532	46.22	ALNKEALQAEAGLPVDR
Q0DEV5	Granule-bound starch synthase 1, chloroplastic/amyloplastic OS=Oryza sativa subsp. japonica GN=WAXY PE=1 SV=1	67004	59.3	8.34	0	15533	70.56	ALNKEALQAEAGLPVDR
Q0DEV5	Granule-bound starch synthase 1, chloroplastic/amyloplastic OS=Oryza sativa subsp. japonica GN=WAXY PE=1 SV=1	67004	59.3	8.34	0.0007	15534	106.02	ALNKEALQAEAGLPVDR
Q0DEV5	Granule-bound starch synthase 1, chloroplastic/amyloplastic OS=Oryza sativa subsp. japonica GN=WAXY PE=1 SV=1	67004	59.3	8.34	0.0007	15535	68.9	ALNKEALQAEAGLPVDR
Q0DEV5	Granule-bound starch synthase 1, chloroplastic/amyloplastic OS=Oryza sativa subsp. japonica GN=WAXY PE=1 SV=1	67004	59.3	8.34	0.0009	15536	52.27	ALNKEALQAEAGLPVDR
Q0DEV5	Granule-bound starch synthase 1, chloroplastic/amyloplastic OS=Oryza sativa subsp. japonica GN=WAXY PE=1 SV=1	67004	59.3	8.34	0.0018	15537	97.03	ALNKEALQAEAGLPVDR
Q0DEV5	Granule-bound starch synthase 1, chloroplastic/amyloplastic OS=Oryza sativa subsp. japonica GN=WAXY PE=1 SV=1	67004	59.3	8.34	0.0027	15538	54.24	ALNKEALQAEAGLPVDR
Q0DEV5	Granule-bound starch synthase 1, chloroplastic/amyloplastic OS=Oryza sativa subsp. japonica GN=WAXY PE=1 SV=1	67004	59.3	8.34	0.008	15539	68.7	ALNKEALQAEAGLPVDR
Q0DEV5	Granule-bound starch synthase 1, chloroplastic/amyloplastic OS=Oryza sativa subsp. japonica GN=WAXY PE=1 SV=1	67004	59.3	8.34	-0.0025	15569	67.63	SSFDFIDGYDTPVEGR
Q0DEV5	Granule-bound starch synthase 1, chloroplastic/amyloplastic OS=Oryza sativa subsp. japonica GN=WAXY PE=1 SV=1	67004	59.3	8.34	-0.0008	15570	94.69	SSFDFIDGYDTPVEGR
Q0DEV5	Granule-bound starch synthase 1, chloroplastic/amyloplastic OS=Oryza sativa subsp. japonica GN=WAXY PE=1 SV=1	67004	59.3	8.34	-0.0005	15571	63.64	SSFDFIDGYDTPVEGR
Q0DEV5	Granule-bound starch synthase 1, chloroplastic/amyloplastic OS=Oryza sativa subsp. japonica GN=WAXY PE=1 SV=1	67004	59.3	8.34	-0.0005	15572	53.51	SSFDFIDGYDTPVEGR
Q0DEV5	Granule-bound starch synthase 1, chloroplastic/amyloplastic OS=Oryza sativa subsp. japonica GN=WAXY PE=1 SV=1	67004	59.3	8.34	-0.0004	15573	81.29	SSFDFIDGYDTPVEGR
Q0DEV5	Granule-bound starch synthase 1, chloroplastic/amyloplastic OS=Oryza sativa subsp. japonica GN=WAXY PE=1 SV=1	67004	59.3	8.34	-0.0003	15574	87.7	SSFDFIDGYDTPVEGR
Q0DEV5	Granule-bound starch synthase 1, chloroplastic/amyloplastic OS=Oryza sativa subsp. japonica GN=WAXY PE=1 SV=1	67004	59.3	8.34	0	15575	100.71	SSFDFIDGYDTPVEGR
Q0DEV5	Granule-bound starch synthase 1, chloroplastic/amyloplastic OS=Oryza sativa subsp. japonica GN=WAXY PE=1 SV=1	67004	59.3	8.34	0.0006	15576	47.24	SSFDFIDGYDTPVEGR
Q0DEV5	Granule-bound starch synthase 1, chloroplastic/amyloplastic OS=Oryza sativa subsp. japonica GN=WAXY PE=1 SV=1	67004	59.3	8.34	0.0006	15577	29.73	SSFDFIDGYDTPVEGR
Q0DEV5	Granule-bound starch synthase 1, chloroplastic/amyloplastic OS=Oryza sativa subsp. japonica GN=WAXY PE=1 SV=1	67004	59.3	8.34	0.0008	15578	88.04	SSFDFIDGYDTPVEGR
Q0DEV5	Granule-bound starch synthase 1, chloroplastic/amyloplastic OS=Oryza sativa subsp. japonica GN=WAXY PE=1 SV=1	67004	59.3	8.34	0.0012	15579	77.47	SSFDFIDGYDTPVEGR
Q0DEV5	Granule-bound starch synthase 1, chloroplastic/amyloplastic OS=Oryza sativa subsp. japonica GN=WAXY PE=1 SV=1	67004	59.3	8.34	0.0015	15580	29.64	SSFDFIDGYDTPVEGR
Q0DEV5	Granule-bound starch synthase 1, chloroplastic/amyloplastic OS=Oryza sativa subsp. japonica GN=WAXY PE=1 SV=1	67004	59.3	8.34	0.003	15581	64.4	SSFDFIDGYDTPVEGR
Q0DEV5	Granule-bound starch synthase 1, chloroplastic/amyloplastic OS=Oryza sativa subsp. japonica GN=WAXY PE=1 SV=1	67004	59.3	8.34	-0.0063	15795	36.93	IYGPDTGVDYKDNQMR
Q0DEV5	Granule-bound starch synthase 1, chloroplastic/amyloplastic OS=Oryza sativa subsp. japonica GN=WAXY PE=1 SV=1	67004	59.3	8.34	-0.0051	15796	73.5	IYGPDTGVDYKDNQMR
Q0DEV5	Granule-bound starch synthase 1, chloroplastic/amyloplastic OS=Oryza sativa subsp. japonica GN=WAXY PE=1 SV=1	67004	59.3	8.34	-0.0034	15797	40.68	IYGPDTGVDYKDNQMR
Q0DEV5	Granule-bound starch synthase 1, chloroplastic/amyloplastic OS=Oryza sativa subsp. japonica GN=WAXY PE=1 SV=1	67004	59.3	8.34	-0.001	15798	49.2	IYGPDTGVDYKDNQMR
Q0DEV5	Granule-bound starch synthase 1, chloroplastic/amyloplastic OS=Oryza sativa subsp. japonica GN=WAXY PE=1 SV=1	67004	59.3	8.34	-0.0006	15799	56.33	IYGPDTGVDYKDNQMR
Q0DEV5	Granule-bound starch synthase 1, chloroplastic/amyloplastic OS=Oryza sativa subsp. japonica GN=WAXY PE=1 SV=1	67004	59.3	8.34	-0.0004	15800	52.95	IYGPDTGVDYKDNQMR
Q0DEV5	Granule-bound starch synthase 1, chloroplastic/amyloplastic OS=Oryza sativa subsp. japonica GN=WAXY PE=1 SV=1	67004	59.3	8.34	-0.0004	15801	90.72	IYGPDTGVDYKDNQMR
Q0DEV5	Granule-bound starch synthase 1, chloroplastic/amyloplastic OS=Oryza sativa subsp. japonica GN=WAXY PE=1 SV=1	67004	59.3	8.34	-0.0001	15802	65.59	IYGPDTGVDYKDNQMR
Q0DEV5	Granule-bound starch synthase 1, chloroplastic/amyloplastic OS=Oryza sativa subsp. japonica GN=WAXY PE=1 SV=1	67004	59.3	8.34	0.0002	15803	73.38	IYGPDTGVDYKDNQMR
Q0DEV5	Granule-bound starch synthase 1, chloroplastic/amyloplastic OS=Oryza sativa subsp. japonica GN=WAXY PE=1 SV=1	67004	59.3	8.34	0.0007	15805	57.97	IYGPDTGVDYKDNQMR
Q0DEV5	Granule-bound starch synthase 1, chloroplastic/amyloplastic OS=Oryza sativa subsp. japonica GN=WAXY PE=1 SV=1	67004	59.3	8.34	0.0014	15806	60.87	IYGPDTGVDYKDNQMR
Q0DEV5	Granule-bound starch synthase 1, chloroplastic/amyloplastic OS=Oryza sativa subsp. japonica GN=WAXY PE=1 SV=1	67004	59.3	8.34	0.004	15808	101.53	IYGPDTGVDYKDNQMR
Q0DEV5	Granule-bound starch synthase 1, chloroplastic/amyloplastic OS=Oryza sativa subsp. japonica GN=WAXY PE=1 SV=1	67004	59.3	8.34	-0.0037	15854	48.91	IYGPDTGVDYKDNQMR
Q0DEV5	Granule-bound starch synthase 1, chloroplastic/amyloplastic OS=Oryza sativa subsp. japonica GN=WAXY PE=1 SV=1	67004	59.3	8.34	-0.0016	15855	46.34	IYGPDTGVDYKDNQMR
Q0DEV5	Granule-bound starch synthase 1, chloroplastic/amyloplastic OS=Oryza sativa subsp. japonica GN=WAXY PE=1 SV=1	67004	59.3	8.34	-0.0007	15857	37.67	IYGPDTGVDYKDNQMR
Q0DEV5	Granule-bound starch synthase 1, chloroplastic/amyloplastic OS=Oryza sativa subsp. japonica GN=WAXY PE=1 SV=1	67004	59.3	8.34	-0.0003	15858	33.97	IYGPDTGVDYKDNQMR
Q0DEV5	Granule-bound starch synthase 1, chloroplastic/amyloplastic OS=Oryza sativa subsp. japonica GN=WAXY PE=1 SV=1	67004	59.3	8.34	0	15859	42.51	IYGPDTGVDYKDNQMR
Q0DEV5	Granule-bound starch synthase 1, chloroplastic/amyloplastic OS=Oryza sativa subsp. japonica GN=WAXY PE=1 SV=1	67004	59.3	8.34	0.0006	15860	30.8	IYGPDTGVDYKDNQMR
Q0DEV5	Granule-bound starch synthase 1, chloroplastic/amyloplastic OS=Oryza sativa subsp. japonica GN=WAXY PE=1 SV=1	67004	59.3	8.34	0.0006	15861	48.48	IYGPDTGVDYKDNQMR
Q0DEV5	Granule-bound starch synthase 1, chloroplastic/amyloplastic OS=Oryza sativa subsp. japonica GN=WAXY PE=1 SV=1	67004	59.3	8.34	0.0019	15863	53.45	IYGPDTGVDYKDNQMR
Q0DEV5	Granule-bound starch synthase 1, chloroplastic/amyloplastic OS=Oryza sativa subsp. japonica GN=WAXY PE=1 SV=1	67004	59.3	8.34	-0.0004	16052	67.88	VLTVSPYYAEELISGIAR
Q0DEV5	Granule-bound starch synthase 1, chloroplastic/amyloplastic OS=Oryza sativa subsp. japonica GN=WAXY PE=1 SV=1	67004	59.3	8.34	0.0001	16053	118.45	VLTVSPYYAEELISGIAR
Q0DEV5	Granule-bound starch synthase 1, chloroplastic/amyloplastic OS=Oryza sativa subsp. japonica GN=WAXY PE=1 SV=1	67004	59.3	8.34	0.0007	16054	24.6	VLTVSPYYAEELISGIAR
Q0DEV5	Granule-bound starch synthase 1, chloroplastic/amyloplastic OS=Oryza sativa subsp. japonica GN=WAXY PE=1 SV=1	67004	59.3	8.34	0.0016	16055	118.93	VLTVSPYYAEELISGIAR
Q0DEV5	Granule-bound starch synthase 1, chloroplastic/amyloplastic OS=Oryza sativa subsp. japonica GN=WAXY PE=1 SV=1	67004	59.3	8.34	0.0024	16056	83.46	VLTVSPYYAEELISGIAR
Q0DEV5	Granule-bound starch synthase 1, chloroplastic/amyloplastic OS=Oryza sativa subsp. japonica GN=WAXY PE=1 SV=1	67004	59.3	8.34	0.0057	16057	88.57	VLTVSPYYAEELISGIAR
Q0DEV5	Granule-bound starch synthase 1, chloroplastic/amyloplastic OS=Oryza sativa subsp. japonica GN=WAXY PE=1 SV=1	67004	59.3	8.34	0.0058	16058	100.38	VLTVSPYYAEELISGIAR
Q0DEV5	Granule-bound starch synthase 1, chloroplastic/amyloplastic OS=Oryza sativa subsp. japonica GN=WAXY PE=1 SV=1	67004	59.3	8.34	-0.005	16192	22.95	YDQYKDAWDTSVVAEIK
Q0DEV5	Granule-bound starch synthase 1, chloroplastic/amyloplastic OS=Oryza sativa subsp. japonica GN=WAXY PE=1 SV=1	67004	59.3	8.34	-0.0032	16194	42.28	YDQYKDAWDTSVVAEIK
Q0DEV5	Granule-bound starch synthase 1, chloroplastic/amyloplastic OS=Oryza sativa subsp. japonica GN=WAXY PE=1 SV=1	67004	59.3	8.34	-0.0024	16195	24.97	YDQYKDAWDTSVVAEIK
Q0DEV5	Granule-bound starch synthase 1, chloroplastic/amyloplastic OS=Oryza sativa subsp. japonica GN=WAXY PE=1 SV=1	67004	59.3	8.34	-0.0022	16196	38.46	YDQYKDAWDTSVVAEIK
Q0DEV5	Granule-bound starch synthase 1, chloroplastic/amyloplastic OS=Oryza sativa subsp. japonica GN=WAXY PE=1 SV=1	67004	59.3	8.34	-0.0006	16197	26.15	YDQYKDAWDTSVVAEIK
Q0DEV5	Granule-bound starch synthase 1, chloroplastic/amyloplastic OS=Oryza sativa subsp. japonica GN=WAXY PE=1 SV=1	67004	59.3	8.34	0.0034	16199	59.65	YDQYKDAWDTSVVAEIK
Q0DEV5	Granule-bound starch synthase 1, chloroplastic/amyloplastic OS=Oryza sativa subsp. japonica GN=WAXY PE=1 SV=1	67004	59.3	8.34	0.0043	16200	56.77	YDQYKDAWDTSVVAEIK
Q0DEV5	Granule-bound starch synthase 1, chloroplastic/amyloplastic OS=Oryza sativa subsp. japonica GN=WAXY PE=1 SV=1	67004	59.3	8.34	-0.0057	16463	51.49	YGTPCACASTGGLVDTVIEGK
Q0DEV5	Granule-bound starch synthase 1, chloroplastic/amyloplastic OS=Oryza sativa subsp. japonica GN=WAXY PE=1 SV=1	67004	59.3	8.34	-0.0046	16464	44.27	YGTPCACASTGGLVDTVIEGK
Q0DEV5	Granule-bound starch synthase 1, chloroplastic/amyloplastic OS=Oryza sativa subsp. japonica GN=WAXY PE=1 SV=1	67004	59.3	8.34	-0.0044	16465	35.88	YGTPCACASTGGLVDTVIEGK
Q0DEV5	Granule-bound starch synthase 1, chloroplastic/amyloplastic OS=Oryza sativa subsp. japonica GN=WAXY PE=1 SV=1	67004	59.3	8.34	-0.004	16466	124.72	YGTPCACASTGGLVDTVIEGK
Q0DEV5	Granule-bound starch synthase 1, chloroplastic/amyloplastic OS=Oryza sativa subsp. japonica GN=WAXY PE=1 SV=1	67004	59.3	8.34	-0.003	16467	107.92	YGTPCACASTGGLVDTVIEGK
Q0DEV5	Granule-bound starch synthase 1, chloroplastic/amyloplastic OS=Oryza sativa subsp. japonica GN=WAXY PE=1 SV=1	67004	59.3	8.34	-0.0028	16468	74.77	YGTPCACASTGGLVDTVIEGK
Q0DEV5	Granule-bound starch synthase 1, chloroplastic/amyloplastic OS=Oryza sativa subsp. japonica GN=WAXY PE=1 SV=1	67004	59.3	8.34	-0.0027	16469	51.03	YGTPCACASTGGLVDTVIEGK
Q0DEV5	Granule-bound starch synthase 1, chloroplastic/amyloplastic OS=Oryza sativa subsp. japonica GN=WAXY PE=1 SV=1	67004	59.3	8.34	-0.0025	16470	99.38	YGTPCACASTGGLVDTVIEGK
Q0DEV5	Granule-bound starch synthase 1, chloroplastic/amyloplastic OS=Oryza sativa subsp. japonica GN=WAXY PE=1 SV=1	67004	59.3	8.34	-0.0019	16471	60.75	YGTPCACASTGGLVDTVIEGK
Q0DEV5	Granule-bound starch synthase 1, chloroplastic/amyloplastic OS=Oryza sativa subsp. japonica GN=WAXY PE=1 SV=1	67004	59.3	8.34	-0.0013	16472	69.86	YGTPCACASTGGLVDTVIEGK
Q0DEV5	Granule-bound starch synthase 1, chloroplastic/amyloplastic OS=Oryza sativa subsp. japonica GN=WAXY PE=1 SV=1	67004	59.3	8.34	-0.0007	16473	66.73	YGTPCACASTGGLVDTVIEGK
Q0DEV5	Granule-bound starch synthase 1, chloroplastic/amyloplastic OS=Oryza sativa subsp. japonica GN=WAXY PE=1 SV=1	67004	59.3	8.34	-0.0005	16474	126.6	YGTPCACASTGGLVDTVIEGK
Q0DEV5	Granule-bound starch synthase 1, chloroplastic/amyloplastic OS=Oryza sativa subsp. japonica GN=WAXY PE=1 SV=1	67004	59.3	8.34	-0.0005	16475	93.89	YGTPCACASTGGLVDTVIEGK
Q0DEV5	Granule-bound starch synthase 1, chloroplastic/amyloplastic OS=Oryza sativa subsp. japonica GN=WAXY PE=1 SV=1	67004	59.3	8.34	-0.0005	16476	110.45	YGTPCACASTGGLVDTVIEGK
Q0DEV5	Granule-bound starch synthase 1, chloroplastic/amyloplastic OS=Oryza sativa subsp. japonica GN=WAXY PE=1 SV=1	67004	59.3	8.34	-0.0003	16477	112.22	YGTPCACASTGGLVDTVIEGK
Q0DEV5	Granule-bound starch synthase 1, chloroplastic/amyloplastic OS=Oryza sativa subsp. japonica GN=WAXY PE=1 SV=1	67004	59.3	8.34	-0.0003	16478	148	YGTPCACASTGGLVDTVIEGK
Q0DEV5	Granule-bound starch synthase 1, chloroplastic/amyloplastic OS=Oryza sativa subsp. japonica GN=WAXY PE=1 SV=1	67004	59.3	8.34	-0.0002	16479	81.48	YGTPCACASTGGLVDTVIEGK
Q0DEV5	Granule-bound starch synthase 1, chloroplastic/amyloplastic OS=Oryza sativa subsp. japonica GN=WAXY PE=1 SV=1	67004	59.3	8.34	-0.0001	16480	126.67	YGTPCACASTGGLVDTVIEGK
Q0DEV5	Granule-bound starch synthase 1, chloroplastic/amyloplastic OS=Oryza sativa subsp. japonica GN=WAXY PE=1 SV=1	67004	59.3	8.34	0.0002	16481	131.43	YGTPCACASTGGLVDTVIEGK
Q0DEV5	Granule-bound starch synthase 1, chloroplastic/amyloplastic OS=Oryza sativa subsp. japonica GN=WAXY PE=1 SV=1	67004	59.3	8.34	0.0002	16482	121.27	YGTPCACASTGGLVDTVIEGK
Q0DEV5	Granule-bound starch synthase 1, chloroplastic/amyloplastic OS=Oryza sativa subsp. japonica GN=WAXY PE=1 SV=1	67004	59.3	8.34	0.0002	16483	100.57	YGTPCACASTGGLVDTVIEGK
Q0DEV5	Granule-bound starch synthase 1, chloroplastic/amyloplastic OS=Oryza sativa subsp. japonica GN=WAXY PE=1 SV=1	67004	59.3	8.34	0.0004	16484	123.72	YGTPCACASTGGLVDTVIEGK
Q0DEV5	Granule-bound starch synthase 1, chloroplastic/amyloplastic OS=Oryza sativa subsp. japonica GN=WAXY PE=1 SV=1	67004	59.3	8.34	0.0007	16485	127.27	YGTPCACASTGGLVDTVIEGK
Q0DEV5	Granule-bound starch synthase 1, chloroplastic/amyloplastic OS=Oryza sativa subsp. japonica GN=WAXY PE=1 SV=1	67004	59.3	8.34	0.0019	16486	147.27	YGTPCACASTGGLVDTVIEGK
Q0DEV5	Granule-bound starch synthase 1, chloroplastic/amyloplastic OS=Oryza sativa subsp. japonica GN=WAXY PE=1 SV=1	67004	59.3	8.34	0.0026	16487	79.93	YGTPCACASTGGLVDTVIEGK
Q0DEV5	Granule-bound starch synthase 1, chloroplastic/amyloplastic OS=Oryza sativa subsp. japonica GN=WAXY PE=1 SV=1	67004	59.3	8.34	0.0026	16488	49.64	YGTPCACASTGGLVDTVIEGK
Q0DEV5	Granule-bound starch synthase 1, chloroplastic/amyloplastic OS=Oryza sativa subsp. japonica GN=WAXY PE=1 SV=1	67004	59.3	8.34	0.0042	16504	91.29	FNAPLAHLIMAGADVLAVPSR
Q0DEV5	Granule-bound starch synthase 1, chloroplastic/amyloplastic OS=Oryza sativa subsp. japonica GN=WAXY PE=1 SV=1	67004	59.3	8.34	0.0024	16976	63.13	GPDVMAAAIPELMQEDVQIVLLGTGK
Q0DEV5	Granule-bound starch synthase 1, chloroplastic/amyloplastic OS=Oryza sativa subsp. japonica GN=WAXY PE=1 SV=1	67004	59.3	8.34	0.0026	17012	111.32	NWENVLLGLGVAGSAPGIEGDEIAPLAK
Q0DEV5	Granule-bound starch synthase 1, chloroplastic/amyloplastic OS=Oryza sativa subsp. japonica GN=WAXY PE=1 SV=1	67004	59.3	8.34	0.0079	17013	136.82	NWENVLLGLGVAGSAPGIEGDEIAPLAK
Q2QV45	70 kDa heat shock protein OS=Oryza sativa subsp. japonica GN=LOC_Os12g14070 PE=2 SV=1	74269	51.7	5.11	-0.0007	285	20.74	LVGQIAK
Q2QV45	70 kDa heat shock protein OS=Oryza sativa subsp. japonica GN=LOC_Os12g14070 PE=2 SV=1	74269	51.7	5.11	-0.0002	286	20.52	LVGQIAK
Q2QV45	70 kDa heat shock protein OS=Oryza sativa subsp. japonica GN=LOC_Os12g14070 PE=2 SV=1	74269	51.7	5.11	0.001	2574	57.77	IAGLEVLR
Q2QV45	70 kDa heat shock protein OS=Oryza sativa subsp. japonica GN=LOC_Os12g14070 PE=2 SV=1	74269	51.7	5.11	-0.0011	2585	22.91	TPVTNALR
Q2QV45	70 kDa heat shock protein OS=Oryza sativa subsp. japonica GN=LOC_Os12g14070 PE=2 SV=1	74269	51.7	5.11	-0.0005	2587	33.66	TPVTNALR
Q2QV45	70 kDa heat shock protein OS=Oryza sativa subsp. japonica GN=LOC_Os12g14070 PE=2 SV=1	74269	51.7	5.11	-0.0004	2588	41.29	TPVTNALR
Q2QV45	70 kDa heat shock protein OS=Oryza sativa subsp. japonica GN=LOC_Os12g14070 PE=2 SV=1	74269	51.7	5.11	-0.0004	2589	24.15	TPVTNALR
Q2QV45	70 kDa heat shock protein OS=Oryza sativa subsp. japonica GN=LOC_Os12g14070 PE=2 SV=1	74269	51.7	5.11	-0.0001	2591	48.52	TPVTNALR
Q2QV45	70 kDa heat shock protein OS=Oryza sativa subsp. japonica GN=LOC_Os12g14070 PE=2 SV=1	74269	51.7	5.11	0	2592	32.67	TPVTNALR
Q2QV45	70 kDa heat shock protein OS=Oryza sativa subsp. japonica GN=LOC_Os12g14070 PE=2 SV=1	74269	51.7	5.11	0.0002	2593	27.71	TPVTNALR
Q2QV45	70 kDa heat shock protein OS=Oryza sativa subsp. japonica GN=LOC_Os12g14070 PE=2 SV=1	74269	51.7	5.11	0.0003	2594	40.5	TPVTNALR
Q2QV45	70 kDa heat shock protein OS=Oryza sativa subsp. japonica GN=LOC_Os12g14070 PE=2 SV=1	74269	51.7	5.11	-0.0002	2628	36.24	LDCPAIGK
Q2QV45	70 kDa heat shock protein OS=Oryza sativa subsp. japonica GN=LOC_Os12g14070 PE=2 SV=1	74269	51.7	5.11	-0.0002	2630	39.73	LDCPAIGK
Q2QV45	70 kDa heat shock protein OS=Oryza sativa subsp. japonica GN=LOC_Os12g14070 PE=2 SV=1	74269	51.7	5.11	-0.0001	2631	55.52	LDCPAIGK
Q2QV45	70 kDa heat shock protein OS=Oryza sativa subsp. japonica GN=LOC_Os12g14070 PE=2 SV=1	74269	51.7	5.11	-0.0001	2632	38.77	LDCPAIGK
Q2QV45	70 kDa heat shock protein OS=Oryza sativa subsp. japonica GN=LOC_Os12g14070 PE=2 SV=1	74269	51.7	5.11	-0.0001	2633	22.39	LDCPAIGK
Q2QV45	70 kDa heat shock protein OS=Oryza sativa subsp. japonica GN=LOC_Os12g14070 PE=2 SV=1	74269	51.7	5.11	0	2634	49.42	LDCPAIGK
Q2QV45	70 kDa heat shock protein OS=Oryza sativa subsp. japonica GN=LOC_Os12g14070 PE=2 SV=1	74269	51.7	5.11	0	2635	43.83	LDCPAIGK
Q2QV45	70 kDa heat shock protein OS=Oryza sativa subsp. japonica GN=LOC_Os12g14070 PE=2 SV=1	74269	51.7	5.11	0	2636	44.47	LDCPAIGK
Q2QV45	70 kDa heat shock protein OS=Oryza sativa subsp. japonica GN=LOC_Os12g14070 PE=2 SV=1	74269	51.7	5.11	0.0001	2637	48.38	LDCPAIGK
Q2QV45	70 kDa heat shock protein OS=Oryza sativa subsp. japonica GN=LOC_Os12g14070 PE=2 SV=1	74269	51.7	5.11	0.0001	2638	37.4	LDCPAIGK
Q2QV45	70 kDa heat shock protein OS=Oryza sativa subsp. japonica GN=LOC_Os12g14070 PE=2 SV=1	74269	51.7	5.11	0.0003	2639	39.99	LDCPAIGK
Q2QV45	70 kDa heat shock protein OS=Oryza sativa subsp. japonica GN=LOC_Os12g14070 PE=2 SV=1	74269	51.7	5.11	0.0003	2640	49.68	LDCPAIGK
Q2QV45	70 kDa heat shock protein OS=Oryza sativa subsp. japonica GN=LOC_Os12g14070 PE=2 SV=1	74269	51.7	5.11	-0.0007	3889	28.23	HIETTLSR
Q2QV45	70 kDa heat shock protein OS=Oryza sativa subsp. japonica GN=LOC_Os12g14070 PE=2 SV=1	74269	51.7	5.11	0.0004	4949	42.05	MAEVDDEAK
Q2QV45	70 kDa heat shock protein OS=Oryza sativa subsp. japonica GN=LOC_Os12g14070 PE=2 SV=1	74269	51.7	5.11	-0.0001	5084	46.63	IPSVQELVK
Q2QV45	70 kDa heat shock protein OS=Oryza sativa subsp. japonica GN=LOC_Os12g14070 PE=2 SV=1	74269	51.7	5.11	0.0001	5297	50.31	MAEVDDEAK
Q2QV45	70 kDa heat shock protein OS=Oryza sativa subsp. japonica GN=LOC_Os12g14070 PE=2 SV=1	74269	51.7	5.11	0.0015	5298	35.21	MAEVDDEAK
Q2QV45	70 kDa heat shock protein OS=Oryza sativa subsp. japonica GN=LOC_Os12g14070 PE=2 SV=1	74269	51.7	5.11	0.0005	6083	27.31	TTPSVVAYTK
Q2QV45	70 kDa heat shock protein OS=Oryza sativa subsp. japonica GN=LOC_Os12g14070 PE=2 SV=1	74269	51.7	5.11	0.0006	6084	45.59	TTPSVVAYTK
Q2QV45	70 kDa heat shock protein OS=Oryza sativa subsp. japonica GN=LOC_Os12g14070 PE=2 SV=1	74269	51.7	5.11	0.0006	6085	47.75	TTPSVVAYTK
Q2QV45	70 kDa heat shock protein OS=Oryza sativa subsp. japonica GN=LOC_Os12g14070 PE=2 SV=1	74269	51.7	5.11	0.0009	6088	47.98	TTPSVVAYTK
Q2QV45	70 kDa heat shock protein OS=Oryza sativa subsp. japonica GN=LOC_Os12g14070 PE=2 SV=1	74269	51.7	5.11	0.0009	6089	35.28	TTPSVVAYTK
Q2QV45	70 kDa heat shock protein OS=Oryza sativa subsp. japonica GN=LOC_Os12g14070 PE=2 SV=1	74269	51.7	5.11	0.0012	6090	34.49	TTPSVVAYTK
Q2QV45	70 kDa heat shock protein OS=Oryza sativa subsp. japonica GN=LOC_Os12g14070 PE=2 SV=1	74269	51.7	5.11	0.0026	6092	26.8	TTPSVVAYTK
Q2QV45	70 kDa heat shock protein OS=Oryza sativa subsp. japonica GN=LOC_Os12g14070 PE=2 SV=1	74269	51.7	5.11	0.0005	6966	25.07	LKTPVTNALR
Q2QV45	70 kDa heat shock protein OS=Oryza sativa subsp. japonica GN=LOC_Os12g14070 PE=2 SV=1	74269	51.7	5.11	-0.0001	7526	22.57	KMAEVDDEAK
Q2QV45	70 kDa heat shock protein OS=Oryza sativa subsp. japonica GN=LOC_Os12g14070 PE=2 SV=1	74269	51.7	5.11	0.0009	7527	66.73	KMAEVDDEAK
Q2QV45	70 kDa heat shock protein OS=Oryza sativa subsp. japonica GN=LOC_Os12g14070 PE=2 SV=1	74269	51.7	5.11	0.0001	7796	23.88	DEGIDLLKDK
Q2QV45	70 kDa heat shock protein OS=Oryza sativa subsp. japonica GN=LOC_Os12g14070 PE=2 SV=1	74269	51.7	5.11	0.0003	7797	30.54	DEGIDLLKDK
Q2QV45	70 kDa heat shock protein OS=Oryza sativa subsp. japonica GN=LOC_Os12g14070 PE=2 SV=1	74269	51.7	5.11	-0.0002	7925	30.7	ELGDKVPAPVK
Q2QV45	70 kDa heat shock protein OS=Oryza sativa subsp. japonica GN=LOC_Os12g14070 PE=2 SV=1	74269	51.7	5.11	-0.0008	8450	33.3	EAIAGGSTQSMK
Q2QV45	70 kDa heat shock protein OS=Oryza sativa subsp. japonica GN=LOC_Os12g14070 PE=2 SV=1	74269	51.7	5.11	-0.0022	11989	52.61	NQADSVVYQTEK
Q2QV45	70 kDa heat shock protein OS=Oryza sativa subsp. japonica GN=LOC_Os12g14070 PE=2 SV=1	74269	51.7	5.11	-0.0019	11990	55.94	NQADSVVYQTEK
Q2QV45	70 kDa heat shock protein OS=Oryza sativa subsp. japonica GN=LOC_Os12g14070 PE=2 SV=1	74269	51.7	5.11	-0.0015	11991	64.68	NQADSVVYQTEK
Q2QV45	70 kDa heat shock protein OS=Oryza sativa subsp. japonica GN=LOC_Os12g14070 PE=2 SV=1	74269	51.7	5.11	-0.0013	11992	50.17	NQADSVVYQTEK
Q2QV45	70 kDa heat shock protein OS=Oryza sativa subsp. japonica GN=LOC_Os12g14070 PE=2 SV=1	74269	51.7	5.11	-0.001	11993	73.85	NQADSVVYQTEK
Q2QV45	70 kDa heat shock protein OS=Oryza sativa subsp. japonica GN=LOC_Os12g14070 PE=2 SV=1	74269	51.7	5.11	-0.0008	11994	55.43	NQADSVVYQTEK
Q2QV45	70 kDa heat shock protein OS=Oryza sativa subsp. japonica GN=LOC_Os12g14070 PE=2 SV=1	74269	51.7	5.11	-0.0008	11995	54.76	NQADSVVYQTEK
Q2QV45	70 kDa heat shock protein OS=Oryza sativa subsp. japonica GN=LOC_Os12g14070 PE=2 SV=1	74269	51.7	5.11	-0.0006	11996	76.12	NQADSVVYQTEK
Q2QV45	70 kDa heat shock protein OS=Oryza sativa subsp. japonica GN=LOC_Os12g14070 PE=2 SV=1	74269	51.7	5.11	-0.0006	11997	60.29	NQADSVVYQTEK
Q2QV45	70 kDa heat shock protein OS=Oryza sativa subsp. japonica GN=LOC_Os12g14070 PE=2 SV=1	74269	51.7	5.11	-0.0004	11998	78.78	NQADSVVYQTEK
Q2QV45	70 kDa heat shock protein OS=Oryza sativa subsp. japonica GN=LOC_Os12g14070 PE=2 SV=1	74269	51.7	5.11	-0.0004	11999	78.68	NQADSVVYQTEK
Q2QV45	70 kDa heat shock protein OS=Oryza sativa subsp. japonica GN=LOC_Os12g14070 PE=2 SV=1	74269	51.7	5.11	-0.0004	12000	61.21	NQADSVVYQTEK
Q2QV45	70 kDa heat shock protein OS=Oryza sativa subsp. japonica GN=LOC_Os12g14070 PE=2 SV=1	74269	51.7	5.11	-0.0004	12001	73.58	NQADSVVYQTEK
Q2QV45	70 kDa heat shock protein OS=Oryza sativa subsp. japonica GN=LOC_Os12g14070 PE=2 SV=1	74269	51.7	5.11	-0.0003	12002	78.62	NQADSVVYQTEK
Q2QV45	70 kDa heat shock protein OS=Oryza sativa subsp. japonica GN=LOC_Os12g14070 PE=2 SV=1	74269	51.7	5.11	-0.0003	12003	78.49	NQADSVVYQTEK
Q2QV45	70 kDa heat shock protein OS=Oryza sativa subsp. japonica GN=LOC_Os12g14070 PE=2 SV=1	74269	51.7	5.11	-0.0002	12004	73.92	NQADSVVYQTEK
Q2QV45	70 kDa heat shock protein OS=Oryza sativa subsp. japonica GN=LOC_Os12g14070 PE=2 SV=1	74269	51.7	5.11	-0.0002	12005	73.75	NQADSVVYQTEK
Q2QV45	70 kDa heat shock protein OS=Oryza sativa subsp. japonica GN=LOC_Os12g14070 PE=2 SV=1	74269	51.7	5.11	-0.0002	12006	78.66	NQADSVVYQTEK
Q2QV45	70 kDa heat shock protein OS=Oryza sativa subsp. japonica GN=LOC_Os12g14070 PE=2 SV=1	74269	51.7	5.11	-0.0002	12007	78.96	NQADSVVYQTEK
Q2QV45	70 kDa heat shock protein OS=Oryza sativa subsp. japonica GN=LOC_Os12g14070 PE=2 SV=1	74269	51.7	5.11	0	12008	79.27	NQADSVVYQTEK
Q2QV45	70 kDa heat shock protein OS=Oryza sativa subsp. japonica GN=LOC_Os12g14070 PE=2 SV=1	74269	51.7	5.11	0	12009	79.27	NQADSVVYQTEK
Q2QV45	70 kDa heat shock protein OS=Oryza sativa subsp. japonica GN=LOC_Os12g14070 PE=2 SV=1	74269	51.7	5.11	0.0001	12010	79.19	NQADSVVYQTEK
Q2QV45	70 kDa heat shock protein OS=Oryza sativa subsp. japonica GN=LOC_Os12g14070 PE=2 SV=1	74269	51.7	5.11	0.0001	12011	78.92	NQADSVVYQTEK
Q2QV45	70 kDa heat shock protein OS=Oryza sativa subsp. japonica GN=LOC_Os12g14070 PE=2 SV=1	74269	51.7	5.11	0.0006	12012	78.39	NQADSVVYQTEK
Q2QV45	70 kDa heat shock protein OS=Oryza sativa subsp. japonica GN=LOC_Os12g14070 PE=2 SV=1	74269	51.7	5.11	0.0016	12013	78.36	NQADSVVYQTEK
Q2QV45	70 kDa heat shock protein OS=Oryza sativa subsp. japonica GN=LOC_Os12g14070 PE=2 SV=1	74269	51.7	5.11	0.0062	12014	34	NQADSVVYQTEK
Q2QV45	70 kDa heat shock protein OS=Oryza sativa subsp. japonica GN=LOC_Os12g14070 PE=2 SV=1	74269	51.7	5.11	0.0002	12246	45.09	FEELCSDLIDR
Q2QV45	70 kDa heat shock protein OS=Oryza sativa subsp. japonica GN=LOC_Os12g14070 PE=2 SV=1	74269	51.7	5.11	0.0011	12972	68.06	QFAAEEISAQVLR
Q2QV45	70 kDa heat shock protein OS=Oryza sativa subsp. japonica GN=LOC_Os12g14070 PE=2 SV=1	74269	51.7	5.11	0.001	13564	23.49	MVEEADKFAQEDK
Q2QV45	70 kDa heat shock protein OS=Oryza sativa subsp. japonica GN=LOC_Os12g14070 PE=2 SV=1	74269	51.7	5.11	0.0037	13710	31.72	MVEEADKFAQEDK
Q2QV45	70 kDa heat shock protein OS=Oryza sativa subsp. japonica GN=LOC_Os12g14070 PE=2 SV=1	74269	51.7	5.11	-0.0016	13827	39.24	AVVTVPAYFNDSQR
Q2QV45	70 kDa heat shock protein OS=Oryza sativa subsp. japonica GN=LOC_Os12g14070 PE=2 SV=1	74269	51.7	5.11	0	13828	49.76	AVVTVPAYFNDSQR
Q2QV45	70 kDa heat shock protein OS=Oryza sativa subsp. japonica GN=LOC_Os12g14070 PE=2 SV=1	74269	51.7	5.11	0.0001	13999	63.32	QAVVNPENTFFSVK
Q2QV45	70 kDa heat shock protein OS=Oryza sativa subsp. japonica GN=LOC_Os12g14070 PE=2 SV=1	74269	51.7	5.11	-0.0037	14588	33.32	GPNDGDVIDADFTDSN
Q2QV45	70 kDa heat shock protein OS=Oryza sativa subsp. japonica GN=LOC_Os12g14070 PE=2 SV=1	74269	51.7	5.11	-0.0018	14589	24.77	GPNDGDVIDADFTDSN
Q2QV45	70 kDa heat shock protein OS=Oryza sativa subsp. japonica GN=LOC_Os12g14070 PE=2 SV=1	74269	51.7	5.11	-0.0014	14590	28.07	GPNDGDVIDADFTDSN
Q2QV45	70 kDa heat shock protein OS=Oryza sativa subsp. japonica GN=LOC_Os12g14070 PE=2 SV=1	74269	51.7	5.11	-0.0005	14591	40.11	GPNDGDVIDADFTDSN
Q2QV45	70 kDa heat shock protein OS=Oryza sativa subsp. japonica GN=LOC_Os12g14070 PE=2 SV=1	74269	51.7	5.11	0.0012	14593	30.5	GPNDGDVIDADFTDSN
Q2QV45	70 kDa heat shock protein OS=Oryza sativa subsp. japonica GN=LOC_Os12g14070 PE=2 SV=1	74269	51.7	5.11	0.0006	14970	59.58	IINEPTAASLAYGFEK
Q2QV45	70 kDa heat shock protein OS=Oryza sativa subsp. japonica GN=LOC_Os12g14070 PE=2 SV=1	74269	51.7	5.11	0.0018	14972	45.68	IINEPTAASLAYGFEK
Q2QV45	70 kDa heat shock protein OS=Oryza sativa subsp. japonica GN=LOC_Os12g14070 PE=2 SV=1	74269	51.7	5.11	0.0022	14973	82.67	IINEPTAASLAYGFEK
Q2QV45	70 kDa heat shock protein OS=Oryza sativa subsp. japonica GN=LOC_Os12g14070 PE=2 SV=1	74269	51.7	5.11	-0.0041	16366	48.22	KQDITITGASTLPKDEVER
Q2QV45	70 kDa heat shock protein OS=Oryza sativa subsp. japonica GN=LOC_Os12g14070 PE=2 SV=1	74269	51.7	5.11	0.0017	16367	103.17	KQDITITGASTLPKDEVER
Q2QV45	70 kDa heat shock protein OS=Oryza sativa subsp. japonica GN=LOC_Os12g14070 PE=2 SV=1	74269	51.7	5.11	0.0018	16921	120.94	MELSTLSQTNISLPFITATADGPK
Q2QV45	70 kDa heat shock protein OS=Oryza sativa subsp. japonica GN=LOC_Os12g14070 PE=2 SV=1	74269	51.7	5.11	-0.0095	16977	88.56	DPNVTVNPDEVVSLGAAVQGGVLAGDVK
Q2QV45	70 kDa heat shock protein OS=Oryza sativa subsp. japonica GN=LOC_Os12g14070 PE=2 SV=1	74269	51.7	5.11	-0.0039	16978	134.86	DPNVTVNPDEVVSLGAAVQGGVLAGDVK
Q2QV45	70 kDa heat shock protein OS=Oryza sativa subsp. japonica GN=LOC_Os12g14070 PE=2 SV=1	74269	51.7	5.11	0.0095	17121	109.81	VVGIDLGTTNSAVAAMEGGKPTVITNAEGQR
Q75GX9	Cupin family protein, expressed OS=Oryza sativa subsp. japonica GN=OSJNBa0034D21.12 PE=4 SV=1	63845	37.2	8.35	0.0002	68	40.01	KLIVTK
Q75GX9	Cupin family protein, expressed OS=Oryza sativa subsp. japonica GN=OSJNBa0034D21.12 PE=4 SV=1	63845	37.2	8.35	-0.0003	1121	31.41	WSYAIR
Q75GX9	Cupin family protein, expressed OS=Oryza sativa subsp. japonica GN=OSJNBa0034D21.12 PE=4 SV=1	63845	37.2	8.35	0.0001	1123	25.82	WSYAIR
Q75GX9	Cupin family protein, expressed OS=Oryza sativa subsp. japonica GN=OSJNBa0034D21.12 PE=4 SV=1	63845	37.2	8.35	0.0009	1124	27.57	WSYAIR
Q75GX9	Cupin family protein, expressed OS=Oryza sativa subsp. japonica GN=OSJNBa0034D21.12 PE=4 SV=1	63845	37.2	8.35	-0.0003	1170	36.73	KLDPQAK
Q75GX9	Cupin family protein, expressed OS=Oryza sativa subsp. japonica GN=OSJNBa0034D21.12 PE=4 SV=1	63845	37.2	8.35	-0.0001	1171	43.08	KLDPQAK
Q75GX9	Cupin family protein, expressed OS=Oryza sativa subsp. japonica GN=OSJNBa0034D21.12 PE=4 SV=1	63845	37.2	8.35	0.0001	1172	22.2	KLDPQAK
Q75GX9	Cupin family protein, expressed OS=Oryza sativa subsp. japonica GN=OSJNBa0034D21.12 PE=4 SV=1	63845	37.2	8.35	-0.0003	1615	47.25	ASEEQVR
Q75GX9	Cupin family protein, expressed OS=Oryza sativa subsp. japonica GN=OSJNBa0034D21.12 PE=4 SV=1	63845	37.2	8.35	0.001	1616	21.99	ASEEQVR
Q75GX9	Cupin family protein, expressed OS=Oryza sativa subsp. japonica GN=OSJNBa0034D21.12 PE=4 SV=1	63845	37.2	8.35	-0.0007	1970	45.43	LYEADAR
Q75GX9	Cupin family protein, expressed OS=Oryza sativa subsp. japonica GN=OSJNBa0034D21.12 PE=4 SV=1	63845	37.2	8.35	-0.0003	1971	42.87	LYEADAR
Q75GX9	Cupin family protein, expressed OS=Oryza sativa subsp. japonica GN=OSJNBa0034D21.12 PE=4 SV=1	63845	37.2	8.35	-0.0002	1972	48.09	LYEADAR
Q75GX9	Cupin family protein, expressed OS=Oryza sativa subsp. japonica GN=OSJNBa0034D21.12 PE=4 SV=1	63845	37.2	8.35	0	1973	37.58	LYEADAR
Q75GX9	Cupin family protein, expressed OS=Oryza sativa subsp. japonica GN=OSJNBa0034D21.12 PE=4 SV=1	63845	37.2	8.35	0	1974	30	LYEADAR
Q75GX9	Cupin family protein, expressed OS=Oryza sativa subsp. japonica GN=OSJNBa0034D21.12 PE=4 SV=1	63845	37.2	8.35	0.0009	1975	40.71	LYEADAR
Q75GX9	Cupin family protein, expressed OS=Oryza sativa subsp. japonica GN=OSJNBa0034D21.12 PE=4 SV=1	63845	37.2	8.35	0.0021	1976	27.77	LYEADAR
Q75GX9	Cupin family protein, expressed OS=Oryza sativa subsp. japonica GN=OSJNBa0034D21.12 PE=4 SV=1	63845	37.2	8.35	0.0008	3486	28.71	ELAFAASAR
Q75GX9	Cupin family protein, expressed OS=Oryza sativa subsp. japonica GN=OSJNBa0034D21.12 PE=4 SV=1	63845	37.2	8.35	0	4103	39.93	VAVLEANPR
Q75GX9	Cupin family protein, expressed OS=Oryza sativa subsp. japonica GN=OSJNBa0034D21.12 PE=4 SV=1	63845	37.2	8.35	0	4104	56.65	VAVLEANPR
Q75GX9	Cupin family protein, expressed OS=Oryza sativa subsp. japonica GN=OSJNBa0034D21.12 PE=4 SV=1	63845	37.2	8.35	0	4105	24.14	VAVLEANPR
Q75GX9	Cupin family protein, expressed OS=Oryza sativa subsp. japonica GN=OSJNBa0034D21.12 PE=4 SV=1	63845	37.2	8.35	0	4106	22.71	VAVLEANPR
Q75GX9	Cupin family protein, expressed OS=Oryza sativa subsp. japonica GN=OSJNBa0034D21.12 PE=4 SV=1	63845	37.2	8.35	0.0001	4107	54.19	VAVLEANPR
Q75GX9	Cupin family protein, expressed OS=Oryza sativa subsp. japonica GN=OSJNBa0034D21.12 PE=4 SV=1	63845	37.2	8.35	0.0001	4108	34.83	VAVLEANPR
Q75GX9	Cupin family protein, expressed OS=Oryza sativa subsp. japonica GN=OSJNBa0034D21.12 PE=4 SV=1	63845	37.2	8.35	0.0001	4109	47.25	VAVLEANPR
Q75GX9	Cupin family protein, expressed OS=Oryza sativa subsp. japonica GN=OSJNBa0034D21.12 PE=4 SV=1	63845	37.2	8.35	0.0001	4110	57.98	VAVLEANPR
Q75GX9	Cupin family protein, expressed OS=Oryza sativa subsp. japonica GN=OSJNBa0034D21.12 PE=4 SV=1	63845	37.2	8.35	0.0001	4111	58.71	VAVLEANPR
Q75GX9	Cupin family protein, expressed OS=Oryza sativa subsp. japonica GN=OSJNBa0034D21.12 PE=4 SV=1	63845	37.2	8.35	0.0001	4112	53.95	VAVLEANPR
Q75GX9	Cupin family protein, expressed OS=Oryza sativa subsp. japonica GN=OSJNBa0034D21.12 PE=4 SV=1	63845	37.2	8.35	0.0001	4113	58.06	VAVLEANPR
Q75GX9	Cupin family protein, expressed OS=Oryza sativa subsp. japonica GN=OSJNBa0034D21.12 PE=4 SV=1	63845	37.2	8.35	0.0001	4114	40.79	VAVLEANPR
Q75GX9	Cupin family protein, expressed OS=Oryza sativa subsp. japonica GN=OSJNBa0034D21.12 PE=4 SV=1	63845	37.2	8.35	0.0001	4115	52.95	VAVLEANPR
Q75GX9	Cupin family protein, expressed OS=Oryza sativa subsp. japonica GN=OSJNBa0034D21.12 PE=4 SV=1	63845	37.2	8.35	0.0001	4116	43.36	VAVLEANPR
Q75GX9	Cupin family protein, expressed OS=Oryza sativa subsp. japonica GN=OSJNBa0034D21.12 PE=4 SV=1	63845	37.2	8.35	0.0001	4117	39.99	VAVLEANPR
Q75GX9	Cupin family protein, expressed OS=Oryza sativa subsp. japonica GN=OSJNBa0034D21.12 PE=4 SV=1	63845	37.2	8.35	0.0001	4118	39.61	VAVLEANPR
Q75GX9	Cupin family protein, expressed OS=Oryza sativa subsp. japonica GN=OSJNBa0034D21.12 PE=4 SV=1	63845	37.2	8.35	0.0001	4119	58.47	VAVLEANPR
Q75GX9	Cupin family protein, expressed OS=Oryza sativa subsp. japonica GN=OSJNBa0034D21.12 PE=4 SV=1	63845	37.2	8.35	0.0001	4120	58.32	VAVLEANPR
Q75GX9	Cupin family protein, expressed OS=Oryza sativa subsp. japonica GN=OSJNBa0034D21.12 PE=4 SV=1	63845	37.2	8.35	0.0001	4121	52.52	VAVLEANPR
Q75GX9	Cupin family protein, expressed OS=Oryza sativa subsp. japonica GN=OSJNBa0034D21.12 PE=4 SV=1	63845	37.2	8.35	0.0001	4122	39.12	VAVLEANPR
Q75GX9	Cupin family protein, expressed OS=Oryza sativa subsp. japonica GN=OSJNBa0034D21.12 PE=4 SV=1	63845	37.2	8.35	0.0001	4123	53.21	VAVLEANPR
Q75GX9	Cupin family protein, expressed OS=Oryza sativa subsp. japonica GN=OSJNBa0034D21.12 PE=4 SV=1	63845	37.2	8.35	0.0001	4124	52.87	VAVLEANPR
Q75GX9	Cupin family protein, expressed OS=Oryza sativa subsp. japonica GN=OSJNBa0034D21.12 PE=4 SV=1	63845	37.2	8.35	0.0001	4125	48.6	VAVLEANPR
Q75GX9	Cupin family protein, expressed OS=Oryza sativa subsp. japonica GN=OSJNBa0034D21.12 PE=4 SV=1	63845	37.2	8.35	0.0002	4126	59.11	VAVLEANPR
Q75GX9	Cupin family protein, expressed OS=Oryza sativa subsp. japonica GN=OSJNBa0034D21.12 PE=4 SV=1	63845	37.2	8.35	0.0002	4127	52.71	VAVLEANPR
Q75GX9	Cupin family protein, expressed OS=Oryza sativa subsp. japonica GN=OSJNBa0034D21.12 PE=4 SV=1	63845	37.2	8.35	0.0002	4128	55.28	VAVLEANPR
Q75GX9	Cupin family protein, expressed OS=Oryza sativa subsp. japonica GN=OSJNBa0034D21.12 PE=4 SV=1	63845	37.2	8.35	0.0002	4129	48.35	VAVLEANPR
Q75GX9	Cupin family protein, expressed OS=Oryza sativa subsp. japonica GN=OSJNBa0034D21.12 PE=4 SV=1	63845	37.2	8.35	0.0002	4130	40.46	VAVLEANPR
Q75GX9	Cupin family protein, expressed OS=Oryza sativa subsp. japonica GN=OSJNBa0034D21.12 PE=4 SV=1	63845	37.2	8.35	0.0002	4131	52.87	VAVLEANPR
Q75GX9	Cupin family protein, expressed OS=Oryza sativa subsp. japonica GN=OSJNBa0034D21.12 PE=4 SV=1	63845	37.2	8.35	0.0002	4132	66.21	VAVLEANPR
Q75GX9	Cupin family protein, expressed OS=Oryza sativa subsp. japonica GN=OSJNBa0034D21.12 PE=4 SV=1	63845	37.2	8.35	0.0003	4133	40.57	VAVLEANPR
Q75GX9	Cupin family protein, expressed OS=Oryza sativa subsp. japonica GN=OSJNBa0034D21.12 PE=4 SV=1	63845	37.2	8.35	0.0003	4134	47.42	VAVLEANPR
Q75GX9	Cupin family protein, expressed OS=Oryza sativa subsp. japonica GN=OSJNBa0034D21.12 PE=4 SV=1	63845	37.2	8.35	0.0003	4135	40.51	VAVLEANPR
Q75GX9	Cupin family protein, expressed OS=Oryza sativa subsp. japonica GN=OSJNBa0034D21.12 PE=4 SV=1	63845	37.2	8.35	0.0003	4136	53.39	VAVLEANPR
Q75GX9	Cupin family protein, expressed OS=Oryza sativa subsp. japonica GN=OSJNBa0034D21.12 PE=4 SV=1	63845	37.2	8.35	0.0003	4137	48.21	VAVLEANPR
Q75GX9	Cupin family protein, expressed OS=Oryza sativa subsp. japonica GN=OSJNBa0034D21.12 PE=4 SV=1	63845	37.2	8.35	0.0003	4138	51.43	VAVLEANPR
Q75GX9	Cupin family protein, expressed OS=Oryza sativa subsp. japonica GN=OSJNBa0034D21.12 PE=4 SV=1	63845	37.2	8.35	0.0003	4139	54.5	VAVLEANPR
Q75GX9	Cupin family protein, expressed OS=Oryza sativa subsp. japonica GN=OSJNBa0034D21.12 PE=4 SV=1	63845	37.2	8.35	0.0003	4140	47.14	VAVLEANPR
Q75GX9	Cupin family protein, expressed OS=Oryza sativa subsp. japonica GN=OSJNBa0034D21.12 PE=4 SV=1	63845	37.2	8.35	0.0003	4141	34.73	VAVLEANPR
Q75GX9	Cupin family protein, expressed OS=Oryza sativa subsp. japonica GN=OSJNBa0034D21.12 PE=4 SV=1	63845	37.2	8.35	0.0003	4142	53.04	VAVLEANPR
Q75GX9	Cupin family protein, expressed OS=Oryza sativa subsp. japonica GN=OSJNBa0034D21.12 PE=4 SV=1	63845	37.2	8.35	0.0003	4143	56.93	VAVLEANPR
Q75GX9	Cupin family protein, expressed OS=Oryza sativa subsp. japonica GN=OSJNBa0034D21.12 PE=4 SV=1	63845	37.2	8.35	0.0003	4144	55.49	VAVLEANPR
Q75GX9	Cupin family protein, expressed OS=Oryza sativa subsp. japonica GN=OSJNBa0034D21.12 PE=4 SV=1	63845	37.2	8.35	0.0003	4145	51.88	VAVLEANPR
Q75GX9	Cupin family protein, expressed OS=Oryza sativa subsp. japonica GN=OSJNBa0034D21.12 PE=4 SV=1	63845	37.2	8.35	0.0004	4146	61.28	VAVLEANPR
Q75GX9	Cupin family protein, expressed OS=Oryza sativa subsp. japonica GN=OSJNBa0034D21.12 PE=4 SV=1	63845	37.2	8.35	0.0004	4147	37.81	VAVLEANPR
Q75GX9	Cupin family protein, expressed OS=Oryza sativa subsp. japonica GN=OSJNBa0034D21.12 PE=4 SV=1	63845	37.2	8.35	0.0004	4148	28.8	VAVLEANPR
[truncated: 3,654 more rows]

## Sheet: A3
prot_acc	prot_desc	prot_mass	prot_cover	prot_pi	pep_delta	pep_query	pep_score	pep_seq
[truncated: 4,042 more rows]
