# Supplementary material for: Proteome Profile of Starch Granules Purified from Rice (Oryza sativa) Endosperm
Source: PLoS One. 2016 Dec 19;11(12):e0168467. doi: 10.1371/journal.pone.0168467 (PMC5167393; doi:10.1371/journal.pone.0168467)
Supplement: S6 Table — (XLS) [file pone.0168467.s007.xls]

## Sheet: Sheet1
Protein	Count	Fasta headers	Subcellular Location
chloroplast/amyloplast proteins
Q0DEV5	2769	"Granule-bound starch synthase 1, chloroplastic/amyloplastic OS=Oryza sativa subsp. japonica GN=WAXY PE=1 SV=1"	chloroplast
Q6H6P8	472	Branching enzyme-3 OS=Oryza sativa subsp. japonica GN=P0475F05.16 PE=4 SV=1	chloroplast
Q0D9D0	448	Os06g0726400 protein OS=Oryza sativa subsp. japonica GN=SBE1 PE=2 SV=1	chloroplast
Q0DEC8	386	"Soluble starch synthase 1, chloroplastic/amyloplastic OS=Oryza sativa subsp. japonica GN=Os06g0160700 PE=1 SV=1"	chloroplast
Q6AVA8	291	"Pyruvate, phosphate dikinase 1, chloroplastic OS=Oryza sativa subsp. japonica GN=PPDK1 PE=1 SV=1"	chloroplast
Q9AUV8	260	Phosphorylase OS=Oryza sativa subsp. japonica GN=OSJNBa0040E01.3 PE=3 SV=1	chloroplast
Q6Z782	259	Os02g0202400 protein OS=Oryza sativa subsp. japonica GN=P0419A09.38 PE=3 SV=1	chloroplast
Q2QV45	205	70 kDa heat shock protein OS=Oryza sativa subsp. japonica GN=LOC_Os12g14070 PE=2 SV=1	chloroplast
Q0DDE3	179	"Soluble starch synthase 2-3, chloroplastic/amyloplastic OS=Oryza sativa subsp. japonica GN=SSII-3 PE=1 SV=1"	chloroplast
Q0DA62	164	Os06g0675700 protein OS=Oryza sativa subsp. japonica GN=Os06g0675700 PE=4 SV=1	chloroplast
Q10NF2	130	"Chloroplastic outer envelope membrane protein, putative, expressed OS=Oryza sativa subsp. japonica GN=Os03g0271200 PE=4 SV=1"	chloroplast
Q8GTK0	103	Granule binding starch synthase II OS=Oryza sativa subsp. japonica GN=P0710F09.134 PE=3 SV=1	chloroplast
	5666
non-chloroplast/amyloplast proteins
Q7X834	269	OSJNBa0019G23.2 protein OS=Oryza sativa subsp. japonica GN=OSJNBa0019G23.2 PE=4 SV=2	endoplasmic reticulum
P15280	206	"Glucose-1-phosphate adenylyltransferase small subunit, chloroplastic/amyloplastic OS=Oryza sativa subsp. japonica GN=AGPS PE=2 SV=4"	cytosol
Q5VNT5	193	Glucose-1-phosphate adenylyltransferase OS=Oryza sativa subsp. japonica GN=P0663E10.9 PE=3 SV=1	cytosol
P30298	187	Sucrose synthase 2 OS=Oryza sativa subsp. japonica GN=SUS2 PE=1 SV=2	cytosol
Q6Z7B0	168	Dnak-type molecular chaperone Bip OS=Oryza sativa subsp. japonica GN=P0036E06.29 PE=2 SV=1	endoplasmic reticulum
Q43009	165	Sucrose synthase 3 OS=Oryza sativa subsp. japonica GN=SUS3 PE=1 SV=2	cytosol
Q0E2G5	157	Os02g0242600 protein (Fragment) OS=Oryza sativa subsp. japonica GN=Os02g0242600 PE=4 SV=1	vacuolar membrane
Q6ZBH2	153	Os08g0545200 protein OS=Oryza sativa subsp. japonica GN=P0623F08.37 PE=2 SV=1	cytosol
Q6K5G8	152	"Glyceraldehyde-3-phosphate dehydrogenase 3, cytosolic OS=Oryza sativa subsp. japonica GN=GAPC3 PE=2 SV=1"	cytosol
Q53LQ0	135	Protein disulfide isomerase-like 1-1 OS=Oryza sativa subsp. japonica GN=PDIL1-1 PE=2 SV=1	endoplasmic reticulum
Q7FAH2	127	"Glyceraldehyde-3-phosphate dehydrogenase 2, cytosolic OS=Oryza sativa subsp. japonica GN=GAPC2 PE=1 SV=1"	cytosol
Q10QZ6	126	Elongation factor 1-alpha OS=Oryza sativa subsp. japonica GN=Os03g0177400 PE=2 SV=1	cytosol
Q6H4L2	120	Elongation factor 2 OS=Oryza sativa subsp. japonica GN=P0461D06.32 PE=2 SV=1	cytosol
Q7XTK1	113	Elongation factor OS=Oryza sativa subsp. japonica GN=OSJNBa0020P07.3 PE=2 SV=2	cytosol
Q0J8A4	108	"Glyceraldehyde-3-phosphate dehydrogenase 1, cytosolic OS=Oryza sativa subsp. japonica GN=GAPC1 PE=1 SV=1"	cytosol
Q5N725	108	Fructose-bisphosphate aldolase OS=Oryza sativa subsp. japonica GN=B1417F08.1-1 PE=2 SV=1	cytosol
Q0JDG9	101	Os04g0404400 protein OS=Oryza sativa subsp. japonica GN=Os04g0404400 PE=4 SV=2	cytosol
	2588
	5666
	2588
