# Supplementary material for: Proteome Profile of Starch Granules Purified from Rice (Oryza sativa) Endosperm
Source: PLoS One. 2016 Dec 19;11(12):e0168467. doi: 10.1371/journal.pone.0168467 (PMC5167393; doi:10.1371/journal.pone.0168467)
Supplement: S7 Table — (XLS) [file pone.0168467.s008.xls]

## Sheet: starch and sucrose metabolism
Protein	Enzyme Entry	Gene description
P15280	[EC:2.7.7.27]	glgC:glucose-1-phosphate adenylyltransferase
P30298	[EC:2.4.1.13]	sucrose synthase 2
Q0D9D0	[EC:2.4.1.18]	glgB:1,4-alpha-glucan branching enzyme
Q0DEV5	[EC:2.4.1.11]	Granule-bound starch synthase 1
Q0J8G4	[EC:2.7.1.4]	Fructokinase-2
Q43009	[EC:2.4.1.13]	sucrose synthase 3
Q5VNT5	[EC:2.7.7.27]	glgC:glucose-1-phosphate adenylyltransferase
Q69Q02	[EC:2.4.1.25]	malQ:4-alpha-glucanotransferase
Q69T99	[EC:2.7.7.27]	glgC:glucose-1-phosphate adenylyltransferase
Q6AVT2	[EC:2.7.7.27]	glgC:glucose-1-phosphate adenylyltransferase
	[EC:2.4.1.18]	glgB:1,4-alpha-glucan branching enzyme 3
Q6H6P8
Q8LQ33	[EC:2.4.1.1]	starch phosphorylase
Q93X08	[EC:2.7.7.9]	UGP2:UTP--glucose-1-phosphate uridylyltransferase
Q9AUQ4	[EC:5.4.2.2]	pgm:phosphoglucomutase
Q9AUV8	[EC:2.4.1.1]	starch phosphorylase

## Sheet: Citrate Cycle (TCA) Pathway
Protein	Enzyme Entry	Gene description
Q0JDN5	[EC:1.2.4.2]	OGDH:2-oxoglutarate dehydrogenase E1 component
Q10S34	[EC:4.2.1.3];	ACO:aconitate hydratase
Q654V6	[EC:1.2.4.1]	PDHA:pyruvate dehydrogenase E1 component alpha-2 subunit
Q6Z5N4	[EC:1.2.4.1]	PDHA:pyruvate dehydrogenase E1 component alpha-1 subunit
Q7XTJ3	[EC:1.2.4.1]	PDHA:pyruvate dehydrogenase E1 component alpha-3 subunit
Q93VT8	[EC:2.3.3.8];	ACLY:ATP citrate (pro-S)-lyase
Q9ASP4	[EC:1.8.1.4];	DLD:dihydrolipoamide dehydrogenase

## Sheet: Glycolysis and gluconeogenesis 
Protein	Enzyme Entry	Gene description
Q0J8A4	[EC:1.2.1.12]	GAPDH: glyceraldehyde 3-phosphate dehydrogenase 1
Q10MW3	[EC:4.1.1.1];	pyruvate decarboxylase 2
Q2QXR8	[EC:2.7.1.40];	PK: pyruvate kinase
Q42971	[EC:4.2.1.11];	ENO:enolase
Q5N725	[EC:4.1.2.13];	ALDO: fructose-bisphosphate aldolase, class I
Q655T1	[EC:2.7.2.3];	PGK: phosphoglycerate kinase
Q6H6C7	[EC:2.7.2.3];	PGK: phosphoglycerate kinase
Q6K5G8	[EC:1.2.1.12];	GAPDH:glyceraldehyde 3-phosphate dehydrogenase 3
Q6Z5N4	[EC:1.2.4.1];	PDHA:pyruvate dehydrogenase E1 component alpha subunit
Q7FAH2	[EC:1.2.1.12];	GAPDH: glyceraldehyde 3-phosphate dehydrogenase 2
Q7XTJ3	[EC:1.2.4.1];	PDHA:pyruvate dehydrogenase E1 component alpha subunit
Q9ASP4	[EC:1.8.1.4];	DLD:dihydrolipoamide dehydrogenase
Q9AUQ4	[EC:5.4.2.2];	PGM: phosphoglucomutase

## Sheet: Carbon metabolism
Protein	Enzyme entry	Gene description
Q5N725	[EC:4.1.2.13];	ALDO:fructose-bisphosphate aldolase, class I
Q0ISV6	[EC:2.1.2.1]	glyA:glycine hydroxymethyltransferase
Q7FAH2	[EC:1.2.1.12]	GAPDH: glyceraldehyde 3-phosphate dehydrogenase 2
Q0J8A4	[EC:1.2.1.12]	GAPDH: glyceraldehyde 3-phosphate dehydrogenase 1
Q0JDN5	[EC:1.2.4.2]	OGDH:2-oxoglutarate dehydrogenase E1 component
Q10S34	[EC:4.2.1.3]	ACO:aconitate hydratase
Q2QXR8	[EC:2.7.1.40]	PK:pyruvate kinase
Q338N8	[EC:2.6.1.2]	GPT:alanine transaminase
Q42971	[EC:4.2.1.11]	ENO:enolase
Q5JKW5	[EC:1.1.1.40];	malate dehydrogenase (oxaloacetate-decarboxylating)(NADP+)
Q5N725	[EC:4.1.2.13]	ALDO:fructose-bisphosphate aldolase, class I
Q654V6	[EC:1.2.4.1]	PDHA:pyruvate dehydrogenase E1 component alpha-2 subunit
Q6Z5N4	[EC:1.2.4.1]	PDHA: pyruvate dehydrogenase E1 component alpha-1 subunit
Q655T1	[EC:2.7.2.3]	PGK:phosphoglycerate kinase
Q6H6C7	[EC:2.7.2.3];	PGK:phosphoglycerate kinase
Q6AVA8	[EC:2.7.9.1]	ppdK:pyruvate, orthophosphate dikinase
Q6H6C7	[EC:2.7.2.3]	PGK:phosphoglycerate kinase
Q6K5G8	[EC:1.2.1.12];	GAPDH:glyceraldehyde 3-phosphate dehydrogenase
Q7FAH2	[EC:1.2.1.12];	GAPDH:glyceraldehyde 3-phosphate dehydrogenase
Q6Z4E4	[EC:1.2.1.18 1.2.1.27];	mmsA:malonate-semialdehyde dehydrogenase (acetylating) / methylmalonate-semialdehyde dehydrogenase
Q6Z5N4	[EC:1.2.4.1];	PDHA:pyruvate dehydrogenase E1 component alpha subunit
Q75KR1	[EC:2.7.9.1];	ppdK:pyruvate, orthophosphate dikinase
Q7XMP6	[EC:1.1.1.95];	serA:D-3-phosphoglycerate dehydrogenase
Q7XTJ3	[EC:1.2.4.1];	PDHA:pyruvate dehydrogenase E1 component alpha subunit
Q9ASP4	[EC:1.8.1.4];	DLD:dihydrolipoamide dehydrogenase
Q9LI00	[EC:1.1.1.44];	PGD:6-phosphogluconate dehydrogenase
Q654U8	[EC:2.7.1.90];	pyrophosphate--fructose-6-phosphate 1-phosphotransferase subunit beta
Q84QT9	[EC:2.7.1.90];	pyrophosphate--fructose-6-phosphate 1-phosphotransferase subunit alpha
